# Supplementary material for: Dietary-fat supplementation alleviates cold temperature-induced metabolic dysbiosis and barrier impairment by remodeling gut microbiota
Source: Royal Society of Chemistry journal article supplement (doi:10.1039/d3fo04916g), 2024-01-01
Supplement: d3fo04916g2.xlsx [file d3fo04916g2.xlsx]

## Sheet: 16s
						Ileum																		Colon
Phylum	Class	Order	Family	Genus	Species	CON1-1	CON1-2	CON1-3	CON1-4	CON1-5	CON1-6	CL1-1	CL1-2	CL1-3	CL1-4	CL1-5	CL1-6	CH1-1	CH1-2	CH1-3	CH1-4	CH1-5	CH1-6	CON1-1	CON1-2	CON1-3	CON1-4	CON1-5	CON1-6	CL1-1	CL1-2	CL1-3	CL1-4	CL1-5	CL1-6	CH1-1	CH1-2	CH1-3	CH1-4	CH1-5	CH1-6
Unassigned	Unassigned	Unassigned	Unassigned	Unassigned	Unassigned	0	0	0	0	0	0	2.68579e-05	0	0	0	0	0	0	0	0	0	0	0	0	0	0	0	0	0	0	0	0	0	0	0	0	0	0	0	0	0
Euryarchaeota	Methanobacteria	Methanobacteriales	Methanobacteriaceae	Methanobacterium	unclassified_Methanobacterium	0	0	0	0	0	0	0	0	0	0	0	0	0	0	0	0	0	0	0	0	0	0	0	0	0	0	0	0	0	0	0	0	0	0	0	0
Euryarchaeota	Methanobacteria	Methanobacteriales	Methanobacteriaceae	Methanosphaera	uncultured_archaeon	0	0	0	3.85178e-05	0	0	0	0	0	0	0	0	0	0	0	0	0	0	0	0	0	0	0	0	0	0	0	0	0	0	0	0	0	0	0	0
Thermoplasmatota	Thermoplasmata	Marine_Benthic_Group_D_and_DHVEG_1	unclassified_Marine_Benthic_Group_D_and_DHVEG_1	unclassified_Marine_Benthic_Group_D_and_DHVEG_1	unclassified_Marine_Benthic_Group_D_and_DHVEG_1	0	0	0	0	0	0	0	0	0	0	0	0	0	0	0	0	0	0	0	0	0	0	0	0	0	0	0	0	0	0	0	0	0	0	0	0
Acidobacteriota	Acidobacteriae	Acidobacteriales	Acidobacteriaceae__Subgroup_1	Edaphobacter	unclassified_Edaphobacter	0	0	0	0	0	0	0	0	0	0	0	0	0	0	0	0	0	0	0	0	0	0	0	0	0	0	0	0	0	0	0	0	0	0	0	0
Acidobacteriota	Acidobacteriae	Acidobacteriales	unclassified_Acidobacteriales	unclassified_Acidobacteriales	unclassified_Acidobacteriales	0	3.98857e-05	0	0	0	0	0	0	0	0	0	0	0	0	0	0	0	0	0	0	0	0	0	0	0	0	0	0	0	0	0	0	0	0	0	0
Acidobacteriota	Acidobacteriae	Acidobacteriales	unclassified_Acidobacteriales	uncultured_Candidatus_Koribacter_sp.	unclassified_Acidobacteriales	0	0	0	0	0	0	0	0	0	0	2.59047e-05	0	0	0	0	0	0	0	0	0	0	0	0	0	0	0	0	0	0	0	0	0	0	0	0	0
Acidobacteriota	Acidobacteriae	Acidobacteriales	unclassified_Acidobacteriales	uncultured_forest_soil_bacterium	unclassified_Acidobacteriales	0	0	0	0	0	0	0	0	0	0	0	0	0	0	0	0	0	0	0	0	0	0	0	0	0	0	0	0	0	0	0	0	0	0	0	3.02485e-05
Acidobacteriota	Acidobacteriae	Bryobacterales	Bryobacteraceae	Bryobacter	unclassified_Bryobacter	0	0	0	0	0	0	0	0	0	0	2.59047e-05	0	0	0	0	0	0	0	0	0	0	0	0	0	0	0	0	0	0	0	0	0	0	0	0	0
Acidobacteriota	Acidobacteriae	Bryobacterales	Bryobacteraceae	Bryobacter	uncultured_Acidobacteria_bacterium	0	0	0	0	0	0	0	0	0	0	0	0	0	0	0	0	0	0	0	0	0	0	0	0	0	0	0	0	0	0	0	0	0	0	0	0
Acidobacteriota	Acidobacteriae	Solibacterales	Solibacteraceae	Candidatus_Solibacter	unclassified_Candidatus_Solibacter	0	0	0	0	0	3.97125e-05	0	0	0	0	6.47618e-05	0	0	0	0	0	0	0	0	0	0	0	0	0	0	0	0	0	0	0	0	0	0	0	0	0
Acidobacteriota	Acidobacteriae	Subgroup_2	unclassified_Subgroup_2	unclassified_Subgroup_2	unclassified_Subgroup_2	0	0	0	0	0	2.6475e-05	0	0	0	0	0	0	0	0	0	0	0	0	0	0	0	0	0	0	0	0	0	0	0	0	0	0	0	0	0	0
Acidobacteriota	Acidobacteriae	Subgroup_2	uncultured_Acidobacteria_bacterium	uncultured_Acidobacteria_bacterium	uncultured_Acidobacteria_bacterium	0	0	0	0	0	0	0	0	0	0	0	0	0	0	0	0	0	0	0	0	0	0	0	0	0	0	0	0	0	0	0	0	0	0	0	0
Acidobacteriota	Blastocatellia	11_24	unclassified_11_24	unclassified_11_24	unclassified_11_24	0	0	0	0	0	0	0	0	0	0	0	0	0	0	0	0	0	0	0	0	0	0	0	0	0	0	0	0	0	0	0	0	0	0	0	0
Acidobacteriota	Blastocatellia	11_24	uncultured_Acidobacteria_bacterium	uncultured_Acidobacteria_bacterium	uncultured_Acidobacteria_bacterium	0	3.98857e-05	0	0	0	0	0	0	0	0	0	0	0	0	0	0	0	0	0	0	0	0	0	0	0	0	0	0	0	0	0	0	0	0	0	0
Acidobacteriota	Blastocatellia	Blastocatellales	Blastocatellaceae	unclassified_Blastocatellaceae	unclassified_Blastocatellaceae	0	0	0	0	0	0	0	0	0	0	2.59047e-05	0	0	0	0	0	0	0	0	0	0	0	0	0	0	0	0	0	0	0	0	0	0	0	0	0
Acidobacteriota	Blastocatellia	DS_100	uncultured_Acidobacteria_bacterium	uncultured_Acidobacteria_bacterium	uncultured_Acidobacteria_bacterium	0	0	0	0	0	0	0	0	0	0	0	0	0	0	0	0	0	0	0	0	0	0	0	0	0	0	0	0	0	0	0	0	0	0	0	0
Acidobacteriota	Blastocatellia	Pyrinomonadales	Pyrinomonadaceae	RB41	unclassified_RB41	0	0.000159543	2.68161e-05	0	0	0	0	0	2.64992e-05	0	2.59047e-05	0	2.7158e-05	0	0	0	0	0	0	0	0	0	0	0	0	0	0	0	0	0	0	0	0	0	0	0
Acidobacteriota	Blastocatellia	Pyrinomonadales	Pyrinomonadaceae	RB41	uncultured_Paenibacillus_sp.	0	0	0	0	0	0	0	0	0	0	0	0	0	0	0	0	0	0	0	0	0	0	0	0	0	0	0	0	0	0	0	1.468e-05	0	1.49094e-05	0	0
Acidobacteriota	Holophagae	Subgroup_7	unclassified_Subgroup_7	unclassified_Subgroup_7	unclassified_Subgroup_7	0.000302568	0	0	0	0	0	0	0	0	0	2.59047e-05	0	0	0	0	0	0	0	0	0	0	0	0	0	0	0	0	0	0	0	0	0	0	0	0	0
Acidobacteriota	Holophagae	Subgroup_7	uncultured_Desulfovirga_sp.	uncultured_Desulfovirga_sp.	uncultured_Desulfovirga_sp.	0.000407809	0	0	0	0	0	0	0	0	0	2.59047e-05	0	0	0	0	0	0	0	0	0	0	0	0	0	0	0	0	0	0	0	0	0	0	2.98187e-05	0	0
Acidobacteriota	Holophagae	Subgroup_7	uncultured_soil_bacterium	uncultured_soil_bacterium	uncultured_soil_bacterium	0	0	0	0	3.90401e-05	0	0	0	0	0	0	0	0	0	0	0	0	0	0	0	0	0	0	0	0	0	0	0	0	0	0	0	0	0	0	0
Acidobacteriota	Thermoanaerobaculia	Thermoanaerobaculales	Thermoanaerobaculaceae	Subgroup_10	unclassified_Subgroup_10	0	0	0	0	0	0	0	0	0	0	0	0	0	0	4.13405e-05	0	0	0	0	0	0	0	0	0	0	0	0	0	0	0	0	0	0	0	0	0
Acidobacteriota	Thermoanaerobaculia	Thermoanaerobaculales	Thermoanaerobaculaceae	Subgroup_23	uncultured_prokaryote	0	0	0	0	2.60268e-05	0	0	0	0	0	0	0	0	0	0	0	0	0	0	0	0	0	0	0	0	0	0	0	0	0	0	0	0	0	0	0
Acidobacteriota	Thermoanaerobaculia	Thermoanaerobaculales	Thermoanaerobaculaceae	TPD_58	unclassified_TPD_58	9.20859e-05	0	0	0	0	0	0	0	0	0	0	0	0	0	0	0	0	0	0	0	0	0	0	0	0	0	0	0	0	0	0	0	0	0	0	0
Acidobacteriota	Vicinamibacteria	Subgroup_17	unclassified_Subgroup_17	unclassified_Subgroup_17	unclassified_Subgroup_17	0	0	0	0	0	0	0	0	0	4.11896e-05	0	0	0	0	0	0	0	0	0	0	0	0	0	0	0	0	0	0	0	0	0	0	0	0	0	0
Acidobacteriota	Vicinamibacteria	Subgroup_17	uncultured_prokaryote	uncultured_prokaryote	uncultured_prokaryote	0	0	0	0	0	0	0	0	0	0	0	0	0	0	0	0	0	0	0	0	0	0	0	0	0	0	0	0	0	0	0	0	0	0	0	0
Acidobacteriota	Vicinamibacteria	Subgroup_9	uncultured_Acidobacteria_bacterium	uncultured_Acidobacteria_bacterium	uncultured_Acidobacteria_bacterium	0	0	0	0	0	0	0	0	0	0	0	0	0	0	0	0	0	0	0	0	0	0	0	0	0	0	0	0	0	0	0	0	0	0	0	0
Acidobacteriota	Vicinamibacteria	Vicinamibacterales	Vicinamibacteraceae	unclassified_Vicinamibacteraceae	unclassified_Vicinamibacteraceae	0	2.65904e-05	0	0	6.50669e-05	0	2.68579e-05	0	0	6.86493e-05	0	2.82183e-05	0	0	0	0	0	0	0	0	0	0	0	0	0	0	0	0	3.00107e-05	0	0	4.40399e-05	4.37541e-05	2.98187e-05	0	0
Acidobacteriota	Vicinamibacteria	Vicinamibacterales	unclassified_Vicinamibacterales	unclassified_Vicinamibacterales	unclassified_Vicinamibacterales	0.000736687	0	0	0	2.60268e-05	0	2.68579e-05	5.33889e-05	0	4.11896e-05	3.88571e-05	2.82183e-05	0	0	0	0	0	0	0	0	2.90381e-05	0	0	0	0	0	0	0	0	0	0	4.40399e-05	0	0	0	0
Acidobacteriota	Vicinamibacteria	Vicinamibacterales	unclassified_Vicinamibacterales	uncultured_bacterium_259	unclassified_Vicinamibacterales	0	0	0	0	0	0	0	0	0	0	3.88571e-05	0	0	0	0	0	0	0	0	0	0	0	0	0	0	0	0	0	0	0	0	0	0	0	0	0
Acidobacteriota	Vicinamibacteria	Vicinamibacterales	unclassified_Vicinamibacterales	uncultured_prokaryote	unclassified_Vicinamibacterales	0	0	0	0	2.60268e-05	0	0	0	0	0	0	0	0	0	0	0	0	0	0	0	0	0	0	0	0	0	0	0	0	0	0	0	0	0	0	0
Actinobacteriota	Acidimicrobiia	Actinomarinales	unclassified_Actinomarinales	unclassified_Actinomarinales	unclassified_Actinomarinales	0	0	0	0	0	0	0	0	0	0	0	0	0	0	0	0	0	0	0	0	0	0	0	0	0	0	0	0	0	0	0	0	0	0	0	0
Actinobacteriota	Acidimicrobiia	IMCC26256	unclassified_IMCC26256	unclassified_IMCC26256	unclassified_IMCC26256	0	0	0	0	0	0	0	0	0	0	0	0	0	0	0	0	0	0	0	0	0	0	0	0	0	0	0	0	0	0	0	0	0	0	0	0
Actinobacteriota	Acidimicrobiia	IMCC26256	uncultured_Ferrimicrobium_sp.	uncultured_Ferrimicrobium_sp.	uncultured_Ferrimicrobium_sp.	0	0	0	0	0	0	0	0	0	0	0	0	0	0	0	0	0	0	0	0	0	0	0	0	0	0	0	0	0	0	0	0	0	0	0	0
Actinobacteriota	Acidimicrobiia	Microtrichales	Iamiaceae	Iamia	Aquihabitans_daechungensis	0	0	0	0	0	0	0	0	0	4.11896e-05	0	0	0	0	0	0	0	0	0	0	0	0	0	0	0	0	0	0	0	0	0	0	0	0	0	0
Actinobacteriota	Acidimicrobiia	Microtrichales	Iamiaceae	Iamia	unclassified_Iamia	0	0	0	0	0	0	0	0	0	4.11896e-05	0	0	0	0	0	0	0	0	0	0	0	0	0	0	0	0	0	0	0	0	0	0	0	0	0	0
Actinobacteriota	Acidimicrobiia	Microtrichales	Iamiaceae	Iamia	uncultured_Acidimicrobiales_bacterium	0	0	0	0	0	0	0	0	0	0	0	0	0	0	0	0	0	0	0	0	0	0	0	0	0	0	0	0	0	0	0	0	0	0	0	0
Actinobacteriota	Acidimicrobiia	Microtrichales	Ilumatobacteraceae	CL500_29_marine_group	Hevea_brasiliensis_phytoplasma	0	0	0	0	0	0	0	0	0	0	0	0	0	0	0	0	0	0	0	0	0	0	0	0	0	0	0	0	0	0	0	0	0	0	0	0
Actinobacteriota	Acidimicrobiia	Microtrichales	Ilumatobacteraceae	CL500_29_marine_group	unclassified_CL500_29_marine_group	0	0	0	0	0	0	0	2.66944e-05	0	0	0	0	0	0	0	0	0	0	0	0	0	0	0	0	0	0	0	0	0	0	0	0	0	0	0	0
Actinobacteriota	Acidimicrobiia	Microtrichales	Ilumatobacteraceae	Ilumatobacter	Ilumatobacter_fluminis	0	0	0	0	0	0	0	0	0	0	0	0	0	0	0	0	0	0	0	0	0	0	0	0	0	0	0	0	0	0	0	0	0	0	0	6.0497e-05
Actinobacteriota	Acidimicrobiia	Microtrichales	Ilumatobacteraceae	Ilumatobacter	unclassified_Ilumatobacter	0	0	0	0	0	0	0	0	0	2.74597e-05	0	0	0	0	0	1.37236e-05	0	0	0	0	0	0	0	0	0	0	0	0	0	2.95007e-05	0	0	2.91694e-05	0	0	0
Actinobacteriota	Acidimicrobiia	Microtrichales	Ilumatobacteraceae	unclassified_Ilumatobacteraceae	unclassified_Ilumatobacteraceae	0	0	0	0	3.90401e-05	0	0	0	0	0	0	0	0	0	2.75604e-05	0	0	0	0	0	0	0	0	0	0	0	0	0	0	0	0	0	0	0	0	0
Actinobacteriota	Acidimicrobiia	Microtrichales	Microtrichaceae	Sva0996_marine_group	unclassified_Sva0996_marine_group	0	0	0	0	0	0	0	0	0	0	0	0	0	0	0	0	0	0	0	0	0	0	0	0	0	0	0	0	0	0	0	2.936e-05	0	0	0	0
Actinobacteriota	Acidimicrobiia	Microtrichales	unclassified_Microtrichales	unclassified_Microtrichales	unclassified_Microtrichales	0	0	0	0	0	3.97125e-05	0	0	0	0	0	0	0	2.64908e-05	2.75604e-05	0	2.71558e-05	0	0	0	0	0	0	0	0	0	0	0	0	0	0	0	0	0	0	0
Actinobacteriota	Acidimicrobiia	unclassified_Acidimicrobiia	unclassified_Acidimicrobiia	unclassified_Acidimicrobiia	unclassified_Acidimicrobiia	0	0	0	0	0	0	0	0	0	0	0	0	0	0	0	0	0	0	0	0	0	0	0	0	0	0	0	0	0	0	0	0	0	0	0	0
Actinobacteriota	Acidimicrobiia	unclassified_Acidimicrobiia	uncultured_Actinomycetales_bacterium	unclassified_Acidimicrobiia	unclassified_Acidimicrobiia	0	0	0	0	0	0	0	0	0	0	0	0	0	0	0	0	0	0	0	0	0	0	0	0	0	0	0	0	0	0	0	0	0	0	0	0
Actinobacteriota	Actinobacteria	Actinomycetales	Actinomycetaceae	Actinomyces	Actinomyces_howellii	0.000263103	0	0	0	0	0	0	0	0	8.23791e-05	0	0	0	0	0	6.86182e-05	0	0	0	0	0	0	0	0	0	0	0	0	0	0	0	0	0	0	0	0
Actinobacteriota	Actinobacteria	Actinomycetales	Actinomycetaceae	Actinomyces	Actinomyces_minihominis	0	0	0	0	0	0	0	0	0	5.49194e-05	0	0	0	0	0	0	0	0	0	0	0	0	0	0	0	0	0	0	0	0	0	0	0	0	0	0
Actinobacteriota	Actinobacteria	Actinomycetales	Actinomycetaceae	Actinomyces	Schaalia_hyovaginalis	0	0.000704647	0.000201121	0	0	0.000198562	0	4.00416e-05	0	0	0	0	0	0	0	0	0	0	0	1.44661e-05	0	0	0	0	0	0	0	0	0	0	0	0	0	0	0	0
Actinobacteriota	Actinobacteria	Actinomycetales	Actinomycetaceae	Actinomyces	unclassified_Actinomyces	0.000289413	0.000332381	0.000187713	0.000744678	0.000208214	0.00015885	0.000107432	0	3.97488e-05	0.000109839	5.18094e-05	0	2.7158e-05	0.000145699	0	0.000164684	0.000271558	0.000487034	0	0	0	0	2.97261e-05	0	0	1.45983e-05	0	0	0	1.47504e-05	0	0	0	0	0	0
Actinobacteriota	Actinobacteria	Actinomycetales	Actinomycetaceae	Actinotignum	unclassified_Actinotignum	0	0	0	2.56786e-05	0	0	0	0	0	0	0	0	0	0	0	0	0	0	0	0	0	0	0	0	0	0	0	0	0	0	0	0	0	0	0	0
Actinobacteriota	Actinobacteria	Actinomycetales	Actinomycetaceae	Arcanobacterium	unclassified_Arcanobacterium	0	0	0	5.13571e-05	0	0	0.000147718	0	0	0	0	0	5.43161e-05	0	0	0	0	0	0	0	0	0	0	0	0	0	0	0	0	0	0	0	0	0	0	0
Actinobacteriota	Actinobacteria	Actinomycetales	Actinomycetaceae	Flaviflexus	unclassified_Flaviflexus	0	0	4.02242e-05	0	0	0	0	0	0	0	0	0	0	0	0	0	0	0	0	0	0	0	0	0	0	0	0	0	0	0	0	0	0	0	0	0
Actinobacteriota	Actinobacteria	Actinomycetales	Actinomycetaceae	Trueperella	Trueperella_pyogenes	0.000302568	0.00372266	0	0.000924428	0	0.000225037	0	0	0	0.000219678	0.000582856	0	0	0.000754987	0.000427186	0.00997708	0.000502383	0.00115835	0	2.89323e-05	0	0	0	1.50392e-05	0	0	0	0	0	0	0	0	0	5.96374e-05	0	4.53727e-05
Actinobacteriota	Actinobacteria	Actinomycetales	Actinomycetaceae	Trueperella	unclassified_Trueperella	0.000315723	0	0.000268161	0	0	0	0	0	0	0	0	0	0	0	0	0.000192131	0	0	0	0	0	0	0	0	0	2.91967e-05	0	0	0	0	0	0	0	0	0	0
Actinobacteriota	Actinobacteria	Bifidobacteriales	Bifidobacteriaceae	Aeriscardovia	Aeriscardovia_aeriphila	0	0	0	2.56786e-05	0	0	0	0	0	0	0	0	0	0	0	0	0	0	0	0	0	0	0	0	0	0	0	0	0	0	0	0	0	0	0	0
Actinobacteriota	Actinobacteria	Bifidobacteriales	Bifidobacteriaceae	Bifidobacterium	Bifidobacterium_choerinum	0	0	0	0	0	0	0	0	0	0.000151028	0	0	0	0	0	0	0	0	0	0	0	0	0	0	0	0	0	0	0	0	0	0	0	0	0	0
Actinobacteriota	Actinobacteria	Bifidobacteriales	Bifidobacteriaceae	Bifidobacterium	Bifidobacterium_mongoliense	0	0	0	0.00168195	0	0	0	0	0	0	0	0	0	0	0	0	0	0	0	0	0	2.92073e-05	0	0	0	0	0	0	0	0	0	0	0	0	0	0
Actinobacteriota	Actinobacteria	Bifidobacteriales	Bifidobacteriaceae	Bifidobacterium	Bifidobacterium_subtile	0	0	0	0.000282464	0	0	0	0	0	0	0	0	0	0	0	0	0	0	0	0	0	0	0	0	0	0	0	0	0	0	0	0	0	0	0	0
Actinobacteriota	Actinobacteria	Bifidobacteriales	Bifidobacteriaceae	Bifidobacterium	unclassified_Bifidobacterium	0	0	2.68161e-05	0.00053925	0	0.000119137	0.000120861	0	0	0.00273224	0	0	0.00055674	0.00855652	0.00209459	0.000343091	0.00353026	0	0	0	0	0	0	0	1.50841e-05	2.91967e-05	0	0	0	0	2.89448e-05	1.468e-05	0	0	0	0
Actinobacteriota	Actinobacteria	Bifidobacteriales	Bifidobacteriaceae	Neoscardovia	Neoscardovia_arbecensis	0.000289413	7.97713e-05	0	0.000295303	0	0	0	0	0	0	0	0	0	0	0	0	0	0	0	0	0	0	0	0	0	0	0	0	0	0	0	0	0	0	0	0
Actinobacteriota	Actinobacteria	Bifidobacteriales	Bifidobacteriaceae	unclassified_Bifidobacteriaceae	unclassified_Bifidobacteriaceae	0.000223637	0	2.68161e-05	6.41964e-05	0	0.000132375	0	0	0	2.74597e-05	0	0	0	0	0	0	0	0	0	0	0	0	0	0	0	0	0	0	0	0	0	0	0	0	0	0
Actinobacteriota	Actinobacteria	Catenulisporales	Actinospicaceae	Actinospica	uncultured_actinobacterium	0	0	0	0	0	0	0	0	0	0	0	0	0	0	0	0	0	0	0	0	0	0	0	0	0	0	0	0	0	0	0	0	0	0	0	0
Actinobacteriota	Actinobacteria	Corynebacteriales	Corynebacteriaceae	Corynebacterium	Corynebacterium_bacterium_AIR_NUS_08	0	0	0	0	0	0	0	0	0	0.000851251	0	0	0	0	0.000372065	0.0007548	0.000461649	0	0	0	0	0	0	0	0	0	0	0	0	0	0	0	0	0	0	0
Actinobacteriota	Actinobacteria	Corynebacteriales	Corynebacteriaceae	Corynebacterium	Corynebacterium_frankenforstense	0	0	0	0	0	0	0	0	0	0	0	0	0	0	0	0	0	0	0	0	0	0	0	0	0	0	0	0	0	0	0	0	0	0	0	0
Actinobacteriota	Actinobacteria	Corynebacteriales	Corynebacteriaceae	Corynebacterium	Corynebacterium_guangdongense	0	0	2.68161e-05	0	0	0	0	0	0	0	0	0	0	0	0	0	0	0	0	0	0	0	0	0	0	0	0	0	0	0	0	0	0	0	0	0
Actinobacteriota	Actinobacteria	Corynebacteriales	Corynebacteriaceae	Corynebacterium	Corynebacterium_maris	0	0.000119657	0.000429058	0	0	0.00090015	0	0	0	6.86493e-05	0	0	0	0	0	5.48945e-05	0.00131706	2.63262e-05	0	0	0	0	0	0	0	0	0	0	0	0	0	0	0	0	0	0
Actinobacteriota	Actinobacteria	Corynebacteriales	Corynebacteriaceae	Corynebacterium	Corynebacterium_pilosum	0.000197327	0	0	0	0	0	0	0	0	0	0	0	0	0	0	0	0	0	0	0	0	0	0	0	0	0	0	0	0	0	0	0	0	0	0	0
Actinobacteriota	Actinobacteria	Corynebacteriales	Corynebacteriaceae	Corynebacterium	Corynebacterium_renale	0	0	0	0	0	0.000463312	0	0	0	0	0	0	0	0	0	0	0	0	0	0	0	0	0	0	0	0	0	0	0	4.42511e-05	0	0	0	0	0	0
Actinobacteriota	Actinobacteria	Corynebacteriales	Corynebacteriaceae	Corynebacterium	Corynebacterium_sp._P147607UB03	2.63103e-05	0	0	0	0	0	0	0	0	0	0	0	0	0	0	0	0	0	0	0	0	0	0	0	0	0	0	0	0	0	0	0	0	0	0	0
Actinobacteriota	Actinobacteria	Corynebacteriales	Corynebacteriaceae	Corynebacterium	Corynebacterium_stationis	0.0259945	0.00160872	0.00297659	0.000808875	0	0.00117814	0	0	0	0.000411896	0	0	0	0.000556306	0	0	0.000624584	0	0	0	0	0	0	0	0	0	2.9077e-05	0	0	0	0	0	0	0	0	0
Actinobacteriota	Actinobacteria	Corynebacteriales	Corynebacteriaceae	Corynebacterium	Corynebacterium_testudinoris	0	0	0	0	0	0	0	0	0	0	0	0	0	0	0.000427186	0	0	0	0	0	0	0	0	0	0	0	0	0	0	0	0	0	0	0	0	0
Actinobacteriota	Actinobacteria	Corynebacteriales	Corynebacteriaceae	Corynebacterium	Corynebacterium_urealyticum	0	0	0	0	0	0	0	0	0	0	0	0	0	0	0	0	0	0	0	0	0	0	0	0	0	0	0	0	0	0	0	0	0	2.98187e-05	0	0
Actinobacteriota	Actinobacteria	Corynebacteriales	Corynebacteriaceae	Corynebacterium	Corynebacterium_variabile	0.00359135	0.00103703	0.00214529	0.00409573	0	0.000926625	0	0	0	0	0	0	0	0	0	0	0	0	0	0	0	0.000584146	0.00224432	0	0	0	0	0	0	0	0	0	0	0	0	0
Actinobacteriota	Actinobacteria	Corynebacteriales	Corynebacteriaceae	Corynebacterium	unclassified_Corynebacterium	0.0740765	0.00437413	0.0046526	0.00810158	0.000416428	0.00292549	0	4.00416e-05	6.6248e-05	0.00308922	0	0	0.000760425	0.00105963	0.000606328	0.000397985	0.000434493	0.000513361	0.00247694	0.000173594	0.00015971	5.84146e-05	0.00123363	0.00106778	4.52523e-05	0.000102188	0	3.03017e-05	0	0	2.89448e-05	5.87199e-05	7.29235e-05	0	0	3.02485e-05
Actinobacteriota	Actinobacteria	Corynebacteriales	Corynebacteriales_Incertae_Sedis	Tomitella	unclassified_Tomitella	0	0	0	0	0	0	0	0	0	0	0	0	0	0	0	0	0	0	0	0	0	0	0	0	0	5.83933e-05	0	0	0	0	0	0	0	0	0	0
Actinobacteriota	Actinobacteria	Corynebacteriales	Dietziaceae	Dietzia	unclassified_Dietzia	0.0135103	0.000132952	0.00048269	0.0003595	0.00011712	0.000145612	0	0	0	0.00178488	0	0	0	0	0.000165362	0.000164684	0.000190091	0	0	0	4.35572e-05	0	0	0	3.01682e-05	0	0	0	0	0	0	0	0	0	0	0
Actinobacteriota	Actinobacteria	Corynebacteriales	Mycobacteriaceae	Mycobacterium	unclassified_Mycobacterium	0	0	0	0	0	0	5.37158e-05	0	0	9.6109e-05	0	0	0	0	0	0	0	0	0	0	0	0	0	0	0	0	0	0	0	0	0	0	0	0	0	0
Actinobacteriota	Actinobacteria	Corynebacteriales	Nocardiaceae	Rhodococcus	Rhodococcus_coprophilus	0	0	0	0	0	0	0	0	0	0.000178488	0	0	0	0	0	0	0	0	0	0	0	0	0	0	0	0	0	0	0	0	0	0	0	0	0	0
Actinobacteriota	Actinobacteria	Corynebacteriales	Nocardiaceae	Rhodococcus	unclassified_Rhodococcus	0.000473585	0	0	0	0	0	0	0	0	0	0	0	0	0	0	0	0	0	0	0	0	0	0	0	0	0	0	0	0	0	0	0	0	0	0	0
Actinobacteriota	Actinobacteria	Corynebacteriales	Nocardiaceae	unclassified_Nocardiaceae	unclassified_Nocardiaceae	0	0	0	0	0	0	0	0	0	0	0	0	0	0	4.13405e-05	0	0	0	0	0	0	0	0	0	0	0	0	0	0	0	0	0	0	0	0	0
Actinobacteriota	Actinobacteria	Corynebacteriales	unclassified_Corynebacteriales	unclassified_Corynebacteriales	unclassified_Corynebacteriales	0	0	0	0	0	0	0	0	0	2.74597e-05	0	0	0	2.64908e-05	0	0	4.07338e-05	0	0	0	0	0	0	0	0	0	0	0	0	0	0	0	0	0	0	0
Actinobacteriota	Actinobacteria	Frankiales	Acidothermaceae	Acidothermus	unclassified_Acidothermus	0	0	0	0	0	0	0	0	0	0	0	0	0	0	0	0	0	0	0	0	0	0	0	0	0	0	0	0	0	0	0	0	0	0	0	0
Actinobacteriota	Actinobacteria	Frankiales	Frankiaceae	Frankia	unclassified_Frankia	0	0	0	0	0	0	0	0	0	0	0	0	0	0	0	0	0	0	0	0	0	0	0	0	0	0	0	0	0	0	0	0	0	0	0	0
Actinobacteriota	Actinobacteria	Frankiales	Frankiaceae	Jatrophihabitans	unclassified_Jatrophihabitans	0	0	0	0	0	0	0	0	0	0	0	0	0	0	0	0	0	0	0	0	0	0	0	0	0	0	0	0	0	0	0	0	0	0	0	0
Actinobacteriota	Actinobacteria	Frankiales	Geodermatophilaceae	Blastococcus	unclassified_Blastococcus	0	0	0	0	0	0	0	0	0	0.000288327	0	0	0	0	0	0	4.07338e-05	0	0	0	0	0	0	0	0	0	0	0	0	0	0	0	0	0	0	0
Actinobacteriota	Actinobacteria	Frankiales	Geodermatophilaceae	Klenkia	unclassified_Klenkia	0	0	0	0	0	0	0	0	0	2.74597e-05	0	0	0	0	0	0	0	0	0	0	0	0	0	0	0	0	0	0	0	0	0	0	0	0	0	0
Actinobacteriota	Actinobacteria	Frankiales	Nakamurellaceae	Nakamurella	Nakamurella_multipartita	0	0	0	0	0	0	0	0	0	0	0	0	0	0	0	0	0	0	0	0	0	0	0	0	0	0	0	0	0	0	0	0	0	0	0	0
Actinobacteriota	Actinobacteria	Frankiales	Nakamurellaceae	Nakamurella	unclassified_Nakamurella	0	0	0	0	0	0	0	0	0	0	0	0	0	0	0	0	0	0	0	0	0	0	0	0	0	0	0	0	0	0	0	0	0	0	0	0
Actinobacteriota	Actinobacteria	Frankiales	Nakamurellaceae	Nakamurella	uncultured_Nakamurellaceae_bacterium	0	0	0	0	0	0	0	0	0	4.11896e-05	0	0	0	0	0	0	0	0	0	0	0	0	0	0	0	0	0	0	0	0	0	0	0	0	0	0
Actinobacteriota	Actinobacteria	Frankiales	Sporichthyaceae	Sporichthya	Sporichthya_polymorpha	0	0	0	0	0	0	0	0	0	0	0	0	0	0	0	0	0	0	0	0	0	0	0	0	0	0	0	0	0	0	0	0	0	0	0	0
Actinobacteriota	Actinobacteria	Frankiales	Sporichthyaceae	hgcI_clade	unclassified_hgcI_clade	0	0	0	0	0	0	0	0	0	0	0	0	0	0	0	0	0	0	0	0	0	0	0	0	0	0	0	0	0	0	0	0	0	0	0	0
Actinobacteriota	Actinobacteria	Frankiales	Sporichthyaceae	unclassified_Sporichthyaceae	unclassified_Sporichthyaceae	0	0	0	0	0	0	0	0	0	0	0	0	0	0	0	0	0	0	0	0	0	0	0	0	0	0	0	0	0	0	0	0	1.45847e-05	0	0	1.51242e-05
Actinobacteriota	Actinobacteria	Frankiales	unclassified_Frankiales	unclassified_Frankiales	unclassified_Frankiales	0	0	0	0	0	0	0	0	0	0	0	0	0	0	0	0	0	0	0	0	0	0	0	0	0	0	0	0	0	0	0	0	0	0	0	0
Actinobacteriota	Actinobacteria	Kineosporiales	Kineosporiaceae	unclassified_Kineosporiaceae	unclassified_Kineosporiaceae	0	0	0	0	0	0	0	0	0	0	0	0	0	0	0	0	0	0	0	0	0	0	0	0	0	0	0	0	0	0	0	0	0	0	0	0
Actinobacteriota	Actinobacteria	Micrococcales	Brevibacteriaceae	Brevibacterium	unclassified_Brevibacterium	0.00131551	7.97713e-05	6.70403e-05	0	0	7.9425e-05	0	0	0	8.23791e-05	0	5.64366e-05	0	2.64908e-05	0	0	8.14675e-05	0	0	0	0	0	0	1.50392e-05	0	0	0	0	0	0	0	0	0	0	0	0
Actinobacteriota	Actinobacteria	Micrococcales	Cellulomonadaceae	Cellulomonas	unclassified_Cellulomonas	0.000210482	0	0	0	0	0	0	0	0	0	0	0	0	0	0	0	0	0	0	0	0	0	0	0	0	0	0	0	0	0	0	0	0	0	0	0
Actinobacteriota	Actinobacteria	Micrococcales	Cellulomonadaceae	unclassified_Cellulomonadaceae	unclassified_Cellulomonadaceae	0	0	0	0	0	0	0	0	0	0	0	0	0	0	0	0	0	0	0	0	0	0	0	0	0	0	0	0	0	0	0	0	0	0	0	0
Actinobacteriota	Actinobacteria	Micrococcales	Demequinaceae	Demequina	unclassified_Demequina	0	0	0	0	0	0	0	0	0	0	0	0	0	0	0	0	0	0	0	0	0	0	0	0	0	0	0	0	0	0	0	0	0	0	0	0
Actinobacteriota	Actinobacteria	Micrococcales	Demequinaceae	unclassified_Demequinaceae	unclassified_Demequinaceae	0	0	0	0	0	0	0	0	0	0	0	0	0	0	0	0	0	0	0	0	0	0	0	0	0	0	0	0	0	0	0	0	0	0	0	3.02485e-05
Actinobacteriota	Actinobacteria	Micrococcales	Dermabacteraceae	Brachybacterium	unclassified_Brachybacterium	0	0.000265904	0	0	0	0	0	0	0	0.000260867	0	0	0	0	0	0	0	0	0	0	0	0	0	0	0	0	0	0	0	0	0	0	0	0	0	0
Actinobacteriota	Actinobacteria	Micrococcales	Dermatophilaceae	Tonsilliphilus	Tonsilliphilus_suis	0	0	0	0.000205428	0	0	4.02868e-05	0	7.94976e-05	0.000219678	0	0	0	0.000119208	0	0.000178407	0	0	0	0	0	0	0	0	0	0	0	0	0	0	0	0	0	0	0	0
Actinobacteriota	Actinobacteria	Micrococcales	Dermatophilaceae	unclassified_Dermatophilaceae	unclassified_Dermatophilaceae	0	0	0	0	0	0	0	0	0	6.86493e-05	0	0	0	0	6.89009e-05	0	0	0	0	0	0	0	0	0	0	0	0	0	0	0	0	0	0	0	0	0
Actinobacteriota	Actinobacteria	Micrococcales	Intrasporangiaceae	Ornithinimicrobium	unclassified_Ornithinimicrobium	0	0	0	0	0	0	0	0	0	0.000178488	0	0	0	0	0	0	0	0	0	0	0	0	0	0	0	0	0	0	0	0	0	0	0	0	0	0
Actinobacteriota	Actinobacteria	Micrococcales	Intrasporangiaceae	Terrabacter	unclassified_Terrabacter	0	0	0	0	0	0	0	0	0	0	0	0	0	0	0	0	0	0	0	0	0	0	0	0	0	0	0	0	0	0	0	0	0	0	0	0
Actinobacteriota	Actinobacteria	Micrococcales	Intrasporangiaceae	unclassified_Intrasporangiaceae	unclassified_Intrasporangiaceae	0	0	0	0	0	0.0001059	0	0	0	0.000219678	0	0	0	0	2.75604e-05	0	0	0	0	0	0	0	0	0	0	0	0	0	0	0	0	0	0	0	0	0
Actinobacteriota	Actinobacteria	Micrococcales	Microbacteriaceae	Agromyces	Agromyces_neolithicus	0	0	0	0	0	0	2.68579e-05	0	0	0	0	0	0	0	0	0	0	0	0	0	0	0	0	0	0	0	0	0	0	0	0	0	0	0	0	0
Actinobacteriota	Actinobacteria	Micrococcales	Microbacteriaceae	Agromyces	unclassified_Agromyces	0	0	0	0	0	0	0	0	0	2.74597e-05	0	0	0	0	0	0	0	0	0	0	0	0	0	0	0	0	0	0	0	0	0	0	0	0	0	0
Actinobacteriota	Actinobacteria	Micrococcales	Microbacteriaceae	Leucobacter	unclassified_Leucobacter	0.00239423	0.000252609	0.000281569	0.000320982	0	0	0	0	0	0	0	0	0	0.000198681	0	0	0	0	8.74215e-05	0	0	0	0	0	0	0	0	4.54525e-05	0	0	0	0	0	0	0	0
Actinobacteriota	Actinobacteria	Micrococcales	Microbacteriaceae	Microbacterium	unclassified_Microbacterium	0.00139444	5.31809e-05	0	0	0	9.26625e-05	0	0	0	0	0	0	0	0	0	0	0	0	0	0	0	0	0	0	0	0	0	0	0	0	0	0	0	0	0	0
Actinobacteriota	Actinobacteria	Micrococcales	Microbacteriaceae	unclassified_Microbacteriaceae	unclassified_Microbacteriaceae	0.00105241	0.000119657	0.000174305	0.000166911	0.000416428	7.9425e-05	0	0	0	0.0011945	0	2.82183e-05	1.3579e-05	0	0.000316944	0.00015096	0.000339448	0	0	0	0	0	0	0	0	0	0	0	0	0	0	0	0	0	4.40969e-05	0
Actinobacteriota	Actinobacteria	Micrococcales	Micrococcaceae	Enteractinococcus	unclassified_Enteractinococcus	0	0	0	0	0	0	0	0	0	0	0	0	0	0	2.75604e-05	0	0	0	0	0	0	0	0	0	0	0	0	0	0	0	0	0	0	0	0	0
Actinobacteriota	Actinobacteria	Micrococcales	Micrococcaceae	Kocuria	unclassified_Kocuria	0	0	0	0	0	0.000119137	0	0	0	0.000755142	0	0	0	0.000158945	0	0	0	0	0	0	0	0	0	0	0	0	0	0	0	0	0	0	0	0	0	0
Actinobacteriota	Actinobacteria	Micrococcales	Micrococcaceae	Rothia	Rothia_mucilaginosa	0.000289413	0	0	0	0	0	0	0	0	0	0	0	0	0	0	0	0	0	0	0	0	0	0	0	0	0	0	0	0	0	0	0	0	0	0	0
Actinobacteriota	Actinobacteria	Micrococcales	Micrococcaceae	Rothia	unclassified_Rothia	0.00151284	0.0013827	6.70403e-05	0.00118121	0.000325334	0.000383887	0.00209492	0	0	0.00089244	7.77142e-05	1.41091e-05	0.00013579	0	0.000220483	0.00332112	0.000149357	0.00225089	0	0	0	0	0	0	0	0	0	0	1.50053e-05	1.47504e-05	0	0	0	0	0	0
Actinobacteriota	Actinobacteria	Micrococcales	Micrococcaceae	unclassified_Micrococcaceae	unclassified_Micrococcaceae	0	0	0	0	0	3.97125e-05	0	0	0	0.000755142	0	0	6.78951e-05	0	0	8.23418e-05	0	0	0	0	0	0	0	0	0	0	0	0	0	0	0	0	0	0	0	0
Actinobacteriota	Actinobacteria	Micrococcales	Promicromonosporaceae	unclassified_Promicromonosporaceae	unclassified_Promicromonosporaceae	0	0	5.36322e-05	0	0	0	0	0	0	0	0	0	0	0	0	0	0	0	0	0	0	0	0	0	0	0	0	0	0	0	0	0	0	0	0	0
Actinobacteriota	Actinobacteria	Micrococcales	Sanguibacteraceae	Sanguibacter_Flavimobilis	unclassified_Sanguibacter_Flavimobilis	0	0	0	0	0	0	0	0	0	0	0	0	0	2.64908e-05	0	0	0	0	0	0	0	0	0	0	0	0	0	0	0	0	0	0	0	0	0	0
Actinobacteriota	Actinobacteria	Micrococcales	unclassified_Micrococcales	unclassified_Micrococcales	unclassified_Micrococcales	0	0	0	0	0.000182187	0.000185325	8.05737e-05	0	0	0.000343246	0	0	0	0	0	0	0	0	0	0	0	0	0	0	0	0	0	0	0	0	0	0	0	0	0	0
Actinobacteriota	Actinobacteria	Micromonosporales	Micromonosporaceae	Hamadaea	unclassified_Hamadaea	0	0	0	0	0	0	0	0	0	0	0	0	0	0	0	0	0	0	0	0	0	0	0	0	0	0	0	0	0	0	0	0	0	0	0	0
Actinobacteriota	Actinobacteria	Micromonosporales	Micromonosporaceae	Micromonospora	unclassified_Micromonospora	0	0	0	0	0	0	0	0	0	0	0	0	0	0	0	0	0	0	0	0	0	0	0	0	0	0	0	0	0	0	0	0	0	0	0	0
Actinobacteriota	Actinobacteria	Micromonosporales	Micromonosporaceae	unclassified_Micromonosporaceae	unclassified_Micromonosporaceae	0	0	0	0	0	0	0	0	0	0.000205948	0	0	0	0	4.13405e-05	0	0	0	0	0	0	0	0	0	0	0	0	0	0	0	0	0	0	0	0	3.02485e-05
Actinobacteriota	Actinobacteria	Nitriliruptorales	Nitriliruptoraceae	Nitriliruptor	Nitriliruptor_sp.	0	0	0	0	0	0	0	0	0	0	0	0	0	0	4.13405e-05	0	4.07338e-05	0	0	0	0	0	0	0	0	0	0	0	0	0	0	0	0	0	0	0
Actinobacteriota	Actinobacteria	Nitriliruptorales	Nitriliruptoraceae	Nitriliruptor	unclassified_Nitriliruptor	0	0	0	0	0	0	0	0	0	0	0	0	0	0	0	0	0	0	0	0	0	0	0	0	0	0	0	0	0	0	0	0	0	0	0	0
Actinobacteriota	Actinobacteria	Nitriliruptorales	Nitriliruptoraceae	unclassified_Nitriliruptoraceae	unclassified_Nitriliruptoraceae	0.000236792	0	1.34081e-05	0	0	0	0	1.33472e-05	0	0	0	0	0	0	0	0	0	0	0	0	0	0	0	0	0	0	0	0	0	0	0	0	0	0	0	0
Actinobacteriota	Actinobacteria	PeM15	uncultured_Actinomycetales_bacterium	uncultured_Actinomycetales_bacterium	uncultured_Actinomycetales_bacterium	0	0	0	0	0	0	0	0	0	0	0	0	0	0	0	0	0	0	0	0	0	0	0	0	0	0	0	0	0	0	0	0	0	0	0	0
Actinobacteriota	Actinobacteria	Propionibacteriales	Nocardioidaceae	Aeromicrobium	unclassified_Aeromicrobium	0	0	0	0	2.60268e-05	0	0	0	0	0.000219678	0	0	0	0	5.51207e-05	0	6.78896e-05	0	0	0	0	0	0	0	0	0	0	0	0	0	0	0	0	0	0	0
Actinobacteriota	Actinobacteria	Propionibacteriales	Nocardioidaceae	Marmoricola	unclassified_Marmoricola	0	0	0	0	0	0	0	0	0	0	0	0	0	0	0	0	0	0	0	0	0	0	0	0	0	0	0	0	0	0	0	0	0	0	0	0
Actinobacteriota	Actinobacteria	Propionibacteriales	Nocardioidaceae	Nocardioides	Nocardioides_dilutus	0	0	0	0	0	0	0	0	0	0	0	0	0	0	0	0	0	0	0	0	0	0	0	0	0	0	0	0	0	0	0	0	0	0	0	0
Actinobacteriota	Actinobacteria	Propionibacteriales	Nocardioidaceae	Nocardioides	Nocardioides_gilvus	0	0	0	0	0	0	0	0	0	5.49194e-05	0	0	0	0	0	0	0	0	0	0	0	0	0	0	0	0	0	0	0	0	0	0	0	0	0	0
Actinobacteriota	Actinobacteria	Propionibacteriales	Nocardioidaceae	Nocardioides	Nocardioides_halotolerans	0	0	0	0	0	0	0	0	0	0	0	0	0	0	0	0	0	0	0	0	0	0	0	0	0	0	0	0	0	0	0	0	0	0	0	0
Actinobacteriota	Actinobacteria	Propionibacteriales	Nocardioidaceae	Nocardioides	unclassified_Nocardioides	0	0	0	0	0	2.6475e-05	0	0	0	2.74597e-05	0	0	0	0	0	0	5.43117e-05	0	0	0	0	0	0	0	0	0	0	0	0	0	0	0	0	0	0	0
Actinobacteriota	Actinobacteria	Propionibacteriales	Nocardioidaceae	unclassified_Nocardioidaceae	unclassified_Nocardioidaceae	0	0	0	0	0	0	0	0	0	0	0	0	0	0	0	0	0	0	0	0	0	0	0	0	0	0	0	0	0	0	0	0	0	0	0	0
Actinobacteriota	Actinobacteria	Propionibacteriales	Propionibacteriaceae	Acidipropionibacterium	Acidipropionibacterium_acidipropionici	0	0	0	0.000372339	0	0	0	0	0	0	0	0	0	0	0	0	0	0	0	0	0	0	0	0	0	0	0	0	0	0	0	0	0	0	0	0
Actinobacteriota	Actinobacteria	Propionibacteriales	Propionibacteriaceae	Cutibacterium	unclassified_Cutibacterium	0	3.98857e-05	0	0	0	0	0	0	0	0	0	0	0	0	0	0	0	0	0	0	0	0	0	0	0	0	0	0	0	0	0	0	0	0	0	0
Actinobacteriota	Actinobacteria	Propionibacteriales	Propionibacteriaceae	Microlunatus	unclassified_Microlunatus	0	0	0	2.56786e-05	0	0	0	0	0	0	0	0	0	0	0	0	0	0	0	0	0	0	0	0	0	0	0	0	0	0	0	0	0	0	0	0
Actinobacteriota	Actinobacteria	Propionibacteriales	Propionibacteriaceae	Propionibacterium	unclassified_Propionibacterium	0	0.000531809	0.000174305	0.000269625	1.30134e-05	9.26625e-05	0	0	0	0	0	0	0	0	1.37802e-05	0	0	0	0	0	0	0	0	0	0	0	0	0	0	0	0	0	0	0	0	0
Actinobacteriota	Actinobacteria	Propionibacteriales	Propionibacteriaceae	Pseudopropionibacterium	unclassified_Pseudopropionibacterium	0	0	0	0.00017975	1.30134e-05	2.6475e-05	0	1.33472e-05	0	0	0	0	0	1.32454e-05	0	0	0	0	0	0	0	0	0	0	0	0	0	0	0	0	0	0	0	0	0	0
Actinobacteriota	Actinobacteria	Propionibacteriales	Propionibacteriaceae	Tessaracoccus	unclassified_Tessaracoccus	0	0	0	0	0	0	0	0	0	0	0	0	0	0	0	0	0	2.63262e-05	0	0	0	0	0	0	0	0	0	0	0	0	0	0	0	0	0	0
Actinobacteriota	Actinobacteria	Pseudonocardiales	Pseudonocardiaceae	Crossiella	unclassified_Crossiella	0	0	0	0	0	0	0	0	0	0	2.59047e-05	0	0	0	0	0	0	0	0	0	0	0	0	0	0	0	0	0	0	0	0	0	0	0	0	0
Actinobacteriota	Actinobacteria	Pseudonocardiales	Pseudonocardiaceae	Lechevalieria	unclassified_Lechevalieria	0	0	0	0	0	0	0	0	0	0	0	0	0	0	0	0	0	0	0	0	0	0	0	0	0	0	0	0	0	0	0	0	0	0	0	0
Actinobacteriota	Actinobacteria	Pseudonocardiales	Pseudonocardiaceae	Pseudonocardia	unclassified_Pseudonocardia	0	0	0	0	0	2.6475e-05	0	0	0	0	0	0	0	3.97362e-05	0	0	0	0	0	0	0	0	0	0	0	0	0	0	0	0	0	0	0	0	0	0
Actinobacteriota	Actinobacteria	Pseudonocardiales	Pseudonocardiaceae	Saccharopolyspora	unclassified_Saccharopolyspora	0	3.98857e-05	0	0	0	0	0	0	0	0	0	0	0	0	0	0	0	0	0	0	0	0	0	0	0	0	0	0	0	0	0	0	0	0	0	0
Actinobacteriota	Actinobacteria	Pseudonocardiales	Pseudonocardiaceae	unclassified_Pseudonocardiaceae	unclassified_Pseudonocardiaceae	0	0	0	0	0	0	0	0	0	0	0	0	0	0	0	0	0	0	0	0	0	0	0	0	0	0	0	0	0	0	0	0	0	0	0	0
Actinobacteriota	Actinobacteria	Streptomycetales	Streptomycetaceae	Streptomyces	unclassified_Streptomyces	0.000749842	0.000797713	0	0	0	0	0	0	0	0	0	0	0	0	0	0	0	0	0	0	0	1.46037e-05	2.97261e-05	0	0	0	2.9077e-05	0	0	0	0	0	0	0	0	0
Actinobacteriota	Actinobacteria	Streptosporangiales	Nocardiopsaceae	Nocardiopsis	unclassified_Nocardiopsis	0	0.000106362	0	0	0	0	0	0	0	0	0	0	0	0	2.75604e-05	0	0	0	0	0	0	0	0	0	0	0	0	0	0	0	0	0	0	0	0	0
Actinobacteriota	Actinobacteria	unclassified_Actinobacteria	unclassified_Actinobacteria	unclassified_Actinobacteria	unclassified_Actinobacteria	0	0	0	8.98749e-05	2.60268e-05	0	0	0	0	0	0	0	0	0	0	0	0	0	0	0	0	0	0	0	0	0	0	0	0	0	0	0	0	0	0	0
Actinobacteriota	Coriobacteriia	Coriobacteriales	Atopobiaceae	Atopobium	Atopobium_minutum	0	3.98857e-05	0	0.000128393	6.50669e-05	3.97125e-05	0	0	0	4.11896e-05	0	0	4.07371e-05	0	0	0	0	5.26524e-05	0	0	0	0	0	0	0	0	0	0	0	0	0	0	0	0	0	0
Actinobacteriota	Coriobacteriia	Coriobacteriales	Atopobiaceae	Libanicoccus	unclassified_Libanicoccus	0.000736687	0	0	0	0	0	0	0	0	0.000425625	0	0	0	6.62269e-05	0	0	0	0	0.000131132	0	0	0	0	0	0	5.83933e-05	0	0	7.50266e-05	0	0	0.00030828	0	0	0	0
Actinobacteriota	Coriobacteriia	Coriobacteriales	Atopobiaceae	Olsenella	Eubacterium_sp._cL_10_1_3	0	0	0	0	0	0	0	0	0	0	0	0	0	0	0	0	0	0	0.000160273	0	0	0	0	0	0	0	0	0	0	0	0	0	0	0	0	0
Actinobacteriota	Coriobacteriia	Coriobacteriales	Atopobiaceae	Olsenella	Olsenella_congonensis	0	0	2.68161e-05	0	0	5.295e-05	0	0	0	0	0	0	4.07371e-05	0	0	0	0	0	0	0	0	0	0	0	0	0	0	0	0	0	0	0	0	0	0	0
Actinobacteriota	Coriobacteriia	Coriobacteriales	Atopobiaceae	Olsenella	Olsenella_sp._GAM18	0.00149968	0	0	5.13571e-05	0	0	0	0	0	0.00203202	0	0	0	0	0.000509867	0.000109789	0.000162935	0	0.00260807	0.000245924	8.71143e-05	0	0.000431028	0	0.00184026	0.000671523	0.000901386	0.00133327	0.000615218	8.85021e-05	0.000376283	0.000631239	0.000306279	0.000372734	0.000602658	0
Actinobacteriota	Coriobacteriia	Coriobacteriales	Atopobiaceae	Olsenella	Parafannyhessea_umbonata	0	0	0	0.000102714	0	0	0	0	0	0.000151028	0	0	0.000488845	0.0042915	0.000509867	8.23418e-05	0.00241687	0	0	0	0	0	0	0	0	0	0	0	0	0	0	0	0	0	0	0
Actinobacteriota	Coriobacteriia	Coriobacteriales	Atopobiaceae	Olsenella	Tractidigestivibacter_scatoligenes	0	0	0	0	0	0	0	0	0	0	0	0	5.43161e-05	6.62269e-05	0	5.48945e-05	0	0	0	0	0	0	0	0	0	0	0	0	0	0	0	0	0	0	0	0
Actinobacteriota	Coriobacteriia	Coriobacteriales	Atopobiaceae	Olsenella	unclassified_Olsenella	0	0	0	0	0	3.97125e-05	0	0	0	2.74597e-05	2.59047e-05	0	0.00101843	0.0025696	0.000895712	5.48945e-05	0.00217247	2.63262e-05	0	0	0	0	0	0	3.01682e-05	0	0	0	0	0	0.000709148	0	0	0	0	0
Actinobacteriota	Coriobacteriia	Coriobacteriales	Atopobiaceae	unclassified_Atopobiaceae	unclassified_Atopobiaceae	0.000381499	0.000132952	2.68161e-05	0.000166911	0.00011712	0.000383887	9.40026e-05	0	0	0.011382	0	1.41091e-05	0	0.00034438	0.00169496	0.000274473	0.000665318	0	0.000641091	0.000520781	0.000246824	0.000379695	0.000802604	0.000421097	0.000648616	0.000890498	0.000625154	0.00054543	0.00022508	0.000560513	0.000376283	0.0002202	0.00049588	0.000715649	0.000249882	0.000287361
Actinobacteriota	Coriobacteriia	Coriobacteriales	Coriobacteriaceae	Collinsella	Collinsella_provencensis	0	0	0	0	0	0	0	0	0	0	0	0	0	0	0	0	0	0	0	0	0	0	0	0	0	0	0	0	0	0	0	0	0	0	0	3.02485e-05
Actinobacteriota	Coriobacteriia	Coriobacteriales	Coriobacteriaceae	Collinsella	unclassified_Collinsella	0.000618291	9.30665e-05	0.000388834	0.00017975	6.50669e-05	0.000304462	0.000107432	0	0	0.00417387	0	0	0.000149369	0.000410607	0.00103351	0.000397985	0.000461649	0	0.00319088	0.000159127	0	0.000116829	0.000505343	0	0.00164417	0.000817506	0.00127939	0.00139388	0.00045016	5.90014e-05	0.000303921	0.00237816	0.000131262	0.000193822	0.000543862	0.000120994
Actinobacteriota	Coriobacteriia	Coriobacteriales	Eggerthellaceae	DNF00809	Berryella_intestinalis	0	0	0	0	0	0	0	0	0	0	0	0	0	0	0	6.86182e-05	0	0	0	0	0	0	0	0	0	0	0	0	0	0	0	0	0	0	0	0
Actinobacteriota	Coriobacteriia	Coriobacteriales	Eggerthellaceae	Denitrobacterium	Eggerthellaceae_bacterium_AT8	0	0	0	0	0	0	0	0	0	0	0	0	0	0	2.75604e-05	0	6.78896e-05	0	0	0	0	0	0	0	0	0	0	0	0	0	0	0	0	0	0	0
Actinobacteriota	Coriobacteriia	Coriobacteriales	Eggerthellaceae	Enterorhabdus	unclassified_Enterorhabdus	0.00131551	0.000146247	0.000281569	0.000154071	5.20535e-05	0.000463312	0	0	0	0.00315787	0	0	0.00013579	0.000357625	0.00111619	0.000137236	0.000678896	0	0.00152988	2.89323e-05	0	5.84146e-05	0.000356713	0.000105274	0.000226261	0.000642326	0.00158469	0.000227262	0.000120043	4.42511e-05	0.000130252	0.00010276	0.000189601	4.47281e-05	0.000485066	7.56212e-05
Actinobacteriota	Coriobacteriia	Coriobacteriales	Eggerthellaceae	Gordonibacter	unclassified_Gordonibacter	0.000276258	0	0	0	0	0	0	0	0	0	0	0	0	0	0	0	0	0	0	0	0	0	0	0	0	0	0	0	0	0	0	0	0	0	0	0
Actinobacteriota	Coriobacteriia	Coriobacteriales	Eggerthellaceae	Paraeggerthella	unclassified_Paraeggerthella	0	0	0	0	0	0	0	0	0	4.11896e-05	0	0	0	0	0	0	0	0	0	0	0	0	0	0	0	0	0	0	0	0	0	0	0	0	0	0
Actinobacteriota	Coriobacteriia	Coriobacteriales	Eggerthellaceae	Senegalimassilia	unclassified_Senegalimassilia	0	0	0	0	2.60268e-05	0	0	0	0	0	0	0	0	0	0	0	0	0	0	0	0	0	0	0	0	0	4.36154e-05	0.000303017	0	0	0	0	0	0	0	0
Actinobacteriota	Coriobacteriia	Coriobacteriales	Eggerthellaceae	Slackia	Slackia_isoflavoniconvertens	2.63103e-05	0	0	3.85178e-05	0	0	0	0	0	0.000205948	0	0	0	0	1.37802e-05	5.48945e-05	0	0	0.000203984	0	0	0	0.000133767	0	0.000316766	0	2.9077e-05	7.57541e-05	3.00107e-05	0	0	0.000440399	0	0	0	0
Actinobacteriota	Coriobacteriia	Coriobacteriales	Eggerthellaceae	Slackia	unclassified_Slackia	0	0	0	0	0	0	0	0	0	2.74597e-05	0	0	2.7158e-05	0	0	0	0	0	0	0	0	0	0	0	0	0	0	0	0	0	0	0	0	0	0	0
Actinobacteriota	Coriobacteriia	Coriobacteriales	Eggerthellaceae	unclassified_Eggerthellaceae	unclassified_Eggerthellaceae	0.00132867	0.000332381	0.000402242	0.000128393	0.000182187	0.00329614	0.000228292	0	0	0.028613	0	0	0	0.00190734	0.0136975	0.00204482	0.00696547	0	0.00100535	0.00063651	0.00111797	0.00163561	0.00083233	0.000751959	0.000497775	0.00141604	0.000421616	0.000772692	0.000555197	0.000486762	0.000289448	0.000675279	0.000597973	0.00068583	0.000514464	0.000922579
Actinobacteriota	Coriobacteriia	Coriobacteriales	unclassified_Coriobacteriales	unclassified_Coriobacteriales	unclassified_Coriobacteriales	0.000197327	7.97713e-05	6.70403e-05	0	2.60268e-05	0.0005295	2.68579e-05	0	0	0.00164758	0	0	0	0	0.00150204	0.00015096	0.00118128	0	0.000131132	0.00164914	0.0028167	0.00429348	0.000891782	0.00233107	0	0.000379557	0.000145385	0.000409072	0.00178563	0.00244856	0.000636786	0.0026424	0.00163349	0.000984017	0.001367	0.00245013
Actinobacteriota	Thermoleophilia	Gaiellales	Gaiellaceae	Gaiella	unclassified_Gaiella	0	0	0	0	0	0	0	0	0	0	0	0	0	0	4.13405e-05	0	0	0	0	0	0	0	0	0	0	0	0	0	0	0	0	0	0	0	0	0
Actinobacteriota	Thermoleophilia	Gaiellales	unclassified_Gaiellales	unclassified_Gaiellales	unclassified_Gaiellales	0	0	0	5.13571e-05	0	0	0	0	0	0	2.59047e-05	0	0	0	0	0	0	0	0	0	0	0	0	0	0	0	0	0	0	0	0	0	0	0	0	0
Actinobacteriota	Thermoleophilia	Solirubrobacterales	67_14	unclassified_67_14	unclassified_67_14	0	2.65904e-05	0	0	0	2.6475e-05	0	0	0	5.49194e-05	0	0	0	0	0	0	0	0	0	0	0	0	0	0	0	0	0	0	0	0	0	0	0	0	0	0
Actinobacteriota	Thermoleophilia	Solirubrobacterales	67_14	uncultured_Rubrobacteria_bacterium	uncultured_Rubrobacteria_bacterium	0	0	0	0	2.60268e-05	0	0	0	0	0	0	0	0	0	0	0	0	0	0	0	0	0	0	0	0	0	0	0	0	0	0	0	0	0	0	0
Actinobacteriota	Thermoleophilia	Solirubrobacterales	67_14	uncultured_actinobacterium	uncultured_actinobacterium	0	0	0	0	0	0	0	0	0	6.86493e-05	0	0	0	0	0	0	0	0	0	0	0	0	0	0	0	0	0	0	0	0	0	0	0	0	0	0
Actinobacteriota	Thermoleophilia	Solirubrobacterales	Solirubrobacteraceae	Conexibacter	Baekduia_soli	0	0	0	0	0	0	0	0	0	0	0	0	0	0	0	0	0	0	0	0	0	0	0	0	0	0	0	0	0	0	0	0	0	0	0	0
Actinobacteriota	Thermoleophilia	Solirubrobacterales	Solirubrobacteraceae	Conexibacter	Conexibacter_sp.	0	0	0	0	0	0	0	0	0	0	0	0	0	0	0	0	0	0	0	0	0	0	0	0	0	0	0	0	0	0	0	0	0	0	0	0
Actinobacteriota	Thermoleophilia	Solirubrobacterales	Solirubrobacteraceae	Solirubrobacter	unclassified_Solirubrobacter	0	0	0	0	0	0	0	0	0	4.11896e-05	0	0	0	0	0	0	0	0	0	0	0	0	0	0	0	0	0	0	0	0	0	0	0	0	0	0
Actinobacteriota	Thermoleophilia	Solirubrobacterales	Solirubrobacteraceae	unclassified_Solirubrobacteraceae	uncultured_Conexibacteraceae_bacterium	0	0	0	0	0	0	0	0	0	0	0	0	0	0	0	0	0	0	0	0	0	0	0	0	0	0	0	0	0	0	0	0	0	0	0	0
Actinobacteriota	unclassified_Actinobacteriota	unclassified_Actinobacteriota	unclassified_Actinobacteriota	unclassified_Actinobacteriota	unclassified_Actinobacteriota	0	0	0	0	0	0	0	0	0	0	0	0	0	0	0	0	0	0	0	0	0	0	0	0	0	0	0	0	0	0	0	0	0	0	0	0
Armatimonadota	Chthonomonadetes	Chthonomonadales	Chthonomonadaceae	Chthonomonas	unclassified_Chthonomonas	0	0	0	0	0	0	0	0	0	0	0	0	0	0	0	0	0	0	0	0	0	0	0	0	0	0	0	0	0	0	0	0	0	0	0	0
Armatimonadota	Fimbriimonadia	Fimbriimonadales	Fimbriimonadaceae	unclassified_Fimbriimonadaceae	unclassified_Fimbriimonadaceae	0	0	0	0	0	0	0	0	0	0	0	0	0	0	0	0	0	0	0	0	0	0	0	0	0	0	0	0	0	0	0	0	0	0	0	0
Bacteroidota	Bacteroidia	Bacteroidales	Bacteroidaceae	Bacteroides	Bacteroidaceae_bacterium_DJF_B220	0	0	0	0	0	0	0	0	0	0	0	0	0	0	0	0	0	0	0	0	0	0	0	0	0	0.000452548	5.81539e-05	9.0905e-05	0	0	2.89448e-05	4.40399e-05	0	0	2.93979e-05	0
Bacteroidota	Bacteroidia	Bacteroidales	Bacteroidaceae	Bacteroides	Bacteroides_caecigallinarum	0	0	0	0	0	0	0	0	0	0	0	0	0	0	0	0	0	0	0	2.89323e-05	0	0	0	0.000240627	0	0	0.000436154	0.000106056	6.00213e-05	0.000118003	0	0.000689959	0	0	0	0
Bacteroidota	Bacteroidia	Bacteroidales	Bacteroidaceae	Bacteroides	Bacteroides_caecimuris	0	0	0	0	0	0	0	0	0	0	0	0	0	0	0	0	0	0	0	0	0	0	0	0	0	0	0	0	0	0	0	0	0	0	0	0
Bacteroidota	Bacteroidia	Bacteroidales	Bacteroidaceae	Bacteroides	Bacteroides_coprocola	0	0	0	0	0	0	0	0	0	0	0	0	0	0	0	0	0	0	0	0	0	0	0	0	0	0	0	0	0	0	0	2.936e-05	0	0	0	0
Bacteroidota	Bacteroidia	Bacteroidales	Bacteroidaceae	Bacteroides	Bacteroides_coprophilus	0	0	0	0	0	0	0	0	0	0	0	0	0	0	0	0	0	0	0	0	0	0	0	0	0	0	0	3.03017e-05	0	0	0	0	0	0	0	0
Bacteroidota	Bacteroidia	Bacteroidales	Bacteroidaceae	Bacteroides	Bacteroides_coprosuis	6.57756e-05	2.65904e-05	0	2.56786e-05	0	0.00305786	0	0	0	0	0	0	2.7158e-05	0	0	0	0	0	0	0	0	0	0	0	0	0	0	0	0	0	0	0	0	0	0	0
Bacteroidota	Bacteroidia	Bacteroidales	Bacteroidaceae	Bacteroides	Bacteroides_fragilis	0	0	1.34081e-05	0	0	0	0	0	0	0	0	0	1.3579e-05	0	2.75604e-05	0	0	0	0	0	0	0	1.4863e-05	0	0	0	0	0	0	0	1.44724e-05	0	0	0	0	0
Bacteroidota	Bacteroidia	Bacteroidales	Bacteroidaceae	Bacteroides	Bacteroides_heparinolyticus	0	0	0	0	0	0	0	0	0	0	0	0	0	0	2.75604e-05	0	0	0	0	0	0	0	0	0	0	0	0	0	0	0	0	0	0	0	0	0
Bacteroidota	Bacteroidia	Bacteroidales	Bacteroidaceae	Bacteroides	Bacteroides_sp._Marseille_P3166	0	0	0	0	0	0	0	0	0	0	0	0	0	0	0	0	0.000108623	0	0.000364256	0	0	2.92073e-05	0.00118904	3.00784e-05	0.00111622	0.00249631	0.00212262	0.000424223	0.000240085	0	0.000173669	0.000337639	0.000102093	0.000164003	0.000455668	0.000302485
Bacteroidota	Bacteroidia	Bacteroidales	Bacteroidaceae	Bacteroides	Phocaeicola_coprophilus	0	0	0	0	0	0	0	0	0	0	0	0	0	0	0	0	0	0	0	0	0	0	0.000222946	0	0.00137265	0.000145983	0.000799616	0.00210596	4.5016e-05	0	0	0.000998238	2.91694e-05	0	0	0
Bacteroidota	Bacteroidia	Bacteroidales	Bacteroidaceae	Bacteroides	Phocaeicola_plebeius	0	0	0	0	0	0	0	0	0	0	0	0	0	0	0	0	0	0	0	0	0	0	0	0	0	0	8.72309e-05	0	0	0	0	0	0	0	0	0
Bacteroidota	Bacteroidia	Bacteroidales	Bacteroidaceae	Bacteroides	Phocaeicola_sartorii	0	0	0	0	0	0	0	0	0	0	0	0	0	0	0	0	0	0	0	0	0	0	0	0	0	0	0	0	0	0	0	0	0	0	0	0
Bacteroidota	Bacteroidia	Bacteroidales	Bacteroidaceae	Bacteroides	unclassified_Bacteroides	0	0.000319085	0.000214529	0	2.60268e-05	0.0001059	8.05737e-05	0	0	5.49194e-05	1.29524e-05	0	0	0	5.51207e-05	0	0	0	2.91405e-05	0.00406498	0.00136479	0.00644021	8.91782e-05	0.0115501	0	4.3795e-05	5.81539e-05	0	0.000945336	0.010517	0.000694676	4.40399e-05	0.00261066	0.00290732	0.000308678	0.0162434
Bacteroidota	Bacteroidia	Bacteroidales	Bacteroidales_RF16_group	unclassified_Bacteroidales_RF16_group	unclassified_Bacteroidales_RF16_group	0	0	0	0	0	0	0	0	0	1.37299e-05	0	0	0	0	0	0	0	0	1.45703e-05	0.0122239	0.00482033	0.00340265	0.000728289	0.00545922	1.50841e-05	8.759e-05	1.45385e-05	0.000196961	0.00115541	0.0121248	0.00930576	0.00123312	0.0342595	0.0098849	0.0014552	0.00202665
Bacteroidota	Bacteroidia	Bacteroidales	Bacteroidetes_vadinHA17	unclassified_Bacteroidetes_vadinHA17	unclassified_Bacteroidetes_vadinHA17	0	0	0	0	0	0	0	0	0	0	0	0	0	0	0	0	0	0	0	0	0	0	0	0	0	0	0	0	0	0	0	0	0	0	0	0
Bacteroidota	Bacteroidia	Bacteroidales	Barnesiellaceae	unclassified_Barnesiellaceae	unclassified_Barnesiellaceae	0	0	0	0	0	0	0	0	0	0	0	0	0	0	0	0	0	0	0	0	0	0	0	0	0	0	0	0	0	0	0	0	0	0	0	0
Bacteroidota	Bacteroidia	Bacteroidales	Dysgonomonadaceae	Dysgonomonas	Dysgonomonas_sp._HGC4	0	0	2.68161e-05	0	0	0	0	0	0	0	0	0	0	0	0	0	0	0	0	0	0	0	0	0	0	0	0	0	0	0	0	0	0	0	0	0
Bacteroidota	Bacteroidia	Bacteroidales	Dysgonomonadaceae	Dysgonomonas	unclassified_Dysgonomonas	0	0	0	0	0	6.61875e-05	0	0	0	0	0	0	2.7158e-05	0	0	0	0	0	0	0	0	0	0	0	0	0	0	0	0	0	0	0	0	0	0	0
Bacteroidota	Bacteroidia	Bacteroidales	Dysgonomonadaceae	Petrimonas	unclassified_Petrimonas	0	0	2.68161e-05	5.13571e-05	0	0	0	0	0	0	6.47618e-05	0	0	0	0	0	0	0	0	0	0	0	0	0	0	0	0	0	0	0	0	0	0	0	0	0
Bacteroidota	Bacteroidia	Bacteroidales	Dysgonomonadaceae	Proteiniphilum	unclassified_Proteiniphilum	0	0	0	0	3.90401e-05	0	0	0	0	0	0	0	0	0	0	0	0	0	0	0	0	0	0	0	0	0	0	0	0	0	0	0	0	0	0	0
Bacteroidota	Bacteroidia	Bacteroidales	Dysgonomonadaceae	Proteiniphilum	uncultured_Bacteroidales_bacterium	0	0	0	0	0	2.6475e-05	0	0	0	0	0	0	0	0	0	0	0	0	0	0	0	0	0	0	0	0	0	0	0	0	0	0	0	0	0	0
Bacteroidota	Bacteroidia	Bacteroidales	F082	unclassified_F082	unclassified_F082	0	0	9.38564e-05	0	0	0	0	0	0	0	0	0	0	0	0	0	0	0	0	0	0.0269474	0.000175244	0	6.01567e-05	3.01682e-05	0	0	0	0	0	0	0	0	0	0	3.02485e-05
Bacteroidota	Bacteroidia	Bacteroidales	F082	uncultured_rumen_bacterium	uncultured_rumen_bacterium	0	0	0	0	0	0	0	0	0	4.11896e-05	0	0	0	0	0	0	0	0	0	0	0	0	0	0	0	0	0	0	0	0	0	0	0	0	0	0
Bacteroidota	Bacteroidia	Bacteroidales	Marinifilaceae	Butyricimonas	unclassified_Butyricimonas	0	0	0	0	0	0	0	0	0	0	0	0	0	0	0	0	0	0	1.45703e-05	0	1.45191e-05	0	4.45891e-05	3.00784e-05	0	2.91967e-05	1.45385e-05	0	0	7.37518e-05	0	0	0	0	0	0
Bacteroidota	Bacteroidia	Bacteroidales	Marinifilaceae	Odoribacter	unclassified_Odoribacter	0	0	0	0	0	0	0	0	0	0	0	0	0	0	0	0	0	0	0	0	0	0	0	0	0.000226261	0	0	0	0	0	0	0	0	0	0	0
Bacteroidota	Bacteroidia	Bacteroidales	Muribaculaceae	CAG_873	Bacteroidales_bacterium_H4	0	0	0	0	0	0	0	0	0	0	0	0	0	0	0	0	0	0	0	0	0	0	0	0	0	0	0	0	0	0	0	0	0	0	0	0
Bacteroidota	Bacteroidia	Bacteroidales	Muribaculaceae	CAG_873	unclassified_CAG_873	0	0	0	0	0	0	0	0	0	0	0	0	0	0	0	0	0	0	0	0	4.35572e-05	0.000116829	0	6.01567e-05	0	0.000496343	0.000828693	0	0	0	0	0	0	0	0	0
Bacteroidota	Bacteroidia	Bacteroidales	Muribaculaceae	Muribaculum	unclassified_Muribaculum	0	0	0	0	2.60268e-05	0	0	0	0	0	0	0	0	0	0	0	0	0	0	0	0	0	0	0	0	0	0	0	0	0	0	0	0	0	0	0
Bacteroidota	Bacteroidia	Bacteroidales	Muribaculaceae	unclassified_Muribaculaceae	unclassified_Muribaculaceae	0.00124974	0.00237984	0.000630179	5.13571e-05	5.20535e-05	0.000622162	0.000282008	0	2.64992e-05	8.23791e-05	0.000116571	8.46549e-05	0.00013579	0	0.000179142	9.60654e-05	0.000122201	0	0.00314717	0.0285851	0.0287913	0.0202845	0.0107757	0.0292211	0.0143299	0.0114159	0.00440516	0.0156811	0.0100836	0.0211963	0.00968204	0.0148561	0.0154452	0.0587279	0.026223	0.0250458
Bacteroidota	Bacteroidia	Bacteroidales	Muribaculaceae	uncultured_Bacteroidales_bacterium	uncultured_Bacteroidales_bacterium	0	0	0	0	0	0	0	0	0	0	0	0	0	0	0	0	0	0	0	0	0	0	0	0	0	0	0	0	0	0	0	0	0	0	0	0
Bacteroidota	Bacteroidia	Bacteroidales	Muribaculaceae	uncultured_Porphyromonadaceae_bacterium	uncultured_Porphyromonadaceae_bacterium	0.00118396	0.00245962	0.000160897	1.28393e-05	3.90401e-05	0.000132375	0	0	0	2.74597e-05	0	0	0	0	0	2.74473e-05	0	0	0.00805735	0.0513114	0.0177858	0.0188095	0.0288194	0.0106628	0.0254921	0.0544372	0.0234796	0.0350742	0.0301007	0.00910097	0.0146605	0.00785379	0.0291256	0.0247943	0.0274577	0.024834
Bacteroidota	Bacteroidia	Bacteroidales	Paludibacteraceae	unclassified_Paludibacteraceae	unclassified_Paludibacteraceae	0	0	0.000134081	0	0	0	0	0	0	2.74597e-05	0	0	0	0	0	0	0	0	0	0.00279196	0.00153902	0.00568082	0.00139713	0.00243635	0	0	0	0.00154538	0.00159056	0.00148979	0.000376283	0.00346447	0.000160432	0.00101384	0.000205786	0.00352395
Bacteroidota	Bacteroidia	Bacteroidales	Porphyromonadaceae	Porphyromonas	unclassified_Porphyromonas	2.63103e-05	0	0	0	0	0	0	0	0	0	0	0	0	0	0	0	0	0	0	0	0	0	0	0	0	0	0	0	0	0	0	0	0	0	0	0
Bacteroidota	Bacteroidia	Bacteroidales	Prevotellaceae	Alloprevotella	Prevotella_sp._canine_oral_taxon_282	0	0	0	2.56786e-05	0	0	0	0	0	0	0	0	0	0	0	0	0	0	0	0	0	0	0	0	0	0	0	0	0	0	0	0	0	0	0	0
Bacteroidota	Bacteroidia	Bacteroidales	Prevotellaceae	Alloprevotella	Prevotellaceae_bacterium_Marseille_P2831	0	0	0	0	0	0	0	0	0	0	0	0	0	0	0	0	0	0	0	0	0	0	0	0	0	0	0	0	0	0	0	0	0	0	0	0
Bacteroidota	Bacteroidia	Bacteroidales	Prevotellaceae	Alloprevotella	unclassified_Alloprevotella	0	0	2.68161e-05	0	0	9.26625e-05	0	0	0	0	0	5.64366e-05	4.07371e-05	0	2.75604e-05	0	2.71558e-05	0	0.00246237	0.0119924	0.00405082	0.00420585	0.0206893	0.0025717	0.0121427	0.0143064	0.00662955	0.0151054	0.0165809	0.00808319	0.00680203	0.0177187	0.0114927	0.00584447	0.0228569	0.00350882
Bacteroidota	Bacteroidia	Bacteroidales	Prevotellaceae	Alloprevotella	uncultured_Bacteroidales_bacterium	0	0	0	0	0	0	0	0	0	5.49194e-05	0	0	0	0	0	0	0	0	0.000364256	0	0.00015971	0.000496524	0	0.000962507	0.00171959	0.011883	0.0091447	0.00524219	0.00115541	0.00103252	0.00523901	0.0162654	0.00115219	0	0.00124941	0.00228376
Bacteroidota	Bacteroidia	Bacteroidales	Prevotellaceae	Prevotella	Prevotella_sp._DJF_LS16	0	0	0	0	0	0	0	0	0	0	0	0	0	0	0	0	0	0	0	0.000752239	0.000348457	0	0.000208083	0	0.00137265	0.000321163	0.00143931	0	0.000210075	0	0.000694676	0.000513799	0	0.000387643	0.00130821	4.53727e-05
Bacteroidota	Bacteroidia	Bacteroidales	Prevotellaceae	Prevotella	unclassified_Prevotella	0.000210482	0.0002792	6.70403e-05	0	0	5.295e-05	0	0	0	1.37299e-05	0	1.41091e-05	0	0	0	0	0	1.31631e-05	0.00193784	0.0230301	0.00933575	0.0102664	0.0167655	0.00735416	0.00711969	0.00551817	0.00760362	0.0100753	0.0132797	0.0100007	0.0153842	0.0201262	0.0120761	0.0190691	0.0322642	0.013506
Bacteroidota	Bacteroidia	Bacteroidales	Prevotellaceae	Prevotella_7	Prevotella_sp._RS2	0.0011445	5.31809e-05	0	0	0	0	0	0	0	0	0	0	0	0	0	0	0	0	0.00134046	0.00284983	0.000290381	0	0	0	0.0023682	0.000379557	0.00343108	0.00219687	0.00124544	0	0.000303921	0.00123312	0	0.00155057	0.000940734	0
Bacteroidota	Bacteroidia	Bacteroidales	Prevotellaceae	Prevotella_7	unclassified_Prevotella_7	0	0	0	0	0	0	0	0	0	0	0	0	0	3.97362e-05	0	0	0	0	0.00115105	0	0	0	0.000282398	0	0.013455	0.000248172	0	0.00495432	0	0	0	0	0	4.47281e-05	0	0
Bacteroidota	Bacteroidia	Bacteroidales	Prevotellaceae	Prevotella_7	uncultured_Prevotellaceae_bacterium	0	0	0	0	0	0	0	0	0	0	0	0	0	0	0	0	0	0	0	0	0	0	0	0	0	0	0	0	0	0	2.89448e-05	0	0	0	0	0
Bacteroidota	Bacteroidia	Bacteroidales	Prevotellaceae	Prevotella_9	Prevotellaceae_bacterium	0	0	0	0	0	0	0	0	0	0	0	0	0	0	0	0	0	0	0.000422537	0.00146108	0	0.000379695	0.000802604	0	0.00374086	0.000627728	0.002457	0.00134842	0.00541692	0	0.00272081	0.00910159	0.000481295	0.000745468	0.00693791	0.000302485
Bacteroidota	Bacteroidia	Bacteroidales	Prevotellaceae	Prevotella_9	Prevotellaceae_bacterium_DJF_LS10	0	0	0	0	0	0	0	0	0	0	0	0	0	0	0	0	0	0	0	0	0	0	0	0	0	0	0	3.03017e-05	0	0	0	2.936e-05	0	2.98187e-05	7.34948e-05	0
Bacteroidota	Bacteroidia	Bacteroidales	Prevotellaceae	Prevotella_9	unclassified_Prevotella_9	0.000762997	6.64761e-05	0	0	0	0.00015885	0	0	0	0.000274597	0	0	0	2.64908e-05	0	0	1.35779e-05	0	0.00900441	0.00650976	0	0.000671768	0.0146847	0	0.0370164	0.00589772	0.0459852	0.0251352	0.0328016	0.00150454	0.0218533	0.0462272	0.00701524	0.00745468	0.06006	0
Bacteroidota	Bacteroidia	Bacteroidales	Prevotellaceae	Prevotella_9	uncultured_Bacteroidetes_bacterium	3.94654e-05	0	0	0	0	0	0	0	0	0	0	0	0	0	0	0	0	0	0	0	0	0	0	0	0	0	0	0	0	0	0	0	0	0	0	0
Bacteroidota	Bacteroidia	Bacteroidales	Prevotellaceae	Prevotellaceae_NK3B31_group	unclassified_Prevotellaceae_NK3B31_group	7.89308e-05	0.0011035	0.000844708	0	0	0.000357412	0	0	0	8.23791e-05	0	0	0	0	0	0	0	1.31631e-05	0.000670232	0.0298292	0.0174083	0.035078	0.0256387	0.0232957	0.00378611	0.00616049	0.00218077	0.0125752	0.0306409	0.00547238	0.0101017	0.0281856	0.0217604	0.037989	0.0144785	0.031655
Bacteroidota	Bacteroidia	Bacteroidales	Prevotellaceae	Prevotellaceae_NK3B31_group	uncultured_Prevotella_sp.	0	0.00091737	0	0	0	0.000503025	0	0	0	0	0	0	0	0	0	0	0	0	0.00145703	0.0099093	0.00136479	0.00146037	0.0182964	0.00141368	0.0159288	0.00494883	0.00167192	0.0126055	0.0219078	0.00293532	0.0157315	0.0117733	0.00599431	0.0113162	0.0211224	0.00344833
Bacteroidota	Bacteroidia	Bacteroidales	Prevotellaceae	Prevotellaceae_UCG_001	unclassified_Prevotellaceae_UCG_001	0	0	2.68161e-05	0	0	0	4.02868e-05	0	0	4.11896e-05	0	0	0	0	0	0	0	0	0	0.000289323	0.0027441	0.0012121	0.000356713	0.000782037	0	0.000233573	0	0.000318167	0.002806	0.00144553	5.78896e-05	0.000366999	0.0018085	0.000626193	0.000132291	0.000453727
Bacteroidota	Bacteroidia	Bacteroidales	Prevotellaceae	Prevotellaceae_UCG_001	uncultured_rumen_bacterium	0	0	0	0	0	7.9425e-05	0	0	0	0	0	0	0	0	0	0	4.07338e-05	1.31631e-05	0	0.000462916	0.00193103	0.0163561	0	0.0221377	0.00114639	0	0	0	0	0	0	0	0	0	0	0.00614044
Bacteroidota	Bacteroidia	Bacteroidales	Prevotellaceae	Prevotellaceae_UCG_003	Alloprevotella_sp._feline_oral_taxon_309	0	0	0	0	0	0	0	0	0	0	0	0	0	0	0	0	0	0	0	0	0	0	0	0	0	0	0	0	0	0	0	0	0	0	0	0
Bacteroidota	Bacteroidia	Bacteroidales	Prevotellaceae	Prevotellaceae_UCG_003	unclassified_Prevotellaceae_UCG_003	0	0	0	0	0	0.0001059	0	0	0	2.74597e-05	0	0	0	0	0	1.37236e-05	0	0	0.003526	0.0212941	0.0116298	0.0223874	0.00991365	0.0144376	0.00438947	0.0144961	0.00856316	0.0171962	0.0161007	0.0212848	0.0165275	0.029815	0.0136513	0.0158934	0.0208431	0.0195556
Bacteroidota	Bacteroidia	Bacteroidales	Prevotellaceae	Prevotellaceae_UCG_003	uncultured_rumen_bacterium	0	0	0	0	0	0	0	0	0	0	0	0	0	0	0	0	0	0	0	0	0	0	0	3.00784e-05	0	0	0	0	0	0	0	0	0	0	0	0
Bacteroidota	Bacteroidia	Bacteroidales	Prevotellaceae	Prevotellaceae_UCG_004	unclassified_Prevotellaceae_UCG_004	0	0	2.68161e-05	0	0	6.61875e-05	0	0	0	0.000343246	0	0	0	0	0	4.11709e-05	1.35779e-05	0	0	0.00244478	0.00200363	0.00245341	0.000624248	0.00306799	0.000678784	0.000204377	4.36154e-05	0.000636335	0.000645229	0.00243381	0.000622314	0.00016148	0.00167724	0.00114802	0.0014699	0.00192078
Bacteroidota	Bacteroidia	Bacteroidales	Prevotellaceae	Prevotellaceae_UCG_004	uncultured_rumen_bacterium	0	0	0	0	0	0	0	0	0	0	0	0	0	0	0	0	0	0	0	0	0	0	0	0	0	0	0	0	0	0	0	0	0	0	0	0
Bacteroidota	Bacteroidia	Bacteroidales	Prevotellaceae	unclassified_Prevotellaceae	unclassified_Prevotellaceae	6.57756e-05	0.000598285	5.36322e-05	2.56786e-05	0	0.000119137	2.68579e-05	0	0	0	0	0	0	0	1.37802e-05	0	0	0	0.00189413	0.0145095	0.0114555	0.0146475	0.0138969	0.0204834	0.0100611	0.00245252	0.00263146	0.0173931	0.0185616	0.0085847	0.00890053	0.0173958	0.0132867	0.0233928	0.0106274	0.0404876
Bacteroidota	Bacteroidia	Bacteroidales	Prolixibacteraceae	unclassified_Prolixibacteraceae	unclassified_Prolixibacteraceae	0	0	0	0	0	0	0	0	0	0	0	0	0	0	0	0	0	0	0	0	0	0	0	0	0	0	0	0	0	0	0	0	0	0	0	0
Bacteroidota	Bacteroidia	Bacteroidales	Rikenellaceae	Alistipes	Bacteroides_sp._DSM_12148	0	0	0	0	0	0	0	0	0	0	0	0	0	0	0	0	0	0	0	0	0	0	0	0	0	0	0	0	0	0	0	2.936e-05	0	0	0	0
Bacteroidota	Bacteroidia	Bacteroidales	Rikenellaceae	Alistipes	unclassified_Alistipes	0	0	0	0	0	0	4.02868e-05	0	0	0	0	0	0	0	0	0	0	0	0	0.00261837	0.000203267	4.3811e-05	0	0.00018047	0.000241346	0	0	0.000106056	4.5016e-05	0	0	0	0	0	0	0
Bacteroidota	Bacteroidia	Bacteroidales	Rikenellaceae	Rikenella	unclassified_Rikenella	0	0	0	0	0	0	0	0	0	0	0	0	0	0	0	0	0	0	0	0	0	0	0	0	0	0	0	0	0	0	0	0	0	0	0	0
Bacteroidota	Bacteroidia	Bacteroidales	Rikenellaceae	Rikenellaceae_RC9_gut_group	unclassified_Rikenellaceae_RC9_gut_group	0	0.000465333	0.000160897	0	0	0.000383887	2.68579e-05	2.66944e-05	0	4.11896e-05	0	2.82183e-05	0	0	4.13405e-05	0	0	0	0.00601751	0.0324475	0.0292414	0.0296892	0.0137632	0.0285744	0.01614	0.0302915	0.0173153	0.01909	0.0151254	0.0212995	0.00926234	0.0129331	0.0218333	0.0292074	0.0161836	0.0274354
Bacteroidota	Bacteroidia	Bacteroidales	Rikenellaceae	Rikenellaceae_RC9_gut_group	uncultured_Bacteroidales_bacterium	0	0	2.68161e-05	0	0	0	2.68579e-05	0	1.32496e-05	0	0	0	0	0	0	0	0	0	0.000174843	0.0167662	0.0180327	0.0196711	0	0.00532387	0	0.00672983	0.00125031	0	0.00477169	0.0121543	0.0031984	0	0.0152848	0.0110478	0.00762876	0.0217789
Bacteroidota	Bacteroidia	Bacteroidales	Rikenellaceae	Rikenellaceae_RC9_gut_group	uncultured_Rikenella_sp.	0	0	0	0	0	0	0	0	0	0	0	0	0	0	0	0	0	0	0	1.44661e-05	0	2.92073e-05	0	0	0	0	0	1.51508e-05	0	0	0	0	0	0	0	0
Bacteroidota	Bacteroidia	Bacteroidales	Rikenellaceae	Rikenellaceae_RC9_gut_group	uncultured_beta_proteobacterium	0	0	0	0	0	3.97125e-05	0	0	0	0	0	0	0	0	0	1.37236e-05	0	0	0.000305975	0.001707	0.00362976	0.000700976	0.000653974	0.0026469	0.000799457	0.00164961	0.000581539	0.00106056	0.00307609	0.00234531	0.00154855	0.0015414	0.00424415	0.00333969	0.00133761	0.00134606
Bacteroidota	Bacteroidia	Bacteroidales	Rikenellaceae	Rikenellaceae_RC9_gut_group	uncultured_rumen_bacterium	0	0	0	0	0	2.6475e-05	0	0	0	0	0	0	0	0	0	0	0	0	0	0	0	0	0	3.00784e-05	0	0	0	0	0	0	0	0	0	0	0	0
Bacteroidota	Bacteroidia	Bacteroidales	Rikenellaceae	Rikenellaceae_RC9_gut_group	unidentified_rumen_bacterium_RF14	0	0	0	0	0	0	0	0	0	0	2.59047e-05	0	0	0	0	0	0	0	0	0	0	0	0	0	0	0	0	0	0	0	0	0	0	0	0	0
Bacteroidota	Bacteroidia	Bacteroidales	Rikenellaceae	SP3_e08	unclassified_SP3_e08	0	0	0	0	0	0	0	0	0	0	0	0	0	0	0	0	0	0	0	5.78645e-05	0	0.000189848	0	3.00784e-05	3.01682e-05	4.3795e-05	0	0	4.5016e-05	0.000132753	5.78896e-05	0	0	8.94561e-05	0	0.00010587
Bacteroidota	Bacteroidia	Bacteroidales	Rikenellaceae	dgA_11_gut_group	unclassified_dgA_11_gut_group	0	0	0	0	0	0	0	0	0	0	0	0	0	0	0	0	0	0	0	0	0	0	0	0	0	0	0	0	0	0	0	0	0	0	0	0
Bacteroidota	Bacteroidia	Bacteroidales	Rikenellaceae	dgA_11_gut_group	uncultured_Bacteroidales_bacterium	0	0.000518514	0.000147489	0	0	3.97125e-05	0	0	0	1.37299e-05	0	0	0	0	0	0	0	0	0.00059738	0.00609024	0.00339746	0.0012121	0.00123363	0.00183478	0.000935214	0.00452548	0.00222439	0.000999955	0.000690245	0.0021683	0.000173669	0.000616559	0.00141472	0.00198294	0.00515934	0.00350882
Bacteroidota	Bacteroidia	Bacteroidales	Rikenellaceae	unclassified_Rikenellaceae	unclassified_Rikenellaceae	0	0	0	0	0	0	0	0	2.64992e-05	0	0	0	0	0	0	0	0	0	0.000233124	0.000101263	0.00015971	0.00167942	0.00151603	0.00091739	0.000437439	5.83933e-05	7.26924e-05	0	0	2.95007e-05	0	0	0.000102093	0.00265386	0.000808443	9.07455e-05
Bacteroidota	Bacteroidia	Bacteroidales	Tannerellaceae	Parabacteroides	Porphyromonadaceae_bacterium_DJF_B175	0	6.64761e-05	0.000174305	0.000102714	0	2.6475e-05	0	0	0	0.00218305	0	0	0	0	0.000179142	2.74473e-05	0.000149357	0	0.000349686	0.0062783	0.00924864	0.0168818	0.00689645	0.00377483	0.00998567	0.000773711	0.00152654	0.00842386	0.0176763	0.0061509	0.0100294	0.00330299	0.00608182	0.0112864	0.00908396	0.00859057
Bacteroidota	Bacteroidia	Bacteroidales	Tannerellaceae	Parabacteroides	unclassified_Parabacteroides	0	0	2.68161e-05	0	0	0.000145612	2.68579e-05	0	0	9.6109e-05	0	0	0	0	0	0	0	0	0.000888785	0.00162021	0.000885662	0.00262866	0.00266048	0.00386507	0.00481183	0.00401454	0.00702208	0.00818145	0.00889816	0.00334833	0.0025182	0.00143864	0.00157515	0.00272841	0.0028075	0.00104357
Bacteroidota	Bacteroidia	Bacteroidales	Tannerellaceae	unclassified_Tannerellaceae	unclassified_Tannerellaceae	0	0	0	0	0	0	0	0	0	0	0	0	0	0	0	0	0	0	0	0	0	0	0	0	0	0	0	0	0	0	0	0	0	2.98187e-05	0	0
Bacteroidota	Bacteroidia	Bacteroidales	Williamwhitmaniaceae	Blvii28_wastewater_sludge_group	uncultured_Anaerophaga_sp.	0	0	0	0	0	0	0	0	0	0	0	0	0	0	0	0	0	0	0	0	0	0	0	0	0	0	0	0	0	0	0	0	0	0	0	0
Bacteroidota	Bacteroidia	Bacteroidales	p_251_o5	unclassified_p_251_o5	unclassified_p_251_o5	0	0	8.04484e-05	0	0	0	0	0	0	8.23791e-05	0	0	0	0	0	0	0	0	0	0.00261837	0.0031216	0.00587067	0	0.00467718	0	0	0	0	0	0.00272881	0	0	0.00145847	0.000283278	0	0.00284336
Bacteroidota	Bacteroidia	Bacteroidales	p_2534_18B5_gut_group	unclassified_p_2534_18B5_gut_group	unclassified_p_2534_18B5_gut_group	0	0	0	0	0	2.6475e-05	0	0	0	9.6109e-05	0	0	0	0	2.75604e-05	0	4.07338e-05	0	0	0.0017938	0.00557532	0.00528652	0	0.00172951	0	0	0	0	0	0.00191755	0	0	0.000422956	4.47281e-05	0	0.00060497
Bacteroidota	Bacteroidia	Bacteroidales	unclassified_Bacteroidales	unclassified_Bacteroidales	unclassified_Bacteroidales	0	0	8.04484e-05	0	0	9.26625e-05	5.37158e-05	0	0	0	0	0	0	0	2.75604e-05	0	0	0	0.0033803	0.00199633	0.00496552	0.00316899	0.00127822	0.000857233	0.00871861	0.00237953	0.000770539	0.00234838	0.00460664	0.00188804	0.00107096	0.00162948	0.00113761	0.00199785	0.00129351	0.00372056
Bacteroidota	Bacteroidia	Chitinophagales	Chitinophagaceae	Edaphobaculum	unclassified_Edaphobaculum	0	0	0	0	0	0	2.68579e-05	0	0	0	0	0	0	0	0	0	0	0	0	0	0	0	0	0	0	0	0	0	0	0	0	0	0	0	0	0
Bacteroidota	Bacteroidia	Chitinophagales	Chitinophagaceae	Ferruginibacter	unclassified_Ferruginibacter	0	0	0	0	0	0	0	0	0	0	2.59047e-05	0	0	0	0	0	0	0	0	0	0	0	0	0	0	0	0	0	0	0	0	0	0	0	0	0
Bacteroidota	Bacteroidia	Chitinophagales	Chitinophagaceae	Sediminibacterium	unclassified_Sediminibacterium	0	0	0	0	0	0	0	0	0	0	0	0	0	0	0	0	0	0	0	0	0	0	0	0	0	0	0	0	0	0	0	0	0	0	0	0
Bacteroidota	Bacteroidia	Chitinophagales	Chitinophagaceae	Terrimonas	unclassified_Terrimonas	0	5.31809e-05	0	0	0	0	0	0	0	0	0	0	0	0	0	0	0	0	0	0	0	0	0	0	0	0	0	0	0	0	0	0	0	0	0	0
Bacteroidota	Bacteroidia	Chitinophagales	Chitinophagaceae	unclassified_Chitinophagaceae	unclassified_Chitinophagaceae	0	0	0	3.85178e-05	0	0	0	0	0	0	5.18094e-05	0	0	0	0	0	0	0	0	0	0	0	0	0	0	0	0	0	0	0	0	0	0	0	0	0
Bacteroidota	Bacteroidia	Chitinophagales	Chitinophagaceae	unclassified_Chitinophagaceae	uncultured_Ferruginibacter_sp.	0	0	0	0	0	0	0	0	0	0	5.18094e-05	0	0	0	0	0	0	0	0	0	0	0	0	0	0	0	0	0	0	0	0	0	0	0	0	0
Bacteroidota	Bacteroidia	Chitinophagales	Saprospiraceae	unclassified_Saprospiraceae	unclassified_Saprospiraceae	0	0	0	0	0	0	0	0	0	0	0	0	0	0	0	0	0	0	0	0	0	0	0	0	0	0	0	0	0	0	0	0	0	0	0	0
Bacteroidota	Bacteroidia	Chitinophagales	Saprospiraceae	unclassified_Saprospiraceae	uncultured_soil_bacterium	0	0	0	0	0	0	0	0	0	0	0	0	0	0	0	0	0	0	0	0	0	0	0	0	0	0	0	0	0	0	0	0	0	0	0	0
Bacteroidota	Bacteroidia	Chitinophagales	unclassified_Chitinophagales	unclassified_Chitinophagales	unclassified_Chitinophagales	0	0	0	0	0	0	0	0	0	0	0	0	0	0	0	5.48945e-05	0	0	0	0	0	0	0	0	0	0	0	0	0	0	0	0	0	0	0	0
Bacteroidota	Bacteroidia	Cytophagales	Cyclobacteriaceae	Algoriphagus	Algoriphagus_marincola	0	0	0	0	0	0	0	0	0	0	0	0	0	0	0	0	0	0	0	0	0	0	0	0	0	0	0	0	0	0	0	0	0	7.45468e-05	0	0
Bacteroidota	Bacteroidia	Cytophagales	Cyclobacteriaceae	Algoriphagus	unclassified_Algoriphagus	0	0	0	0	0	0	0	0	0	0	0	0	0	0	0	0	0	0	0	0	0	0	0	0	0	0	0	3.03017e-05	0	0	0	0	0	0	0	0
Bacteroidota	Bacteroidia	Cytophagales	Cyclobacteriaceae	unclassified_Cyclobacteriaceae	uncultured_Flammeovirgaceae_bacterium	0	0	0	0	0	0	0	0	0	0	0	0	0	0	0	0	0	0	0	0	0	0	0	0	0	1.45983e-05	0	0	0	0	0	0	0	1.49094e-05	0	0
Bacteroidota	Bacteroidia	Cytophagales	Hymenobacteraceae	Pontibacter	unclassified_Pontibacter	0.000368344	0	0	0	0	0	0	0	0	0	0	0	0	0	0	0	0	0	0	0	0	0	0	0	0	0	0	0	0	0	0	0	0	0	0	0
Bacteroidota	Bacteroidia	Cytophagales	Spirosomaceae	Pseudarcicella	unclassified_Pseudarcicella	0	0	0	0	0	0	0	0	0	0	0	0	0	0	0	0	0	0	0	0	0	0	0	0	0	0	0	0	0	0	0	0	0	0	0	0
Bacteroidota	Bacteroidia	Flavobacteriales	Flavobacteriaceae	Actibacter	Namhaeicola_litoreus	0	0	0	0	0	0	0	0	0	0	0	0	0	0	0	0	0	0	0	0	0	0	0	0	0	0	0	0	0	0	2.89448e-05	0	2.91694e-05	4.47281e-05	0	3.02485e-05
Bacteroidota	Bacteroidia	Flavobacteriales	Flavobacteriaceae	Antarcticibacterium	unclassified_Antarcticibacterium	2.63103e-05	0	0	0	0	0	0	0	0	0	0	0	0	0	0	0	0	0	0	0	0	0	0	0	0	0	0	0	0	0	0	0	0	0	0	0
Bacteroidota	Bacteroidia	Flavobacteriales	Flavobacteriaceae	Aquimarina	Aquimarina_sp._BG_3_R2	0	0	0	0	0	0	0	0	0	0	0	0	0	0	0	0	0	0	0	0	0	0	0	0	0	0	0	3.03017e-05	3.00107e-05	0	0	0	0	0	0	0
Bacteroidota	Bacteroidia	Flavobacteriales	Flavobacteriaceae	Flavobacterium	unclassified_Flavobacterium	0	0	0	0	0	0	0	0	0	0	0	0	0	0	0	0	0	0	0	0	0	0	0	0	0	0	0	0	0	0	0	0	0	0	0	0
Bacteroidota	Bacteroidia	Flavobacteriales	Flavobacteriaceae	Formosa	unclassified_Formosa	0	0	0	0	0	0	0	0	0	0	0	0	0	0	0	0	0	0	0	0	0	0	0	0	0	0	0	7.57541e-05	0	0	0	0	5.83388e-05	0	0	0
Bacteroidota	Bacteroidia	Flavobacteriales	Flavobacteriaceae	Hanstruepera	Hanstruepera_neustonica	0	0	0	0	0	0	0	0	0	0	0	0	0	0	0	0	0	0	0	0	0	0	0	0	0	0	0	0	0	2.95007e-05	0	0	0	2.98187e-05	0	0
Bacteroidota	Bacteroidia	Flavobacteriales	Flavobacteriaceae	Lutibacter	unclassified_Lutibacter	0	0	0	0	0	0	0	0	0	0	0	0	0	0	0	0	0	0	0	0	0	0	0	0	0	0	0	0	0	0	0	0	0	0	0	0
Bacteroidota	Bacteroidia	Flavobacteriales	Flavobacteriaceae	Maribacter	unclassified_Maribacter	0	0	0	0	0	0	0	0	0	0	0	0	0	0	0	0	0	0	0	0	0	0	0	0	0	0	0	0	3.00107e-05	0	5.78896e-05	0	0	0	2.93979e-05	0
Bacteroidota	Bacteroidia	Flavobacteriales	Flavobacteriaceae	Muricauda	unclassified_Muricauda	0	0	0	0	0	0	0	0	0	0	0	0	0	0	0	0	0	0	0	0	0	0	0	0	0	0	0	3.03017e-05	0	0	0	0	0	0	0	0
Bacteroidota	Bacteroidia	Flavobacteriales	Flavobacteriaceae	Myroides	Myroides_phaeus	0	0	0	0	0	0	0	0	0	0	0	0	0	0	4.13405e-05	0	0	0	0	0	0	0	0	0	0	0	0	0	0	0	0	0	0	0	0	0
Bacteroidota	Bacteroidia	Flavobacteriales	Flavobacteriaceae	Myroides	Myroides_sp._KB31	0	0	0	0	0	0	0	0	0	0	0	0	0	0	0.000206703	0	0	0	0	0	0	0	0	0	0	0	0	0	0	0	0	0	0	0	0	0
Bacteroidota	Bacteroidia	Flavobacteriales	Flavobacteriaceae	Myroides	unclassified_Myroides	0	0	2.68161e-05	2.56786e-05	0	0	0	0	0	0	0	0	0	0	0	0	0	0	0	0	0	0	0	0	0	0	0	0	0	0	0	0	0	0	0	0
Bacteroidota	Bacteroidia	Flavobacteriales	Flavobacteriaceae	Robiginitalea	Robiginitalea_bacterium_K2_15	0	0	0	0	0	0	0	0	0	0	0	0	0	0	0	0	0	0	0	0	0	0	0	0	0	0	4.36154e-05	1.51508e-05	0	2.95007e-05	0	0	0	1.49094e-05	0	0
Bacteroidota	Bacteroidia	Flavobacteriales	Flavobacteriaceae	Robiginitalea	unclassified_Robiginitalea	0	0	0	0	0	0	0	0	0	0	0	0	0	0	0	0	0	0	0	0	0	0	0	0	0	0	0	0	0	0	0	0	2.91694e-05	0	2.93979e-05	0
Bacteroidota	Bacteroidia	Flavobacteriales	Flavobacteriaceae	unclassified_Flavobacteriaceae	unclassified_Flavobacteriaceae	0	0	0	0	0	0	0	0	0	0	0	0	0	0	0	0	0	0	0	0	0	0	0	0	0	0	0	0	3.00107e-05	2.95007e-05	4.34172e-05	4.40399e-05	0	0	5.87959e-05	0
Bacteroidota	Bacteroidia	Flavobacteriales	NS9_marine_group	uncultured_Bacteroidetes_bacterium	uncultured_Bacteroidetes_bacterium	0	0	0	0	0	0	0	0	0	0	0	0	0	0	0	0	0	0	0	0	0	0	0	0	0	0	0	0	0	0	0	0	0	0	0	0
Bacteroidota	Bacteroidia	Flavobacteriales	Weeksellaceae	Cloacibacterium	unclassified_Cloacibacterium	0	0	0	2.56786e-05	0.000351361	0	0	0	0	0	0	0	0	1.32454e-05	0	0	0	0	0	0	0	0	0	0	0	0	0	0	0	0	0	0	0	0	0	0
Bacteroidota	Bacteroidia	Sphingobacteriales	KD3_93	unclassified_KD3_93	unclassified_KD3_93	0	0	0	0	0	0	0	0	0	0	0	0	0	0	0	0	0	0	0	0	0	0	0	0	0	0	0	0	0	0	0	0	0	0	0	0
Bacteroidota	Bacteroidia	Sphingobacteriales	Sphingobacteriaceae	Arcticibacter	unclassified_Arcticibacter	0	0	0	0	0	0	0	0	0	0	2.59047e-05	0	0	0	0	0	0	0	0	0	0	0	0	0	0	0	0	0	0	0	0	0	0	0	0	0
Bacteroidota	Bacteroidia	Sphingobacteriales	Sphingobacteriaceae	Mucilaginibacter	unclassified_Mucilaginibacter	0	0	0	0	0	0	0	0	0	0	0	0	0	0	0	0	0	0	0	0	0	0	0	0	0	0	0	0	0	0	0	0	0	0	0	0
Bacteroidota	Bacteroidia	Sphingobacteriales	Sphingobacteriaceae	Sphingobacterium	unclassified_Sphingobacterium	0	0	2.68161e-05	0	0	0	2.68579e-05	0	0	0	0	0	0	0	0	0	0	0	0	0	0	0	0	0	0	0	0	0	0	0	0	0	0	0	0	0
Bacteroidota	Bacteroidia	unclassified_Bacteroidia	unclassified_Bacteroidia	unclassified_Bacteroidia	unclassified_Bacteroidia	0	0	0	0	0	0	0	0	0	0	0	0	0	0	0	0	0	0	0	0	0	0	0	3.00784e-05	0	0	0	3.03017e-05	0	0	0	2.936e-05	2.91694e-05	0	0	9.07455e-05
Bacteroidota	Ignavibacteria	Ignavibacteriales	unclassified_Ignavibacteriales	unclassified_Ignavibacteriales	unclassified_Ignavibacteriales	0	0	0	0	0	0	0	0	0	0	0	0	0	0	0	0	0	0	0	0	0	0	0	0	0	0	0	0	0	0	0	0	0	0	0	0
Bacteroidota	Ignavibacteria	SJA_28	Chlorobi_bacterium_OLB5	unclassified_Chlorobi_bacterium_OLB5	unclassified_Chlorobi_bacterium_OLB5	0	0	0	0	0	0	0	0	0	0	0	0	0	0	0	0	0	0	0	0	0	0	0	0	0	0	0	0	0	0	0	0	0	0	0	0
Bacteroidota	Ignavibacteria	SJA_28	uncultured_Chlorobi_bacterium	uncultured_Chlorobi_bacterium	uncultured_Chlorobi_bacterium	0.000381499	0	0	0	0	0	0	0	0	0	0	0	0	0	0	0	0	0	0	0	0	0	0	0	0	0	0	0	0	0	0	0	0	0	0	0
Bdellovibrionota	Bdellovibrionia	Bacteriovoracales	Bacteriovoracaceae	Peredibacter	unclassified_Peredibacter	0	0	0	0	2.60268e-05	0	0	0	0	0	0	0	0	0	0	0	0	0	0	0	0	0	0	0	0	0	0	0	0	0	0	0	0	0	0	0
Bdellovibrionota	Bdellovibrionia	Bdellovibrionales	Bdellovibrionaceae	Bdellovibrio	Bdellovibrionales_bacterium_RBG_16_40_8	0	0	0	0	0	0	0	0	0	2.74597e-05	0	0	0	0	0	0	0	0	0	0	0	0	0	0	0	0	0	0	0	0	0	0	0	0	0	0
Bdellovibrionota	Bdellovibrionia	Bdellovibrionales	Bdellovibrionaceae	Bdellovibrio	unclassified_Bdellovibrio	0	0	0	0	0	0	2.68579e-05	0	0	0	0	0	0	0	0	0	0	0	0	0	0	0	0	0	0	0	0	0	0	0	0	0	0	0	0	0
Bdellovibrionota	Bdellovibrionia	Bdellovibrionales	Bdellovibrionaceae	OM27_clade	unclassified_OM27_clade	0	0	0	0	0	0	0	0	0	0	0	0	0	0	0	0	0	0	0	0	0	0	0	0	0	0	0	0	0	0	0	0	0	0	0	0
Bdellovibrionota	Oligoflexia	0319_6G20	unclassified_0319_6G20	unclassified_0319_6G20	unclassified_0319_6G20	0	0	0	0	0	0	0	0	0	0	0	0	0	0	0	0	0	0	0	0	0	0	0	0	0	0	0	0	0	0	0	0	0	0	0	0
Bdellovibrionota	Oligoflexia	Oligoflexales	Oligoflexaceae	unclassified_Oligoflexaceae	unclassified_Oligoflexaceae	0	0	0	0	0	2.6475e-05	0	0	0	0	0	0	0	0	0	0	0	0	0	0	0	0	0	0	0	0	0	0	0	0	0	0	0	0	0	0
Calditrichota	Calditrichia	Calditrichales	Calditrichaceae	Calorithrix	unidentified_bacterium_wb1_A09	0	0	0	0	0	0	0	0	0	0	0	0	0	0	0	0	0	0	0	0	1.45191e-05	0	0	0	0	0	0	0	0	1.47504e-05	0	0	0	0	0	0
Campylobacterota	Campylobacteria	Campylobacterales	Campylobacteraceae	Campylobacter	Campylobacter_hyointestinalis	0	0	0	0	0	0	0	0	0	0	0	0	0	0	0	0	0	0	0	0	0	0	0.000698563	0	0.000784373	0	0	0	0	0	0	0	0	0	0	0
Campylobacterota	Campylobacteria	Campylobacterales	Campylobacteraceae	Campylobacter	Campylobacter_sp._0402694_C0078	0	2.65904e-05	0	0	0	0	0	0	0	0	0	0.000211637	0	0.000264908	0	0	0	0	0	0	0	0	2.97261e-05	6.01567e-05	0	5.83933e-05	0	0	3.00107e-05	0.000162254	0	0	0	0	0	0
Campylobacterota	Campylobacteria	Campylobacterales	Campylobacteraceae	Campylobacter	unclassified_Campylobacter	0	0.00688692	0.00937223	2.56786e-05	0.0013664	0.00630105	0.000322295	2.66944e-05	0.000119246	1.37299e-05	2.59047e-05	0.0373328	0.000488845	0.0120003	0.000110241	0.000837142	0.000149357	0.00709491	0	0.00147555	0.0012196	0.0019861	0.00219973	0.00288752	0	0.00132845	0.000130846	0.000560581	0.00495176	0.00921897	0.0010999	0.00026424	0.000277109	0.000447281	0.000587959	0.000589846
Campylobacterota	Campylobacteria	Campylobacterales	Helicobacteraceae	Helicobacter	Helicobacter_rappini	0	3.98857e-05	0	0	0	0	0	0	0	0	0	0.00066313	0	0	0	0	0	0	0	1.44661e-05	0	0	0	4.51175e-05	0	0	0	1.51508e-05	0	0	0	0	0	0	0	0
Campylobacterota	Campylobacteria	Campylobacterales	Helicobacteraceae	Helicobacter	Helicobacter_suis	0	0	0	0	0	0	0	0	0	4.11896e-05	0	0	0	0	0	0	0	0	0	0	0	0	0	0	0	0	0	0	0	0	0	0	0	0	0	0
Campylobacterota	Campylobacteria	Campylobacterales	Helicobacteraceae	Helicobacter	Helicobacter_winghamensis	0	0	0	0	0	0	0	0	0	0	0	0.00237034	0	0	0	0	0	0	0	0	0	0	0	0	0	0	0	0	0	0	0	0	0	0	0	0
Campylobacterota	Campylobacteria	Campylobacterales	Helicobacteraceae	Helicobacter	unclassified_Helicobacter	0	0	0.000107264	0	2.60268e-05	0.00268721	0	0	0	0	1.29524e-05	0.0169874	0.00013579	7.94723e-05	1.37802e-05	0	0	3.94893e-05	0	0	7.25953e-05	8.76219e-05	0	0	3.01682e-05	0	0	0	0	5.90014e-05	2.89448e-05	0	0	0	0	0
Campylobacterota	Campylobacteria	Campylobacterales	Sulfurovaceae	Sulfurovum	unclassified_Sulfurovum	0	0	0	0	0	0	0	0	0	1.37299e-05	0	0	0	0	0	0	0	0	0	0	0	0	0	0	0	0	0	0	0	0	0	0	0	0	1.4699e-05	0
Chloroflexi	Anaerolineae	Anaerolineales	Anaerolineaceae	Anaerolinea	unclassified_Anaerolinea	0	0	0	0	0	2.6475e-05	0	0	0	0	0	0	0	0	0	0	0	0	0	0	0	0	0	0	0	0	0	0	0	0	0	0	0	0	0	0
Chloroflexi	Anaerolineae	Anaerolineales	Anaerolineaceae	Flexilinea	unclassified_Flexilinea	0	0	0	0	0	3.97125e-05	0	0	0	5.49194e-05	0	0	0	0	0	0	0	0	0	0	0	0	0	0	0	0	0	0	0	0	0	0	0	0	0	0
Chloroflexi	Anaerolineae	Anaerolineales	Anaerolineaceae	unclassified_Anaerolineaceae	unclassified_Anaerolineaceae	0	0	0	0	0	0	0	0	0	0	0	0	0	0	0	0	0	0	0	0	0	0	0	0	0	0	0	0	0	0	0	0	0	0	0	0
Chloroflexi	Anaerolineae	Anaerolineales	Anaerolineaceae	unclassified_Anaerolineaceae	uncultured_microorganism	0.000249947	0	0	0	0	0	0	0	0	0	0	0	0	0	0	0	0	0	0	0	0	0	0	0	0	0	0	0	0	0	0	0	0	0	0	0
Chloroflexi	Anaerolineae	Anaerolineales	Anaerolineaceae	unclassified_Anaerolineaceae	uncultured_sludge_bacterium_S41	0	7.97713e-05	0	0	0	0	0	0	0	0	0	0	0	0	0	0	0	0	0	0	0	0	0	0	0	0	0	0	0	0	0	0	0	0	0	0
Chloroflexi	Anaerolineae	Caldilineales	Caldilineaceae	unclassified_Caldilineaceae	Chloroflexi_bacterium_ET1	0	0	0	0	0	0	0	0	0	0	0	0	0	0	0	0	0	0	0	0	0	0	0	0	0	0	0	0	0	0	0	0	0	0	0	0
Chloroflexi	Anaerolineae	RBG_13_54_9	unclassified_RBG_13_54_9	unclassified_RBG_13_54_9	unclassified_RBG_13_54_9	0	5.31809e-05	0	0	0	0	0	0	0	0	0	0	0	0	0	0	0	0	0	0	0	0	0	0	0	0	0	0	0	0	0	0	0	0	0	0
Chloroflexi	Anaerolineae	RBG_13_54_9	uncultured_sludge_bacterium_A31	uncultured_sludge_bacterium_A31	uncultured_sludge_bacterium_A31	0	0	0	0	0	0	0	0	0	2.74597e-05	0	0	0	0	0	0	0	0	0	0	0	0	0	0	0	0	0	0	0	0	0	0	0	0	0	0
Chloroflexi	Anaerolineae	SBR1031	A4b	unclassified_A4b	unclassified_A4b	0	0	0	0	0	0	0	0	0	0	0	0	0	0	0	0	0	0	0	0	0	0	0	0	0	0	0	0	0	0	0	0	0	0	0	4.53727e-05
Chloroflexi	Anaerolineae	SBR1031	A4b	uncultured_gamma_proteobacterium	uncultured_gamma_proteobacterium	0	0	0	0	0	0	0	0	0	2.74597e-05	0	0	0	0	0	0	0	0	0	0	0	0	0	0	0	0	0	0	0	0	0	0	0	0	0	0
Chloroflexi	Anaerolineae	SBR1031	unclassified_SBR1031	unclassified_SBR1031	unclassified_SBR1031	2.63103e-05	0	0	0	0	0	0	0	0	0	2.59047e-05	0	0	0	0	0	0	0	0	0	0	0	0	0	0	0	0	0	0	0	0	0	0	0	0	0
Chloroflexi	Anaerolineae	SBR1031	uncultured_planctomycete	uncultured_planctomycete	uncultured_planctomycete	0	0	0	0	0	0	0	0	0	0	0	0	0	0	0	0	0	0	0	0	0	0	0	0	0	0	0	0	0	0	0	0	0	0	0	0
Chloroflexi	Anaerolineae	SJA_15	uncultured_soil_bacterium	uncultured_soil_bacterium	uncultured_soil_bacterium	0	0	0	0	0	0	0	0	0	0	0	0	0	0	0	0	0	0	0	0	0	0	0	0	0	0	0	0	0	0	0	0	0	0	0	0
Chloroflexi	Anaerolineae	unclassified_Anaerolineae	unclassified_Anaerolineae	unclassified_Anaerolineae	unclassified_Anaerolineae	0.000473585	0	0	0	0	0	0	0	0	0	0	0	0	0	0	0	0	0	0	0	0	0	0	0	0	0	0	0	0	0	0	0	0	0	0	0
Chloroflexi	Chloroflexia	Chloroflexales	Roseiflexaceae	unclassified_Roseiflexaceae	unclassified_Roseiflexaceae	0	0	0	0	0	0	0	0	0	0	0	0	0	0	0	0	0	0	0	0	0	0	0	0	0	0	0	0	0	0	0	0	0	0	0	0
Chloroflexi	Chloroflexia	Kallotenuales	AKIW781	unclassified_AKIW781	unclassified_AKIW781	0.000552515	0	0	0	0	0	0	0	0	0	0	0	0	0	0	0	0	0	0	0	0	0	0	0	0	0	0	0	0	0	0	0	0	0	0	0
Chloroflexi	Chloroflexia	Thermomicrobiales	AKYG1722	uncultured_Alphaproteobacteria_bacterium	uncultured_Alphaproteobacteria_bacterium	0	0	0	0	0	0	0	0	0	4.11896e-05	0	0	0	0	0	0	0	0	0	0	0	0	0	0	0	0	0	0	0	0	0	0	0	0	0	0
Chloroflexi	Chloroflexia	Thermomicrobiales	JG30_KF_CM45	bacterium_QTYC46b	unclassified_bacterium_QTYC46b	0	0	0	0	0	0	0	0	0	0.000164758	0	0	0	0	0	0	2.71558e-05	0	0	0	0	0	0	0	0	0	0	0	0	0	0	0	0	0	0	0
Chloroflexi	Chloroflexia	Thermomicrobiales	JG30_KF_CM45	unclassified_JG30_KF_CM45	unclassified_JG30_KF_CM45	0	0	0	0	0	2.6475e-05	0	0	0	0.000109839	0	0	0	0	0	0	0	0	0	0	0	0	0	0	0	0	0	0	0	0	0	0	0	2.98187e-05	0	0
Chloroflexi	Dehalococcoidia	S085	uncultured_Chloroflexi_bacterium	uncultured_Chloroflexi_bacterium	uncultured_Chloroflexi_bacterium	0	0	0	0	0	0	0	0	0	0	0	0	0	0	0	0	0	0	0	0	2.90381e-05	0	0	0	0	0	0	0	0	0	0	0	0	0	0	0
Chloroflexi	Dehalococcoidia	S085	uncultured_soil_bacterium	uncultured_soil_bacterium	uncultured_soil_bacterium	0	0	0	0	0	0	0	0	0	0	0	0	0	0	6.89009e-05	0	0	0	0	0	0	0	0	0	0	0	0	0	0	0	0	0	0	0	0	0
Chloroflexi	Dehalococcoidia	SAR202_clade	uncultured_Chloroflexi_bacterium	uncultured_Chloroflexi_bacterium	uncultured_Chloroflexi_bacterium	0.000184172	0	0	0	0	0	0	0	0	0	0	0	0	0	0	0	0	0	0	0	0	0	0	0	0	0	0	0	0	0	0	0	0	0	0	0
Chloroflexi	unclassified_Chloroflexi	unclassified_Chloroflexi	unclassified_Chloroflexi	unclassified_Chloroflexi	unclassified_Chloroflexi	0	7.97713e-05	0	0	3.90401e-05	0	0	0	2.64992e-05	5.49194e-05	0	0	0	0	0	0	0	0	0	0	0	0	0	0	0	0	0	0	0	0	0	0	0	0	0	0
Cyanobacteria	Cyanobacteriia	Cyanobacteriales	Cyanobacteriaceae	unclassified_Cyanobacteriaceae	unclassified_Cyanobacteriaceae	0	0	0	0	0	0	0	0	0	0	0	0	0	0	0	0	0	0	0	0	0	0	0	0	0	0	0	0	0	0	0	0	0	0	0	0
Cyanobacteria	Cyanobacteriia	Cyanobacteriales	Microcystaceae	Microcystis_PCC_7914	unclassified_Microcystis_PCC_7914	0	0	0	0	0	0	0	0	0	0	0	0	0	0	0	0	0	0	0	0	0	0	0	0	0	0	0	0	0	0	0	0	0	0	0	0
Cyanobacteria	Cyanobacteriia	Cyanobacteriales	Nostocaceae	unclassified_Nostocaceae	unclassified_Nostocaceae	0	0.000265904	0	0.00238811	3.90401e-05	3.97125e-05	0	2.66944e-05	0	0	0	0.000126982	0.000434529	0	0	0	0	0.0163486	0	5.78645e-05	0	4.3811e-05	4.45891e-05	0	7.54205e-05	4.3795e-05	5.81539e-05	0.000106056	7.50266e-05	0.000206505	0.000115779	0	0.000116678	0.000119275	0.00014699	4.53727e-05
Cyanobacteria	Cyanobacteriia	Cyanobacteriales	unclassified_Cyanobacteriales	unclassified_Cyanobacteriales	unclassified_Cyanobacteriales	0.00636708	0.000252609	0.000120673	0.0003595	0	0	5.37158e-05	0	0	0	0	0	4.07371e-05	0	0.000110241	0	0	0	0	0	0	0	0	0	0	0	0	0	0	0	2.89448e-05	2.936e-05	0	0	0	0
Cyanobacteria	Cyanobacteriia	Leptolyngbyales	Leptolyngbyaceae	YT_3	unclassified_YT_3	0	0	0	0	0	0	0	0	0	2.74597e-05	0	0	0	0	0	0	0	0	0	0	0	0	0	0	0	0	0	0	0	0	0	0	0	0	0	0
Cyanobacteria	Cyanobacteriia	Synechococcales	Synechococcaceae	unclassified_Synechococcaceae	uncultured_Synechococcus_sp.	0	0	0	0	0	0	0	0	0	0	0	0	0	0	0	0	0	0	0	0	0	0	0	0	0	0	0	0	0	0	0	0	0	0	0	0
Cyanobacteria	Vampirivibrionia	Gastranaerophilales	Candidatus_Gastranaerophilales_bacterium_Zag_111	unclassified_Candidatus_Gastranaerophilales_bacterium_Zag_111	unclassified_Candidatus_Gastranaerophilales_bacterium_Zag_111	0	0	0	0	0	6.61875e-05	0	0	0	9.6109e-05	0	0	4.07371e-05	2.64908e-05	6.89009e-05	0	0	0	0.000437108	0.000245924	8.71143e-05	0.000379695	0	0.000120313	0.000226261	0	0	0	0	0	0	0	0.000102093	0.000104365	0	7.56212e-05
Cyanobacteria	Vampirivibrionia	Gastranaerophilales	Candidatus_Melainabacteria_bacterium_MEL.A1	unclassified_Candidatus_Melainabacteria_bacterium_MEL.A1	unclassified_Candidatus_Melainabacteria_bacterium_MEL.A1	7.89308e-05	0	0	0.000128393	0	0	0	0	0	0.000109839	0	0	0	0	0	0	0	0	0	0	0	0	0	0	0.000135757	0	0	0	0	0	0	0	0	0	8.81938e-05	0
Cyanobacteria	Vampirivibrionia	Gastranaerophilales	Clostridium_sp._CAG_306	unclassified_Clostridium_sp._CAG_306	unclassified_Clostridium_sp._CAG_306	0	0	0	0	0	5.295e-05	0	0	0	0	0	0	0	0	0	0	0	0	0	1.44661e-05	5.80762e-05	0	0	0	0	0	0	0	0.000105037	0	0	0	0.000102093	0	0	0
Cyanobacteria	Vampirivibrionia	Gastranaerophilales	unclassified_Gastranaerophilales	unclassified_Gastranaerophilales	unclassified_Gastranaerophilales	0.000776152	3.98857e-05	0.000174305	0	6.50669e-05	0.000569212	1.34289e-05	0	0	0.00146909	0	0	0	0.000105963	0.000482306	0	0.000203669	0	0.000174843	0.000578645	0.000435572	0.000452713	0.000297261	4.51175e-05	0.000512859	0.000992686	0.000145385	0.000651486	0.000405144	0.000619515	0.000593369	0.000954198	0.000670896	0.000328006	0.000661453	0.000514224
Cyanobacteria	Vampirivibrionia	Gastranaerophilales	uncultured_rumen_bacterium	uncultured_rumen_bacterium	uncultured_rumen_bacterium	0.000828773	3.98857e-05	0.000120673	0	0	0.000145612	0	0	0	0.00164758	0	0	2.7158e-05	7.94723e-05	0.000385845	9.60654e-05	5.43117e-05	0	0.000466248	0.000115729	0.000740472	0.000306677	0.000713426	0.000526371	0.000633532	0.00043795	0.000407077	0.00116661	0.000330117	0.000132753	0.000202614	0.000572519	7.29235e-05	0.000208731	0.00014699	0.000483976
Deferribacterota	Deferribacteres	Deferribacterales	Deferribacteraceae	Mucispirillum	Mucispirillum_schaedleri	0	0	0	0	0	0	0	0	0	0	0	0	0	0	0	0	0	0	0	2.89323e-05	0	0	0	0	0	0	0	0	0	0	0	7.33999e-05	0	0	0	0
Deferribacterota	Deferribacteres	Deferribacterales	Deferribacteraceae	Mucispirillum	unclassified_Mucispirillum	0	0	0	0	0	0	0	0	0	0	0	0	0	0	0	0	0	0	0	5.78645e-05	0.000130672	0.000189848	4.45891e-05	0	0.000135757	4.3795e-05	5.81539e-05	0	3.00107e-05	8.85021e-05	0.000115779	0	0	0	5.87959e-05	0
Deinococcota	Deinococci	Deinococcales	Deinococcaceae	Deinococcus	Deinococcus_antarcticus	0	0	0	0	5.20535e-05	0	0	0	0	0	0	0	0	0	0	0	0	0	0	0	0	0	0	0	0	0	0	0	0	0	0	0	0	0	0	0
Dependentiae	Babeliae	Babeliales	Vermiphilaceae	unclassified_Vermiphilaceae	unclassified_Vermiphilaceae	0	0	0	0	0	0	0	0	0	2.74597e-05	0	0	0	0	0	0	0	0	0	0	0	0	0	0	0	0	0	0	0	0	0	0	0	0	0	0
Desulfobacterota	Desulfobaccia	Desulfobaccales	Desulfobaccaceae	Desulfobacca	unclassified_Desulfobacca	0	0	0	0	0	0	0	0	0	0	0	0	0	0	0	0	0	0	0	0	0	0	0	0	0	0	0	0	0	0	0	0	0	0	0	0
Desulfobacterota	Desulfobulbia	Desulfobulbales	Desulfobulbaceae	Desulfobulbus	unclassified_Desulfobulbus	0	0	0	0	0	0	0	0	0	0	0	0	0	0	0	0	4.07338e-05	0	0	0	0	0	0	0	0	0	0	0	0	0	0	0	0	0	0	0
Desulfobacterota	Desulfobulbia	Desulfobulbales	Desulfobulbaceae	unclassified_Desulfobulbaceae	uncultured_Desulfobulbaceae_bacterium	0	0	0	0	0	0	0	0	0	0	0	0	0	0	0	0	0	0	0	0	0	0	0	0	0	0	0	0	0	0	0	0	0	0	0	0
Desulfobacterota	Desulfobulbia	Desulfobulbales	Desulfocapsaceae	Desulfopila	unclassified_Desulfopila	0	0	0	0	0	0	0	0	0	0	0	0	0	0	0	0	0	0	0	0	0	0	0	0	0	0	0	0	0	0	0	0	0	0	0	0
Desulfobacterota	Desulfobulbia	Desulfobulbales	Desulfocapsaceae	unclassified_Desulfocapsaceae	unclassified_Desulfocapsaceae	0	0	0	0	0	0	0	0	0	0	0	0	0	0	0	0	0	0	0	0	0	0	0	0	0	0	0	0	0	0	0	0	2.91694e-05	0	0	0
Desulfobacterota	Desulfovibrionia	Desulfovibrionales	Desulfomicrobiaceae	Desulfomicrobium	unclassified_Desulfomicrobium	0	0	0	0	0	0	0	0	0	0	0	0	0	0	0	0	0	0	0	0	0	0	0	0	0	0	0	0	0	0	0	0	0	0	0	0
Desulfobacterota	Desulfovibrionia	Desulfovibrionales	Desulfovibrionaceae	Bilophila	unclassified_Bilophila	0	0	0	0	0	0	0	0	0	0	0	0	0	0	0	0	0	0	0	0	0	0	2.97261e-05	0	0	0	2.9077e-05	0	0	0	0	0	0	0	0	0
Desulfobacterota	Desulfovibrionia	Desulfovibrionales	Desulfovibrionaceae	Desulfovibrio	Brachyspira_sp._NSH_25	0	0	0	0	0	0	0	0	0	0	0	0	0	0	0	4.11709e-05	0	0	0	0	0	0	0	0	0	0	0	0	0	0	0	0	0	0	0	0
Desulfobacterota	Desulfovibrionia	Desulfovibrionales	Desulfovibrionaceae	Desulfovibrio	Desulfovibrio_bacterium_endosymbiont_of_Onthophagus_Taurus	0	0	0	2.56786e-05	0	0	0	0	0	0	0	0	0	0	0	0	0	0	0	0	0	0	0	0	0	0	0	0	0	0	0	0	0	0	0	0
Desulfobacterota	Desulfovibrionia	Desulfovibrionales	Desulfovibrionaceae	Desulfovibrio	Desulfovibrio_piger	0.00230215	5.31809e-05	0.00105924	0	0	0.00026475	0	0	0	0	0	1.41091e-05	1.3579e-05	0	0	0	0	0	0.00502674	0.00199633	0.00573503	0.00455634	0	0.00803092	4.52523e-05	0.000364958	0	0	0.00429152	0.00588539	0.00542715	0.00013212	0.00453584	0.00161021	0	0.00252575
Desulfobacterota	Desulfovibrionia	Desulfovibrionales	Desulfovibrionaceae	Desulfovibrio	unclassified_Desulfovibrio	0.000894549	0.000106362	0	6.41964e-05	0	7.9425e-05	0	0	0	5.49194e-05	0	0	2.7158e-05	2.64908e-05	6.89009e-05	4.11709e-05	5.43117e-05	0	0.00158816	0.000737773	0.000174229	0.00092003	0.00373062	0.00018047	0.00511351	0.00564955	0.00303854	0.00292411	0.000780277	0.00157829	0.00413911	0.00143864	0.00115219	0.00113311	0.00260172	3.02485e-05
Desulfobacterota	Desulfovibrionia	Desulfovibrionales	Desulfovibrionaceae	Mailhella	Desulfovibrio_sp._Marseille_P3199	0	0	1.34081e-05	0	0	0	0	0	0	0	0	0	0	0	0	0	0	0	0	0.000622043	0.000406534	0.000102226	0.000416165	0.00055645	0.000241346	0.00078831	7.26924e-05	0.000257564	0.000165059	0.000118003	5.78896e-05	0.0001468	0.000116678	0.000253459	0.000176388	0.000347858
Desulfobacterota	Desulfovibrionia	Desulfovibrionales	Desulfovibrionaceae	unclassified_Desulfovibrionaceae	unclassified_Desulfovibrionaceae	9.20859e-05	0	0	0	3.90401e-05	0	0	0	0	0	5.18094e-05	4.23274e-05	0	0	0	0	0	1.31631e-05	5.8281e-05	0	5.80762e-05	0	4.45891e-05	0	0.000241346	0.000160582	2.9077e-05	0.000136357	0	0	0	0	0	0	1.4699e-05	0
Desulfobacterota	Desulfovibrionia	Desulfovibrionales	Desulfovibrionaceae	unclassified_Desulfovibrionaceae	uncultured_Desulfovibrionaceae_bacterium	0	0	0	0	0	0	0	0	0	0	0	0	0	0	0	0	0	0	0	0	0	0	2.97261e-05	0	0	0	0	7.57541e-05	0	0	0	0	0	0	0	0
Desulfobacterota	Desulfovibrionia	Desulfovibrionales	Desulfovibrionaceae	unclassified_Desulfovibrionaceae	uncultured_delta_proteobacterium	0	0	0	0	0	0	0	0	0	0	0	0	0	0	0	0	0	0	0	0	7.25953e-05	0	0	0	0	0	0	0	0	0	0	0	0	0	0	0
Desulfobacterota	Desulfuromonadia	Bradymonadales	uncultured_rumen_bacterium	uncultured_rumen_bacterium	uncultured_rumen_bacterium	0	0	0	1.28393e-05	0	0	0	0	0	0	0	0	0	0	0	0	0	0	0.000101992	0.00418071	0.00339746	0.000350488	0.00279425	0.00236115	0.00025643	0.00243792	0.00581539	0.00209081	0.000135048	0.0125968	0.000173669	0.00162948	0.00215854	0.00105856	0.00374824	0.000211739
Desulfobacterota	Desulfuromonadia	Desulfuromonadales	Desulfuromonadaceae	Desulfuromonas	Desulfuromonas_acetoxidans	0	0	0	0	0	0	0	0	0	0	0	0	0	0	0	0	0	0	0	0	0	0	0	0	0	0	0	0	0	0	0	0	0	0	0	0
Desulfobacterota	Desulfuromonadia	Desulfuromonadales	Desulfuromonadaceae	Desulfuromonas	unclassified_Desulfuromonas	0	0	0	0	0	0	0	0	2.64992e-05	0	0	0	0	0	0	0	0	0	0	0	0	0	0	0	0	0	0	0	0	0	0	0	0	0	0	0
Desulfobacterota	Desulfuromonadia	Desulfuromonadales	Geothermobacteraceae	Geothermobacter	unclassified_Geothermobacter	0	0	0	0	0	0	0	0	0	0	0	0	0	0	0	0	0	0	0	2.89323e-05	0	0	0	0	0	0	0	0	0	0	0	0	0	0	0	0
Desulfobacterota	Desulfuromonadia	Desulfuromonadales	Geothermobacteraceae	Geothermobacter	uncultured_prokaryote	0	0	0	0	0	0	0	0	0	0	0	0	0	0	0	0	0	0	0	0	0	0	0	0	0	0	0	0	0	0	0	0	0	0	0	0
Desulfobacterota	Desulfuromonadia	Geobacterales	Geobacteraceae	unclassified_Geobacteraceae	unclassified_Geobacteraceae	0	0	0	0	0	0	0	0	0	0	0	0	0	0	0	0	0	0	0	0	0	0	0	0	0	0	0	0	0	0	0	0	0	0	0	0
Elusimicrobiota	Elusimicrobia	Elusimicrobiales	Elusimicrobiaceae	Elusimicrobium	unclassified_Elusimicrobium	0	0	0	0	0	0	0	0	0	0	0	0	0	0	0	0	0	0	0	0.000101263	5.80762e-05	0	5.94521e-05	0.00018047	0	0	0	3.03017e-05	0	0	0	0	0	1.49094e-05	0	6.0497e-05
Entotheonellaeota	Entotheonellia	Entotheonellales	Entotheonellaceae	unclassified_Entotheonellaceae	unclassified_Entotheonellaceae	0.000105241	0	0	0	0	0	0	4.00416e-05	0	0	0	0	0	0	0	0	0	0	0	0	0	0	0	0	0	0	0	0	0	0	0	0	0	0	0	0
Fibrobacterota	Fibrobacteria	Fibrobacterales	Fibrobacteraceae	Fibrobacter	Fibrobacter_intestinalis	0	0	0	0	0	0	0	0	0	0	0	0	0	0	0	0	0	0	0	0	7.25953e-05	0.000189848	0.000193219	0.000315823	0	0	0	0	0	4.42511e-05	4.34172e-05	0	0	0	0	0.000196615
Fibrobacterota	Fibrobacteria	Fibrobacterales	Fibrobacteraceae	Fibrobacter	Fibrobacter_sp.	0	0	0	0	0	0	0	0	0	0	0	0	0	0	0	0	0	0	0	0.000216992	8.71143e-05	0	0	0.000120313	0	0	0	0	0	2.95007e-05	7.2362e-05	0	2.91694e-05	0.00022364	0	0
Fibrobacterota	Fibrobacteria	Fibrobacterales	Fibrobacteraceae	Fibrobacter	Fibrobacter_sp._UWB8	0	0	0	0	0	0	0	0	0	0	0	0	0	0	0	0	0	0	0	0	0	0.000102226	0	4.51175e-05	0	0	0	0	0	0	0	0	0	0	0	0
Fibrobacterota	Fibrobacteria	Fibrobacterales	Fibrobacteraceae	Fibrobacter	unclassified_Fibrobacter	0	0	0	0	0	0	0	0	0	0	0	0	0	0	0	0	0	0	0	0.000405052	0	0.000102226	0.000222946	0	3.01682e-05	0.000233573	0	9.0905e-05	0.000150053	0	0	0.00024956	0	7.45468e-05	5.87959e-05	0.000136118
Firmicutes	Bacilli	Acholeplasmatales	Acholeplasmataceae	Anaeroplasma	Anaeroplasma_abactoclasticum	7.89308e-05	0	0	0	0	0	0	0	0	0	0	0	0	0	0	0	0	0	0	0	0	0	0	0	0	0	0	0	0	0	0	0	0	0	0	0
Firmicutes	Bacilli	Acholeplasmatales	Acholeplasmataceae	Anaeroplasma	unclassified_Anaeroplasma	0	0	0	0	0	1.32375e-05	0	0	0	0	0	0	0	0	0	0	0	0	0	0.000650976	0.00113249	0.000365091	7.43152e-05	0.00036094	0	0.00017518	0.00107585	1.51508e-05	0.000660234	0.000324508	0.00036181	0.00027892	4.37541e-05	0.00046219	0.000470367	0.000181491
Firmicutes	Bacilli	Acholeplasmatales	Acholeplasmataceae	Anaeroplasma	uncultured_rumen_bacterium	0	0	0	0	0	0	0	0	0	0	0	0	0	0	0	0	0	0	0	0.000159127	0.000740472	0.000554939	0	0.000496293	0	0	0	0	0	4.42511e-05	0.000217086	7.33999e-05	0	0	0	3.02485e-05
Firmicutes	Bacilli	Acholeplasmatales	Acholeplasmataceae	T2WK15B57	unclassified_T2WK15B57	0	0	0	0	0	0	0	0	0	0	0	0	0	0	0	0	0	0	0	0.000101263	0	0	0	0	0	0	0	0	0	0	0	0	2.91694e-05	0	0	1.51242e-05
Firmicutes	Bacilli	Bacillales	Bacillaceae	Bacillus	Bacillus_infernus	0	0	0	0	0	0	0	0	0	0.000260867	0	0	0	0	0	0	0	0	0	0	0	0	0	0	0	0	0	0	0	0	0	0	0	0	0	0
Firmicutes	Bacilli	Bacillales	Bacillaceae	Bacillus	Limosilactobacillus_vaginalis	2.63103e-05	0	0	0	0	0	0	0	0	0.00306176	0	2.82183e-05	0	0	0.000826811	4.11709e-05	0	6.58155e-05	0	2.89323e-05	2.90381e-05	0	0.000118904	0	0.000120673	0	5.81539e-05	7.57541e-05	0	0.000162254	0	5.87199e-05	0.000189601	2.98187e-05	0	0
Firmicutes	Bacilli	Bacillales	Bacillaceae	Bacillus	unclassified_Bacillus	3.94654e-05	0.000119657	0	0	0	0	4.02868e-05	0	0	0.000672763	0	5.64366e-05	0	5.29815e-05	0.000124022	2.74473e-05	0	6.58155e-05	1.45703e-05	0	0	0	0	0	0	1.45983e-05	0	0	0	0	0	0	0	0	0	0
Firmicutes	Bacilli	Bacillales	Bacillaceae	Geobacillus	unclassified_Geobacillus	0	0	0	0	0	2.6475e-05	0	0	0	0	0	0	0	0	0	0	0	0	0	0	0	0	0	0	0	0	0	0	0	0	0	0	0	0	0	0
Firmicutes	Bacilli	Bacillales	Bacillaceae	Paucisalibacillus	unclassified_Paucisalibacillus	0	0	0	0	0	0	0	0	0	8.23791e-05	0	0	0	0	0	0	0	0	0	0	0	0	0	0	0	0	0	0	0	0	0	0	0	0	0	0
Firmicutes	Bacilli	Bacillales	Bacillaceae	unclassified_Bacillaceae	unclassified_Bacillaceae	0	0	0	0	0	0	0	0	0	5.49194e-05	0	0	0	0	0	0	0	0	0	0	0	0	0	0	0	0	0	0	0	0	0	0	0	0	0	0
Firmicutes	Bacilli	Bacillales	Planococcaceae	Kurthia	unclassified_Kurthia	0	0	0	0	0	0	0	0	0	0	0	0	0	0	0.000124022	0	0	0	0	0	0	0	0	0	0	0	0	0	0	0	0	0	0	0	0	0
Firmicutes	Bacilli	Bacillales	Planococcaceae	Lysinibacillus	unclassified_Lysinibacillus	0	0	0	0	0	0	0	0	0	0	0	0	0	0	0	6.86182e-05	0	0	0	0	0	0	0	0	0	0	0	0	0	0	0	0	0	0	0	0
Firmicutes	Bacilli	Bacillales	Planococcaceae	Paenisporosarcina	unclassified_Paenisporosarcina	0.000407809	0	0	0	0	0	0	0	0	0	0	0	0	0	0	0	0	0	0	0	0	0	0	0	0	0	0	0	0	0	0	0	0	0	0	0
Firmicutes	Bacilli	Bacillales	Planococcaceae	Psychrobacillus	unclassified_Psychrobacillus	0	0	0	0	0	0	0	0	0	0	0	0	0	0	0	0	0	0	0	0	0	0	0	0	0	0	0	0	0	0	0	0	0	0	0	0
Firmicutes	Bacilli	Bacillales	Planococcaceae	Solibacillus	unclassified_Solibacillus	0	0	0	0	0	0	0	0	0	0	0	0	0	0	0	0	4.07338e-05	0	0	0	0	0	0	0	0	0	0	0	0	0	0	0	0	0	0	0
Firmicutes	Bacilli	Bacillales	Planococcaceae	Sporosarcina	unclassified_Sporosarcina	9.20859e-05	0	0	0	0	0	0	0	0	0	0	0	0	0	0	0	0	0	0	0	0	0	0	0	0	0	0	0	0	0	0	0	0	0	0	0
Firmicutes	Bacilli	Bacillales	Planococcaceae	unclassified_Planococcaceae	unclassified_Planococcaceae	3.94654e-05	0	0	0	2.60268e-05	0	0	2.66944e-05	0	0.000356976	0	0	0	0.000132454	0.000289384	0	5.43117e-05	0	0	0	0	0	0	0	0	0	0	0	0	0	0	0	0	0	0	0
Firmicutes	Bacilli	Bacillales	unclassified_Bacillales	unclassified_Bacillales	unclassified_Bacillales	0	0	0	0	0	0	0	0	0	0	0	0	0	3.97362e-05	0	0	0	0	0	0	0	0	0	0	0	0	0	0	0	0	0	0	0	0	0	0
Firmicutes	Bacilli	Erysipelotrichales	Erysipelatoclostridiaceae	Asteroleplasma	Asteroleplasma_anaerobium	0	0	0	0	0	0	0	0	0	0	0	0	0	0	0	0	0	0	7.28513e-05	0	1.45191e-05	0	0	0	1.50841e-05	0	0	0	0	0	0	2.936e-05	0	0	4.40969e-05	0
Firmicutes	Bacilli	Erysipelotrichales	Erysipelatoclostridiaceae	Asteroleplasma	unclassified_Asteroleplasma	0	0	0	0	0	1.32375e-05	0	0	0	0	0	0	0	0	0	0	0	0	2.91405e-05	0	0	0	4.45891e-05	0	1.50841e-05	0.000233573	2.9077e-05	0	1.50053e-05	0	2.89448e-05	0.00017616	0	0	2.93979e-05	0
Firmicutes	Bacilli	Erysipelotrichales	Erysipelatoclostridiaceae	Candidatus_Stoquefichus	unclassified_Candidatus_Stoquefichus	0	0	0	0	0	0	0	0	0	0	0	0	0	0	4.13405e-05	0	0	0	0	4.33984e-05	2.90381e-05	0	2.97261e-05	0.000120313	0	0	0	0	0	0	0	0	0	0	0	0.000438603
Firmicutes	Bacilli	Erysipelotrichales	Erysipelatoclostridiaceae	Catenibacterium	unclassified_Catenibacterium	6.57756e-05	2.65904e-05	0.000107264	0	0	6.61875e-05	0	0	0	0.000576654	0	0	0	0	0.000234263	2.74473e-05	0	0	0.000626521	4.33984e-05	0.00015971	1.46037e-05	0.000371576	0	0.000965382	0.00112407	0.00135208	0.000833295	0.000405144	0	5.78896e-05	0.0002202	0	2.98187e-05	0.000690851	1.51242e-05
Firmicutes	Bacilli	Erysipelotrichales	Erysipelatoclostridiaceae	Coprobacillus	unclassified_Coprobacillus	0	0	0	0	0	0	0	0	0	0	0	0	0	0	0	0	0	0	0	0	0	0	0	0	0	0	0	0	0	0	0	0	0	0	0	0
Firmicutes	Bacilli	Erysipelotrichales	Erysipelatoclostridiaceae	Erysipelatoclostridium	Massilimicrobiota_timonensis	0	0	0	0	0	0	2.68579e-05	0	0	0	0	0	0	0	0	0	0	0	0	0	0	0	0	0	0	0	0	0	0	0	0	0	0	0	0	0
Firmicutes	Bacilli	Erysipelotrichales	Erysipelatoclostridiaceae	Erysipelotrichaceae_UCG_002	unclassified_Erysipelotrichaceae_UCG_002	0	0	9.38564e-05	0.000102714	0	0	0	0	0	0	1.29524e-05	0	0.000719688	0.0154706	0.00212215	0.000219578	0.0173933	0	0	0	0	0	0	0	0	0	0	0	0	0	0.000130252	0	0	0	0	0
Firmicutes	Bacilli	Erysipelotrichales	Erysipelatoclostridiaceae	Erysipelotrichaceae_UCG_003	unclassified_Erysipelotrichaceae_UCG_003	0.000460429	1.32952e-05	5.36322e-05	0	6.50669e-05	2.6475e-05	1.34289e-05	0	0	0.000508005	0	0	0	0	0.000289384	5.48945e-05	2.71558e-05	0	0.000407967	0.000390585	0.000725953	0.000467317	0.000847193	7.51959e-05	0.000135757	0.000540138	7.26924e-05	0.000409072	0.000555197	0.000118003	2.89448e-05	0.000499119	0.000160432	0.000447281	0	0.000362982
Firmicutes	Bacilli	Erysipelotrichales	Erysipelatoclostridiaceae	Sharpea	unclassified_Sharpea	0	0	0.000147489	0.000102714	3.90401e-05	0	1.34289e-05	0	0	4.11896e-05	0	0	4.07371e-05	0.000238417	0	2.74473e-05	0.000108623	0	0	0	0	2.92073e-05	0	0	0	0	0	0	0	0	0	0	0	0	0	0
Firmicutes	Bacilli	Erysipelotrichales	Erysipelatoclostridiaceae	UCG_004	unclassified_UCG_004	0	0	0	0	0	2.6475e-05	0	0	0	0	0	0	0	0	0	0	0	0	0.000509959	0.00162021	0.000958258	0.000584146	0.0014863	0.00106778	0.000165925	0.00186859	0.001134	0.000863597	0.00202572	0.00160779	0.000231559	0.002202	0.000977175	0.00192331	0.00123471	0.000816709
Firmicutes	Bacilli	Erysipelotrichales	Erysipelatoclostridiaceae	UCG_004	unidentified_rumen_bacterium_RFN74	0	0	0	0	0	0	0	0	0	0	0	0	0	0	0	0	0	0	0	0.000173594	0.000261343	4.3811e-05	0.000178356	0	0	4.3795e-05	2.9077e-05	6.06033e-05	0.000165059	5.90014e-05	4.34172e-05	0.00019084	2.91694e-05	0.000432371	0	0
Firmicutes	Bacilli	Erysipelotrichales	Erysipelatoclostridiaceae	unclassified_Erysipelatoclostridiaceae	unclassified_Erysipelatoclostridiaceae	0	0	0	0	0	0	0	0	0	0	0	0	0	0	0	0	0	0	2.91405e-05	2.89323e-05	2.90381e-05	4.3811e-05	0.000104041	0	0	8.759e-05	1.45385e-05	4.54525e-05	0.000165059	0	0	0.00010276	1.45847e-05	0	0.00027928	0
Firmicutes	Bacilli	Erysipelotrichales	Erysipelatoclostridiaceae	unclassified_Erysipelatoclostridiaceae	uncultured_Erysipelotrichaceae_bacterium	0	0	0	0	0	0	0	0	0	0	0	0	0	0	0	0	0	0	0	0	0.000145191	5.84146e-05	0	0.000105274	0	0	0	0	0	0.000118003	0	0	2.91694e-05	0	0	0.000181491
Firmicutes	Bacilli	Erysipelotrichales	Erysipelotrichaceae	Breznakia	unclassified_Breznakia	0	0	0	0	0	0	0	0	0	0	0	0	0	0	0	0	0	0	0	0	0	0	0	0	0	0	0	0	0	2.95007e-05	0	0	0	0	0	0
Firmicutes	Bacilli	Erysipelotrichales	Erysipelotrichaceae	Catenisphaera	unclassified_Catenisphaera	0.000473585	0.000132952	0.000134081	0	1.30134e-05	0.000145612	0	0	0	0.000686493	0	0	0	6.62269e-05	0.000468526	0.000178407	0.000448071	0	0.00963094	0.000593111	8.71143e-05	0.000350488	0.00153089	0.000150392	0.000814541	0.0052554	0.00252969	0.00269685	0.0011254	0.000280257	0.000217086	0.000337639	0.000452126	0.00101384	0.00204316	0.000483976
Firmicutes	Bacilli	Erysipelotrichales	Erysipelotrichaceae	Catenisphaera	uncultured_rumen_bacterium	0	0	0	1.28393e-05	0	0	0	0	0	5.49194e-05	0	0	0	7.94723e-05	0	0	0.000149357	0	0	0	0	0	0	0	0	0	0	0	0	0	0	0	0	0	0	0
Firmicutes	Bacilli	Erysipelotrichales	Erysipelotrichaceae	Dielma	unclassified_Dielma	0.000697222	0	1.34081e-05	0.000205428	0.000143147	0.000145612	2.68579e-05	0	0	5.49194e-05	3.88571e-05	0	4.07371e-05	0	0	0.000164684	0	0	0.000349686	0	0	0	2.97261e-05	0	0.00092013	0.000759113	0.000625154	0.000409072	0	0.000309757	8.68345e-05	0	0	0	0.000205786	0
Firmicutes	Bacilli	Erysipelotrichales	Erysipelotrichaceae	Dubosiella	Dubosiella_newyorkensis	0	0	0	0	0	0	4.02868e-05	0	0	0	0	0	0	0	0	0	0	0	0	0	0	0	0	0	0	0	0	0	0	0	0	0	0	0	0	0
Firmicutes	Bacilli	Erysipelotrichales	Erysipelotrichaceae	Dubosiella	unclassified_Dubosiella	0	0	0	0	0	0	0	4.00416e-05	0	0	0	0	0	0	0	0	0	0	0	0	0	0	0	0	0	0	0	0	0	0	0	0	0	0	0	0
Firmicutes	Bacilli	Erysipelotrichales	Erysipelotrichaceae	Erysipelothrix	unclassified_Erysipelothrix	0.00176279	0.000226019	6.70403e-05	5.13571e-05	0	0.000145612	0	0	0	2.74597e-05	0	0	2.7158e-05	0	9.64613e-05	0	0	0	0	0	0	0	0	0	0	0	0	0	0	0	0	0	0	0	0	0
Firmicutes	Bacilli	Erysipelotrichales	Erysipelotrichaceae	Erysipelotrichaceae_UCG_006	unclassified_Erysipelotrichaceae_UCG_006	0.000802463	2.65904e-05	0	0	0	0.000119137	0	0	0	0.00134553	0	0	6.78951e-05	0.000331135	0.000206703	9.60654e-05	9.50454e-05	0	0.00058281	8.67968e-05	7.25953e-05	0	0.000326987	0	0.00153858	0.00128465	0.000915924	0.000454525	0	0.000147504	0.000202614	0.0002202	7.29235e-05	0	0.000293979	0
Firmicutes	Bacilli	Erysipelotrichales	Erysipelotrichaceae	Erysipelotrichaceae_UCG_009	unclassified_Erysipelotrichaceae_UCG_009	0	0	0	0	0	0	0	0	0	0	0	0	0	0	0	4.11709e-05	0	0	0	0	0	0	0	0	0	0	0	0	0	0	0	0	0	0	0	0
Firmicutes	Bacilli	Erysipelotrichales	Erysipelotrichaceae	Erysipelotrichaceae_UCG_009	uncultured_rumen_bacterium	0	0	0	5.13571e-05	0	0	0	0	0	0.000398166	0	0	2.7158e-05	0	0	8.23418e-05	0	0	0	0	0	0	0	0	0.000829625	0	0	0	0	0	0	0	0	0	0	0
Firmicutes	Bacilli	Erysipelotrichales	Erysipelotrichaceae	Faecalibaculum	unclassified_Faecalibaculum	0	0	0	0	0	0	8.05737e-05	0	0	0	0	0	0	0	0	0	0	0	0	0	0	0	0	4.51175e-05	0	0	0	0	0	0	0	0	0	0	0	0
Firmicutes	Bacilli	Erysipelotrichales	Erysipelotrichaceae	Holdemanella	unclassified_Holdemanella	0.00124974	0.000106362	0.000201121	2.56786e-05	0	0.000225037	0	0	2.64992e-05	0.00185353	0	0	5.43161e-05	0.000105963	0.000344504	0.000109789	0.000285136	0	0.00576982	0.000144661	4.35572e-05	0	0.00034185	0	0.00273022	0.00237953	0.00248608	0.000757541	0.000510181	0.000103252	0.000115779	0.0017616	0.000131262	2.98187e-05	0.000676152	0
Firmicutes	Bacilli	Erysipelotrichales	Erysipelotrichaceae	Ileibacterium	Ileibacterium_valens	0	0	0	0	0	0	0	0	0	0	0	0	0	2.64908e-05	0	0	0	0	0	0	0	0	0	0	0	0	0	0	0	0	0	0	0	0	0	0
Firmicutes	Bacilli	Erysipelotrichales	Erysipelotrichaceae	Solobacterium	Solobacterium_moorei	9.20859e-05	0	0	0.000115554	3.90401e-05	6.61875e-05	0	0	0	0	0	0	0	2.64908e-05	0	0.000192131	0	0	0	0	0	0	0	0	0	0	0	0	0	0	0	0	0	0	0	0
Firmicutes	Bacilli	Erysipelotrichales	Erysipelotrichaceae	Solobacterium	unclassified_Solobacterium	0.00149968	0.000119657	0.000254753	6.41964e-05	5.20535e-05	0.000555975	8.05737e-05	0	0	0.00207321	0	0	9.50532e-05	0.000556306	0.000950832	5.48945e-05	0.000678896	0	0.00757653	0.00215545	0.0012196	0.00092003	0.0024524	0.000932429	0.00276039	0.00502182	0.00334385	0.00174235	0.00324115	0.00172579	0.00138935	0.00306812	0.000977175	0.00153566	0.00241063	0.000831834
Firmicutes	Bacilli	Erysipelotrichales	Erysipelotrichaceae	Turicibacter	unclassified_Turicibacter	0.013826	0.0374393	0.0170014	0.00311994	0.0382333	0.011371	0.00733221	0.0335949	0.0390996	0.0503199	0.032096	0.00150968	0.08677	0.0165435	0.0273261	0.0127355	0.0450651	0.0217323	0.00187956	0.000781171	0.000551724	0.00092003	0.00361172	0.00120313	0.00241346	0.00197077	0.00427431	0.00124237	0.00276098	0.000118003	0.00199719	0.00204052	0.00099176	0.00214695	0.0013817	0.00116457
Firmicutes	Bacilli	Erysipelotrichales	Erysipelotrichaceae	ZOR0006	Firmicutes_bacterium_ZOR0006	0	0	0	0	0	0	0	0	0	0	0	0	0	0	0	0	0	0	0	0	0	0	0	0	0	0	0	0	0	0	0	0	0	0	0	0
Firmicutes	Bacilli	Erysipelotrichales	Erysipelotrichaceae	ZOR0006	unclassified_ZOR0006	0	0	0	0	0	0	0	0	0	0	0	0	0	0	0	0	4.07338e-05	0	0	0	0	0	0	0	0	0	0	0	0	0	0	0	0	0	0	0
Firmicutes	Bacilli	Erysipelotrichales	Erysipelotrichaceae	[Anaerorhabdus]_furcosa_group	unclassified_[Anaerorhabdus]_furcosa_group	2.63103e-05	0.000106362	0	0	3.90401e-05	9.26625e-05	1.34289e-05	0	0	0.00101601	0	0	0	0.000132454	0.000468526	4.11709e-05	0.000162935	0	0.000262265	0.00162021	0.00207623	0.00147497	0.00141199	0.00154904	0.00105589	0.00255471	0.00107585	0.000712089	0.00124544	0.00123903	0.00131699	0.00010276	0.00125428	0.00104365	0.000617357	0.00145193
Firmicutes	Bacilli	Erysipelotrichales	Erysipelotrichaceae	unclassified_Erysipelotrichaceae	Erysipelotrichaceae_bacterium_canine_oral_taxon_255	0	0	0	0	0	5.295e-05	4.02868e-05	0	0	0	0	0	0	0	0	0.000260749	0	0	0	0	0	0	0	0	0	0	0	0	0	0	0	0	0	0	0	0
Firmicutes	Bacilli	Erysipelotrichales	Erysipelotrichaceae	unclassified_Erysipelotrichaceae	Erysipelotrichaceae_bacterium_canine_oral_taxon_317	0	0	0	0	0	0	0	0	0	0	0	0	0.000162948	0	0	0	0	0	0	0	0	0	0	0	0	0	0	0	0	0	0	0	0	0	0	0
Firmicutes	Bacilli	Erysipelotrichales	Erysipelotrichaceae	unclassified_Erysipelotrichaceae	unclassified_Erysipelotrichaceae	0.00730109	0.000664761	0.000429058	0.00644532	0.0020431	0.00419629	0.000684876	0	5.29984e-05	0.00531345	0.000155428	0.000183419	0.000190106	0.000807968	0.00308676	0.00194876	0.00146642	0.000118468	0.00590095	0.0034574	0.00166969	0.00604591	0.00444405	0.00679771	0.00113131	0.0112553	0.00539377	0.00506038	0.0106088	0.0103547	0.0121424	0.00491779	0.00826953	0.00809578	0.00524753	0.00353907
Firmicutes	Bacilli	Erysipelotrichales	Erysipelotrichaceae	unclassified_Erysipelotrichaceae	uncultured_Solobacterium_sp.	0.000328878	0.000146247	0.000160897	0	0	0.00101929	0	0	0	0	0	0	0	0	0.000179142	0	0	0	0.000845075	0.00135982	0.00104537	0.00113909	0.0006837	0.000345901	0.000573196	0.00118246	0.00311123	0.000772692	0.00120043	0.000590014	0.00170774	0.00148268	0.000641727	0.00193822	0.000749647	0.000468852
Firmicutes	Bacilli	Erysipelotrichales	unclassified_Erysipelotrichales	unclassified_Erysipelotrichales	unclassified_Erysipelotrichales	0	0	0	0	0	0	0	0	0	0	0	0	0	0	5.51207e-05	0	0	0	0	2.89323e-05	0.000203267	5.84146e-05	0	0.000105274	0	0	0	0	0	0.000398259	7.2362e-05	0	0	0	0	0.00010587
Firmicutes	Bacilli	Izemoplasmatales	unclassified_Izemoplasmatales	unclassified_Izemoplasmatales	unclassified_Izemoplasmatales	0	0	0	0	0	0	0	0	0	0	0	0	0	0	0	0	0	0	0	2.89323e-05	0.000232305	0.000204451	0.000252672	0	1.50841e-05	0	0	6.06033e-05	0	1.47504e-05	2.89448e-05	0	0.000102093	0	0	9.07455e-05
Firmicutes	Bacilli	Izemoplasmatales	uncultured_Firmicutes_bacterium	uncultured_Firmicutes_bacterium	uncultured_Firmicutes_bacterium	0	0	0	0	0	0	0	0	0	0	0	0	0	0	0	0	0	0	0	5.78645e-05	0.000130672	4.3811e-05	0	6.01567e-05	0	2.91967e-05	0	0	0	0	0	0	5.83388e-05	0	0	0
Firmicutes	Bacilli	Izemoplasmatales	uncultured_compost_bacterium	uncultured_compost_bacterium	uncultured_compost_bacterium	0	0	0	0	0	0	0	0	0	0	0	0	0	0	0	0	0	0	0	0	0	0	0	0	0	0	0	0	0	0	0	0	0	0	0	3.02485e-05
Firmicutes	Bacilli	Izemoplasmatales	uncultured_rumen_bacterium	uncultured_rumen_bacterium	uncultured_rumen_bacterium	0	0	0	0	0	0	0	0	0	0	0	0	0	0	0	0	0	0	0	2.89323e-05	4.35572e-05	8.76219e-05	0	0.000120313	0	4.3795e-05	0	0	3.00107e-05	1.47504e-05	0	2.936e-05	0.000102093	0	2.93979e-05	0
Firmicutes	Bacilli	Lactobacillales	Aerococcaceae	Aerococcus	Aerococcus_suis	0	0.000385561	0.000844708	0	0	0.00546708	0	0	0	0.000137299	0	0	0	0	0	0	0	0	0	0	2.90381e-05	0	0	3.00784e-05	0	0	0	0	0	0	0	0	0	0	0	0
Firmicutes	Bacilli	Lactobacillales	Aerococcaceae	Aerococcus	Aerococcus_vaginalis	0	0	0	0	0	0	0	0	0	0	0	0	0	0	0	0	0	0	0	0	0	0	0	0	0	0	0	0	0	0	0	0	0	0	0	0
Firmicutes	Bacilli	Lactobacillales	Aerococcaceae	Aerococcus	unclassified_Aerococcus	0.00284151	0.000837599	0.000630179	0.000154071	0	0.00125756	2.68579e-05	6.67361e-05	3.97488e-05	0.000398166	0	0	0	0.000145699	0.000124022	0	0.000108623	0	0	0	0	0	4.45891e-05	0	0	0	0	0	0	0	0	0	0	0	0	0
Firmicutes	Bacilli	Lactobacillales	Aerococcaceae	Facklamia	Facklamia_tabacinasalis	0	0	0	0	0	0	0	1.33472e-05	0	0	0	0	0	0.000119208	0	0	0	0	0	0	0	0	0	0	0	0	0	0	0	0	0	0	0	0	0	0
Firmicutes	Bacilli	Lactobacillales	Aerococcaceae	Facklamia	unclassified_Facklamia	0.00476216	0	0.000174305	6.41964e-05	0	0.0005295	0	0	0	0.000411896	0	0	0	0	5.51207e-05	0	0.000488805	0	0	0	0	0	0	0	0	0	0	0	0	0	0	0	0	0	0	0
Firmicutes	Bacilli	Lactobacillales	Aerococcaceae	Globicatella	Globicatella_sp._canine_oral_taxon_218	0.000184172	0	0	0.000256786	0.000455468	0.000238275	0	0	0	0	3.88571e-05	0	0	0	0	0	0.000149357	3.94893e-05	0	0	0	0	0	0	0	0	0	0	0	0	0	0	0	0	0	0
Firmicutes	Bacilli	Lactobacillales	Aerococcaceae	Globicatella	unclassified_Globicatella	0.00431488	0	2.68161e-05	0	0	0.00135022	0	0	0	9.6109e-05	0	0	0	0	0	0	0	0	0	0	0	0	0	0	0	0	0	0	0	0	0	0	0	0	0	0
Firmicutes	Bacilli	Lactobacillales	Aerococcaceae	Ignavigranum	unclassified_Ignavigranum	0.00406493	1.32952e-05	0.000120673	0.000231107	0	0.0004236	0	0	0	0.000302057	0	0	0	0	4.13405e-05	0	0.000108623	0	0	0	0	0	0	0	0	0	0	0	0	0	0	0	0	0	0	0
Firmicutes	Bacilli	Lactobacillales	Aerococcaceae	unclassified_Aerococcaceae	unclassified_Aerococcaceae	0.00270996	5.31809e-05	0	0.000231107	0	2.6475e-05	0	0	5.29984e-05	0.000219678	0	0	0	0	0	0	0	0	0	0	0	0	0	0	0	0	0	0	0	0	0	0	0	0	0	0
Firmicutes	Bacilli	Lactobacillales	Carnobacteriaceae	Allofustis	unclassified_Allofustis	0	3.98857e-05	0.000281569	0	0	2.6475e-05	1.34289e-05	0	0	2.74597e-05	0	0	1.3579e-05	0	0	0	1.35779e-05	0	0	0	0	0	0	0	0	0	0	0	0	0	0	0	1.45847e-05	0	0	0
Firmicutes	Bacilli	Lactobacillales	Carnobacteriaceae	Alloiococcus	Alloiococcus_bacterium__1_from_Psoroptes_ovis	0	0	0	0	0	0	0	0	0	0	0	0	0	0	0	0	5.43117e-05	0	0	0	0	0	0	0	0	0	0	0	0	0	0	0	0	0	0	0
Firmicutes	Bacilli	Lactobacillales	Carnobacteriaceae	Atopostipes	unclassified_Atopostipes	0.000420964	0	9.38564e-05	0	1.30134e-05	0	0	0	0	0.000260867	0	0	0	6.62269e-05	5.51207e-05	0	0.00253907	0	0	0	0	0	0	0	0	0	0	0	0	0	0	0	0	0	0	0
Firmicutes	Bacilli	Lactobacillales	Carnobacteriaceae	Carnobacterium	Carnobacterium_maltaromaticum	0	0	0.00337883	0	0	0	0	0	0	0	0	0	0	0	0	0	0	0	0	0	0	0	0	0	0	0	0	0	0	0	0	0	0	0	0	0
Firmicutes	Bacilli	Lactobacillales	Carnobacteriaceae	Carnobacterium	Carnobacterium_sp._CP1	0	0	0	0	0	0	0	0	0	8.23791e-05	0	0	0	0	0	0	0	0	0	0	0	0	0	0	0	0	0	0	0	0	0	0	0	0	0	0
Firmicutes	Bacilli	Lactobacillales	Carnobacteriaceae	Carnobacterium	unclassified_Carnobacterium	0.000236792	0	0	0	0	0	0	0	0	0.000576654	0	0	0	0	0	0	0	0	0	0	0	0	0	0	0	0	0	0	0	0	0	0	0	0	0	0
Firmicutes	Bacilli	Lactobacillales	Carnobacteriaceae	Desemzia	unclassified_Desemzia	0	0	0	0	0	0	0	0	0	0	0	0	0	0	0.000124022	0	0	0	0	0	0	0	0	0	0	0	0	0	0	0	0	0	0	0	0	0
Firmicutes	Bacilli	Lactobacillales	Carnobacteriaceae	Granulicatella	unclassified_Granulicatella	0.000342033	0	0	0	0	0.00015885	5.37158e-05	0	0	0	0	0	8.14741e-05	0	0	0	0	0	0	0	0	0	0	0	0	0	0	0	0	0	0	0	0	0	0	0
Firmicutes	Bacilli	Lactobacillales	Carnobacteriaceae	Jeotgalibaca	Jeotgalibaca_dankookensis	0	1.32952e-05	0	0	0	1.32375e-05	0	0	0	0.00252629	0	0	0	0	0.000358285	0.000137236	0.000122201	0	0	0	0	0	0	0	0	0	0	0	0	0	0	0	0	0	0	0
Firmicutes	Bacilli	Lactobacillales	Carnobacteriaceae	Jeotgalibaca	unclassified_Jeotgalibaca	0.00424911	0	0	2.56786e-05	0	0	0	0	0	0.000260867	0	0	0	0	0	0	0	0	0	0	0	0	0	0	0	0	0	0	0	0	0	0	0	0	0	0
Firmicutes	Bacilli	Lactobacillales	Carnobacteriaceae	Trichococcus	unclassified_Trichococcus	0	0	2.68161e-05	0	0	0	0	0	0	0	0	0	0	0	0	0	0	0	0	0	0	0	0	0	0	0	0	0	0	0	0	0	0	0	0	0
Firmicutes	Bacilli	Lactobacillales	Carnobacteriaceae	unclassified_Carnobacteriaceae	unclassified_Carnobacteriaceae	0	0	0	0	2.60268e-05	7.9425e-05	0	0	0	0.000123569	0	0	0	0	0	0	0.000488805	0	0	0	0	0	0	0	0	0	0	0	0	0	0	0	0	0	0	0
Firmicutes	Bacilli	Lactobacillales	Enterococcaceae	Enterococcus	Enterococcus_cecorum	0	0	0	0	0	0	0	0	0	0.000137299	0	0	0	0	0	0	0	0	0	0	0	0	0	0	0	0	0	0	3.00107e-05	0	0	0	0	0	0	0
Firmicutes	Bacilli	Lactobacillales	Enterococcaceae	Enterococcus	unclassified_Enterococcus	0.00285466	0.000784418	0.00710627	0.00105282	0	0.0006354	8.05737e-05	0	5.29984e-05	0	0	0	0	0	0	8.23418e-05	0	0	0	0	0	0	2.97261e-05	7.51959e-05	0	0	0	0	0	0	0	0	0	0	0	0
Firmicutes	Bacilli	Lactobacillales	Lactobacillaceae	Amylolactobacillus	Amylolactobacillus_amylotrophicus	0.00165755	0.000425447	0.000107264	0.00053925	0	0.000555975	0	0	0	0	0	0	0	0	0	0	0	0	0	0	0	0	0	0	0	0	0	0	0	0	0	0	0	0	0	0
Firmicutes	Bacilli	Lactobacillales	Lactobacillaceae	Amylolactobacillus	unclassified_Amylolactobacillus	0	0	0	0	0	0	0	0	0	0.000164758	0	0	0	0	0	2.74473e-05	0	0	0	0	0	0	0	0	0	0	0	0	0	0	0	0	0	0	0	0
Firmicutes	Bacilli	Lactobacillales	Lactobacillaceae	Companilactobacillus	Companilactobacillus_alimentarius	0	0	0	0.00196441	0	0	0	0	0	0	0	0	0	0	0	0	0	0	0	0	0	0	0	0	0	0	0	0	0	0	0	0	0	0	0	0
Firmicutes	Bacilli	Lactobacillales	Lactobacillaceae	Companilactobacillus	Companilactobacillus_allii	0	0	0	0.0010785	0	0	0	0	0	0	0	0	0	0	0	0	0	0	0	0	0	0	0	0	0	0	0	0	0	0	0	0	0	0	0	0
Firmicutes	Bacilli	Lactobacillales	Lactobacillaceae	Companilactobacillus	unclassified_Companilactobacillus	0.000171017	0.000252609	0.000522914	0.0222633	1.30134e-05	0	0	4.00416e-05	0	4.11896e-05	0	0	0.000285159	3.97362e-05	0	0	0	0	0	0	0	1.46037e-05	0	0	0	0	0	0	0	2.95007e-05	0	0	0	0	0	0
Firmicutes	Bacilli	Lactobacillales	Lactobacillaceae	Lacticaseibacillus	Lacticaseibacillus_camelliae	0	0	0	0.0013738	0	0	0	0	0	0	0	0	0	0	0	0	0	0	0	0	0	0	0	0	0	0	0	0	0	0	0	0	0	0	0	0
Firmicutes	Bacilli	Lactobacillales	Lactobacillaceae	Lacticaseibacillus	unclassified_Lacticaseibacillus	0	0	6.70403e-05	0	0	0	0	0	0	0	0	0	0	0	0	0	0	0	0	0	0	2.92073e-05	0	0	0	0	0	0	0	0	0	0	0	0	0	0
Firmicutes	Bacilli	Lactobacillales	Lactobacillaceae	Lactiplantibacillus	unclassified_Lactiplantibacillus	0.000342033	0	0.000308385	0.00518707	0	3.97125e-05	0	0	0	9.6109e-05	0	0	0.000258001	2.64908e-05	0	0	0	0	0	2.89323e-05	0	0	0	0	0	0	0	0	0	0	2.89448e-05	0	0	0	0	0
Firmicutes	Bacilli	Lactobacillales	Lactobacillaceae	Lactobacillus	unclassified_Lactobacillus	0.0938224	0.00659443	0.00726717	0.0589323	0.000598615	0.00174735	0.000308866	0.000280292	0.000755227	0.0571025	0.00322514	0.11372	0.0014258	0.00609288	0.0117958	0.00233302	0.0105772	0.00017112	0.0454738	0.0390875	0.0191797	0.015363	0.0236174	0.00443656	0.0824647	0.0345542	0.0220258	0.0971926	0.00396141	0.155424	0.00644022	0.0873605	0.0244294	0.0081256	0.0159778	0.000665467
Firmicutes	Bacilli	Lactobacillales	Lactobacillaceae	Lapidilactobacillus	Lapidilactobacillus_dextrinicus	0	0	0	0.00052641	0	0	0	0	0	0.000329516	0	0	0	0	0	0	0	0	0	0	0	0	0	0	0	0	0	0	0	0	0	0	0	0	0	0
Firmicutes	Bacilli	Lactobacillales	Lactobacillaceae	Lapidilactobacillus	unclassified_Lapidilactobacillus	0	0.000106362	0	0.000320982	0	0	0	0	0	0	0	0	0	0	0	0	0	0	0	0	0	0	0	0	0	0	0	0	0	0	0	0	0	0	0	0
Firmicutes	Bacilli	Lactobacillales	Lactobacillaceae	Lapidilactobacillus	uncultured_compost_bacterium	0	0	0	0.000487893	0	0.000145612	0	0	0	0	0	0	0	0	0	0	0	0	0	0	0	0	0	0	0	0	0	0	0	0	0	0	0	0	0	0
Firmicutes	Bacilli	Lactobacillales	Lactobacillaceae	Latilactobacillus	unclassified_Latilactobacillus	0	0	0.000160897	0	0	0	0	0	0	9.6109e-05	0	0	0	0	4.13405e-05	0	5.43117e-05	0	0	0	0	0	0	0	0	4.3795e-05	5.81539e-05	0	0	0	0	0	0	0	0	0
Firmicutes	Bacilli	Lactobacillales	Lactobacillaceae	Leuconostoc	Leuconostoc_carnosum	0	0	0	0	0	0	0	0	0	0	0	0	0	0	0	0	0	0	0	0	0	0	0	0	0	0	0	0	0	8.85021e-05	0	0	0	0	0	0
Firmicutes	Bacilli	Lactobacillales	Lactobacillaceae	Leuconostoc	unclassified_Leuconostoc	0.000131551	0.000132952	5.36322e-05	5.13571e-05	0	0	0	0	0	2.74597e-05	0	0	8.14741e-05	0	0	0	0	0	0	0	0	0	0	0	0	0	0	0	4.5016e-05	0	0	0	0	0	0	0
Firmicutes	Bacilli	Lactobacillales	Lactobacillaceae	Levilactobacillus	Levilactobacillus_koreensis	0	0	0	0.000744678	0	0	0	0	0	0	0	0	0	0	0	0	0	0	0	0	0	0	0	0	0	0	0	0	0	0	0	0	0	0	0	0
Firmicutes	Bacilli	Lactobacillales	Lactobacillaceae	Levilactobacillus	Levilactobacillus_parabrevis	0	0	0	0.000218268	0	0	0	0	0	0	0	0	0	0	0	0	0	0	0	0	0	0	0	0	0	0	0	0	0	0	0	0	0	0	0	0
Firmicutes	Bacilli	Lactobacillales	Lactobacillaceae	Levilactobacillus	Levilactobacillus_zymae	0	0	0	0.00557225	0	0	0	0	0	0	0	0	0	0	0	0	0	0	0	0	0	0	0	0	0	0	0	0	0	0	0	0	0	0	0	0
Firmicutes	Bacilli	Lactobacillales	Lactobacillaceae	Levilactobacillus	unclassified_Levilactobacillus	0	0	0	0.00270909	0	0	0	0	0	0	0	0	0	0	2.75604e-05	0	0.000149357	0	1.45703e-05	0	0	0	0	0	0	0	0	0	0	0	0	0	0	0	0	0
Firmicutes	Bacilli	Lactobacillales	Lactobacillaceae	Ligilactobacillus	Ligilactobacillus_agilis	0	0	0	0	0	0	0	0	0	0	0	0.00150968	0	0	6.89009e-05	0	0	0	0	0	0	0	0	0	0	0	0	0	0	0.00082602	0	0	0	0	0	0
Firmicutes	Bacilli	Lactobacillales	Lactobacillaceae	Ligilactobacillus	Ligilactobacillus_ruminis	0	0	2.68161e-05	0	0	0	0	0	0	0	0	0	0	0	0	0	0	0	0	0	0	0	0	0	0.000392186	4.3795e-05	0	0	0	0.000147504	0	0	0	0	0	0
Firmicutes	Bacilli	Lactobacillales	Lactobacillaceae	Ligilactobacillus	Ligilactobacillus_salivarius	0	0	0	0	0	0	0	0	0	0.000137299	0	0	0	0	0	0	0	0	0	4.33984e-05	0	0	0	0	0	0	0	0	0	0	0	0	0	0	0	0.000181491
Firmicutes	Bacilli	Lactobacillales	Lactobacillaceae	Ligilactobacillus	unclassified_Ligilactobacillus	0	0	5.36322e-05	0.000436535	0	0	9.40026e-05	0	5.29984e-05	0.000247137	0	0	0	0	0	0	0	0	0.000305975	0	0	2.92073e-05	0	0	0	0	0.000756001	0.000151508	0	0	0	0	0.000306279	2.98187e-05	0	0
Firmicutes	Bacilli	Lactobacillales	Lactobacillaceae	Limosilactobacillus	Lactobacillus_sp._C30An8	0	0	0	0	0	0	0	0	0	0	0	0	0	0	0	0	0	0	0	0	0	0	0	0	0	0	0	0	3.00107e-05	5.90014e-05	0	2.936e-05	7.29235e-05	0.000104365	0	0
Firmicutes	Bacilli	Lactobacillales	Lactobacillaceae	Limosilactobacillus	Limosilactobacillus_mucosae	0	0	0	0	0	0	0	0	0	0.00108466	0	0	0	0	0	0	0	0	0	0	0	0	0	0	0	0	0	0	0	0.000604764	0	0	0	0	0	0
Firmicutes	Bacilli	Lactobacillales	Lactobacillaceae	Limosilactobacillus	unclassified_Limosilactobacillus	0	0	0	0	0	0	0	0	0	6.86493e-05	0	0	0	0	0	0	0	0	0	0	0	0	0	0	0	0	0	6.06033e-05	0	0	0	0	0	0	0	0
Firmicutes	Bacilli	Lactobacillales	Lactobacillaceae	Loigolactobacillus	Loigolactobacillus_coryniformis	0.000210482	0.000452037	0	0	0	0	0	0	0	0	0	0	0	0	0	0	0	0	0	0	0	0	0	0	0	0	0	0	0	0	0	0	0	0	0	0
Firmicutes	Bacilli	Lactobacillales	Lactobacillaceae	Loigolactobacillus	Loigolactobacillus_rennini	0	0	0	8.98749e-05	0	0	0	0	0	0	0	0	0	0	0	0	0	0	0	0	0	0	0	0	0	0	0	0	0	0	0	0	0	0	0	0
Firmicutes	Bacilli	Lactobacillales	Lactobacillaceae	Loigolactobacillus	unclassified_Loigolactobacillus	0	0	0.000201121	0.00252934	0	0.0001059	0	0	0	0	0	0	0.00027158	0	0	0	0	0	0	0	0	0	0	0	0	0	0	0	0	0	0	0	0	0	0	0
Firmicutes	Bacilli	Lactobacillales	Lactobacillaceae	Paucilactobacillus	unclassified_Paucilactobacillus	0.000473585	2.65904e-05	0	0.000770357	0	5.295e-05	0	0	0	0	0	0	0.00013579	0	0	0	0	0	0	0	0	0	0	0	0	4.3795e-05	0	0	0	0	0	0	0	0	0	0
Firmicutes	Bacilli	Lactobacillales	Lactobacillaceae	Pediococcus	unclassified_Pediococcus	0	0	0	0.000269625	0	0	0	0	0	0	0	0	0	0	0	0	0	0	0	0	0	0	0	0	0	0	0	0	0	0	0	0	0	0	0	0
Firmicutes	Bacilli	Lactobacillales	Lactobacillaceae	Secundilactobacillus	Secundilactobacillus_oryzae	0	0	0	0.00231107	0	0	0	0	0	0	0	0	0	0	0	0	0	0	0	0	0	0	0	0	0	0	0	0	0	0	0	0	0	0	0	0
Firmicutes	Bacilli	Lactobacillales	Lactobacillaceae	Secundilactobacillus	unclassified_Secundilactobacillus	0	0	0	0.0056236	0	0	0	0	0	0	0	0	0	0	0	0	0	0	0	0	0	0	0	0	0	0	0	0	0	0	0	0	0	0	0	0
Firmicutes	Bacilli	Lactobacillales	Lactobacillaceae	Weissella	Weissella_jogaejeotgali	0	0.00127634	0.000616771	0.00128393	0	0.000344175	0	0	6.6248e-05	9.6109e-05	0	0	0	0.000119208	2.75604e-05	0	0	0	0	0	0	0	0.000163493	6.01567e-05	0	0	0	0	0	0	0	0	0	0	0	0
Firmicutes	Bacilli	Lactobacillales	Lactobacillaceae	Weissella	Weissella_paramesenteroides	0	0	0.000844708	0.00273477	0	0	0	0	0	0	0	0	0	0	0	0	0	0	0	0	0	0.000175244	0	0	0	0	0	0	0	0	0	0	0	0	0	0
Firmicutes	Bacilli	Lactobacillales	Lactobacillaceae	Weissella	Weissella_viridescens	0	0	0	0	0	0	0	0	0	0	0	0	0	0	0	0	0	3.94893e-05	0	0	0	0	0	0	0	0	0	0	0	7.37518e-05	0	0	0	0	0	0
Firmicutes	Bacilli	Lactobacillales	Lactobacillaceae	Weissella	unclassified_Weissella	0.000315723	0.00058499	0	0	0	0	0	0.000146819	0	0	0	0	6.78951e-05	0	0	0	4.07338e-05	6.58155e-05	0	0	8.71143e-05	0	0	0	0	1.45983e-05	2.9077e-05	1.51508e-05	0	0	1.44724e-05	0	2.91694e-05	5.96374e-05	1.4699e-05	0
Firmicutes	Bacilli	Lactobacillales	Lactobacillaceae	unclassified_Lactobacillaceae	unclassified_Lactobacillaceae	0.000105241	0.000478628	0	0.000166911	0	0	0	0	2.64992e-05	0	0	0	0.000108632	0	0.000110241	0	0	0	0	4.33984e-05	7.25953e-05	0.00016064	0.000133767	3.00784e-05	7.54205e-05	0.000102188	0.000116308	6.06033e-05	0	0.000590014	4.34172e-05	0.00019084	0.000379202	0.000119275	0.000102893	0
Firmicutes	Bacilli	Lactobacillales	Streptococcaceae	Lactococcus	Lactococcus_raffinolactis	0	0.000199428	0	0	0	0	0	0	0	0	0	0	0	0	0	0	0	0	0	0	0	0	0	0	0	0	0	0	0	0	0	0	0	0	0	0
Firmicutes	Bacilli	Lactobacillales	Streptococcaceae	Lactococcus	unclassified_Lactococcus	0.0024337	6.64761e-05	0.000174305	0	0	0	0	0	0	8.23791e-05	0	0	0	0	0	0	0	2.63262e-05	0	0	0	0	0	0	0	0	0	7.57541e-05	0	2.95007e-05	0	0	2.91694e-05	0	2.93979e-05	0
Firmicutes	Bacilli	Lactobacillales	Streptococcaceae	Streptococcus	Streptococcus_dysgalactiae	0	7.97713e-05	0	0	0.000143147	0	0	0	0	0	0	0	2.7158e-05	0	0	0	0.000122201	0	0	0	0	0	0	0	0	8.759e-05	0	0	0	0	0	0	0	0	0	0
Firmicutes	Bacilli	Lactobacillales	Streptococcaceae	Streptococcus	Streptococcus_ferus	0	0	0	0	0	0	0	0	0	0	0	0	0	0	0	0	0	0.000710807	0	0	0	0	0	0	0	0	0	0	0	0	0	0	0	0	0	0
Firmicutes	Bacilli	Lactobacillales	Streptococcaceae	Streptococcus	Streptococcus_hyointestinalis	0.0010261	0.000265904	0	0.000590607	0.000182187	0.00015885	0.000120861	0	0	0.00193591	0.0011139	0	0	0	0.000427186	0	0.000339448	0	0	0.00146108	0.00100181	0	0.000193219	0	0	0	0.000101769	0	0.0117492	0.000560513	0.000926234	0.00215796	0.00202727	0.00187858	0.0014111	0.00269212
Firmicutes	Bacilli	Lactobacillales	Streptococcaceae	Streptococcus	Streptococcus_parasuis	0.000315723	0	0	5.13571e-05	0	0	0	0	0	0	0	0	0	0	0	0	0	0	0	0	0	0	0	0	0	0	0	0	0	0	0	0	0	0	0	0
Firmicutes	Bacilli	Lactobacillales	Streptococcaceae	Streptococcus	Streptococcus_plurextorum	0.00135498	0.00175497	0.000362018	0.00123257	0.00092395	0.00132375	0.000913168	0	0	0.000576654	0	0	0	0	0	0.000425433	0.00293283	0	0	0	0	0	0	0	0	0	0	0	0	0	0	0	0	0	0	0
Firmicutes	Bacilli	Lactobacillales	Streptococcaceae	Streptococcus	Streptococcus_sp._1040_02B	2.63103e-05	0	0	0	0	0	0	0	0	0	0	0	0	0	0	0	0	0	0	0	0	0	0	0	0	0	0	0	0	0	0	0	0	0	0	0
Firmicutes	Bacilli	Lactobacillales	Streptococcaceae	Streptococcus	Streptococcus_sp._C5I1	0	0.00123646	0	0.00291452	0	0.000926625	0	0	0	0	0	0	0	0	0	0	0	0	0	0	0	0	0	0	0	0	0	0	0	0	0	0	0	0	0	0
Firmicutes	Bacilli	Lactobacillales	Streptococcaceae	Streptococcus	Streptococcus_suis	0.00697222	0.00115668	0	0.0077806	0.00197803	0.00221066	0.00232321	0	0	0.00203202	0.000647618	0	0	0.000675515	0.000330724	0.0040622	0.00101834	0	0	0	0	0	0	0	0	0	0	0	0	0	0	0	0	0	0	0
Firmicutes	Bacilli	Lactobacillales	Streptococcaceae	Streptococcus	unclassified_Streptococcus	0.0395048	0.0158745	0.0378644	0.0156254	0.00530946	0.0137802	0.00514329	0.000867569	0.00104672	0.0851113	0.00265523	0.000776003	0.00885352	0.0167289	0.040431	0.015988	0.0346508	0.0016059	0.0897819	0.0762799	0.0840653	0.00407442	0.0501182	0.028033	0.0638811	0.0448169	0.0594914	0.133221	0.019747	0.0416697	0.0796706	0.0758221	0.137373	0.0189945	0.185178	0.00344833
Firmicutes	Bacilli	Lactobacillales	Streptococcaceae	unclassified_Streptococcaceae	unclassified_Streptococcaceae	0	0	0	0	0	0	0	0	0	0	0	0	0	0	0	0	0	0	0	0	0	0	0	0	0	0	0	0	0	0	0	0	0	0	0	0
Firmicutes	Bacilli	Lactobacillales	Vagococcaceae	Vagococcus	unclassified_Vagococcus	0.00106557	0.000146247	0	0.000243946	0	0.000198562	0	0	0	0	0	0	9.50532e-05	0	0	0	2.71558e-05	0	0	0	0	0	0	0	0	0	0	0	0	0	0	0	0	0	0	0
Firmicutes	Bacilli	Lactobacillales	unclassified_Lactobacillales	unclassified_Lactobacillales	unclassified_Lactobacillales	0	0	0	0.000295303	0	0	0	0	0	0	0	0	2.7158e-05	0.000119208	0	0	6.78896e-05	0	0	0	0	0	0	0	0	0	0	0	0	0	0	0	0	0	0	0
Firmicutes	Bacilli	Mycoplasmatales	Mycoplasmataceae	Candidatus_Bacilloplasma	unclassified_Candidatus_Bacilloplasma	0	0	0	0	0	0	0	0	0	0	0	0	0	0	0	0	0	0	0	0	0	0	0	0	0	0	4.36154e-05	0.000227262	0.000105037	0.000103252	7.2362e-05	0.00010276	0.000204186	0.000149094	0.000117592	0
Firmicutes	Bacilli	Mycoplasmatales	Mycoplasmataceae	Candidatus_Bacilloplasma	uncultured_Firmicutes_bacterium	0	0	0	0	0	0	0	0	0	0	0	0	0	0	0	0	0	0	0	0	0	0	0	0	0	0	0	3.03017e-05	0	0	0	0	0	0	0	0
Firmicutes	Bacilli	Mycoplasmatales	Mycoplasmataceae	Mycoplasma	Mycoplasma_sualvi	7.89308e-05	0.107691	0.0721756	0.00136096	0.122456	0.0587215	0.00933312	0.0256934	0.0182579	0	0.00145066	2.82183e-05	0.0229485	0.359374	0.00417539	0.0191445	0.0701978	0.15905	0	7.23306e-05	4.35572e-05	4.3811e-05	0.000297261	3.00784e-05	1.50841e-05	2.91967e-05	2.9077e-05	0	3.00107e-05	0	0	0.0015414	0.000189601	0	0.000117592	0.00010587
Firmicutes	Bacilli	Mycoplasmatales	Mycoplasmataceae	Mycoplasma	unclassified_Mycoplasma	0	0	0	0	0	0	0	0	0	4.11896e-05	0.000284952	5.64366e-05	1.3579e-05	1.32454e-05	0	8.23418e-05	1.35779e-05	2.63262e-05	0	0	0	0	0	0	0	0	0	0	0	0	0	1.468e-05	0	0	0	0
Firmicutes	Bacilli	Paenibacillales	Paenibacillaceae	Paenibacillus	unclassified_Paenibacillus	0	0	0	0	0	0	0	0	0	8.23791e-05	0	0	0	0	0	0	0	0	0	0	0	0	0	0	0	0	0	0	0	0	0	0	0	0	0	0
Firmicutes	Bacilli	RF39	unclassified_RF39	unclassified_RF39	unclassified_RF39	0.000315723	0.000106362	8.04484e-05	0	3.90401e-05	0.0009531	4.02868e-05	0	1.32496e-05	0.00288327	0	0	2.7158e-05	0.000105963	0.00308676	2.74473e-05	0.00169724	0	0.000451678	0.00121515	0.00286025	0.00470238	0.000416165	0.00344397	0.000799457	0.00078831	0.00148292	0.000424223	3.00107e-05	0.00110628	0.00150513	0.0016148	0.00106468	0.00125239	0.00113182	0.00677566
Firmicutes	Bacilli	RF39	uncultured_Erysipelotrichaceae_bacterium	uncultured_Erysipelotrichaceae_bacterium	uncultured_Erysipelotrichaceae_bacterium	5.26205e-05	0	0	0	0	0	0	0	0	0	0	0	0	5.29815e-05	0.000261823	6.86182e-05	0	0	0	0	0	0	0	0	0.000301682	0.000145983	0	4.54525e-05	0	0	0	0	0	0	0	0
Firmicutes	Bacilli	RF39	uncultured_Erysipelotrichia_bacterium	uncultured_Erysipelotrichia_bacterium	uncultured_Erysipelotrichia_bacterium	0	0	0	0	0	0.0001059	0	0	0	0.000192218	0	0	0	1.32454e-05	0.000124022	2.74473e-05	4.07338e-05	0	0	0	0	0	0	0	0	2.91967e-05	0	0	0	0	0	0	0	0	0	3.02485e-05
Firmicutes	Bacilli	RF39	uncultured_Firmicutes_bacterium	uncultured_Firmicutes_bacterium	uncultured_Firmicutes_bacterium	0	0	0	0	0	2.6475e-05	4.02868e-05	0	0	0	0	0	0	0	0.000358285	0	0	0	0	7.23306e-05	0	0	0.000163493	0.00036094	9.05046e-05	0	0	9.0905e-05	0.000180064	0.00346633	0.000549952	0	0.000291694	0.000119275	0.000117592	0.00010587
Firmicutes	Bacilli	RF39	uncultured_Lachnospiraceae_bacterium	uncultured_Lachnospiraceae_bacterium	uncultured_Lachnospiraceae_bacterium	0	5.31809e-05	4.02242e-05	0	0	0	0	0	0	0.000384436	0	0	0	3.97362e-05	0.000344504	2.74473e-05	0.000135779	0	0	0.000347187	0	0	0	0.000120313	0	0.000116787	0.000508847	0	0	0.000132753	5.78896e-05	2.936e-05	0	0.00138657	0.000205786	0.000211739
Firmicutes	Bacilli	RF39	uncultured_prokaryote	uncultured_prokaryote	uncultured_prokaryote	0	0	0	0	0	9.26625e-05	1.34289e-05	0	0	0.000288327	0	0	0	0	0.000220483	0	0.000176513	0	5.8281e-05	0.000737773	0.000406534	0.000642561	0.000208083	0.000586528	0	0.000291967	0.000218077	0	0	0.000191755	0	8.80799e-05	0.000350033	0.000193822	0.000367474	0.000181491
Firmicutes	Bacilli	RF39	uncultured_rumen_bacterium	uncultured_rumen_bacterium	uncultured_rumen_bacterium	0.000157862	2.65904e-05	0.000147489	2.56786e-05	0	0.000251512	0	0	0	0.000631573	0	0	0	3.97362e-05	0.000316944	6.86182e-05	0.000108623	0	7.28513e-05	0.00180827	0.00207623	0.00173784	0.000371576	0.00129337	0.000543027	0.000642326	0.00142477	0.000712089	0.000435154	0.000634265	0.000521007	0.000381679	0.000568803	0.00164003	0.00099953	0.000650343
Firmicutes	Bacilli	RF39	unidentified_rumen_bacterium_RF39	unclassified_unidentified_rumen_bacterium_RF39	unclassified_unidentified_rumen_bacterium_RF39	0	0	5.36322e-05	0	0	0	0	0	0	0.000233407	0	1.41091e-05	0	0	0.000248043	0	6.78896e-05	0	0	0.00026039	0.00110345	0.00170863	0	0.000105274	0	0	0.000378	0.000151508	0	0.000265506	0.000173669	0	0.000729235	0.000805105	0.000161689	0.0010587
Firmicutes	Bacilli	RF39	unidentified_rumen_bacterium_RF9	unclassified_unidentified_rumen_bacterium_RF9	unclassified_unidentified_rumen_bacterium_RF9	0	0	0	0	0	0	0	0	0	0	0	0	0	0	0.000137802	0	2.71558e-05	0	0	2.89323e-05	0.000493648	0.000248262	0.000713426	0.000240627	0	7.29916e-05	0	0	0	0.00147504	7.2362e-05	0	0	0.00023855	0	4.53727e-05
Firmicutes	Bacilli	Staphylococcales	Gemellaceae	Gemella	Gemella_palaticanis	0	0	0	0	0	0	0	0	0	0	0	0	0	0	0	0	0	0	0	0	0	0	0	0	0	0	0	0	0	0	0	0	0	0	0	0
Firmicutes	Bacilli	Staphylococcales	Gemellaceae	Gemella	unclassified_Gemella	0.00443328	0	0.00109946	0.0137123	0.00412524	0.00959718	0.00287379	0	0	0.000672763	0.000971427	0.00049382	0.000339476	0.000609288	0.000151582	0.00264866	0.00191449	2.63262e-05	0	0	0	0	0	0	0	0	0	0	0	0	0	0	0	2.98187e-05	0	0
Firmicutes	Bacilli	Staphylococcales	Staphylococcaceae	Jeotgalicoccus	unclassified_Jeotgalicoccus	0.00118396	0	0.000174305	0	2.60268e-05	0	0	0	0	0.00226543	0	0	0	3.97362e-05	0.000234263	0	0.000203669	0	0	0	0	0	0	0	0	0	0	0	0	0	0	0	0	0	0	0
Firmicutes	Bacilli	Staphylococcales	Staphylococcaceae	Nosocomiicoccus	unclassified_Nosocomiicoccus	0	0	4.02242e-05	0	0	0	0	0	0	0	0	0	0	0	0	0	0	0	0	0	0	0	0	0	0	0	0	0	0	0	0	0	0	0	0	0
Firmicutes	Bacilli	Staphylococcales	Staphylococcaceae	Staphylococcus	unclassified_Staphylococcus	0.000710377	0.00126305	0.00364699	0.00435252	2.60268e-05	0.00047655	0	8.00833e-05	3.97488e-05	0	1.29524e-05	0	2.7158e-05	0	5.51207e-05	0	0.000149357	0	0	0	0	0	7.43152e-05	0	0	0	0	4.54525e-05	0.000105037	0	0	0	0.000175016	0	0	0
Firmicutes	Bacilli	Thermicanales	Thermicanaceae	Thermicanus	unclassified_Thermicanus	0.000223637	0	0	0	0	0	0	0	0	0	0	0	0	0	0	0	0	0	0	0	0	0	0	0	0	0	0	0	0	0	0	0	0	0	0	0
Firmicutes	Bacilli	Thermoactinomycetales	Thermoactinomycetaceae	Thermoactinomyces	unclassified_Thermoactinomyces	0	0	0	0	0	0	0	0	0	0	0	0	0	0	0	0	0	0	0	0	0	0	0	0	0	0	0	0	0	0	0	0	0	0	0	0
Firmicutes	Bacilli	unclassified_Bacilli	unclassified_Bacilli	unclassified_Bacilli	unclassified_Bacilli	0.0192986	0.0061291	0.00518892	0.00811442	0.00113216	0.00447427	0.00139661	0.000200208	0.000450486	0.0516105	0.000803046	0.0266381	0.0025257	0.00736443	0.014855	0.00467976	0.0113376	5.26524e-05	0.0159107	0.0130629	0.00410889	0.00220515	0.00509802	0.00150392	0.0186892	0.0123502	0.0103078	0.0240595	0.000645229	0.0165499	0.00253267	0.0107898	0.0096259	0.00202767	0.00542392	9.07455e-05
Firmicutes	Clostridia	Caldicoprobacterales	Caldicoprobacteraceae	Caldicoprobacter	unclassified_Caldicoprobacter	0	0	0	0	0	0	0	0	0	0	0	0	0	0	0	0	0	0	0	0	0	0	0	0	0	0	0	0	0	0	0	0	0	0	0	0
Firmicutes	Clostridia	Christensenellales	Christensenellaceae	Christensenella	Christensenella_massiliensis	0	0	0	0	0	0	0	0	0	0	0	0	0	0	0	0	0	0	0	0	0	0	0	0	0	0.000102188	0	4.54525e-05	0	0	0	0	0	0	0	0
Firmicutes	Clostridia	Christensenellales	Christensenellaceae	Christensenellaceae_R_7_group	Christensenella_sp._Marseille_P3954	0	0	0	0	0	0	0	0	0	0	0	0	0	3.97362e-05	1.37802e-05	0	0	0	4.37108e-05	0	8.71143e-05	4.3811e-05	0.000104041	4.51175e-05	7.54205e-05	7.29916e-05	0.000232616	7.57541e-05	0	4.42511e-05	0	2.936e-05	0.000189601	7.45468e-05	0.000102893	0
Firmicutes	Clostridia	Christensenellales	Christensenellaceae	Christensenellaceae_R_7_group	Christensenellaceae_R_7_group_bacterium_YE57	0	7.97713e-05	0	0	0	0	0	0	0	2.74597e-05	0	0	0	0	0.000124022	0	0	0	0	0.00162021	0.00111797	0.00146037	0.0006837	0.00129337	0.000120673	0.000102188	0.000508847	3.03017e-05	0.000840298	0.00082602	0.000144724	0	0.00110844	0.000775286	0	0.000650343
Firmicutes	Clostridia	Christensenellales	Christensenellaceae	Christensenellaceae_R_7_group	unclassified_Christensenellaceae_R_7_group	0.00428857	0.000319085	9.38564e-05	0	1.30134e-05	0.000714825	0	0	3.97488e-05	0.00437982	0	0	5.43161e-05	0.000185435	0.00234263	0.000178407	0.00111339	6.58155e-05	0.00524529	0.0098659	0.019412	0.019788	0.0109541	0.0215963	0.00918621	0.00906556	0.0111365	0.0046513	0.00657233	0.0135851	0.00506534	0.00321491	0.00883833	0.0139701	0.00396872	0.0139446
Firmicutes	Clostridia	Christensenellales	Christensenellaceae	Christensenellaceae_R_7_group	uncultured_Clostridia_bacterium	0	0	0	0	0	0	0	0	0	0	0	0	0	0	0	0	0	0	0	0	0.000537205	0	0	0	0	0	0	9.0905e-05	0	0	0	0	0	0	0	0
Firmicutes	Clostridia	Christensenellales	Christensenellaceae	Christensenellaceae_R_7_group	uncultured_Spirochaetales_bacterium	0	0	0	0	0	0	0	0	0	0	0	0	0	0	0	0	0	0	0	0	0	0	0	3.00784e-05	0	0	0	0	0	0	0	0	0	0	0	0
Firmicutes	Clostridia	Christensenellales	Christensenellaceae	Christensenellaceae_R_7_group	uncultured_prokaryote	0.00111819	0.000332381	0.000174305	0	9.10936e-05	0.0002118	4.02868e-05	0	0	0.00090617	2.59047e-05	0	0	0	0.00075791	0.000233302	0.00032587	0	0.000276835	0.00753685	0.00879855	0.0175098	0.00512775	0.0100161	0.00212686	0.00813127	0.0066877	0.00303017	0.0103087	0.011343	0.00885711	0.00275984	0.0108802	0.0138061	0.00261642	0.00803097
Firmicutes	Clostridia	Christensenellales	Christensenellaceae	Christensenellaceae_R_7_group	uncultured_sludge_bacterium	0	0	0	0	0	0	0	0	0	0	0	0	0	0	0	0	0	0	4.37108e-05	8.67968e-05	0.000145191	0	0	0.000120313	0.000135757	0.000102188	0.000218077	0.000121207	0	0	0	0	0	0	0	3.02485e-05
Firmicutes	Clostridia	Christensenellales	Christensenellaceae	Christensenellaceae_R_7_group	uncultured_spirochete	0.000460429	0.000106362	0	2.56786e-05	5.20535e-05	0.0002118	6.71447e-05	0	0	0.000576654	0	1.41091e-05	0	0	0.000385845	0.000137236	0.000230825	0	0.000641091	0.0035442	0.0178875	0.0257901	0.00728289	0.0405306	0.0150388	0.00678822	0.00523385	0.0072724	0.000285101	0.00168154	0.000477589	0.000616559	0.0032378	0.00423426	0.00149929	0.0196161
Firmicutes	Clostridia	Christensenellales	Christensenellaceae	unclassified_Christensenellaceae	unclassified_Christensenellaceae	0	9.30665e-05	5.36322e-05	0	0	0.00140317	6.71447e-05	0	0	0.00120823	0	4.23274e-05	0	0.000556306	0.00216349	0.000494051	0.000271558	0	0.000262265	0.00679908	0.0134301	0.0166336	0.0322825	0.0563067	0.00220228	0.0052408	0.00180277	0.00927231	0.00171061	0.0112545	0.000984124	0.000411039	0.000350033	0.0197847	0.00070555	0.0883256
Firmicutes	Clostridia	Christensenellales	Christensenellaceae	unclassified_Christensenellaceae	uncultured_rumen_bacterium	0	0	0	0	0	0	0	0	0	0	0	0	0	0	0	0	0	0	0	0	0	0	0	0	0	0	0	0	0	0	0	0	0	0	0	0.000136118
Firmicutes	Clostridia	Clostridia_UCG_014	Clostridiales_bacterium_canine_oral_taxon_100	unclassified_Clostridiales_bacterium_canine_oral_taxon_100	unclassified_Clostridiales_bacterium_canine_oral_taxon_100	0.000157862	0	0	0	0	0	0.000913168	0	0	0	0	0	0	0	0	0	0	0	0	0	0	0	0	0	0	0	0	0	0	0	0	0	0	0	0	0
Firmicutes	Clostridia	Clostridia_UCG_014	Clostridiales_bacterium_oral_taxon_075	unclassified_Clostridiales_bacterium_oral_taxon_075	unclassified_Clostridiales_bacterium_oral_taxon_075	0	0	0	0	1.30134e-05	0	0	0	0	0	0	0	0	0	0	2.74473e-05	0	0	0	0	0	0	0	0	0	0	0	0	0	0	0	0	0	0	0	0
Firmicutes	Clostridia	Clostridia_UCG_014	unclassified_Clostridia_UCG_014	unclassified_Clostridia_UCG_014	unclassified_Clostridia_UCG_014	0.00303883	0.000943961	0.000871524	0.000320982	0.000325334	0.00374621	9.40026e-05	0	0	0.0074965	0	0	0.000393792	0.000980158	0.00884687	0.000288196	0.00461649	0	0.00601751	0.00749345	0.0141706	0.014297	0.00593035	0.0294918	0.0124595	0.00817506	0.00597531	0.00839356	0.00532689	0.0115348	0.00959521	0.00916031	0.0101655	0.00536737	0.00589429	0.00447678
Firmicutes	Clostridia	Clostridia_UCG_014	uncultured_Acetivibrio_sp.	uncultured_Acetivibrio_sp.	uncultured_Acetivibrio_sp.	0	0	0	0	0	0	0	0	0	0	0	0	0	0	0	0	0	0	0	0	0	0	0	0	0	0.00043795	0.000261693	0	0	0	0	0	0	0	0	0
Firmicutes	Clostridia	Clostridia_UCG_014	uncultured_Clostridia_bacterium	uncultured_Clostridia_bacterium	uncultured_Clostridia_bacterium	0	0	0	0	0	0	0	0	0	0	0	0	0	0	0	0	0	0	0	0	0	0	0	0	0	0	0	0	0	0	0	0	0	0	0	0
Firmicutes	Clostridia	Clostridia_UCG_014	uncultured_Clostridiales_bacterium	uncultured_Clostridiales_bacterium	uncultured_Clostridiales_bacterium	0	0	0	0	0	0	0	0	0	0.000123569	0	0	0	0	2.75604e-05	0	0	0	0	0	0	0	0	0.000255666	0	0	0.000261693	0	0	0	0	0	0	0	0	0.0010587
Firmicutes	Clostridia	Clostridia_UCG_014	uncultured_Firmicutes_bacterium	uncultured_Firmicutes_bacterium	uncultured_Firmicutes_bacterium	0	0	0	0	0	0	2.68579e-05	0	0	0	0	0	0	0	0	0	0	0	0	0	5.80762e-05	0	0	0	0	0	0	0.000272715	0	0.000132753	0	0	0	0	4.40969e-05	0
Firmicutes	Clostridia	Clostridia_UCG_014	uncultured_Ruminococcaceae_bacterium	uncultured_Ruminococcaceae_bacterium	uncultured_Ruminococcaceae_bacterium	0	0	0	0	0	0	0	0	0	0	0	0	0	0	0	0	0	0	0	0	0	0.000365091	0.000356713	0	0.000603364	0	0.00109039	0.000712089	0	0	0	0.000983558	0.000700066	0	0	0
Firmicutes	Clostridia	Clostridia_UCG_014	uncultured_rumen_bacterium	uncultured_rumen_bacterium	uncultured_rumen_bacterium	0	0	0	0	0	0	0	0	0	0.000768872	0	0	0	0	0	0	0	0	4.37108e-05	0	1.45191e-05	0.000262866	0	0.000526371	0	0	0	0	3.00107e-05	0.000103252	0	0.000337639	8.75082e-05	0	0	0.000196615
Firmicutes	Clostridia	Clostridia_UCG_014	uncultured_rumen_bacterium_5C0d_12	uncultured_rumen_bacterium_5C0d_12	uncultured_rumen_bacterium_5C0d_12	0	0	0	0	0	0.00929272	0	0	0	0.021652	1.29524e-05	0	0	0.00450343	0.0293518	0.00157822	0.0154652	0	0	0	0	0	0	0	0	0	0	0	0	0	0	0	0	0	0	0
Firmicutes	Clostridia	Clostridia_UCG_014	unidentified_rumen_bacterium_JW32	unclassified_unidentified_rumen_bacterium_JW32	unclassified_unidentified_rumen_bacterium_JW32	0	1.32952e-05	0	2.56786e-05	0	0	0	0	0	0.000109839	0	0	0	0	0.000206703	2.74473e-05	9.50454e-05	0	4.37108e-05	0.000622043	0	0	0	0	0	0	4.36154e-05	0	0.000135048	0.000206505	0	0.00019084	0	0	0	0.000453727
Firmicutes	Clostridia	Clostridia_vadinBB60_group	unclassified_Clostridia_vadinBB60_group	unclassified_Clostridia_vadinBB60_group	unclassified_Clostridia_vadinBB60_group	0	0	0	0	0	0	0	0	0	1.37299e-05	0	0	0	0	0	0	0	0	1.45703e-05	0.000607577	0.00288929	0.00148957	0.000267535	0.00448167	4.52523e-05	0.000408753	0.00119216	0.000318167	0.000315112	0.000634265	0.000101307	0.000366999	0.000218771	0.000313096	0.000102893	0.00479439
Firmicutes	Clostridia	Clostridia_vadinBB60_group	uncultured_Clostridiales_bacterium	uncultured_Clostridiales_bacterium	uncultured_Clostridiales_bacterium	0	0	0	0	0	0	0	0	0	2.74597e-05	0	0	0	0	0.000124022	0	0	0	2.91405e-05	5.78645e-05	0.000188748	8.76219e-05	0	3.00784e-05	0	5.83933e-05	0.000174462	1.51508e-05	6.00213e-05	0.000191755	2.89448e-05	0.00010276	0	1.49094e-05	0	0.000151242
Firmicutes	Clostridia	Clostridia_vadinBB60_group	uncultured_Firmicutes_bacterium	uncultured_Firmicutes_bacterium	uncultured_Firmicutes_bacterium	0	0	0	0	0	0	2.68579e-05	0	0	0	0	0	0	0	0	0	0	0	0	0	0	0	0	0	0	0	0	0	0	0	0	0	0	0	0	0
Firmicutes	Clostridia	Clostridia_vadinBB60_group	uncultured_prokaryote	uncultured_prokaryote	uncultured_prokaryote	0	0	0	0	0	0	0	0	0	0	0	0	0	0	0	0	0	0	0	0	0	0	0	0	0	0	0	0	0	0	0	0	0	0	0	0.000166367
Firmicutes	Clostridia	Clostridia_vadinBB60_group	uncultured_rumen_bacterium	uncultured_rumen_bacterium	uncultured_rumen_bacterium	0	0	0	0	0	0	0	0	0	0	0	0	0	0	4.13405e-05	0	0	0	0	0.000115729	0.000290381	0.000233659	0.000118904	0.000105274	3.01682e-05	0.000145983	0.000363462	0.000106056	0.000240085	0.000147504	7.2362e-05	0.000425719	0.000175016	0	0.000102893	0.00010587
Firmicutes	Clostridia	Clostridia_vadinBB60_group	uncultured_rumen_bacterium_4C28d_15	uncultured_rumen_bacterium_4C28d_15	uncultured_rumen_bacterium_4C28d_15	0	0	0	0	0	0	0	0	0	0	0	0	0	0	0	0	0	0	0	5.78645e-05	0	0	0	6.01567e-05	0	0	0	0	0	0.000708017	0	0	0	0	0	0
Firmicutes	Clostridia	Clostridiales	Caloramatoraceae	Fonticella	uncultured_Clostridiales_bacterium	0	0	0	0	0	2.6475e-05	0	0	0	0	0	0	0	0	0	0	0	0	0	0	0	0	0	0	0	0	0	0	0	0	0	0	0	0	0	0
Firmicutes	Clostridia	Clostridiales	Clostridiaceae	Candidatus_Arthromitus	unclassified_Candidatus_Arthromitus	0.00048674	0	0	0	2.60268e-05	0.000516262	0	0	0	2.74597e-05	0	5.64366e-05	0	0	1.37802e-05	0	0	2.63262e-05	0	0	0	0	2.97261e-05	0	0	0	0	0	0	2.95007e-05	0	0	1.45847e-05	0	0	0
Firmicutes	Clostridia	Clostridiales	Clostridiaceae	Clostridium_sensu_stricto_1	Clostridium_butyricum	0.00824826	0.00924018	0.00213188	0.000269625	0.00153558	0.0107621	0.000698305	0.100611	0.0100034	0.0289563	0.00696837	0.167306	0.0299961	0.00607963	0.0172803	0.00774013	0.0075629	0.00600237	0.0163333	0.00070884	0.00143739	0.00185466	0.00269021	0.00141368	0.000784373	0.00166421	0.0198886	0.00559065	0.00129046	0.00172579	0.010478	0.00180564	0.0129366	0.00120766	0.00246943	0.000347858
Firmicutes	Clostridia	Clostridiales	Clostridiaceae	Clostridium_sensu_stricto_1	Clostridium_sp._ND2	0	0	0	0	0	0	0	0	0	0	0.000233143	0	0	0	0	0	0	0	0	0	0	0	0	0	0	0	0	0	0	0	0	0	0	0	0	0
Firmicutes	Clostridia	Clostridiales	Clostridiaceae	Clostridium_sensu_stricto_1	unclassified_Clostridium_sensu_stricto_1	0.0934935	0.161311	0.0918452	0.60134	0.277927	0.120143	0.104867	0.427538	0.349498	0.198479	0.325091	0.459196	0.37732	0.0759358	0.315277	0.204784	0.302462	0.603106	0.045532	0.011949	0.0114846	0.0140049	0.0394019	0.0128886	0.00711969	0.02108	0.0614832	0.0153629	0.0352025	0.0102957	0.0839544	0.0184821	0.0218187	0.0218571	0.0174183	0.0118877
Firmicutes	Clostridia	Clostridiales	Clostridiaceae	Clostridium_sensu_stricto_12	unclassified_Clostridium_sensu_stricto_12	0	0	0	3.85178e-05	0	0	0	0	0	0	0	0	0	0	0	0	0	0	0	0	0	0	0	0	0	0	0	0	0	0	0	0	0	0	0	0
Firmicutes	Clostridia	Clostridiales	Clostridiaceae	Clostridium_sensu_stricto_13	unclassified_Clostridium_sensu_stricto_13	0	0	0	0	0	0	0	0	0	0	0	0	0	0	0.000206703	0	0	0	0	0	8.71143e-05	2.92073e-05	0	0	0	0	0	0	0	0	0	0	0	4.47281e-05	0	0
Firmicutes	Clostridia	Clostridiales	Clostridiaceae	Clostridium_sensu_stricto_6	Clostridium_bornimense	0.00051305	0.00227348	0.00101901	0.000757517	0.00118422	0.00262102	9.40026e-05	0.00475161	0.00526009	0.0030343	0.000984379	0.00747785	0.000624635	0.000397362	0.00260445	0.000137236	0.0011677	0.00100039	0.00109277	0	0.000725953	0.000262866	0.000698563	0.000436136	0.00102572	0.000189778	0.00667316	0.00451495	0.000240085	0	0.00127357	0.00016148	0.000904251	0.000149094	0.000396872	0
Firmicutes	Clostridia	Clostridiales	Clostridiaceae	Proteiniclasticum	unclassified_Proteiniclasticum	3.94654e-05	0	0	0	0	0	0	0	0	8.23791e-05	0	0	0	0	0	0	0	0	0	0	0	0	0	0	0	0	0	0	0	0	0	0	0	0	0	0
Firmicutes	Clostridia	Clostridiales	Clostridiaceae	Sarcina	unclassified_Sarcina	0	0	0	0	0	0	0	0	0	0.000109839	0.0317074	0	0	0.000185435	0	0	0	0	0	0	0	0	0	0	0	0	0	0	0	0	0	0	0	0	0	0
Firmicutes	Clostridia	Clostridiales	Clostridiaceae	unclassified_Clostridiaceae	unclassified_Clostridiaceae	0	0	0	0	0	0	0	0	0	2.74597e-05	0	0	0	0	0	0	0	0	0	0	0	0	0	0	0	0	0	0	0	0	0	0	0	0	0	0
Firmicutes	Clostridia	Clostridiales	unclassified_Clostridiales	unclassified_Clostridiales	unclassified_Clostridiales	0	0	0	0	0	0	0	0	0	0	0	0	0	0	0	0	0	0	2.91405e-05	0	0	0	0	0	0	0	0	0	0	0	0	0	0	0	0	0
Firmicutes	Clostridia	Eubacteriales	Alkalibacteraceae	Alkalibacter	unclassified_Alkalibacter	0	0	0	0	0	0	0	0	0	2.74597e-05	0	0	0	0	0	0	0	0	0	0	0	0	0	0	0	0	0	0	0	0	0	0	0	0	0	0
Firmicutes	Clostridia	Eubacteriales	Alkalibaculum	unclassified_Alkalibaculum	unclassified_Alkalibaculum	0.000131551	0	0	0	0	0	0	0	0	0	0	0	0	0	0	0	0	0	0	0	0	0	0	0	0	0	0	0	0	0	0	0	0	0	0	0
Firmicutes	Clostridia	Eubacteriales	Anaerofustaceae	Anaerofustis	Anaerofustis_sp._Marseille_P2832	0	0	0	0	0	0	0	0	0	5.49194e-05	0	0	0	0	0	0	0	0	0	0	0	0	0	0	0	0	0	0	0	1.47504e-05	0	0	1.45847e-05	0	0	0
Firmicutes	Clostridia	Eubacteriales	Anaerofustaceae	Anaerofustis	unclassified_Anaerofustis	0	0	1.34081e-05	0	0	2.6475e-05	0	0	0	0.000274597	0	0	0	2.64908e-05	0.000137802	0	0.000135779	0	0	0	1.45191e-05	2.92073e-05	0	0	0	4.3795e-05	0	1.51508e-05	0	0	0	0	0	0	0	0
Firmicutes	Clostridia	Eubacteriales	Eubacteriaceae	Acetobacterium	unclassified_Acetobacterium	0	0	0	6.41964e-05	0	0	0	0	0	0	0	0	0	0	0	0	0	0	0	0	0	0	0	0	0	0	0	0	0	0	0	0	0	0	0	0
Firmicutes	Clostridia	Eubacteriales	Eubacteriaceae	Pseudoramibacter	unclassified_Pseudoramibacter	0	0	0	0	0	0	0	0	0	0.000137299	0	0	0	0.000185435	4.13405e-05	4.11709e-05	0	0	0	0	0	0	0	0	0	0	0	0	0	0	0	0	0	0	0	0
Firmicutes	Clostridia	Gracilibacteraceae	Lutispora	unclassified_Lutispora	unclassified_Lutispora	0	0	0	0	0	0	0	0	0	2.74597e-05	0	0	0	0	0	0	0	0	0	0	0	0	0	0	0	0	0	0	0	0	0	0	0	0	0	0
Firmicutes	Clostridia	Lachnospirales	Defluviitaleaceae	Defluviitaleaceae_UCG_011	unclassified_Defluviitaleaceae_UCG_011	0	0	0	0	0	0	0	0	0	0	0	0	0	0	0	0	0	0	0.000320546	4.33984e-05	0.00015971	2.92073e-05	0.000208083	4.51175e-05	0.000135757	0.00043795	0.000799616	0	0.000240085	0	4.34172e-05	0.00023488	0.000145847	4.47281e-05	0.000411571	3.02485e-05
Firmicutes	Clostridia	Lachnospirales	Lachnospiraceae	ASF356	unclassified_ASF356	0	0	0	0	0	0	0	0	0	0	0	0	0	0	0	0	0	0	0	0	0	0	0	0	0	0	0	0	0	0	0	0	0	0	0	0
Firmicutes	Clostridia	Lachnospirales	Lachnospiraceae	Acetitomaculum	Firmicutes_bacterium_CAG_194_44_15	0	0	0	0	0	0	0	0	0	0	0	0	0	0	0	0	0	0	0	0	0	0.000248262	0	0.000210548	0	8.759e-05	0.000218077	0	0.000885314	0.000457261	0.000463117	0.00010276	0.000291694	0.000119275	0.000176388	0.000196615
Firmicutes	Clostridia	Lachnospirales	Lachnospiraceae	Acetitomaculum	Lachnospiraceae_bacterium_canine_oral_taxon_099	0	0	0	0	0	0	0	0	0	0	0	0	0	0	0	0	0	0	0	0	0	0	0	0	0	0	0	0	0	0	0	0	0	0	0	0
Firmicutes	Clostridia	Lachnospirales	Lachnospiraceae	Acetitomaculum	unclassified_Acetitomaculum	1.31551e-05	0	0	0	0	0	0	0	0	0.000700222	0	0	0	9.27177e-05	0.000289384	0	4.07338e-05	0	7.28513e-05	0.0054682	0.000174229	0.00016064	0	0.000135353	0	0.00026277	1.45385e-05	9.0905e-05	0.000150053	0.000737518	7.2362e-05	0.000851439	0.000204186	0.000342915	0	7.56212e-05
Firmicutes	Clostridia	Lachnospirales	Lachnospiraceae	Agathobacter	unclassified_Agathobacter	0	0	0	0	0.00011712	0	0	0	0	0	0	0	0	0	0	4.11709e-05	0	0	0.00847989	0	0	0	0.00199165	0	0.003228	0	0.0118489	0.00172719	0.00504179	0.000516262	0.00078151	0.00935115	0	0	0.00621766	0
Firmicutes	Clostridia	Lachnospirales	Lachnospiraceae	Anaerosporobacter	Anaerosporobacter_mobilis	0	0	0	0	0	0	0	0	0	0	0	0	4.07371e-05	0	0	0	0	0	0	0	0	0	0	0	0	0	0	0	0	0	0	0	0	0	0	0
Firmicutes	Clostridia	Lachnospirales	Lachnospiraceae	Anaerosporobacter	unclassified_Anaerosporobacter	0	0	0	0	0	0.000172087	0	0	0	0	0	0	0	0	0.000372065	0	0.000108623	0	0	0.000679908	0.000813067	0.00194229	0	0.00054141	0	0	0	0	0	0	0	0	0.000204186	0.000313096	0	0.000695715
Firmicutes	Clostridia	Lachnospirales	Lachnospiraceae	Anaerosporobacter	uncultured_Lachnospiraceae_bacterium	0	0	0	0	0	0	0	0	0	0.000411896	0	0	0	0	0	0	0	0	0	0	0	0	0	0	0	0	0	0	0	0	0	0	0	0	0	0.00102845
Firmicutes	Clostridia	Lachnospirales	Lachnospiraceae	Anaerostipes	unclassified_Anaerostipes	0.000434119	0	0	0	0	0	0	0	0	0	0	0	0	0	0.000206703	0	0	0	0	0.000882434	0	0	0	0	0	0.000160582	0	0.000348469	0	0	0	0.00023488	4.37541e-05	0	0	0
Firmicutes	Clostridia	Lachnospirales	Lachnospiraceae	Blautia	unclassified_Blautia	0.00138129	7.97713e-05	0.000160897	0.000166911	0	0	0	0	0	0.00178488	0	0	9.50532e-05	0.000317889	0.000578768	0	0.000271558	0	0.0128947	0.00114282	0.000566243	0.00105146	0.00600467	0.000691802	0.00579229	0.001708	0.00713839	0.00368165	0.00304608	0.00085552	0.00172222	0.00441867	0.00102093	0.000581465	0.00532103	0.000423479
Firmicutes	Clostridia	Lachnospirales	Lachnospiraceae	Butyrivibrio	Butyrivibrio_crossotus	0	0	0	0	0	0	0	0	0	0	0	0	0	0	0	0	0	0	0	0.000390585	0	0	0	0	0.000437439	0.00017518	0	7.57541e-05	0	0	0.000217086	0	0	0	0.00014699	0
Firmicutes	Clostridia	Lachnospirales	Lachnospiraceae	Cellulosilyticum	unclassified_Cellulosilyticum	0	9.30665e-05	0	0	0.000130134	9.26625e-05	0.000537158	0	0	0.00233407	0.000233143	0.00688526	0	0.000119208	0.0061184	9.60654e-05	9.50454e-05	0	0	4.33984e-05	4.35572e-05	0.000146037	0	0	0	0	0.000465231	0	0.000105037	0	0	4.40399e-05	4.37541e-05	0	4.40969e-05	3.02485e-05
Firmicutes	Clostridia	Lachnospirales	Lachnospiraceae	Cellulosilyticum	uncultured_Cellulosilyticum_sp.	0	0	0	0	0.000130134	0	0	0	0	0	0	0.00172132	0	0	0	0	0	0	0	0	0	0	0	0	0	0	0.000305308	0	0	0	0	0	0	0	0	0
Firmicutes	Clostridia	Lachnospirales	Lachnospiraceae	Cellulosilyticum	uncultured_Clostridia_bacterium	0	0	0	0	0	0	0	0	0	0	0	0	0	2.64908e-05	0	0	0	0	0	0	0	0	0	0	0	0	0	0	0	0	0	0	0	0.000119275	0	0
Firmicutes	Clostridia	Lachnospirales	Lachnospiraceae	Coprococcus	Coprococcus_eutactus	0.00053936	0	0	0	0	0	0	0	0	0	0	0	0	0	0	0	0	0	0.000976207	0.000303789	0.000188748	0.00100765	0	0.000375979	0	0	0	0	0	0	0	0	0	0.00022364	0	0
Firmicutes	Clostridia	Lachnospirales	Lachnospiraceae	Coprococcus	unclassified_Coprococcus	0.000328878	0.000664761	0.00041565	0	0	0.000185325	0	0	0	0.00109839	0	0	0	0.000185435	0.000950832	0.000384262	0.000366604	0	0.00205441	0.00458576	0.0021343	0.0028039	0.00208083	0.00366956	0.000905046	0.00487584	0.00257331	0.00368165	0.00376634	0.00289107	0.00195378	0.00334703	0.00172099	0.00116293	0.00133761	0.0029946
Firmicutes	Clostridia	Lachnospirales	Lachnospiraceae	Coprococcus	uncultured_prokaryote	0	0	0	0	0	0	0	0	0	0	0	0	0	0	0	0	0	0	0.000174843	0.00121515	0.000900181	0.00265787	0.000594521	0.000586528	9.05046e-05	0.0043357	0	0	0.00090032	0.00312707	0	0.00137992	0	0.000328006	0.000514464	0.000287361
Firmicutes	Clostridia	Lachnospirales	Lachnospiraceae	Dorea	Dorea_formicigenerans	0.000157862	0	0	3.85178e-05	0	0	0	0	0	0.000508005	0	0	0	0	0	0	0	0	0.00055367	0	0	0	7.43152e-05	0	0.000784373	0.000992686	0.000450693	0.000287866	0	0	0	0.00160012	0	0	0.000176388	0
Firmicutes	Clostridia	Lachnospirales	Lachnospiraceae	Dorea	unclassified_Dorea	0.000236792	0	0	0	0	9.26625e-05	0	0	0	0.000576654	0	0	0.000108632	0	0	5.48945e-05	0	0	0.00174843	0.00108496	0.00268603	0.00661546	0.00263076	0.00224084	0.00120673	0.00100728	0.0081997	0.00212112	0.0167459	0.00162254	0.00117227	0.00745743	0.00441916	0.00205749	0.00508584	0.000257112
Firmicutes	Clostridia	Lachnospirales	Lachnospiraceae	Epulopiscium	unclassified_Epulopiscium	0	0	0	0	0	7.9425e-05	0.000147718	0	0	0.000151028	0	0	0	0	0.00148826	0.000356814	0	0	0	0	0	0	0	0	0	0	0	0	0	0	0	0	0	0	0	0
Firmicutes	Clostridia	Lachnospirales	Lachnospiraceae	Frisingicoccus	unclassified_Frisingicoccus	0	0	6.70403e-05	0	0	0	0	0	0	0	0	0	0	6.62269e-05	0	0	0	0	0	0.00044845	0.000130672	0.000335884	1.4863e-05	0.00102266	0	0	4.36154e-05	0	0.000360128	0.00143078	0	0	0.000437541	0.000149094	0	0.000136118
Firmicutes	Clostridia	Lachnospirales	Lachnospiraceae	Fusicatenibacter	unclassified_Fusicatenibacter	0	0	0	0	0	0	0	0	0	0	0	0	0	0	0	0	0	0	0.000349686	0	0	0	0	0	3.01682e-05	8.759e-05	0.000130846	0	0	0	8.68345e-05	0.0002936	0	0	5.87959e-05	0
Firmicutes	Clostridia	Lachnospirales	Lachnospiraceae	GCA_900066575	unclassified_GCA_900066575	0	0	0	0	0	0	0	0	0	0	0	0	0	0	0	0	0	0	0.000174843	0.000231458	0.000203267	0	0.000193219	7.51959e-05	0	0.000423351	0.000261693	0	0.00045016	0	0.000101307	0.000528479	0.000306279	0.000313096	0.000132291	0.000317609
Firmicutes	Clostridia	Lachnospirales	Lachnospiraceae	Howardella	Howardella_ureilytica	0	0	0	0	0	0	0	0	0	0	0	0	0	0	0	0	0	0	0	0	0	0	0	0	0	0	0	0	0	0	0	0	0	0	0	0
Firmicutes	Clostridia	Lachnospirales	Lachnospiraceae	Howardella	unclassified_Howardella	0	6.64761e-05	0	0	0	0	0.000214863	0	0	0	0	0	0	0	4.13405e-05	0	0	0	0	0	0	0	0	0	0	0	0	0	0	0	5.78896e-05	0	0	0	0	0
Firmicutes	Clostridia	Lachnospirales	Lachnospiraceae	Johnsonella	unclassified_Johnsonella	0	3.98857e-05	0.000804484	0.000693321	0.000273281	0.000198562	0	0	0	0	0	0	0	0.000291398	0	0	0	0	0	0	0	0	0	0	0	0	0	0	0	0	0	0	0	0	0	0
Firmicutes	Clostridia	Lachnospirales	Lachnospiraceae	Lachnoanaerobaculum	unclassified_Lachnoanaerobaculum	0	0	0	0	0	0	0	0	0	0	0	0	0	0	0	4.11709e-05	0	0	0	0	0	0	0	0	0	0	0	0	0	0	0	0	0	0	0	0
Firmicutes	Clostridia	Lachnospirales	Lachnospiraceae	Lachnoclostridium	unclassified_Lachnoclostridium	0.000328878	0	0.000107264	7.70357e-05	0	0	0	0	0	0.000686493	0	0	0	0	0.000496086	0	0	0	0.00183585	0.000622043	0	0.00148957	0	0	0.000407271	0	0	0	0.000975346	0.000619515	0	0.00733999	0	0	0	0
Firmicutes	Clostridia	Lachnospirales	Lachnospiraceae	Lachnospira	unclassified_Lachnospira	0.0010261	9.30665e-05	0.000134081	0	5.20535e-05	0	0	0	0	6.86493e-05	0	0	5.43161e-05	7.94723e-05	0.000248043	0	0	0	0.00319088	0.00128749	0.00166969	0.000292073	0.0107162	0.000421097	0.00111622	0.00909476	0.00299493	0.00692393	0.0142701	0.00241906	0.00940707	0.0125954	0.00268358	0.0015953	0.00354245	0.00207202
Firmicutes	Clostridia	Lachnospirales	Lachnospiraceae	Lachnospiraceae_AC2044_group	unclassified_Lachnospiraceae_AC2044_group	0	0	0	0	0	0.000622162	0	0	0	0.0125765	0	0	0	0	0.00177764	0.000109789	0.00164293	0	0	0.00195293	0.014824	0.0188533	0	0.0199119	0	0.0017226	0.000159923	0	0.00840298	0.0113578	0.0595974	0.000455079	0.00888208	0.0295652	0	0.0312013
Firmicutes	Clostridia	Lachnospirales	Lachnospiraceae	Lachnospiraceae_FCS020_group	unclassified_Lachnospiraceae_FCS020_group	0	0	0	0	0	0	0	0	0	0	0	0	0	0	0	0	0	0	0.00158816	0.000376119	0	0	0.000698563	0	0.000271514	0.000233573	0.00194816	0.000530279	0.000210075	0.000162254	0.000651258	0.000968878	0	0.000372734	0	0.000257112
Firmicutes	Clostridia	Lachnospirales	Lachnospiraceae	Lachnospiraceae_FCS020_group	uncultured_prokaryote	0	0	0	0	0	0	0	0	0	0	0	0	0	0	0	4.11709e-05	0	0	0	0.000853502	0.000595281	0	0.000208083	0.000345901	0.000377102	0.000321163	0	0.00018181	0.000540192	0.000457261	0.000810455	0.000425719	0.000685481	0.000417462	0.000352775	0.000272236
Firmicutes	Clostridia	Lachnospirales	Lachnospiraceae	Lachnospiraceae_NC2004_group	unclassified_Lachnospiraceae_NC2004_group	0	0	0	0	0	0	0	0	0	0	0	0	0	0	0	0	0	0	0	0	2.90381e-05	0	0	0	0	0	0	0	0	0	0	0	0	0	0	0
Firmicutes	Clostridia	Lachnospirales	Lachnospiraceae	Lachnospiraceae_NC2004_group	uncultured_Clostridiaceae_bacterium	0.000881393	0	0	0	0	0	0	0	0	0	0	0	0	0	0	0	0	0	0.000101992	0	5.80762e-05	0	0.000118904	0	0	0	0	4.54525e-05	0	0	2.89448e-05	0.00137992	0	0	0.000191087	0
Firmicutes	Clostridia	Lachnospirales	Lachnospiraceae	Lachnospiraceae_ND3007_group	unclassified_Lachnospiraceae_ND3007_group	0	0	0	0	0	0	0	0	0	0	0	0	0	0	0	0	0	0	0.000655661	0.000853502	0.000232305	0	0.00221459	0	0.000362018	0.00103648	0.00218077	0.00106056	0.000840298	0.000206505	0.00108543	0	0.000379202	0.00196803	0.000514464	0
Firmicutes	Clostridia	Lachnospirales	Lachnospiraceae	Lachnospiraceae_NK3A20_group	Lachnospiraceae_bacterium_DJF_VP52	0	0	0	0	0	0	0	0	0	0	0	0	0	0	6.89009e-05	0	0	0	0	0	0	0	0	0	0	0	0	0	0	0	0	0	0	0	0	0
Firmicutes	Clostridia	Lachnospirales	Lachnospiraceae	Lachnospiraceae_NK3A20_group	unclassified_Lachnospiraceae_NK3A20_group	0.00123658	0	0	0.000166911	0	0.000172087	0	0	0	0.0013318	0	0	0.000203685	0.00017219	0.000440966	0.000164684	0.00065174	0	0.00115105	0	0	0	0.000594521	0	0.000950298	0.00105108	0.000537924	0.00054543	0	0	0.000824927	0.000792719	0	2.98187e-05	0.000338076	0
Firmicutes	Clostridia	Lachnospirales	Lachnospiraceae	Lachnospiraceae_NK3A20_group	uncultured_Lachnospiraceae_bacterium	0	0	0	0	0	0	0	0	0	0	0	0	6.78951e-05	0	4.13405e-05	0	0	0	0	0	0	0	0	0	0	0	0	0	0	0	0	0	0	0	0	0
Firmicutes	Clostridia	Lachnospirales	Lachnospiraceae	Lachnospiraceae_NK4A136_group	Lachnospiraceae_bacterium_GAM79	0	0	0	0	0	0	0	0	0	0	0	0	0	0	0	0	0	0	0.000407967	0	0	0	0.00511288	0	0.000377102	0.0026277	0.00145385	0.00231808	0.00289603	0	0.000593369	0.00488843	0.00102093	0.00070074	0.0013964	0
Firmicutes	Clostridia	Lachnospirales	Lachnospiraceae	Lachnospiraceae_NK4A136_group	Trichinella_pseudospiralis	0	0	0	0	0	0	0	0	0	0	0	0	0	0	0	0	0	0	0	0	0	0	0	0	0	0	0	0	0	0	0	0	0	0	0	0
Firmicutes	Clostridia	Lachnospirales	Lachnospiraceae	Lachnospiraceae_NK4A136_group	unclassified_Lachnospiraceae_NK4A136_group	3.94654e-05	0	0	0	0	0	0	0	0	0.00188099	0	0	0	0	0.000564987	0	0.000353026	3.94893e-05	0	0	0.0201089	0.00489223	0.00231863	0.00290256	0	0.00188318	0.00159923	0	0	0	0	0.000631239	0	0.00386152	0	0.00629169
Firmicutes	Clostridia	Lachnospirales	Lachnospiraceae	Lachnospiraceae_NK4B4_group	unclassified_Lachnospiraceae_NK4B4_group	0	0	0	0	0	0	0	0	0	0	0	0	0	0	0	0	0	0	0	0.000216992	0.00214882	0.000335884	0.00181329	0.00102266	0	0.000189778	0	0	0	0	0.000130252	0	0.000612557	0.000387643	0.000264581	0.00089233
Firmicutes	Clostridia	Lachnospirales	Lachnospiraceae	Lachnospiraceae_UCG_003	unclassified_Lachnospiraceae_UCG_003	0	0	0	0	0	0	0	0	0	0	0	0	0	0	0	0	0	0	0	0	0.000130672	0.000496524	0.000772878	0.000225588	0.000301682	0.000452548	0.001134	0.000454525	0.000105037	0.000619515	0.000144724	0.000352319	0.000627142	0	0.00119062	0
Firmicutes	Clostridia	Lachnospirales	Lachnospiraceae	Lachnospiraceae_UCG_004	unclassified_Lachnospiraceae_UCG_004	0	0	0	0	0	0	0	0	0	0	0	0	0	0	0	0	0	0	0.00104906	0	2.90381e-05	2.92073e-05	0	0	0.00058828	2.91967e-05	2.9077e-05	0	7.50266e-05	0	0	0.00016148	0	2.98187e-05	0.000529163	0
Firmicutes	Clostridia	Lachnospirales	Lachnospiraceae	Lachnospiraceae_UCG_004	uncultured_Lachnospiraceae_bacterium	0	0	0	0	0	0	0	0	0	0	0	0	0	0	0	0	0	0	0	0	0	0	0	0	0	0	0	0	0	0	0	0	0	0	0	0
Firmicutes	Clostridia	Lachnospirales	Lachnospiraceae	Lachnospiraceae_UCG_007	unclassified_Lachnospiraceae_UCG_007	0	0	0	0	0	0	0	6.67361e-05	0	0.0018398	0	0	0.000325897	6.62269e-05	0.000826811	0	0.000122201	0	0	0	0	0	0	0	0	0	0	0	0	0	0	0	0	0	0	0
Firmicutes	Clostridia	Lachnospirales	Lachnospiraceae	Lachnospiraceae_UCG_010	unclassified_Lachnospiraceae_UCG_010	0	0	0	3.85178e-05	0	0	0	0	0	2.74597e-05	0	0	0	0	0	0	0	0	0.000364256	0	0	8.76219e-05	0.000193219	0	3.01682e-05	5.83933e-05	0.000305308	3.03017e-05	0.000735261	0.000177004	0.000115779	0.000469759	0	0.000298187	0.000382173	0.000408355
Firmicutes	Clostridia	Lachnospirales	Lachnospiraceae	Lachnospiraceae_XPB1014_group	unclassified_Lachnospiraceae_XPB1014_group	0.000644601	0.000930665	0.000388834	0	0.00011712	0.002118	0	0	0	0.0180273	0	0	6.78951e-05	0.000185435	0.00165362	0.000178407	0.00165651	5.26524e-05	0	0.0545373	0.0581488	0.0252059	0.0232012	0.0458394	0	0.00119706	0.000974078	0	0.0348874	0.0451066	0.0256017	0	0.0232772	0.0236164	0.000837841	0.0225805
Firmicutes	Clostridia	Lachnospirales	Lachnospiraceae	Marvinbryantia	unclassified_Marvinbryantia	0	0	0	0	0	0	0	0	0	0.000851251	0	0	0	0	0.000427186	6.86182e-05	0.00032587	0	0.00134046	0.000723306	0	0.00059875	0.000401302	0.000300784	0.000120673	0.000481745	0.00125031	0.000272715	0.000120043	0.000398259	0.000274976	0.000778039	0.000729235	0.000790196	0.000499765	0
Firmicutes	Clostridia	Lachnospirales	Lachnospiraceae	Oribacterium	unclassified_Oribacterium	0.00186803	0	0.000134081	0	0	9.26625e-05	0	0	0	0.000343246	0	0	0	0	2.75604e-05	0	4.07338e-05	0	0.0194659	0.00234351	0.00139383	0.000379695	0.00447377	0.000706841	0.0101516	0.00938672	0.00628062	0.00618154	0.00414147	0.00125378	0.0030971	0.00364063	0.000948006	0.000864742	0.00776105	0.000362982
Firmicutes	Clostridia	Lachnospirales	Lachnospiraceae	Oribacterium	uncultured_rumen_bacterium_4C28d_17	0	0	0	0	0	0	0	0	0	0	0	0	0	0	0	0	0	0	0	0	0	0	7.43152e-05	0	0	0	0	0.00036362	0	0	0	0	0	0	0	0
Firmicutes	Clostridia	Lachnospirales	Lachnospiraceae	Roseburia	Roseburia_intestinalis	0	0	0	0	0	0	0	0	0	0	0	0	0	0	0	0	0	0	0	0.000766705	0.00113249	0.00673229	0	0.00927917	0	0	0	0	0.00147052	0.00314182	0	0	0	0.000820014	0	0.00459777
Firmicutes	Clostridia	Lachnospirales	Lachnospiraceae	Roseburia	unclassified_Roseburia	0.000776152	0	0	0	0	0.000251512	0	0	0	0	0	0	0	0	0	0	0	0	0.00231667	0.00326934	0.00621416	0.016692	0.0357605	0.00485765	0.00603364	0.00712398	0.0118925	0.00399982	0.0243536	0.00988273	0.0105214	0.00839695	0.00500255	0.0182789	0.010451	0.00245013
Firmicutes	Clostridia	Lachnospirales	Lachnospiraceae	Roseburia	uncultured_Roseburia_sp.	0	0	0	0	0	0	0	0	0	0	0	0	0	0	0	0	0	0	0	0	0	0	0	0	0.000467607	0	0	0	0	0	0	0	0	0	0	0
Firmicutes	Clostridia	Lachnospirales	Lachnospiraceae	Shuttleworthia	uncultured_Lachnospiraceae_bacterium	0.00132867	0	0	0	0	0	0	0	0	0.000109839	0	0	0	0	0	0	0	0	0.00692087	0	0	0	0.00188761	0	0.00092013	0.00164961	0.000945001	0.00384831	0.000150053	0	0.000303921	0.00182032	0	0	0.000587959	0
Firmicutes	Clostridia	Lachnospirales	Lachnospiraceae	Syntrophococcus	unclassified_Syntrophococcus	0	0	0	0	0	0	0	0	0	0	0	0	0	0.000119208	0	0	0.000217247	0	0	0	0	0	0	0	0.000346934	0	0	0	0	0	0	0	0	0	0	0
Firmicutes	Clostridia	Lachnospirales	Lachnospiraceae	Tuzzerella	unclassified_Tuzzerella	0	0	0	0	0	0	0	0	0	0	0	0	0	0	0	0	0	0	0	0.000115729	0.000217786	0	0	9.02351e-05	0.000105589	0	0.000101769	0	0	4.42511e-05	0	0	0	0	0	0
Firmicutes	Clostridia	Lachnospirales	Lachnospiraceae	Tyzzerella	unclassified_Tyzzerella	0	0.000106362	0	0	0	0	0	0	0	0	0	0	0	2.64908e-05	0	0	2.71558e-05	0	0	0	0	2.92073e-05	0.000133767	0	0	0	4.36154e-05	0	0	0	0	0	0	0	0	0
Firmicutes	Clostridia	Lachnospirales	Lachnospiraceae	Tyzzerella	uncultured_rumen_bacterium	0	0	6.70403e-05	0	0	0	0	0	0	0	0	0	0	0	4.13405e-05	0	0	0	0	0	0	8.76219e-05	5.94521e-05	0	1.50841e-05	0	0	0	0	1.47504e-05	0	0.000513799	0	0	0	0
Firmicutes	Clostridia	Lachnospirales	Lachnospiraceae	XBB1006	unclassified_XBB1006	0	0.000345676	0	0	0	0	0	0	0	6.86493e-05	0	0	0	0	0	0	0	0	0	0.000925832	0.00143739	0.000744786	0.00102555	0.00118809	0.00179501	0.00109487	0	0.00090905	0.000165059	0.000206505	0	0	0.000233355	0.000402552	0	0.000317609
Firmicutes	Clostridia	Lachnospirales	Lachnospiraceae	[Acetivibrio]_ethanolgignens_group	Acetivibrio_ethanolgignens	0	0	0	0	0	0	0	0	0	0	0	0	0	0	0	0	0	0	0	0	0	0	0	0	0.000150841	0	0	0	0	0	0	0	0	0	0	0
Firmicutes	Clostridia	Lachnospirales	Lachnospiraceae	[Bacteroides]_pectinophilus_group	unclassified_[Bacteroides]_pectinophilus_group	0.00159177	0.000132952	0	0	0	0	0	0	0	0	0	0	0	0	0	0	0	0	0.00152988	0.000289323	0	0	0	0	0	0.000452548	0	7.57541e-05	9.0032e-05	0.000634265	0.000274976	0.00118908	0.00189601	0	0	0
Firmicutes	Clostridia	Lachnospirales	Lachnospiraceae	[Eubacterium]_eligens_group	unclassified_[Eubacterium]_eligens_group	0.00132867	0	0	0.000128393	0	0	0	0	2.64992e-05	0.000247137	0	0	0	0	0	0	0	0	0.00607579	0.00063651	0.000377495	0.000146037	0.00172411	0	0.00669734	0.00236493	0.00197723	0.0132115	0.00159056	0.00154879	0.00172222	0.00174692	0.00164807	0.000342915	0.00261642	0
Firmicutes	Clostridia	Lachnospirales	Lachnospiraceae	[Eubacterium]_fissicatena_group	unclassified_[Eubacterium]_fissicatena_group	0	0	0	0	0	0	0	0	0	0	0	0	0	0	0	0	0	0	0	0	0.000203267	0.000175244	0	0.000315823	0	0	0	0	0	0.00165204	0.000144724	0	0	0	0	0.000574721
Firmicutes	Clostridia	Lachnospirales	Lachnospiraceae	[Eubacterium]_hallii_group	unclassified_[Eubacterium]_hallii_group	0.000723532	9.30665e-05	0.000187713	0	0	0	0	0	0	0.00200456	0	0	0	0.000105963	0.00114375	0.000178407	0.000760363	0	0.000320546	0.00360207	0.000508167	0.00075939	0.000713426	0.00112794	0.000452523	0.000510941	0.00159923	0.00054543	0.00150053	0.000781769	0.000795982	0.00157076	0.00119595	0.00359315	0.0014846	0.000680591
Firmicutes	Clostridia	Lachnospirales	Lachnospiraceae	[Eubacterium]_hallii_group	uncultured_Clostridiales_bacterium	0	0	0	0	0	0	0	0	0	2.74597e-05	0	0	0	0	0	0	0	0	0	0	0	0	0	0	0	0	0	0	0	0	0	0	0	0	0	0
Firmicutes	Clostridia	Lachnospirales	Lachnospiraceae	[Eubacterium]_oxidoreducens_group	unclassified_[Eubacterium]_oxidoreducens_group	0	0	0	0	0	0	0	0	0	0	0	0	0	0	0	0	0	0	0	0	0.000101633	0.000189848	2.97261e-05	6.01567e-05	0.000105589	0.000160582	2.9077e-05	0.000121207	9.0032e-05	0.000162254	0.000260503	2.936e-05	7.29235e-05	0.000328006	8.81938e-05	0.000226864
Firmicutes	Clostridia	Lachnospirales	Lachnospiraceae	[Eubacterium]_ruminantium_group	unclassified_[Eubacterium]_ruminantium_group	0.00315723	0	0	0	0	7.9425e-05	0	0	0	0.000796331	0	0	0	0.00017219	0.000620108	4.11709e-05	0.00065174	0	0.00556584	0.0010271	0	0.00328582	0.0113256	0.00285744	0.0106192	0.00344521	0.00551008	0.00492402	0.0050568	0.0019323	0.00369046	0.00565179	0.00211478	0.00307133	0.00351305	0.00142168
Firmicutes	Clostridia	Lachnospirales	Lachnospiraceae	[Eubacterium]_ventriosum_group	unclassified_[Eubacterium]_ventriosum_group	0	0	0	0	0	0	0	0	0	0	0	0	0	0	0	0	0	0	0	0	0	0.000584146	0.000178356	0	0	0	0.000348923	0	0	0	4.34172e-05	0	0	0	0	0
Firmicutes	Clostridia	Lachnospirales	Lachnospiraceae	[Eubacterium]_ventriosum_group	uncultured_Eubacterium_sp.	0	0	0	0	0	0	0	0	0	0	0	0	0	0	0	0	0	0	0.000451678	0	0	0	0	0	0.000346934	0	0	0	0	0	0	0	0	0	0	0
Firmicutes	Clostridia	Lachnospirales	Lachnospiraceae	[Eubacterium]_ventriosum_group	uncultured_rumen_bacterium	0	0	0	0	0	0	0	0	0	0	0	0	0	0	0	0	0	0	0	0	0	8.76219e-05	0	0.00018047	0	0	0	0	0.000120043	0	0	0	0	0	0	0
Firmicutes	Clostridia	Lachnospirales	Lachnospiraceae	[Eubacterium]_xylanophilum_group	unclassified_[Eubacterium]_xylanophilum_group	0.000315723	0	0	0	0	0	0	4.00416e-05	0	0	0	0	0	0	0	0	0	0	0	0.000347187	0.000290381	2.92073e-05	0.000772878	0.000240627	0.000150841	0	0	0.000303017	0.000735261	0.000442511	0.000738093	0	0.000320863	0.00023855	0	0
Firmicutes	Clostridia	Lachnospirales	Lachnospiraceae	[Ruminococcus]_gauvreauii_group	unclassified_[Ruminococcus]_gauvreauii_group	0	0	0	0	0	0	0	0	0	0.000356976	0	0	0	0	0.000124022	0	0	0	0	0	0	0	0	0	0	5.83933e-05	0	0	0	0	0	7.33999e-05	0	0	0.000205786	0
Firmicutes	Clostridia	Lachnospirales	Lachnospiraceae	[Ruminococcus]_gauvreauii_group	uncultured_rumen_bacterium	0	0	0	0	0	0	0	0	0	0	0	0	0	0	4.13405e-05	0	0.000135779	0	0	0	0	0	0	0	0.00025643	0	0	0	0	0	0	0	0	0	0	0
Firmicutes	Clostridia	Lachnospirales	Lachnospiraceae	[Ruminococcus]_torques_group	unclassified_[Ruminococcus]_torques_group	0.000960324	0	0	0	0	0	0	0	0	0	0	0	0	0	0	0	0	0	0.00282663	0	0	0	0.000104041	0	0.000135757	0.000335762	0.002646	0.00018181	0.000690245	0	0.000246031	0.000616559	0	0	0.000602658	0
Firmicutes	Clostridia	Lachnospirales	Lachnospiraceae	unclassified_Lachnospiraceae	unclassified_Lachnospiraceae	0.00818249	0.00756498	0.000804484	0.00138664	0.0027198	0.00411686	0.000631161	0	0.000198744	0.0213087	0.000129524	0.00016931	0.000176527	0.000821214	0.023192	0.00168801	0.01351	2.63262e-05	0.0373581	0.0572425	0.0975245	0.0884105	0.107906	0.0957394	0.0346482	0.0494153	0.0582411	0.0551339	0.0894768	0.0780146	0.090221	0.0901791	0.106045	0.066123	0.0462282	0.06269
Firmicutes	Clostridia	Lachnospirales	unclassified_Lachnospirales	unclassified_Lachnospirales	unclassified_Lachnospirales	0	0	0	0	0	0	0	0	0	0	0	0	0	0	0	0	0	0	0	0	0	0	0	0	0	0	0	0	0	0	0	2.936e-05	0	0	0	0
Firmicutes	Clostridia	Monoglobales	Monoglobaceae	Monoglobus	unclassified_Monoglobus	0.000236792	0.000119657	0.000107264	1.28393e-05	0	0.000383887	0	0	0	0.00157893	0	0	0	2.64908e-05	0.000496086	5.48945e-05	0.000420915	0	0.00179214	0.00258944	0.00622868	0.00338805	0.00163493	0.00353421	0.00300173	0.00271529	0.00215169	0.00239383	0.0013955	0.00147504	0.00102754	0.00135056	0.00319405	0.00262405	0.00226364	0.00418942
Firmicutes	Clostridia	Monoglobales	Monoglobaceae	Monoglobus	uncultured_Clostridiaceae_bacterium	0	6.64761e-05	0	0	0	0	0	0	0	0	0	0	0	0	0	0	0	0	0	0.000361653	0.000116152	0	0.000237809	0.000105274	0	0.000394155	0	4.54525e-05	0	0	0	8.80799e-05	0	0	0	0
Firmicutes	Clostridia	Monoglobales	Monoglobaceae	Monoglobus	uncultured_Clostridiales_bacterium	0	0	0	0	0	0	0	0	0	0.000137299	0	0	0	1.32454e-05	8.26811e-05	0	0	0	0.000364256	0	0.000362976	0.000116829	0	0.00018047	0	0	0.000232616	6.06033e-05	0	0	0	0	0	8.94561e-05	8.81938e-05	0.00071084
Firmicutes	Clostridia	Monoglobales	Monoglobaceae	Monoglobus	uncultured_Clostridium_sp.	0.000618291	0.000106362	0	0	0	0	0	0	0	0.000356976	0	0	2.7158e-05	0	0.000689009	9.60654e-05	0.000162935	0	0	0.000289323	0.000246824	0.000467317	7.43152e-05	0.000150392	0	0.000145983	0	0.000151508	0.000825293	0.00140128	0.000694676	0	0.00176475	0	0.000249882	0.000362982
Firmicutes	Clostridia	Monoglobales	Monoglobaceae	Monoglobus	uncultured_rumen_bacterium	0.000210482	0	0	0	0	0	0	0	0	0.000164758	0	0	0	0	0.000261823	0	0.000108623	0	0	0.000144661	0	0	0.000118904	0	9.05046e-05	0	0.000116308	0.000121207	0	0	0	0.00016148	0	0	0	0
Firmicutes	Clostridia	Monoglobales	Monoglobaceae	Monoglobus	uncultured_rumen_bacterium_4C28d_12	0	0	0	0	0	0	0	0	0	0	0	0	0	0	0	0	0	0	0.000145703	0	0	0	0	0	0.000392186	0.000189778	0.000189	0	0	0	0	0	0.000131262	0	0.000499765	0
Firmicutes	Clostridia	Oscillospirales	Butyricicoccaceae	Butyricicoccus	unclassified_Butyricicoccus	9.20859e-05	0	0	0	0	0	0	0	0	0	0	0	0	5.29815e-05	0	0	0	0	0.00399225	0	0	0	0.00187274	0	0.00143299	0.00237953	0.00319846	0.00130297	0.000375133	0	0.000868345	0.000733999	0	0	0.00183737	0
Firmicutes	Clostridia	Oscillospirales	Butyricicoccaceae	UCG_008	unclassified_UCG_008	0	9.30665e-05	0	0	1.30134e-05	0	0	0	0	8.23791e-05	0	0	0	0	0.000385845	0	0	1.31631e-05	0.000699372	0.0144517	0.000261343	0.00750628	0.000505343	0.000857233	0.000241346	0	0.000610616	0.000212112	0.000765272	0.00703592	0.00173669	0.000675279	0.00332531	0.00259423	0.000485066	0.000453727
Firmicutes	Clostridia	Oscillospirales	Butyricicoccaceae	UCG_009	unclassified_UCG_009	0	0	0	0	0	0	0	0	0	0	0	0	0	0	0	0	0	1.31631e-05	0.000480818	0.00251711	0.00181488	0.00315439	0.00270507	0.00174454	0.00354476	0.00367878	0.00622247	0.000621184	0.00387137	0.00302382	0.000549952	0.000851439	0.00173558	0.00502445	0.000911336	0.00617069
Firmicutes	Clostridia	Oscillospirales	Butyricicoccaceae	unclassified_Butyricicoccaceae	unclassified_Butyricicoccaceae	0.000289413	0	0	0	0	0	4.02868e-05	0	0	0.000302057	0	0	4.07371e-05	0.000105963	0.000330724	8.23418e-05	0	0	0.00059738	0.00219885	0.00103085	0.000496524	0.00111473	0.00118809	0.000377102	0.000496343	0.00645508	0.000757541	0.00981348	0.00287632	0.00803219	0.00469759	0.002669	0.00189349	0.00407161	0.0014973
Firmicutes	Clostridia	Oscillospirales	Hungateiclostridiaceae	Fastidiosipila	Clostridiales_bacterium_feline_oral_taxon_339	0	0	0	0	0	0	0	0	0	0	0	0	0	0	0	0	0	0	0	0	0	0	0	0	0	0	0	0	0	0	0	0	0	0	0	0
Firmicutes	Clostridia	Oscillospirales	Hungateiclostridiaceae	Fastidiosipila	Fastidiosipila_sanguinis	0	0	0.000589955	0.000192589	9.10936e-05	0.000238275	0	0	0	8.23791e-05	0	0	8.14741e-05	0	2.75604e-05	0	0	0	0	0	0	0	0	3.00784e-05	0	0	0	0	0	0	0	0	0	0	0	0
Firmicutes	Clostridia	Oscillospirales	Hungateiclostridiaceae	Fastidiosipila	unclassified_Fastidiosipila	0.000736687	0.00198099	0.0218954	0.00178466	0.00122326	0.000450075	1.34289e-05	2.66944e-05	0	0.00164758	0	0	9.50532e-05	1.32454e-05	8.26811e-05	0	6.78896e-05	0	0	0	0	0	0	0	0	1.45983e-05	0	0	0	0	0	0	0	0	0	0
Firmicutes	Clostridia	Oscillospirales	Hungateiclostridiaceae	Fastidiosipila	uncultured_Clostridium_sp.	5.26205e-05	0	1.34081e-05	8.98749e-05	0	0	0	0	0	0.000109839	0	0	0	0	0	0	0	0	0	0	0	0	0	0	0	0	0	0	0	0	0	0	0	0	0	0
Firmicutes	Clostridia	Oscillospirales	Hungateiclostridiaceae	Saccharofermentans	unclassified_Saccharofermentans	0	0	0	0	0	2.6475e-05	0	0	0	0.000480545	0	0	0	6.62269e-05	0.00107485	5.48945e-05	0.00111339	0	0	0	0	0	0	0	0	0	0	0	0	0	0	0	0	0	0	0
Firmicutes	Clostridia	Oscillospirales	Hungateiclostridiaceae	Thermoclostridium	Clostridium_sp._TG60_81	0	0	0	0	0	0	0	0	0	2.74597e-05	0	0	0	0	0	0	0	0	0	0	0	0	0	0	0	0	0	0	0	0	0	0	0	0	0	0
Firmicutes	Clostridia	Oscillospirales	Hungateiclostridiaceae	UCG_012	uncultured_rumen_bacterium	0	0	0	0	0	0	0	0	0	0	0	0	0	0	0	0	0	0	0	0	0	0	0	0	0	0	0	0	0	0	0	0	0	0	0	0.00158805
Firmicutes	Clostridia	Oscillospirales	Hungateiclostridiaceae	unclassified_Hungateiclostridiaceae	unclassified_Hungateiclostridiaceae	0	0	0	0	0	2.6475e-05	0	0	0	0	2.59047e-05	0	0	0	4.13405e-05	0	0	0	0	0	0	0	0	0	0	0	0	0	0	0	0	0	0	0	0	0
Firmicutes	Clostridia	Oscillospirales	Hydrogenoanaerobacterium	unclassified_Hydrogenoanaerobacterium	unclassified_Hydrogenoanaerobacterium	0	0	2.68161e-05	0	0	0	0	0	0	0	0	0	0	0	0	0	0	0	0	0	2.90381e-05	0	0	7.51959e-05	0	0	0	0	0	7.37518e-05	0	0	0	0	0	6.0497e-05
Firmicutes	Clostridia	Oscillospirales	Oscillospiraceae	Colidextribacter	Anaerostipes_hadrus	0	0	0	0	0	0	0	0	0	0	0	0	0	0	0	0	0	0	0	0.00018806	0	0	0	0	0.000241346	0	0.000116308	0.000106056	0.000195069	0	0.000405227	0.000381679	0	0	0.000382173	0
Firmicutes	Clostridia	Oscillospirales	Oscillospiraceae	Colidextribacter	Colidextribacter_massiliensis	0	0	0	0	0	0	0	0	0	0	0	0	0	0	0	0	0	0	0	0	0	0	0	0	0	0	0	0	0	0	0	0	0	0	5.87959e-05	0
Firmicutes	Clostridia	Oscillospirales	Oscillospiraceae	Colidextribacter	unclassified_Colidextribacter	0	3.98857e-05	0	0	0	0	0	0	0	0	0	0	0	0	0.000124022	0	0	0	0.000320546	0.000810103	0.000958258	0.000613354	0.000520206	0.000466214	0.000437439	0.00035036	0	0.000121207	0.00154555	0.00110628	0.000246031	0.00020552	0.000568803	0.000939289	0.000249882	0.00136118
Firmicutes	Clostridia	Oscillospirales	Oscillospiraceae	Colidextribacter	uncultured_Clostridia_bacterium	0	0	0	0	0	0	0	0	0	0	0	0	0	0	0	0	0	0	0	0	0.000101633	0	0	0	0	0	0	0	0	0	0	0	0	0	0	0
Firmicutes	Clostridia	Oscillospirales	Oscillospiraceae	Flavonifractor	unclassified_Flavonifractor	0	0	0	0	0	0	0	0	0	0	0	0	0	0	0	0	0	0	0	0	0	0	0	0	0	0	0	0	0	0	0	4.40399e-05	0	0	0	0
Firmicutes	Clostridia	Oscillospirales	Oscillospiraceae	Intestinimonas	Flavonifractor_plautii	0	0	0	0	0	0	0	0	0	0	0	0	0	0	0	0	0	0	0	0	0.000188748	0	8.91782e-05	0	0	0	0	0	0	0	0	0	8.75082e-05	0	0	0
Firmicutes	Clostridia	Oscillospirales	Oscillospiraceae	Intestinimonas	Intestinimonas_timonensis	0	0	0	0	0	0	0	0	0	0	0	0	0	0	0	0	0	0	0	0	0	0	0	0	0.000543027	0	0.000145385	0	0	0	0	0	0	0	0	0
Firmicutes	Clostridia	Oscillospirales	Oscillospiraceae	Intestinimonas	unclassified_Intestinimonas	0	0	0	0	0	0	0	0	0	0	0	0	0	0	0	0	0	0	0	0.000115729	8.71143e-05	0.000131433	0	9.02351e-05	0	0	0	0	0.00022508	8.85021e-05	4.34172e-05	0	0	0	0.00014699	9.07455e-05
Firmicutes	Clostridia	Oscillospirales	Oscillospiraceae	NK4A214_group	Lachnospiraceae_bacterium_19gly4	0	0	0	0	0	0	0	0	0	0	0	0	0	0	2.75604e-05	0	0	0	0.000174843	0	0	4.3811e-05	7.43152e-05	0	0	0	0.000159923	0	0	0.000103252	0	0	0.000102093	0	0	0
Firmicutes	Clostridia	Oscillospirales	Oscillospiraceae	NK4A214_group	unclassified_NK4A214_group	0.00426226	0.000358971	0.000107264	7.70357e-05	0.000169174	0.00154879	0.000107432	0	1.32496e-05	0.00422879	2.59047e-05	2.82183e-05	9.50532e-05	0.000397362	0.00252177	0.000205855	0.000936876	0	0.0124139	0.0260101	0.0395789	0.0489953	0.0233052	0.0318981	0.0248888	0.0236055	0.0282046	0.0193628	0.0220728	0.0284829	0.0182787	0.00513799	0.0315613	0.0404938	0.0290599	0.0742903
Firmicutes	Clostridia	Oscillospirales	Oscillospiraceae	NK4A214_group	uncultured_rumen_bacterium	0.00168386	0	0	0	0	0	0	0	0	0	0	0	0	0	0	0	0	0	0.00185042	0	0	0	0.00123363	0	0.00194585	0.00372257	0.004914	0.000666636	0.000570202	0	0.000535479	0.000924839	0.00134179	0.000670921	0.000837841	0
Firmicutes	Clostridia	Oscillospirales	Oscillospiraceae	Oscillibacter	Lactobacillales_bacterium_DJF_B280	0	0	0	0	0	0	0	0	0	0	0	0	0	0	0	0	0	0	0	0	0	0	4.45891e-05	0	0	0	0	0	0	0	0	0	0	0	0.000529163	0
Firmicutes	Clostridia	Oscillospirales	Oscillospiraceae	Oscillibacter	unclassified_Oscillibacter	0	0.000159543	0	0	0	2.6475e-05	0	0	0	0	0	0	0	0	0.000813031	0	0	0	0.000276835	0.0063651	0.00619964	0.00455634	0.00434001	0.00440648	0.00194585	0.00738675	0.00428885	0.00448464	0.00381135	0.00172579	0.00261951	0.0012478	0.00434624	0.00891579	0.00417451	0.0074865
Firmicutes	Clostridia	Oscillospirales	Oscillospiraceae	Oscillibacter	uncultured_Clostridiales_bacterium	0	0	0	0	0	0	0	0	0	0	0	0	0	0	0	0	0	0	0	0.000390585	0.000406534	0	0	9.02351e-05	0.000422355	0.000496343	0.000436154	0	0.000330117	0	0	0	0.000306279	0.000477099	0.000455668	0.000362982
Firmicutes	Clostridia	Oscillospirales	Oscillospiraceae	Oscillospira	unclassified_Oscillospira	0.00190749	0.000518514	9.38564e-05	0	0	0.000145612	0	0	0	0.000192218	0	1.41091e-05	0	0	0.000330724	0	0	5.26524e-05	0.00453135	0.0298436	0.0100181	0.00809043	0.00823412	0.00260178	0.010046	0.0153282	0.00524839	0.0119389	0.0187717	0.00784719	0.0265424	0.0136083	0.0175891	0.0415524	0.0142433	0.00603457
Firmicutes	Clostridia	Oscillospirales	Oscillospiraceae	Oscillospira	uncultured_Lactobacillus_sp.	0	0	0	0	0	0	0	0	0	0	0	0	0	0	0	0	0	0	0	8.67968e-05	0	0	0	0	0	0	0	0	0	0	0	0	0	0	4.40969e-05	0
Firmicutes	Clostridia	Oscillospirales	Oscillospiraceae	Papillibacter	unclassified_Papillibacter	0	0	0	0	0	0	0	0	0	0	0	0	0	0	0	0	0	0	0	0	0.000450091	0.000394299	0.000222946	0.000285744	0	0	0	7.57541e-05	0	0.000147504	7.2362e-05	2.936e-05	0	0	2.93979e-05	0.000408355
Firmicutes	Clostridia	Oscillospirales	Oscillospiraceae	Pseudoflavonifractor	unclassified_Pseudoflavonifractor	3.94654e-05	0	0	0	0	0	0	0	0	0	0	0	0	0	0	0	0	0	0.000203984	0	0	0	0	0	0	0	0	0	0	0	0	0	0	0	0	0
Firmicutes	Clostridia	Oscillospirales	Oscillospiraceae	UCG_002	unclassified_UCG_002	0.00392023	0.000186133	0	0.000141232	0	0.00100605	0.000107432	0	0	0.0015652	0	0	6.78951e-05	0.000291398	0.00202569	0.00030192	0.000543117	0	0.0123556	0.0229288	0.0302577	0.0296746	0.0253712	0.0298377	0.0282374	0.0241456	0.0133318	0.023408	0.0137749	0.0157239	0.0111582	0.00582795	0.0238752	0.0275376	0.0197701	0.0350731
Firmicutes	Clostridia	Oscillospirales	Oscillospiraceae	UCG_002	uncultured_rumen_bacterium	0.000631446	0	0	0	5.20535e-05	0	0	0	0	0	0	0	0	0	0	0	0	0	0.00405053	0.00253157	0.0037314	0.000408902	0.00481562	0.000691802	0.00428388	0.00770792	0.00561185	0.00404527	0.00346623	0.0019323	0.00144724	0.00192308	0.00269817	0.00156548	0.00368944	0.000196615
Firmicutes	Clostridia	Oscillospirales	Oscillospiraceae	UCG_003	Marseillibacter_massiliensis	0	0	0	0	0	0	0	0	0	0	0	0	0	0	0	0	0	0	0	0	0	0	0	0	0	0	0	0	0	0	0	0	0	0	0	0
Firmicutes	Clostridia	Oscillospirales	Oscillospiraceae	UCG_003	unclassified_UCG_003	5.26205e-05	0	0	0	0	0	0	0	0	0	0	0	0	0	0	0	0	0	0.000932496	0	0	0	0.000639111	0	0.000181009	0.000394155	0.000886847	0.000287866	0.000405144	0	0.000217086	8.80799e-05	0	5.96374e-05	0.000323377	0
Firmicutes	Clostridia	Oscillospirales	Oscillospiraceae	UCG_005	unclassified_UCG_005	0.0066828	0.000438742	0.000375426	0.000154071	9.10936e-05	0.000436837	8.05737e-05	0	0	0.00266359	0	0	6.78951e-05	0.000317889	0.00157094	0	0.00105908	5.26524e-05	0.015357	0.0699148	0.0351506	0.0485864	0.0698563	0.0577053	0.0176635	0.0390213	0.0651469	0.0225444	0.0574254	0.0469504	0.0497127	0.0486641	0.045971	0.0779014	0.0540628	0.032986
Firmicutes	Clostridia	Oscillospirales	Oscillospiraceae	UCG_005	uncultured_bacterium_adhufec108	0	0	0	0	0	0	0	0	0	0	0	0	0	0	0	0	0	0	0	0	0	0	8.91782e-05	6.01567e-05	0	2.91967e-05	5.81539e-05	0	0	8.85021e-05	0	0	2.91694e-05	0	0	0
Firmicutes	Clostridia	Oscillospirales	Oscillospiraceae	UCG_005	uncultured_prokaryote	0	0	0	0	0	0	0	0	0	0	0	0	0	0	0	0	0	0	0	0	0	0	0	0	0	0	0.000523385	0.00216657	0.000735261	0	0.000665731	0	0	0	0.00110242	0
Firmicutes	Clostridia	Oscillospirales	Oscillospiraceae	UCG_005	uncultured_rumen_bacterium	0	0	0	0	0	7.9425e-05	0	0	0	9.6109e-05	0	0	0	0	0.000344504	0	2.71558e-05	0	0.000145703	0.00190953	0.0101198	0.00457094	0.00584117	0.00878288	0.000784373	0.000408753	0.00218077	0.000333318	0.000345123	0.00140128	0.000651258	0.00011744	0.00169183	0.00332479	0.00124941	0.0065488
Firmicutes	Clostridia	Oscillospirales	Oscillospiraceae	UCG_007	unclassified_UCG_007	0	0	0	0	0	0	0	0	0	0	0	0	0	0	0	0	0	0	0	4.33984e-05	0	0	0	7.51959e-05	0	0	0	0	0	0	0	0	0	0	0	0
Firmicutes	Clostridia	Oscillospirales	Oscillospiraceae	V9D2013_group	unclassified_V9D2013_group	0	0	0	0	0	0	0	0	0	0	0	0	0	0	0	0	0	0	0	0	0	0	0	0	0	0	0	0	0	0	0	0	0	0	0	0
Firmicutes	Clostridia	Oscillospirales	Oscillospiraceae	V9D2013_group	uncultured_rumen_bacterium	0	0	0	0	0	0	0	0	0	0	0	0	0	0	0	0	0	0	0	0	2.90381e-05	0	0	0	0	0	0	0	0	0	0	0	0	0	0	0
Firmicutes	Clostridia	Oscillospirales	Oscillospiraceae	unclassified_Oscillospiraceae	unclassified_Oscillospiraceae	0.000355188	3.98857e-05	4.02242e-05	0	2.60268e-05	0	2.68579e-05	0	0	0.000439355	1.29524e-05	2.82183e-05	5.43161e-05	0.000119208	0.000454746	4.11709e-05	5.43117e-05	0	0.00103449	0.0147555	0.00814519	0.0136544	0.012693	0.0143925	0.00832642	0.00910936	0.00543739	0.00837841	0.00892817	0.00914522	0.00756907	0.00562243	0.012397	0.0138508	0.00718779	0.0127951
Firmicutes	Clostridia	Oscillospirales	Oscillospiraceae	unclassified_Oscillospiraceae	uncultured_rumen_bacterium	0.000197327	0	0	0	0	0	0	0	0	0	0	0	0	0	0	0	0	0	0.000451678	0.000665442	0.00113249	0.00221976	0.000921508	0.00159415	0	0.00102188	0.00110492	0	0.00135048	0.00212405	0.00104201	0	0.00129804	0.000536737	0.00057326	0
Firmicutes	Clostridia	Oscillospirales	Oscillospiraceae	uncultured_rumen_bacterium	uncultured_rumen_bacterium	0	0	0	0	0	0	0	0	0	5.49194e-05	0	0	0	0	0	0	0	0	0	0	0	0	0	0	0	0	0	0	0	0	0	0	0	0	0	0
Firmicutes	Clostridia	Oscillospirales	Ruminococcaceae	Anaerofilum	unclassified_Anaerofilum	0	0	0	0	0	0	0	0	0	0	0	2.82183e-05	0	0	0	0	0	0	0	0	0	0	0	0	4.52523e-05	0	0	0	0	0	0	0	0	0	0	0
Firmicutes	Clostridia	Oscillospirales	Ruminococcaceae	Anaerotruncus	unclassified_Anaerotruncus	0	0	0	0	0	0	2.68579e-05	0	0	0	0	0	0	0	0	0	0	0	0	0	0	0	0	0	4.52523e-05	0	0	0	0	0	0	0	0	0	0	0
Firmicutes	Clostridia	Oscillospirales	Ruminococcaceae	Angelakisella	Ruminococcus_sp._Marseille_P3217	0	0	0	0	0	0	0	0	0	0	0	0	0	0	0	0	0	0	0	0	0	0	0	0	6.03364e-05	0	0	0	0	0	0	0	0	0	0	0
Firmicutes	Clostridia	Oscillospirales	Ruminococcaceae	Candidatus_Soleaferrea	Ruminococcaceae_bacterium_GD6	0	0	0	0	0	0	0	0	0	0	0	0	0	0	0	0	0	0	0	0	0	0	0	0	0	0	2.9077e-05	0	0	0	0	0	0	0	0	0
Firmicutes	Clostridia	Oscillospirales	Ruminococcaceae	Candidatus_Soleaferrea	unclassified_Candidatus_Soleaferrea	0.000118396	6.64761e-05	1.34081e-05	0	0	0.00026475	4.02868e-05	0	0	0.000260867	0	0	0	0.000251662	0.000881931	5.48945e-05	0.000135779	0	0.000233124	0.00341401	0.00284574	0.00419125	0.00276452	0.00311311	0.00152349	0.00169341	0.002835	0.00110601	0.000510181	0.00191755	0.000535479	0.0002936	0.00374827	0.00404043	0.00176388	0.00248038
Firmicutes	Clostridia	Oscillospirales	Ruminococcaceae	Candidatus_Soleaferrea	uncultured_Acetanaerobacterium_sp.	0	0	0	0	0	0	0	0	0	0	0	0	0	0	0	0	0	0	0	0	0	0	0	0	0	0	0	0	0	0	0	0	0	0	0	0
Firmicutes	Clostridia	Oscillospirales	Ruminococcaceae	Candidatus_Soleaferrea	uncultured_Anaerotruncus_sp.	0	0	0	0	0	0	0	0	0	0	0	0	0	0	0	0	0	0	0	0	0	0	0	0	3.01682e-05	0	0	0	0	0	0	0	0	0	0	0
Firmicutes	Clostridia	Oscillospirales	Ruminococcaceae	Candidatus_Soleaferrea	uncultured_rumen_bacterium	0	0	0	0	0	0	0	0	0	0	0	0	0	0	0	0	0	0	0	5.78645e-05	0.000246824	0.00113909	0	0.000240627	0	0	0.000174462	4.54525e-05	0	7.37518e-05	0	0	0	0	0.00014699	0
Firmicutes	Clostridia	Oscillospirales	Ruminococcaceae	Caproiciproducens	unclassified_Caproiciproducens	0	0	0	0	0	0	0	0	0	4.11896e-05	0	0	0	0	0	0	0	0	0	0.000159127	0	0.000116829	0	7.51959e-05	0	0	0	0	0	0	0	0	0	0	0	0
Firmicutes	Clostridia	Oscillospirales	Ruminococcaceae	Faecalibacterium	unclassified_Faecalibacterium	0.000684067	0	0	0	0	0.000145612	0	0	0	0.000356976	0	0	0	7.94723e-05	0.000151582	9.60654e-05	0	2.63262e-05	0.0583976	0.00206866	0.00107441	0.000730183	0.00903673	0.000571489	0.0158685	0.0105984	0.0198741	0.0103026	0.00613718	0.00132753	0.0046167	0.0258955	0.00212937	0.000864742	0.0149782	0.000438603
Firmicutes	Clostridia	Oscillospirales	Ruminococcaceae	Fournierella	unclassified_Fournierella	0.00285466	6.64761e-05	0	0	0	0	0	0	0	0.000329516	0	0	0	2.64908e-05	0.000206703	8.23418e-05	0	0	0.00569697	0.00577198	0.00461706	0.00207372	0.00197678	0.00105274	0.00366543	0.00547437	0.003402	0.000378771	0.00333118	0.00384984	0.00712042	0.00277452	0.00459418	0.00138657	0.00199906	0.00263162
Firmicutes	Clostridia	Oscillospirales	Ruminococcaceae	Fournierella	uncultured_Firmicutes_bacterium	0	0	0	0	0	0	0	0	0	0	0	0	0	0	0	0	0	0	0	0	0	0	0	0	0	0	0	0.000121207	0	0	0	0	0	0	0	0
Firmicutes	Clostridia	Oscillospirales	Ruminococcaceae	Incertae_Sedis	unclassified_Incertae_Sedis	0.000526205	5.31809e-05	0.0100829	0.00017975	0	7.9425e-05	0	0	0	0	0	0	2.7158e-05	0	0.000192923	8.23418e-05	0.000162935	0	0.00180671	0.00104156	0.00116152	0.0011829	0.00203624	0.000436136	0.000935214	0.00283208	0.00440516	0.00203021	0.00195069	0.000457261	0.00102754	0.00218732	0.00100634	0.00135675	0.00099953	0.000695715
Firmicutes	Clostridia	Oscillospirales	Ruminococcaceae	Negativibacillus	unclassified_Negativibacillus	5.26205e-05	0	0	0	0	0	0	0	0	0	0	0	0	0	0	0	0	0	0.000189413	0.00140321	0.00341198	0.00226357	2.97261e-05	0.000255666	0.000271514	0.00268609	0.00047977	0.000969653	0.00181564	0.0019323	0.00133146	0.000939518	0.0016189	0.00396589	0.00127881	0.000332733
Firmicutes	Clostridia	Oscillospirales	Ruminococcaceae	Paludicola	unclassified_Paludicola	0	0	0	0	0	3.97125e-05	0	0	0	0	0	0	0	0	0	0	0	0	0	8.67968e-05	0.000130672	0.000292073	0	0.000210548	0.000105589	0.000102188	0	0	0.000525186	0	0	0	0.000262525	0.00023855	0.000220484	0
Firmicutes	Clostridia	Oscillospirales	Ruminococcaceae	Pygmaiobacter	Pygmaiobacter_massiliensis	0	0	4.02242e-05	0	0	0	0	0	0	0	0	0	0	0	0	0	0	0	0	0	0	0	0	0	0	0	0	0	0	0	0	0	0	0	0	0
Firmicutes	Clostridia	Oscillospirales	Ruminococcaceae	Pygmaiobacter	unclassified_Pygmaiobacter	0	0	0	0	0	0	0	0	0	0	0	0	0	0	0	0	0	0	0.000203984	0.000332721	0.000246824	0.000175244	0.000118904	0.000120313	0	0.000773711	0.000203539	0.000166659	0.000315112	0.000309757	0.000448645	0.000352319	0.000204186	0.000432371	0.000529163	0.000166367
Firmicutes	Clostridia	Oscillospirales	Ruminococcaceae	Ruminococcus	Clostridiaceae_bacterium_DJF_VR76	0	0	0	0	0	0	0	0	0	0	0	0	0	0	0	0	0	0	0.00227296	0	0	0	0	0	0.00368052	0	0.000218077	0.000757541	0	4.42511e-05	0	0.000924839	0	0	0.000220484	0
Firmicutes	Clostridia	Oscillospirales	Ruminococcaceae	Ruminococcus	Ruminococcus_albus	0	0	0	0	0	0	0	0	0	0	0	1.41091e-05	0	0	0	0	0	0	0	0	0	0	0	0	0	0	0	0	0	0	0	0	0	0	0	0
Firmicutes	Clostridia	Oscillospirales	Ruminococcaceae	Ruminococcus	Ruminococcus_bicirculans	2.63103e-05	0	0	0	0	0	0	0	0	0	0	0	0	0	0	0	0	0	0	0	0	0	0	0	0	7.29916e-05	0.000101769	0	0	0	0	0	0	0	0	0
Firmicutes	Clostridia	Oscillospirales	Ruminococcaceae	Ruminococcus	Ruminococcus_callidus	0	0	0	0	0	0	0	0	0	0	0	0	0	0	0	0	0	0	0.000174843	0	0	0	0.000847193	0	0	0	0.000145385	4.54525e-05	0	0	0	0.00010276	0.000131262	0	0.000205786	0
Firmicutes	Clostridia	Oscillospirales	Ruminococcaceae	Ruminococcus	Ruminococcus_flavefaciens	0	7.97713e-05	0	0	0	0.00026475	0	0	1.32496e-05	0.000453085	0	0	0	0	0.000372065	0	0.000678896	0	0	0.00122962	0	0.00259945	0	0.00342893	0	0	0.000261693	0	0	0.000221255	0	0	7.29235e-05	0.00240041	0.000220484	0
Firmicutes	Clostridia	Oscillospirales	Ruminococcaceae	Ruminococcus	Ruminococcus_sp._HUN007	0	0	0	1.28393e-05	0	0.000172087	0	0	0	0.000164758	0	0	0	0	0.000385845	0	0	0	0	0.000694374	0.00858076	0.00452713	0.000847193	0.00303791	0	0.00145983	0.00949362	0	0	0.000398259	0.000274976	0	0.000860497	0.00237059	0.000734948	0.000468852
Firmicutes	Clostridia	Oscillospirales	Ruminococcaceae	Ruminococcus	unclassified_Ruminococcus	0.000631446	0.000771123	0.000321793	0	5.20535e-05	0.000913387	2.68579e-05	0	0	0.00223797	0	1.41091e-05	4.07371e-05	0.000754987	0.00234263	0.000233302	0.000434493	1.31631e-05	0.00291405	0.0070884	0.00333938	0.00489223	0.0106271	0.00634653	0.00241346	0.00255471	0.00511754	0.00533309	0.00622721	0.00266981	0.00557188	0.00779507	0.00684022	0.00556119	0.00223424	0.00331221
Firmicutes	Clostridia	Oscillospirales	Ruminococcaceae	Ruminococcus	uncultured_Ruminococcus_sp.	0	0	4.02242e-05	0	0	0	0	0	0	0	0	0	0	0	0	0	5.43117e-05	0	0	0	0	0.000175244	0.000460754	0.000406058	0	0	0	6.06033e-05	0.00067524	0	0	5.87199e-05	5.83388e-05	0.000313096	0	0
Firmicutes	Clostridia	Oscillospirales	Ruminococcaceae	Subdoligranulum	unclassified_Subdoligranulum	0.00936645	0.000452037	0.000496098	0.000231107	6.50669e-05	0.000542737	2.68579e-05	5.33889e-05	6.6248e-05	0.00737293	0	5.64366e-05	0.000339476	0.000503325	0.00104729	0.0007548	0.000706052	6.58155e-05	0.0521615	0.00214099	0.000522686	0.00213213	0.0139564	0.000797076	0.0406818	0.0312842	0.0208918	0.0145599	0.0209624	0.00915997	0.0148921	0.0351879	0.00889667	0.00433862	0.015919	0.00148218
Firmicutes	Clostridia	Oscillospirales	Ruminococcaceae	Subdoligranulum	uncultured_Faecalibacterium_sp.	0.00172332	0	0	0	0	0	0	0	0	0	0	0	0	0	0	0	0	0	0.00727055	0.000853502	0.000493648	0.000540335	0.00270507	0.000165431	0.00155366	0.00636487	0.00652778	0.000939351	0.00442657	0.00535438	0.004197	0.00368467	0.00482754	0.00178912	0.00587959	0
Firmicutes	Clostridia	Oscillospirales	Ruminococcaceae	UCG_001	unclassified_UCG_001	0	0	0	0	0	0	0	0	0	0	0	0	0	0	0	0	0	0	0	0	0	0	0	0.000270705	0	0	0	0	0	0	0	0	0	0	0	9.07455e-05
Firmicutes	Clostridia	Oscillospirales	Ruminococcaceae	[Eubacterium]_siraeum_group	unclassified_[Eubacterium]_siraeum_group	0	0.000624875	0.000147489	0	1.30134e-05	0.000357412	0	1.33472e-05	0	0.000178488	0	0	0	7.94723e-05	0.00074413	4.11709e-05	0.000122201	0	7.28513e-05	0.00189506	0.00288929	0.00175244	0.000743152	0.00383499	0.000392186	0.000773711	0.00162831	0.00109086	0.00265594	0.00414485	0.00305368	0.00120376	0.00259608	0.000954198	0.000470367	0.0240173
Firmicutes	Clostridia	Oscillospirales	Ruminococcaceae	unclassified_Ruminococcaceae	Ruminococcaceae_bacterium_GD7	0	0	0	0	0	0	0	0	0	0	0	0	0	0	0	0	0	0	0	0	0	0	0	0	0.00099555	5.83933e-05	0	7.57541e-05	0	0	0	0	0	0	0	0
Firmicutes	Clostridia	Oscillospirales	Ruminococcaceae	unclassified_Ruminococcaceae	Ruminococcaceae_bacterium_Marseille_P3738	0.000197327	0	0	0	0	0	0	0	0	0	0	0	0	0	0	0	0	0	0.000480818	0.000376119	0	0.000233659	0.00049048	0	0	0.000277368	0.000348923	0.000303017	0.000720256	0.000221255	0.000332865	0.00024956	0.000525049	0.000432371	0.000661453	0
Firmicutes	Clostridia	Oscillospirales	Ruminococcaceae	unclassified_Ruminococcaceae	Ruminococcus_sp._YE281	0	0	0	0	0	0	0	0	0	0.000192218	0	0	0	0	0	0	0	0	0	0.000347187	0	0.000189848	0	4.51175e-05	0	0	0	0	7.50266e-05	0.000339258	0	0	0	0	0	0.000514224
Firmicutes	Clostridia	Oscillospirales	Ruminococcaceae	unclassified_Ruminococcaceae	unclassified_Ruminococcaceae	0.00203904	0.000491923	0.000134081	8.98749e-05	0.000156161	0.00058245	5.37158e-05	4.00416e-05	1.32496e-05	0.00295192	1.29524e-05	0	0	9.27177e-05	0.00195679	0.000425433	0.000760363	1.31631e-05	0.00639634	0.00836142	0.00573503	0.0067761	0.00656946	0.00547426	0.0120824	0.00772251	0.0083887	0.00318167	0.0137899	0.00693266	0.00688887	0.00618027	0.0067673	0.00934816	0.00668803	0.0070479
Firmicutes	Clostridia	Oscillospirales	Ruminococcaceae	unclassified_Ruminococcaceae	uncultured_Clostridium_sp.	0	0	0	0	0	0	0	0	0	0	0	0	0	0	0	0	0	0	0.000145703	0.00105603	0.000232305	0.000671768	0.000416165	0.000421097	0.000482691	0.000335762	0.000101769	0.000136357	0.00045016	0.000177004	0.000260503	4.40399e-05	0.00074382	0.000790196	0.000191087	0.0015578
Firmicutes	Clostridia	Oscillospirales	Ruminococcaceae	unclassified_Ruminococcaceae	uncultured_Firmicutes_bacterium	0	5.31809e-05	0	0	0	0	0	0	0	0	0	0	0	0	0	0	0	0	0	0	0	0	0	0	0	0	0	0	0	0	0	0	0	0	0	0
Firmicutes	Clostridia	Oscillospirales	Ruminococcaceae	uncultured_Ruminococcaceae_bacterium	uncultured_Ruminococcaceae_bacterium	0	0	9.38564e-05	0	0	0	0	0	0	0	0	0	0	0	0	0	0	0	0	0.00140321	0.00307804	0.000613354	0	0.000240627	0	0	0	0	0	0.000988273	0	0	0.000320863	0.000313096	0	0.000120994
Firmicutes	Clostridia	Oscillospirales	Ruminococcaceae	uncultured_rumen_bacterium	uncultured_rumen_bacterium	0	0	0	0	0	0	0	0	0	0	0	0	0	0	0	0	0	0	0	0	0	0	0	0	0	0	0	0	0	0.000162254	0	0	0	0	0	0
Firmicutes	Clostridia	Oscillospirales	UCG_010	unclassified_UCG_010	unclassified_UCG_010	0	0.000119657	9.38564e-05	0	1.30134e-05	2.6475e-05	0	0	0	0.000370706	0	2.82183e-05	6.78951e-05	0.000105963	0.000261823	5.48945e-05	0	0	0.000801364	0.00769598	0.0115136	0.00795899	0.00365631	0.00956492	0.00313749	0.00902177	0.00817062	0.00295441	0.0039464	0.00784719	0.00238795	0.00296536	0.00659228	0.00489027	0.00515934	0.0113734
Firmicutes	Clostridia	Oscillospirales	UCG_010	uncultured_rumen_bacterium	uncultured_rumen_bacterium	0	0	0	0	0	6.61875e-05	0	0	0	8.23791e-05	0	0	0	1.32454e-05	0.000110241	0	0.000149357	0	0	0.000216992	0.000696915	0.00059875	0	0.000646685	0	0.000116787	0.000116308	6.06033e-05	0	0	0	0	0.000452126	0.000387643	0	0.00010587
Firmicutes	Clostridia	Oscillospirales	UCG_011	unclassified_UCG_011	unclassified_UCG_011	0	0	0	0	0	0	0	0	0	0	0	0	0	0	0	0	0	0	0	0	0	0	0	0	0	0	0	0	0	0	0	2.936e-05	0	0	0	0
Firmicutes	Clostridia	Oscillospirales	[Clostridium]_methylpentosum_group	unclassified_[Clostridium]_methylpentosum_group	unclassified_[Clostridium]_methylpentosum_group	0	0	2.68161e-05	0	0	0	0	0	0	0	0	0	0	2.64908e-05	6.89009e-05	0	2.71558e-05	0	8.74215e-05	0.000318255	0.000246824	0	0	6.01567e-05	0.000120673	0.000189778	0	0	0	0	0	1.468e-05	0	4.47281e-05	0	0
Firmicutes	Clostridia	Oscillospirales	[Eubacterium]_coprostanoligenes_group	Clostridiales_bacterium_42_27	unclassified_Clostridiales_bacterium_42_27	0	0	0	0	0	0	0	0	0	0.000288327	0	0	0	0	0	0	0	0	0	0	0.000406534	0.00305216	0.000698563	0.000782037	0	0.00255471	0.0036637	0.000984804	0.00070525	0	0	0.000616559	0.00201269	2.98187e-05	0.00235183	0.000257112
Firmicutes	Clostridia	Oscillospirales	[Eubacterium]_coprostanoligenes_group	Eubacterium_coprostanoligenes	unclassified_Eubacterium_coprostanoligenes	0.00048674	0	0	0	0	0	0	0	0	0	0	0	0	0	0	0	0	0	0.00106363	0	0	0	0	0	0.0019911	0.00221895	0.00223893	0	0	0	0	0.00107164	0	0	0	0
Firmicutes	Clostridia	Oscillospirales	[Eubacterium]_coprostanoligenes_group	unclassified_[Eubacterium]_coprostanoligenes_group	unclassified_[Eubacterium]_coprostanoligenes_group	0.00492002	0.000332381	4.02242e-05	0	7.80803e-05	0.000450075	5.37158e-05	0	0	0.00102974	0	1.41091e-05	4.07371e-05	0.000384116	0.00257689	0.000356814	0.000502383	5.26524e-05	0.00893156	0.0235798	0.0216189	0.0203721	0.0183559	0.0278676	0.01077	0.0479555	0.0152654	0.0243322	0.031091	0.0191607	0.0102609	0.018027	0.0088675	0.0217527	0.00942204	0.0162737
Firmicutes	Clostridia	Oscillospirales	[Eubacterium]_coprostanoligenes_group	uncultured_Clostridia_bacterium	uncultured_Clostridia_bacterium	0	0	0	0	0	0	0	0	0	0	0	0	0	0	0	0	0	0	0	0	0	0	0	0	0	0	0	0	0	0	0	0	0	0	0	0
Firmicutes	Clostridia	Oscillospirales	[Eubacterium]_coprostanoligenes_group	uncultured_Clostridium_sp.	uncultured_Clostridium_sp.	0	0	0	0	0	0.00015885	0	0	0	0.000137299	0	0	0	0	0.000124022	4.11709e-05	0	0	0.000305975	0.000810103	0.00168421	0.00116829	0.000862056	0.000947468	0.000362018	0.00119706	0.000756001	0.00054543	0.000390138	0	0.000434172	0	0.000510465	5.96374e-05	0.0013964	0.00158805
Firmicutes	Clostridia	Oscillospirales	[Eubacterium]_coprostanoligenes_group	uncultured_rumen_bacterium	uncultured_rumen_bacterium	0	0	0	0	0	0	0	0	0	0	0	0	0	0	0	0	0	0	0	0	0.00104537	0.000189848	0	0	0	0	0	0	0	0	0	0	0	0	0	0
Firmicutes	Clostridia	Oscillospirales	unclassified_Oscillospirales	unclassified_Oscillospirales	unclassified_Oscillospirales	2.63103e-05	0	0	0	0	0	0	0	0	0.000109839	0	0	0	0	0.000206703	0	0	0	0.000247694	0.000795637	0.00174229	0.00186927	0.000772878	0.00228595	0.00108605	0.00153282	0.000610616	0.000575731	0.00048017	0.000516262	0.000303921	0.00026424	0.000525049	0.000536737	0.000823142	0.0009982
Firmicutes	Clostridia	Oscillospirales	unclassified_Oscillospirales	uncultured_rumen_bacterium	unclassified_Oscillospirales	0	0	0	0	0	0	0	0	0	0	0	0	0	0	0	0	0	0	0	0	0	0	0	0.000105274	0	0	0	0	0	0	0	0	0	0	0	0
Firmicutes	Clostridia	Peptococcales	Peptococcaceae	Peptococcus	Peptococcus_simiae	0.000210482	0	0	0	0	5.295e-05	0	0	0	0	0	0	0	0	0	0	0	0	0	0	0	0	0	0	0	0	0	0	0	0	0	0	0	0	0	0
Firmicutes	Clostridia	Peptococcales	Peptococcaceae	Peptococcus	Peptococcus_sp._canine_oral_taxon_334	0	2.65904e-05	0	0	0	0	0	0	0	0	0	0	0	0	0	0	0	0	0	0	0	0	0	0	0	0	0	0	0	0	0	0	0	0	0	0
Firmicutes	Clostridia	Peptococcales	Peptococcaceae	Peptococcus	unclassified_Peptococcus	6.57756e-05	6.64761e-05	4.02242e-05	0.000243946	0	0.000132375	0	0	0	0.00126315	0	0	5.43161e-05	0.000105963	0.000399625	9.60654e-05	0.000190091	0	5.8281e-05	0.000245924	0.000348457	0.0020007	0.000193219	0.000315823	0	0.000335762	0.000174462	4.54525e-05	0.000195069	0.000147504	0.000101307	0.0002202	0.000233355	0.000164003	0.000161689	0.000241988
Firmicutes	Clostridia	Peptococcales	Peptococcaceae	unclassified_Peptococcaceae	unclassified_Peptococcaceae	0.000670911	0	0	0	5.20535e-05	9.26625e-05	0	0	0	8.23791e-05	0	0	0	0	0.000234263	0	5.43117e-05	0	0.000830504	0.00228565	0.00225045	0.00221976	0.000817467	0.00162423	0.000573196	0.000744515	0.00123577	0.000560581	0.00121543	0.00138653	0.000709148	0.000616559	0.00172099	0.0011182	0.000955433	0.00213252
Firmicutes	Clostridia	Peptostreptococcales_Tissierellales	Acidaminobacteraceae	Acidaminobacter	unclassified_Acidaminobacter	0	0	0	0	0	0	0	0	0	0	0	0	0	0	0	0	0	0	0	0	0	0	0	0	0	0	0	0	0	0	0	0	2.91694e-05	0	0	0
Firmicutes	Clostridia	Peptostreptococcales_Tissierellales	Alkaliphilus	Firmicutes_bacterium_1229_1IIA	unclassified_Firmicutes_bacterium_1229_1IIA	0	0	0	0	0	0	0	0	0	0	0	0	0	0	5.51207e-05	0	0	0	0	0	0	0	0	0	0	0	0	0	0	0	0	0	0	0	0	0
Firmicutes	Clostridia	Peptostreptococcales_Tissierellales	Anaerovoracaceae	Anaerovorax	unclassified_Anaerovorax	0	0	0	0	0	0	0	0	0	0	0	0	0	0	0	0	0	0	0	0.000361653	0.00015971	0	0	0	0	0	0	0	0	0.000295007	0	0	0.000131262	0	0	0.000226864
Firmicutes	Clostridia	Peptostreptococcales_Tissierellales	Anaerovoracaceae	Family_XIII_AD3011_group	unclassified_Family_XIII_AD3011_group	0.000342033	0.000438742	0.000294977	7.70357e-05	0	0.00132375	9.40026e-05	0	0	0.00586265	0	0	9.50532e-05	0.000291398	0.00427186	0.000494051	0.00164293	0	0.00126761	0.00523674	0.0128348	0.00847012	0.00474131	0.0101364	0.00690851	0.01181	0.00488493	0.00666636	0.00400642	0.00480861	0.00279317	0.000778039	0.00291694	0.00897543	0.00515934	0.0156536
Firmicutes	Clostridia	Peptostreptococcales_Tissierellales	Anaerovoracaceae	Family_XIII_AD3011_group	uncultured_Eubacterium_sp.	0.000499895	0	5.36322e-05	0	0	0	0	0	0	0.000260867	0	0	0	0	0	0	0	0	8.74215e-05	0	0	0	0	0	0	0	0	0	0	0	0	0	0	0	0	0
Firmicutes	Clostridia	Peptostreptococcales_Tissierellales	Anaerovoracaceae	Family_XIII_UCG_001	unclassified_Family_XIII_UCG_001	0.000407809	0	0	0	0	3.97125e-05	0	0	0	0.000508005	0	0	0	5.29815e-05	0.000289384	4.11709e-05	0.000162935	0	8.74215e-05	0	0	0	0	0	0.000105589	0.00026277	0.000334385	0.000242413	0.00045016	0	0.000246031	0.00017616	0	0	0.000161689	0
Firmicutes	Clostridia	Peptostreptococcales_Tissierellales	Anaerovoracaceae	Family_XIII_UCG_001	uncultured_Anaerovorax_sp.	0	0	0	0	0	0	0	0	0	0	0	0	0	0	0	0	0	0	0	0.000289323	0.0003049	8.76219e-05	0.000564795	0.000150392	0	0	0	0	0.000195069	0.000191755	0	0	0.000175016	0.000521827	0	0.000211739
Firmicutes	Clostridia	Peptostreptococcales_Tissierellales	Anaerovoracaceae	Mogibacterium	unclassified_Mogibacterium	0.000118396	0.000106362	0.000388834	0.000128393	0	7.9425e-05	0	0	0	0.00174369	0	0	0	1.32454e-05	0.000647668	0	0.000556695	0	0	0	0.000174229	7.30183e-05	0.000133767	0.000150392	0.000271514	0.000335762	0	9.0905e-05	0.000315112	0.000280257	0.000173669	0.00024956	0.000116678	0.000104365	8.81938e-05	0.00010587
Firmicutes	Clostridia	Peptostreptococcales_Tissierellales	Anaerovoracaceae	Mogibacterium	uncultured_Enterococcus_sp.	0	0	0	0	0	0	1.34289e-05	0	0	8.23791e-05	0	0	0.000285159	0.00169541	5.51207e-05	5.48945e-05	0.000529539	0	0	0	0	0	0	0	0	0	0	0	0	0	0	0	0	0	0	0
Firmicutes	Clostridia	Peptostreptococcales_Tissierellales	Anaerovoracaceae	S5_A14a	Peptostreptococcaceae_bacterium_canine_oral_taxon_333	0.000157862	0	0	0	0	7.9425e-05	0	0	0	0	0	0	0	0	0	0	0	0	0	0	0	0	0	0	0	0	0	0	0	0	0	0	0	0	0	0
Firmicutes	Clostridia	Peptostreptococcales_Tissierellales	Anaerovoracaceae	S5_A14a	uncultured_Anaerovorax_sp.	0	0	0	6.41964e-05	0	0	0	0	0	6.86493e-05	0	0	0	0	0	0	0	0	0	0	0	0	0	0	0	0	0	0	0	0	0	0	0	0	0	0
Firmicutes	Clostridia	Peptostreptococcales_Tissierellales	Anaerovoracaceae	[Eubacterium]_brachy_group	unclassified_[Eubacterium]_brachy_group	0.000960324	0	2.68161e-05	0.000398018	0.00011712	0.000132375	0	0	0	0.000453085	0	0	0	0	0.000110241	8.23418e-05	2.71558e-05	0	0	5.78645e-05	0	0	0	0	0	4.3795e-05	0	0	4.5016e-05	0	0	0	0	0	0	0
Firmicutes	Clostridia	Peptostreptococcales_Tissierellales	Anaerovoracaceae	[Eubacterium]_nodatum_group	Eubacterium_pyruvativorans	0	0	0	0	0	0	0	0	0	0	0	0	0	0	0	0	0	0	0	0	0	0	0	0	3.01682e-05	0	0	0	0	0	0	0	0	0	0	0
Firmicutes	Clostridia	Peptostreptococcales_Tissierellales	Anaerovoracaceae	[Eubacterium]_nodatum_group	Eubacterium_sp._68_3_10	0	0	0	0	0	0	0	0	0	0	0	0	1.3579e-05	0.000145699	0	0	8.14675e-05	0	0	0	0	0	0	0	0	0	0	0	0	0	0	0	0	0	0	0
Firmicutes	Clostridia	Peptostreptococcales_Tissierellales	Anaerovoracaceae	[Eubacterium]_nodatum_group	unclassified_[Eubacterium]_nodatum_group	0.000157862	0.000252609	8.04484e-05	0.000102714	0	0.000344175	8.05737e-05	0	0	0.000192218	0	0	5.43161e-05	0.000238417	0.000137802	0.000192131	0.000380182	0	0.000276835	0.00326934	0.000362976	0.000452713	0.000193219	0.000466214	6.03364e-05	0.00214595	0.000203539	3.03017e-05	0.000510181	0.00575264	0.000752565	0.00184968	0.00211478	0.000387643	0.000808443	0.000846958
Firmicutes	Clostridia	Peptostreptococcales_Tissierellales	Anaerovoracaceae	[Eubacterium]_saphenum_group	unclassified_[Eubacterium]_saphenum_group	0	0	0	0	0	3.97125e-05	0	0	0	0.000233407	0	0	0	0	6.89009e-05	0	2.71558e-05	0	0	0	0	0	0	0	0	0	0	0	0	0	0	0	0	0	0	0.000181491
Firmicutes	Clostridia	Peptostreptococcales_Tissierellales	Anaerovoracaceae	unclassified_Anaerovoracaceae	Peptostreptococcaceae_bacterium_canine_oral_taxon_221	0	0	0	0.00210564	0	0	0	0	0	0	0	0	0	0	0	0	0	1.31631e-05	0	0	0	0	0	0	0	0	0	0	0	0	0	0	0	0	0	0
Firmicutes	Clostridia	Peptostreptococcales_Tissierellales	Anaerovoracaceae	unclassified_Anaerovoracaceae	unclassified_Anaerovoracaceae	0.000249947	0	4.02242e-05	0	0	1.32375e-05	4.02868e-05	0	0	0	0	0	0	0	0	0	0	0	0.00059738	0.00199633	0.00207623	0.00395759	0.000936371	0.00142872	0.000482691	0.00411673	0.00047977	0.00133327	0.00100536	0.00129803	0.000535479	0.0002936	0.00154598	0.000581465	0.00167568	0.00179979
Firmicutes	Clostridia	Peptostreptococcales_Tissierellales	Clostridiisalibacter	unclassified_Clostridiisalibacter	unclassified_Clostridiisalibacter	0	0	0	0	0	0	0	0	0	0	0	0	0	0	0	0	0	0	0	0	0	0	0	0	0	0	0	0	0	0	0	0	0	0	0	0
Firmicutes	Clostridia	Peptostreptococcales_Tissierellales	Family_XI	Anaerococcus	unclassified_Anaerococcus	0.0186408	0.00184804	0.0132874	0.00600878	0.000663682	0.00675112	0.000147718	0.000133472	5.29984e-05	0.00830656	0	2.82183e-05	0.00264791	0.00264908	0.00241153	0.000384262	0.00411411	0	0.000101992	0	0	2.92073e-05	1.4863e-05	6.01567e-05	1.50841e-05	2.91967e-05	0	3.03017e-05	0	5.90014e-05	0.00072362	1.468e-05	0.000189601	0	0	0
Firmicutes	Clostridia	Peptostreptococcales_Tissierellales	Family_XI	Gallicola	unclassified_Gallicola	0.000670911	0	4.02242e-05	6.41964e-05	0	7.9425e-05	0	2.66944e-05	0	4.11896e-05	0	0	6.78951e-05	0.000119208	5.51207e-05	2.74473e-05	0	0	0	0	0	0	0	0	0	0	0	0	0	0	0	0	0	0	0	0
Firmicutes	Clostridia	Peptostreptococcales_Tissierellales	Family_XI	Helcococcus	unclassified_Helcococcus	0.00349926	2.65904e-05	0.000429058	6.41964e-05	0.000273281	0.00115166	0	0	0	5.49194e-05	0	0	0	0	0.000220483	1.37236e-05	9.50454e-05	0	2.91405e-05	0	0	0	0	0	0	0	0	0	0	0	0	1.468e-05	0	0	0	0
Firmicutes	Clostridia	Peptostreptococcales_Tissierellales	Family_XI	Murdochiella	Peptostreptococcaceae_bacterium_canine_oral_taxon_332	0	0	0	0	0	0	5.37158e-05	0	0	4.11896e-05	0	0	0	0	0	4.11709e-05	0	0	0	0	0	0	0	0	0	0	0	0	0	0	0	0	0	0	0	0
Firmicutes	Clostridia	Peptostreptococcales_Tissierellales	Family_XI	Murdochiella	unclassified_Murdochiella	0.000434119	5.31809e-05	0.00048269	1.28393e-05	0	0.000119137	0	0	0	4.11896e-05	0	0	0	0	1.37802e-05	0	2.71558e-05	0	1.45703e-05	0	0	0	0	0	0	1.45983e-05	0	0	0	0	0	0	0	0	0	0
Firmicutes	Clostridia	Peptostreptococcales_Tissierellales	Family_XI	Parvimonas	unclassified_Parvimonas	0	0.000119657	0	0.00663791	2.60268e-05	0.00015885	0	2.66944e-05	2.64992e-05	9.6109e-05	0	0	0	2.64908e-05	0	2.74473e-05	0	7.89785e-05	0	0	0	0	0	0	0	0	0	0	0	0	0	0	0	0	0	0
Firmicutes	Clostridia	Peptostreptococcales_Tissierellales	Family_XI	Peptoniphilus	Peptoniphilus_coxii	0	0	0.000241345	0.000154071	0	0	0	0	0	0	0	0	0	0	0	0	0	0	0	0	0	0	0	0	0	0	0	0	0	0	0	0	0	0	0	0
Firmicutes	Clostridia	Peptostreptococcales_Tissierellales	Family_XI	Peptoniphilus	Peptoniphilus_indolicus	0	0.000119657	0.000107264	0	0	0	0	0	0	0	0	0	0	0	0	0	4.07338e-05	6.58155e-05	0	0	0	0	0	0	0	0	0	0	0	0	0	0	0	0	0	0
Firmicutes	Clostridia	Peptostreptococcales_Tissierellales	Family_XI	Peptoniphilus	Peptoniphilus_stercorisuis	0	0	0	7.70357e-05	0	0	0	0	0	0	0	0	0	0	0	0	0	0	0	0	0	0	0	0	0	0	0	0	0	0	0	0	0	0	0	0
Firmicutes	Clostridia	Peptostreptococcales_Tissierellales	Family_XI	Peptoniphilus	unclassified_Peptoniphilus	0.0015523	9.30665e-05	0.000737443	0.000719	9.10936e-05	2.6475e-05	0	0	0	0.000453085	0	0	0	0.000105963	0.000151582	0	0.000448071	0	1.45703e-05	0	0	0	4.45891e-05	1.50392e-05	0	0	0	0	0	0	1.44724e-05	0	0	1.49094e-05	0	0
Firmicutes	Clostridia	Peptostreptococcales_Tissierellales	Family_XI	Tissierella	unclassified_Tissierella	0	0	0	0.000218268	0	0	0	0	0	0.000151028	0	0	0.000108632	0	2.75604e-05	1.37236e-05	0.000380182	0	0	0	0	0	0	0	0	0	0	0	0	0	0	0	0	0	0	0
Firmicutes	Clostridia	Peptostreptococcales_Tissierellales	Family_XI	W5053	Clostridiales_bacterium_FK041	0.000986634	1.32952e-05	0.000160897	0.000783196	0	0.000132375	2.68579e-05	0	0	0.000356976	0	0	0.000244422	0	0	0	0	0	0	0	1.45191e-05	0	0	0	0	0	0	0	0	0	0	0	0	0	0	0
Firmicutes	Clostridia	Peptostreptococcales_Tissierellales	Family_XI	W5053	Clostridiales_bacterium_SIT13	0	0	0	0	0	0	0	0	0	0.000288327	0	0	0	0	4.13405e-05	0	0	0	0	0	0	0	0	0	0	0	0	0	0	0	0	0	0	0	0	0
Firmicutes	Clostridia	Peptostreptococcales_Tissierellales	Family_XI	W5053	unclassified_W5053	0.00299937	3.98857e-05	0.00034861	0.000346661	2.60268e-05	0	0	0	0	0.000247137	0	0	0	0	0	0	1.35779e-05	0	0	0	0	0	0	0	0	0	0	0	0	0	0	0	0	0	0	0
Firmicutes	Clostridia	Peptostreptococcales_Tissierellales	Family_XI	W5053	uncultured_Clostridia_bacterium	0	0	0	0	5.20535e-05	0	0	0	0	0	0	0	0	0.000357625	0.000151582	0	0.000502383	0	0	0	0	0	0	0	0	0	0	1.51508e-05	0	0	0	0	0	0	0	0
Firmicutes	Clostridia	Peptostreptococcales_Tissierellales	Family_XI	unclassified_Family_XI	Tissierella_sp._canine_oral_taxon_029	0	0	0	5.13571e-05	0	0	0	0	0	0	0	0	0	0	0	0	0	0	0	0	0	0	0	0	0	0	0	0	0	0	0	0	0	0	0	0
Firmicutes	Clostridia	Peptostreptococcales_Tissierellales	Family_XI	unclassified_Family_XI	unclassified_Family_XI	9.20859e-05	0	2.68161e-05	2.56786e-05	1.30134e-05	0	0	0	0	0	0	0	2.7158e-05	0	2.75604e-05	0	5.43117e-05	0	0	0	0	0	0	0	0	0	0	0	0	0	0	0	0	0	0	0
Firmicutes	Clostridia	Peptostreptococcales_Tissierellales	Fusibacteraceae	Fusibacter	unclassified_Fusibacter	0	0	1.34081e-05	1.28393e-05	0	0	0	0	0	0	0	0	0	0	0	0	0	0	0	0	0	0	0	0	0	0	0	0	0	0	0	1.468e-05	0	0	0	0
Firmicutes	Clostridia	Peptostreptococcales_Tissierellales	JTB215	unclassified_JTB215	unclassified_JTB215	0	0	0	0	0	0	0	0	0	0	0	0	0	0	0	0	0	0	0	0	0	0	0	0	0	0	0	0	0	0	0	0	0	0	0	0
Firmicutes	Clostridia	Peptostreptococcales_Tissierellales	Peptostreptococcaceae	Intestinibacter	unclassified_Intestinibacter	0.00606451	0.00203417	0.000737443	0	0	0	0.000268579	0	0	0.00109839	0.000336761	0.00928382	0.00111348	0.000847705	0.0031281	0.00277217	0.00263412	0	0.00308889	0	0.000261343	0	0.000772878	0	0.000618448	0.000992686	0.00360554	0.000954502	0.00189067	0.00085552	0.00276423	0.000998238	0.000393787	0.000998927	0.000661453	0
Firmicutes	Clostridia	Peptostreptococcales_Tissierellales	Peptostreptococcaceae	Peptostreptococcus	unclassified_Peptostreptococcus	0.000210482	2.65904e-05	0.000160897	0.00195157	6.50669e-05	0.0002118	0.000147718	1.33472e-05	0	0.000247137	0	0	4.07371e-05	0	4.13405e-05	0.000329367	0.000203669	3.94893e-05	0	0	0	1.46037e-05	0	0	0	0	0	0	0	0	0	0	0	0	0	0
Firmicutes	Clostridia	Peptostreptococcales_Tissierellales	Peptostreptococcaceae	Proteocatella	Frigovirgula_sp._canine_oral_taxon_032	0	0	0	0.000449375	0	0	0	0	0	0	0	0	0	0	0	0	0	0	0	0	0	0	0	0	0	0	0	0	0	0	0	0	0	0	0	0
Firmicutes	Clostridia	Peptostreptococcales_Tissierellales	Peptostreptococcaceae	Proteocatella	Frigovirgula_sp._canine_oral_taxon_058	0	0	0	0	0	0	0	0	0	0	0	0	0	0	0	0	0	0	0	0	0	0	0	0	0	0	0	0	0	0	0	0	0	0	0	0
Firmicutes	Clostridia	Peptostreptococcales_Tissierellales	Peptostreptococcaceae	Proteocatella	unclassified_Proteocatella	0.000157862	0	4.02242e-05	0.000719	0.000143147	0.000198562	0	0	0	0	0	0	1.3579e-05	0	0	0	6.78896e-05	0	0	0	0	0	0	0	0	0	0	0	0	0	0	0	0	0	0	0
Firmicutes	Clostridia	Peptostreptococcales_Tissierellales	Peptostreptococcaceae	Romboutsia	Romboutsia_sp._DR1	0	0	0	0	0	0	0	0	0	0	0	0	0	0.000423852	0	0	6.78896e-05	0	0	0	0	0	0	0	0	0	0	0	0	0	0	0	0	0	0	0
Firmicutes	Clostridia	Peptostreptococcales_Tissierellales	Peptostreptococcaceae	Romboutsia	unclassified_Romboutsia	0.0178778	0.0427707	0.0838004	0.0705262	0.247866	0.316111	0.475197	0.180574	0.22197	0.112763	0.0901743	0.0867289	0.0973073	0.242987	0.176345	0.352986	0.22796	0.0603001	0.00364256	0.00107049	0.00137931	0.00154799	0.00441432	0.00117306	0.00217211	0.00648166	0.00383816	0.00165144	0.00220578	0.000649015	0.00396544	0.00383147	0.00186684	0.00326515	0.00154339	0.00258625
Firmicutes	Clostridia	Peptostreptococcales_Tissierellales	Peptostreptococcaceae	Sporacetigenium	unclassified_Sporacetigenium	0	0	0	0	0	0	0	0	0	0	0	0	0	3.97362e-05	0	0	0	0	0	0	0	0	0	0	0	0	0	0	0	0	0	0	0	0	0	0
Firmicutes	Clostridia	Peptostreptococcales_Tissierellales	Peptostreptococcaceae	Terrisporobacter	unclassified_Terrisporobacter	0.0299937	0.111986	0.148052	0.0500603	0.0843527	0.0931655	0.117839	0.154227	0.231749	0.097276	0.0723778	0.03904	0.0492511	0.170044	0.173286	0.255959	0.156092	0.0491247	0.0224528	0.0063217	0.00448639	0.00588527	0.0164831	0.00443656	0.00449506	0.00970789	0.0355175	0.0104389	0.0296055	0.00877646	0.0405083	0.011421	0.00574637	0.0135079	0.0133173	0.00120994
Firmicutes	Clostridia	Peptostreptococcales_Tissierellales	Peptostreptococcaceae	unclassified_Peptostreptococcaceae	unclassified_Peptostreptococcaceae	0.00159177	0	6.70403e-05	0.000128393	2.60268e-05	0.000436837	0.000443155	4.00416e-05	0.000238493	0.00138671	0.000168381	0.000155201	0.000787583	6.62269e-05	0.000206703	6.86182e-05	0.000149357	0.000157957	0.000247694	0.000795637	0	2.92073e-05	0.000356713	0	0.000558111	4.3795e-05	0.000363462	0.000484826	0.0011254	0.000649015	0.000159196	0.0013212	0.000306279	0.000104365	0.000396872	0
Firmicutes	Clostridia	Peptostreptococcales_Tissierellales	unclassified_Peptostreptococcales_Tissierellales	unclassified_Peptostreptococcales_Tissierellales	unclassified_Peptostreptococcales_Tissierellales	0	0	0	0	0	0	0	0	0	2.74597e-05	0	0	0	0	0	0	0	0	0	0	0	0	0	3.00784e-05	0	0	0	0	0	0	2.89448e-05	0	0	0	0	0
Firmicutes	Clostridia	unclassified_Clostridia	unclassified_Clostridia	unclassified_Clostridia	unclassified_Clostridia	0.000157862	0	0	3.85178e-05	0	0	2.68579e-05	0	0	0.000398166	0	0	0	6.62269e-05	0.000316944	0	0.000176513	0	0.000641091	0.000940298	0.00442831	0.00454174	0.00173898	0.00357932	0.0012369	0.000759113	0.00145385	0.00101511	0.00135048	0.00084077	0.000810455	0.000543159	0.00169183	0.0019084	0.000881938	0.00319122
Firmicutes	Clostridia	unclassified_Clostridia	uncultured_rumen_bacterium_4C0d_17	unclassified_Clostridia	unclassified_Clostridia	0	0	0	0	0	0	0	0	0	0	0	0	0	0	0	0	0	0	0	0	0	0	0	3.00784e-05	0	0	8.72309e-05	0	1.50053e-05	0	2.89448e-05	0	4.37541e-05	0.000119275	1.4699e-05	0
Firmicutes	Negativicutes	Acidaminococcales	Acidaminococcaceae	Acidaminococcus	Acidaminococcus_fermentans	0.00210482	0	0	0	0	0	0	0	0	0	0	0	2.7158e-05	0	0	0	0	0	0.00509959	4.33984e-05	4.35572e-05	0	0.00117418	0	0.0114639	0.00629188	0.00029077	0.0124237	0.00022508	0	0.00153408	0.000322959	2.91694e-05	0.00104365	0.00110242	0
Firmicutes	Negativicutes	Acidaminococcales	Acidaminococcaceae	Acidaminococcus	Acidaminococcus_sp._Marseille_P2828	0	0	0	0	0	0	0	0	0	0	0	0	0	0	0	0	0	0	0	0	0	0	0	0	0.000693868	0	2.9077e-05	0.00036362	0	0	0	0	0	0	0	0
Firmicutes	Negativicutes	Acidaminococcales	Acidaminococcaceae	Acidaminococcus	unclassified_Acidaminococcus	0.000841928	0	0	0	0	0	0	0	0	0	0	0	0	0	0	0	0	0	0.000990777	0	0	0	0	0	0.00374086	0.00109487	0	4.54525e-05	0	0	0	0	0	4.47281e-05	2.93979e-05	0
Firmicutes	Negativicutes	Acidaminococcales	Acidaminococcaceae	Phascolarctobacterium	Phascolarctobacterium_succinatutens	0	0	0	0	0	0	0	0	0	0	0	0	0	0	0	0	0	0	0	0	0	0	2.97261e-05	0	4.52523e-05	0	0	0	3.00107e-05	0	0	0	0	0	0	0
Firmicutes	Negativicutes	Acidaminococcales	Acidaminococcaceae	Phascolarctobacterium	unclassified_Phascolarctobacterium	0.0339008	0.00120987	0.00111287	0	0	0.0009531	2.68579e-05	0	0	0.00115331	0	0	0	0	0.000192923	8.23418e-05	0	2.63262e-05	0.0497137	0.00630723	0.0054882	0.00646942	0.0221608	0.00523363	0.012384	0.038306	0.0600875	0.0150145	0.0178413	0.00678516	0.0124752	0.0124633	0.00828411	0.00904998	0.015772	0.00347858
Firmicutes	Negativicutes	Acidaminococcales	Acidaminococcaceae	Phascolarctobacterium	uncultured_Veillonellaceae_bacterium	0.00810356	0.00591637	0.00195758	0	5.20535e-05	0.00238275	0	0	0	0	0	0	0.000190106	0.000119208	0	0	0.000149357	0	0.0142643	0.0186468	0.01449	0.0230592	0.0226661	0.0132345	0.00591296	0.0216785	0.0187256	0.0232565	0.030911	0.0376724	0.0358192	0.0346301	0.027988	0.032398	0.0253263	0.0134303
Firmicutes	Negativicutes	Acidaminococcales	Acidaminococcaceae	Succiniclasticum	unclassified_Succiniclasticum	2.63103e-05	0	0	5.13571e-05	0	0	0	0	0	0	0	0	0	0	0	0	0	0	0	0	0	0	0	0	3.01682e-05	0	0	0	0	0	0	0	0	0	0	0
Firmicutes	Negativicutes	Acidaminococcales	Acidaminococcaceae	Succiniclasticum	uncultured_rumen_bacterium_4C28d_16	0	2.65904e-05	0	0	0	5.295e-05	0	0	0	0.000178488	0	0	0	0	2.75604e-05	0	2.71558e-05	0	0	0	0	0	1.4863e-05	0	0.00131232	0	0	0	0	0	0	0	0	0	0	0
Firmicutes	Negativicutes	Acidaminococcales	Acidaminococcaceae	unclassified_Acidaminococcaceae	unclassified_Acidaminococcaceae	0	0	0	0	0	0	0	0	0	0	0	0	0	0	0	0	0	0	0	0	0	0	0	0	0	0	0	0	0	0	0	0	0	0	0	0
Firmicutes	Negativicutes	Veillonellales_Selenomonadales	Selenomonadaceae	Anaerovibrio	Anaerovibrio_sp._765	0.000249947	2.65904e-05	0	0	0	1.32375e-05	0	0	0	0	0	0	0	0	0	0	0	0	0.00664403	0.00026039	0	0.000365091	0.00389412	0	0.00585263	0.00494883	0.0029077	0.00484826	0.00115541	0.000250756	0.0012591	0.00394891	0.00169183	0.000521827	0.00270461	0.000181491
Firmicutes	Negativicutes	Veillonellales_Selenomonadales	Selenomonadaceae	Anaerovibrio	unclassified_Anaerovibrio	0.00110503	0	0.000187713	0	0	0	0	1.33472e-05	0	0	0	0	0	0	0	0	0	0	0.0023021	0.00127302	0.00338294	0.00313979	0.00191733	0.0054893	0.0019006	0.00636487	0.00305308	0.00154538	0.00267095	0.00467586	0.00628103	0.0128156	0.0147743	0.00162512	0.00942204	0.000544473
Firmicutes	Negativicutes	Veillonellales_Selenomonadales	Selenomonadaceae	Anaerovibrio	uncultured_Anaerovibrio_sp.	0	0	0	0	0	0	0	0	0	0	0	0	0	0	0	0	0	0	0	0	0	2.92073e-05	0	0	0	7.29916e-05	0	3.03017e-05	0	0	2.89448e-05	0	0	0	0.000132291	0
Firmicutes	Negativicutes	Veillonellales_Selenomonadales	Selenomonadaceae	Mitsuokella	unclassified_Mitsuokella	0.00564355	0	2.68161e-05	0	0	0	6.71447e-05	0	0	0	0	0	0.000190106	6.62269e-05	0	0	0	0	0.00611951	0	0	0	0.00120391	0	0.00487216	0.000832105	0	0.000863597	0	0	0.000665731	0.00243688	1.45847e-05	4.47281e-05	0.00042627	0
Firmicutes	Negativicutes	Veillonellales_Selenomonadales	Selenomonadaceae	Quinella	unclassified_Quinella	0	0	0	0	0	2.6475e-05	0	0	0	4.11896e-05	0	0	0	0	0	6.86182e-05	0	0	0	0	0	0	0	0	0	0	0	0	0	0	0	0	0.000262525	0	0	0
Firmicutes	Negativicutes	Veillonellales_Selenomonadales	Selenomonadaceae	Schwartzia	unclassified_Schwartzia	0	0	8.04484e-05	0	0	0	0	0	0	2.74597e-05	0	0	0	0	0	0	0	0	0	0.000564179	2.90381e-05	0.000306677	0	0	6.03364e-05	2.91967e-05	7.26924e-05	0	0	0	0	0	0	0	0	0.000166367
Firmicutes	Negativicutes	Veillonellales_Selenomonadales	Selenomonadaceae	Schwartzia	uncultured_Schwartzia_sp.	0	2.65904e-05	0	0	0	0.000503025	0	0	0	0	0	0	0	0	0	0	0	0	0	0	0.00180036	0.000423506	0	0.000977547	0	0	0	0	0	0	8.68345e-05	0	5.83388e-05	0.000193822	0	0
Firmicutes	Negativicutes	Veillonellales_Selenomonadales	Selenomonadaceae	Selenomonas	Selenomonas_bovis	0	0	0	0	0	0	0	0	0	0	0	0	0	0	0	0	0	0	0	0	0	0	0	0	0	2.91967e-05	0	0	0	0	0	0	0	0	0	0
Firmicutes	Negativicutes	Veillonellales_Selenomonadales	Selenomonadaceae	Selenomonas	unclassified_Selenomonas	0.00110503	0	0	0	0	0	1.34289e-05	0	0	0	0	0	0	0	0	0	0	0	0.00374455	0	0	0	8.91782e-05	0	0.00381628	0.00440869	0.000261693	0.00396952	0.000105037	0	0.0015196	0.00020552	0	0.000164003	0.000543862	0
Firmicutes	Negativicutes	Veillonellales_Selenomonadales	Selenomonadaceae	Selenomonas	uncultured_rumen_bacterium_3C3d_9	0	0	0	0	0	0	0	0	0	0	0	0	0	0	0	0	0	0	0	0	0	0	0	0	0	0	0	0.00072724	0	0	0	0	0	0	0	0
Firmicutes	Negativicutes	Veillonellales_Selenomonadales	Selenomonadaceae	unclassified_Selenomonadaceae	Veillonellaceae_bacterium_DJF_CR19	0.00169701	0	0	0	0	0	0	0	0	0	0	0	0	0	0	0	0	0	0.00222925	0	0	0	0	0	0	0	0	0.000772692	0	0	0	0	0	0	0	0
Firmicutes	Negativicutes	Veillonellales_Selenomonadales	Selenomonadaceae	unclassified_Selenomonadaceae	swine_fecal_bacterium_SD_Cel5	0	0	0	0	0	0	0	0	0	0	0	0	0	0	0	0	0	0	0	0	0	0	0	0	0	0	0.000218077	0	0	0	0	0	0	0	0	0
Firmicutes	Negativicutes	Veillonellales_Selenomonadales	Selenomonadaceae	unclassified_Selenomonadaceae	unclassified_Selenomonadaceae	0.00702484	2.65904e-05	0	0	2.60268e-05	2.6475e-05	0	0	2.64992e-05	4.11896e-05	0	0	0	0	0	0	0	1.31631e-05	0.0112337	0.00137428	5.80762e-05	0	0.00358199	0.000150392	0.00280564	0.00153282	0	0.00940866	4.5016e-05	0	0.000680203	4.40399e-05	5.83388e-05	0.000566555	0.000102893	0
Firmicutes	Negativicutes	Veillonellales_Selenomonadales	Selenomonadaceae	unclassified_Selenomonadaceae	unclassified_Selenomonadaceae_bacterium_YE56	0	0	0	2.56786e-05	0	0	0	0	0	0	0	0	0	0	0	0	0	0	0	0	0	0	0	0	0	0	0	0	0	0	0	0	0	0	0	0
Firmicutes	Negativicutes	Veillonellales_Selenomonadales	Selenomonadaceae	unclassified_Selenomonadaceae	uncultured_rumen_bacterium	0	0	0	0	0	0	0	0	0	0	0	0	0	0	0	0	0	0	0	0.000752239	0	0	0	0	0	0	0	0	0	0	0	0	0	0	0	0
Firmicutes	Negativicutes	Veillonellales_Selenomonadales	Veillonellaceae	Allisonella	unclassified_Allisonella	0.00278889	0	0	0	0	0	0	0	0	0	0	0	0	0	0	0	0	0	0.00316174	0	0	0	8.91782e-05	0	0.000573196	0.00110947	0.000232616	0.000530279	0.000420149	0	0.000159196	0.0012478	0	1.49094e-05	0.000176388	0
Firmicutes	Negativicutes	Veillonellales_Selenomonadales	Veillonellaceae	Dialister	Bacteroides_xylanisolvens	2.63103e-05	0	0	0	0	0	0	0	0	0	0	0	0	0	0	0	0	0	5.8281e-05	0	0	0	2.97261e-05	0	0.00033185	2.91967e-05	0	0	0	0	0	0	0	0	0	0
Firmicutes	Negativicutes	Veillonellales_Selenomonadales	Veillonellaceae	Dialister	Dialister_succinatiphilus	0	0	0	0	0	0	0	0	0	0	0	0	0	9.27177e-05	0	0	0	0	0	0	0	0	0	0	0	0	0	0	0	0	0	0	2.91694e-05	0	0	0
Firmicutes	Negativicutes	Veillonellales_Selenomonadales	Veillonellaceae	Dialister	unclassified_Dialister	0.0375579	5.31809e-05	1.34081e-05	6.41964e-05	2.60268e-05	2.6475e-05	5.37158e-05	1.33472e-05	0	0.00421506	0	0	0.000461687	0	0.000110241	0	0.000244403	0	0.0511853	0	0	0	0.000787741	0	0.0462478	0.0108174	0.000785078	0.00359075	0	0	0.000347338	0.000704639	0	0	0.000161689	1.51242e-05
Firmicutes	Negativicutes	Veillonellales_Selenomonadales	Veillonellaceae	Megasphaera	Megasphaera_elsdenii	0.0415307	0	0.000160897	8.98749e-05	5.20535e-05	0.000330937	0.000120861	0	0	0.00400912	0	0	9.50532e-05	0.00017219	0	0	0	3.94893e-05	0.0199467	0.000332721	0.000362976	1.46037e-05	0.00483049	0	0.0798703	0.0232843	0.00600439	0.0202718	0.000720256	0.00126853	0.00703359	0.013946	0.000437541	0.000730558	0.00122001	0
Firmicutes	Negativicutes	Veillonellales_Selenomonadales	Veillonellaceae	Megasphaera	Megasphaera_hexanoica	0	0	0	0	0	0	0	0	0	0	0	0	0	0	0	0	0	0	0	0	0	0	0	0	0.000105589	0	0	0	0	0	0	0	0	0	0	0
Firmicutes	Negativicutes	Veillonellales_Selenomonadales	Veillonellaceae	Megasphaera	unclassified_Megasphaera	0.00811671	0	0	0	0	0	0	0	0	0.00111212	0	0	0	0	0.000110241	0	5.43117e-05	0	0.00507045	0	0	0	0.00153089	0	0.0250094	0.0121166	0.00257331	0.00690878	0.000615218	0	0.00169327	0.00236348	0	0.000402552	0.000720249	0
Firmicutes	Negativicutes	Veillonellales_Selenomonadales	Veillonellaceae	Negativicoccus	Negativicoccus_massiliensis	0	0	0	2.56786e-05	0	0	0	0	0	0	0	0	1.3579e-05	0	0	0	0	0	0	0	0	0	0	0	0	0	0	0	0	0	0	0	0	0	0	0
Firmicutes	Negativicutes	Veillonellales_Selenomonadales	Veillonellaceae	Veillonella	Veillonella_bacterium_RA2114	0	0	0	0	0	0	0	0	0	0	0	0.000973531	0	0	0	0	0	0	0	0	0	0	0	0	0	0	0	0	0	0	0	0	0	0	0	0
Firmicutes	Negativicutes	Veillonellales_Selenomonadales	Veillonellaceae	Veillonella	Veillonella_caviae	0.000841928	0	0.000107264	0.000667642	0	0.00107224	6.71447e-05	0	0	0.000659033	0	0	0.000298739	0	4.13405e-05	0	0	0	0	0	0	0	0	0	0	0	7.26924e-05	0	0	0.00042776	1.44724e-05	0	0	0	0	0
Firmicutes	Negativicutes	Veillonellales_Selenomonadales	Veillonellaceae	Veillonella	Veillonella_magna	0	0	6.70403e-05	0	0.000260268	0	0	0	0	0	0	0	0	0	0	0	0	0	0	0	0	0	0	0	0	0	0	0	0	0	0	0	0	0	0	0
Firmicutes	Negativicutes	Veillonellales_Selenomonadales	Veillonellaceae	Veillonella	Veillonella_sp._R_32	0	0	0	0	0	0	0	0	0	0	0	0	0	0	0	0	0	0	0	0	0	0	0	0	0	0	0	0	0	0	0	0	0	0	0	0
Firmicutes	Negativicutes	Veillonellales_Selenomonadales	Veillonellaceae	Veillonella	Veillonella_sp._S101	0	0	0	0	0	0	0	0	0	0	0	0	0	0	0	0	0	0	0	0	0	0	0	3.00784e-05	0	0	0	0	0	0	0	0	0	0	0	0
Firmicutes	Negativicutes	Veillonellales_Selenomonadales	Veillonellaceae	Veillonella	unclassified_Veillonella	7.89308e-05	0.000518514	0.000120673	0.000962946	0	0.000132375	2.68579e-05	0	0	0.000398166	0.000116571	0	0	2.64908e-05	0	0	0.000190091	2.63262e-05	0	0	0	0	0	0	0	0	0	0	0	0	0	0	0	0	0	0
Firmicutes	Negativicutes	Veillonellales_Selenomonadales	Veillonellaceae	unclassified_Veillonellaceae	unclassified_Veillonellaceae	0	0	0	0	0	0	0	0	0	2.74597e-05	0	0	0	0	0	0	0	0	0	0	0	0	0	0	3.01682e-05	0	0	0	0	0	0	0	2.91694e-05	0	0	0
Firmicutes	Negativicutes	unclassified_Negativicutes	unclassified_Negativicutes	unclassified_Negativicutes	unclassified_Negativicutes	0	0	0	0	0	0	0	0	0	0	0	0	0	0	0	0	0	0	0	0	0	0	0	0	0	0	0	0	0	0	0	2.936e-05	0	0	0	0
Firmicutes	Symbiobacteriia	Symbiobacteriales	Symbiobacteraceae	Symbiobacterium	Symbiobacterium_thermophilum	0	0	0	0	0	7.9425e-05	0	0	0	0	0	0	0	0	0	0	0	0	0	0	0	0	0	0	0	0	0	0	0	0	0	0	0	0	0	0
Firmicutes	Symbiobacteriia	Symbiobacteriales	Symbiobacteraceae	Symbiobacterium	uncultured_compost_bacterium	0	0	0	0	0	0	0	0	0	2.74597e-05	0	0	0	0	0	0	0	0	0	0	0	0	0	0	0	0	0	0	0	0	0	0	0	0	0	0
Firmicutes	Syntrophomonadia	Syntrophomonadales	Syntrophomonadaceae	unclassified_Syntrophomonadaceae	unclassified_Syntrophomonadaceae	0	0	0	0	0	0	0	0	0	0	0	0	0	0	0	0	0	0	0	0	0	0	0	0	0	0	0	0	3.00107e-05	0	0	0	0	2.98187e-05	0	9.07455e-05
Firmicutes	unclassified_Firmicutes	unclassified_Firmicutes	unclassified_Firmicutes	unclassified_Firmicutes	unclassified_Firmicutes	0	0	0	0	0	0	0	0	0	2.74597e-05	0	0	0	0	0	0	0	0	0.000203984	0	8.71143e-05	2.92073e-05	0.000104041	7.51959e-05	6.03364e-05	0.00026277	4.36154e-05	0.000242413	3.00107e-05	2.95007e-05	0.000202614	5.87199e-05	0.000204186	4.47281e-05	0	3.02485e-05
Fusobacteriota	Fusobacteriia	Fusobacteriales	Fusobacteriaceae	Cetobacterium	unclassified_Cetobacterium	0	0	0	0	0	0	0	0	0	0	0	0	0	0	0	0	2.71558e-05	0	0	0	0	0	0	1.50392e-05	0	0	0	0	0	1.47504e-05	4.34172e-05	7.33999e-05	0	0	7.34948e-05	0
Fusobacteriota	Fusobacteriia	Fusobacteriales	Fusobacteriaceae	Fusobacterium	Fusobacterium_gastrosuis	0.00305199	0.00119657	0	0	0	0.000238275	0.000174576	0	0	0	0	0	8.14741e-05	6.62269e-05	0	0	0	0	0	0	0	0	0	0	0	0	0	0	0	0	0	0	0	2.98187e-05	0	0
Fusobacteriota	Fusobacteriia	Fusobacteriales	Fusobacteriaceae	Fusobacterium	Fusobacterium_mortiferum	0	0	0	0	0	0	0	0	0	0	0	0	0	0	0	0	0	0	0	0	0	0	0	0	0	0	7.26924e-05	0	0	0	0	0	0	0	0	0
Fusobacteriota	Fusobacteriia	Fusobacteriales	Fusobacteriaceae	Fusobacterium	Fusobacterium_necrophorum	3.94654e-05	0.000132952	0	0.0236628	0	5.295e-05	0	0	0	0	5.18094e-05	0	0	0	0	0	0	3.94893e-05	0	0	0	0	0	0	0	0	0	0	0	0	0	0	0	0	0	0
Fusobacteriota	Fusobacteriia	Fusobacteriales	Fusobacteriaceae	Fusobacterium	unclassified_Fusobacterium	0.00113134	0	0.000187713	0.000282464	0.000208214	0.000728062	0	0	0	0.000178488	0	0	0	0	0	0.000178407	0.000108623	0	0.000160273	0	0	0	0	0	0	2.91967e-05	0	0	0	7.37518e-05	0	0	0	0	0	0
Gemmatimonadota	Gemmatimonadetes	Gemmatimonadales	Gemmatimonadaceae	Gemmatimonas	unclassified_Gemmatimonas	0	0	0	0	0	0	0	0	0	0	0	0	0	0	0	0	0	0	0	0	0	0	0	0	0	0	0	0	0	0	0	0	0	0	0	0
Gemmatimonadota	Gemmatimonadetes	Gemmatimonadales	Gemmatimonadaceae	unclassified_Gemmatimonadaceae	unclassified_Gemmatimonadaceae	2.63103e-05	0.000119657	5.36322e-05	6.41964e-05	3.90401e-05	0	4.02868e-05	0	0	0	0	0	0	0	0	0	2.71558e-05	0	0	0	0	0	0	0	0	0	0	0	0	0	0	0	0	0	0	0
Gemmatimonadota	Gemmatimonadetes	Gemmatimonadales	Gemmatimonadaceae	unclassified_Gemmatimonadaceae	uncultured_Gemmatimonadales_bacterium	0	0	0	0	0	0	0	0	0	0	0	0	0	0	0	0	0	0	0	0	0	0	0	0	0	0	0	0	0	0	0	0	0	0	0	0
Hydrogenedentes	Hydrogenedentia	Hydrogenedentiales	Hydrogenedensaceae	unclassified_Hydrogenedensaceae	unclassified_Hydrogenedensaceae	0	0	0	0	0	0	0	0	0	0	0	0	0	0	0	0	0	0	0	0	0	0	0	0	0	0	0	0	0	0	0	0	0	0	0	0
Methylomirabilota	Methylomirabilia	Rokubacteriales	unclassified_Rokubacteriales	unclassified_Rokubacteriales	unclassified_Rokubacteriales	0	0	0	0	0	0	0	0	0	0	0	0	0	0	0	0	0	0	0	0	0	0	0	0	0	0	0	0	0	0	0	0	0	0	0	0
Methylomirabilota	Methylomirabilia	Rokubacteriales	uncultured_Candidatus_Rokubactera_bacterium	uncultured_Candidatus_Rokubactera_bacterium	uncultured_Candidatus_Rokubactera_bacterium	0	0	0	0	0	0	0	0	0	0	2.59047e-05	0	0	0	0	0	0	0	0	0	0	0	0	0	0	0	0	0	0	0	0	0	0	0	0	0
Methylomirabilota	Methylomirabilia	Rokubacteriales	uncultured_Firmicutes_bacterium	uncultured_Firmicutes_bacterium	uncultured_Firmicutes_bacterium	0	0	0	2.56786e-05	0	0	0	0	0	0	0	0	0	0	0	0	0	0	0	0	0	0	0	0	0	0	0	0	0	0	0	0	0	0	0	0
Methylomirabilota	Methylomirabilia	Rokubacteriales	uncultured_actinobacterium	uncultured_actinobacterium	uncultured_actinobacterium	0	0	0	0	0	0	0	0	0	0	0	0	0	0	0	0	0	0	0	0	0	0	0	0	0	0	0	0	0	0	0	0	0	0	0	0
Myxococcota	Myxococcia	Myxococcales	Anaeromyxobacteraceae	Anaeromyxobacter	unclassified_Anaeromyxobacter	0	0	0	0	0	0	0	0	0	0	0	0	0	0	0	0	0	0	0	0	0	0	0	0	0	0	0	0	0	0	0	0	0	0	0	0
Myxococcota	Myxococcia	Myxococcales	Myxococcaceae	P3OB_42	unclassified_P3OB_42	0	0	0	0	0	0	0	0	0	2.74597e-05	0	0	0	0	0	0	0	0	0	0	0	0	0	0	0	0	0	0	0	0	0	0	0	0	0	0
Myxococcota	Myxococcia	Myxococcales	Myxococcaceae	unclassified_Myxococcaceae	unclassified_Myxococcaceae	0	0	0	0	0	2.6475e-05	0	0	0	0	0	0	0	0	0	0	0	0	0	0	0	0	0	0	0	0	0	0	0	0	0	0	0	0	0	0
Myxococcota	Polyangia	Haliangiales	Haliangiaceae	Haliangium	unclassified_Haliangium	0	0	0	0	0	0	0	0	0	0	0	0	0	0	0	0	0	0	0	0	0	0	0	0	0	0	0	0	0	0	0	0	0	0	0	0
Myxococcota	Polyangia	Haliangiales	Haliangiaceae	Haliangium	uncultured_Myxococcales_bacterium	0	0	0	0	0	0	0	0	0	5.49194e-05	0	0	0	0	0	0	0	0	0	0	0	0	0	0	0	0	0	0	0	0	0	0	0	0	0	0
Myxococcota	Polyangia	Haliangiales	Haliangiaceae	Haliangium	uncultured_prokaryote	0	0	0	0	0	0	0	0	0	0	0	0	0	0	0	0	0	0	0	0	0	0	0	0	0	0	0	0	0	0	0	0	0	0	0	0
Myxococcota	Polyangia	Nannocystales	Nannocystaceae	Nannocystis	unclassified_Nannocystis	0	0	0	0	0	0	0	0	0	0	0	0	0	0	4.13405e-05	0	0	0	0	0	0	0	0	0	0	0	0	0	0	0	0	0	0	0	0	0
Myxococcota	Polyangia	Nannocystales	Nannocystaceae	Nannocystis	uncultured_Nannocystaceae_bacterium	0	0	0	0	0	0	0	0	0	4.11896e-05	0	0	0	0	0	0	0	0	0	0	0	0	0	0	0	0	0	0	0	0	0	0	0	0	0	0
Myxococcota	Polyangia	Polyangiales	Polyangiaceae	Pajaroellobacter	Sorangiineae_bacterium_706	0	0	0	0	0	0	0	0	0	2.74597e-05	0	0	0	0	0	0	0	0	0	0	0	0	0	0	0	0	0	0	0	0	0	0	0	0	0	0
Myxococcota	Polyangia	Polyangiales	Polyangiaceae	Polyangium	unclassified_Polyangium	0	0	0	0	0	0	0	0	0	8.23791e-05	0	0	0	0	0	0	0	0	0	0	0	0	0	0	0	0	0	0	0	0	0	0	0	0	0	0
Myxococcota	Polyangia	Polyangiales	Polyangiaceae	Sorangium	Sorangium_cellulosum	0	0	0	0	0	0	0	0	0	8.23791e-05	0	0	0	0	0	0	0	0	0	0	0	0	0	0	0	0	0	0	0	0	0	0	0	0	0	0
Myxococcota	Polyangia	Polyangiales	Sandaracinaceae	unclassified_Sandaracinaceae	uncultured_Polyangiaceae_bacterium	0	0	0	0	0	0	0	0	0	0	0	0	0	0	0	0	0	0	0	0	0	0	0	0	0	0	0	0	0	0	0	0	0	0	0	0
Myxococcota	Polyangia	mle1_27	uncultured_proteobacterium	uncultured_proteobacterium	uncultured_proteobacterium	0	0	0	0	0	0	0	0	0	0	0	0	0	0	0	0	0	0	0	0	0	0	0	0	0	0	0	0	0	0	0	0	0	0	0	0
Nitrospirota	Nitrospiria	Nitrospirales	Nitrospiraceae	Nitrospira	unclassified_Nitrospira	0	0	0	0	0	0	0	0	0	0	0	0	0	0	0	0	0	0	0	0	0	0	0	0	0	0	0	0	0	0	0	0	0	0	0	0
Nitrospirota	Nitrospiria	Nitrospirales	Nitrospiraceae	Nitrospira	uncultured_soil_bacterium	0	0	0	0	0	0	0	0	0	0	0	0	0	0	0	0	0	0	0	0	0	0	0	0	0	0	0	0	0	1.47504e-05	1.44724e-05	0	0	0	0	0
Nitrospirota	Thermodesulfovibrionia	unclassified_Thermodesulfovibrionia	unclassified_Thermodesulfovibrionia	unclassified_Thermodesulfovibrionia	unclassified_Thermodesulfovibrionia	0	0	0	0	3.90401e-05	0	0	0	0	0	0	0	0	0	0	0	0	0	0	0	0	0	0	0	0	0	0	0	0	0	0	0	0	0	0	0
Nitrospirota	Thermodesulfovibrionia	unclassified_Thermodesulfovibrionia	uncultured_Sphingobacteriales_bacterium	unclassified_Thermodesulfovibrionia	unclassified_Thermodesulfovibrionia	0	0	0	0	0	0	0	0	0	0	0	0	0	0	0	0	0	0	0	0	0	0	0	0	0	0	0	0	0	0	0	0	0	0	0	0
Patescibacteria	Gracilibacteria	Absconditabacteriales__SR1	SR1_bacterium_canine_oral_taxon_369	unclassified_SR1_bacterium_canine_oral_taxon_369	unclassified_SR1_bacterium_canine_oral_taxon_369	0.000249947	0	0	0	0	0	0	0	0	0	0	0	0	0	0	0	0	0	0	0	0	0	0	0	0	0	0	0	0	0	0	0	0	0	0	0
Patescibacteria	Parcubacteria	Candidatus_Moranbacteria	unclassified_Candidatus_Moranbacteria	unclassified_Candidatus_Moranbacteria	unclassified_Candidatus_Moranbacteria	0.000460429	0	0	0	0	0	0	0	0	0	0	0	0	0	0	0	0	0	0	0	0	0	0	0	0	0	0	0	0	0	0	0	0	0	0	0
Patescibacteria	Saccharimonadia	Saccharimonadales	LWQ8	unclassified_LWQ8	unclassified_LWQ8	0	0	0	0	0	0	0	2.66944e-05	0	0.000123569	3.88571e-05	0	0	0	0	0	0	0	0	0	0	0	0	0	0	0	0	0	0	0	0	0	0	0	0	0
Patescibacteria	Saccharimonadia	Saccharimonadales	Saccharimonadaceae	Candidatus_Saccharimonas	TM7_phylum_sp._canine_oral_taxon_251	0	0	0	0	0	0	0	0	0	0	0	0	0	0	0	0	0.000122201	0	0	0	0	0	0	0	0	0	0	0	0	0	0	0	0	0	0	0
Patescibacteria	Saccharimonadia	Saccharimonadales	Saccharimonadaceae	Candidatus_Saccharimonas	unclassified_Candidatus_Saccharimonas	0.000223637	0	0.000160897	0.000333821	0.000455468	0.00129727	0	0	0	0.00392674	0	0	0.000122211	0.000331135	0.00206703	0.000439156	0.00065174	0	0.000160273	0.000839035	0.000754991	0.000934634	0.000876919	0.0013836	0.000497775	0.00113867	0.000392539	0.00018181	0.00627223	0.00041301	0.00178011	0.000689959	0.000656312	0.00070074	0.000646754	0.00131581
Patescibacteria	Saccharimonadia	Saccharimonadales	Saccharimonadaceae	Candidatus_Saccharimonas	uncultured_rumen_bacterium	0	5.31809e-05	0	0	0	0.000569212	4.02868e-05	0	0	0.00380317	0	0	4.07371e-05	0.000278153	0.00483684	0.000192131	0.00180586	0	0	0.000173594	0.00015971	0	0	0.00018047	0	0.000102188	0	0	0	0	0	0	0.000131262	0	0	7.56212e-05
Patescibacteria	Saccharimonadia	Saccharimonadales	Saccharimonadaceae	TM7a	unclassified_TM7a	0	0	0	0	0	0	0	0	0	5.49194e-05	0	0	0	0	0	0	0	0	0	0	0	0	0	0	0	0	0	0	0	0	0	0	0	0	0	0
Patescibacteria	Saccharimonadia	Saccharimonadales	Saccharimonadaceae	TM7x	unclassified_TM7x	0.000263103	0	8.04484e-05	0.0011427	0.000546562	0	0	0	0	0	0.000103619	0	8.14741e-05	0	0	0.000576393	4.07338e-05	9.21416e-05	0	0	0	0	0	0	0	0	0	0	0	0	0	0	0	0	1.4699e-05	0
Patescibacteria	Saccharimonadia	Saccharimonadales	Saccharimonadaceae	unclassified_Saccharimonadaceae	unclassified_Saccharimonadaceae	0.000447274	0	0	0.000295303	0.000273281	0.000569212	0	0	0	0	0	0	0	0	5.51207e-05	0	0	0	0	0	0	0	0	0	0	0	0	0	0	1.47504e-05	0	0	0	0	0	0
Patescibacteria	Saccharimonadia	Saccharimonadales	YM_S32_TM7_50_20	unclassified_YM_S32_TM7_50_20	unclassified_YM_S32_TM7_50_20	0	0	0	0	0	0	0	0	0	0	0	0	0	0	0	0	0	0	0	0	0	0	0	0	0	0	0	0	0	0	0	0	0	0	0	0
Patescibacteria	Saccharimonadia	Saccharimonadales	unclassified_Saccharimonadales	unclassified_Saccharimonadales	unclassified_Saccharimonadales	0	5.31809e-05	4.02242e-05	0	0	0	0	0	0	5.49194e-05	0	0	0	2.64908e-05	6.89009e-05	0	0	0	0	0	0	2.92073e-05	0	0	1.50841e-05	0	0	1.51508e-05	4.5016e-05	0	0	0	0	0	0	0
Patescibacteria	Saccharimonadia	Saccharimonadales	uncultured_Candidatus_Saccharibacteria_bacterium	uncultured_Candidatus_Saccharibacteria_bacterium	uncultured_Candidatus_Saccharibacteria_bacterium	0.0041044	0.000159543	0.00101901	0.00403153	0.00210817	0.00128404	0.00588188	1.33472e-05	0	0.000370706	0.000466285	0.000126982	0.000298739	0.00279478	0.000165362	0.00175663	0.000176513	5.26524e-05	0	0	0	0	0	0	0	0	0	0	0	0	0	0	2.91694e-05	0	0	0
Patescibacteria	Saccharimonadia	Saccharimonadales	uncultured_soil_bacterium	uncultured_soil_bacterium	uncultured_soil_bacterium	0	2.65904e-05	0	0	0	0	0	0	0	0	0	0	0	0	0	0	0	0	0	0	0	0	0	0	0	0	0	0	0	0	0	0	0	0	0	0
Planctomycetota	Planctomycetes	Gemmatales	Gemmataceae	Gemmata	unclassified_Gemmata	0	0	0	0	3.90401e-05	0	0	0	0	0	0	0	0	0	0	0	0	0	0	0	0	0	0	0	0	0	0	0	0	0	0	0	0	0	0	0
Planctomycetota	Planctomycetes	Gemmatales	Gemmataceae	unclassified_Gemmataceae	unclassified_Gemmataceae	0	3.98857e-05	0	0	0	0	8.05737e-05	0	0	0	0	0	0	0	0	0	0	0	0	0	0	0	0	0	0	0	0	0	0	0	0	0	0	0	0	0
Planctomycetota	Planctomycetes	Isosphaerales	Isosphaeraceae	Aquisphaera	unclassified_Aquisphaera	0	0	0	0	0	0	0	0	0	0	0	0	0	0	0	0	0	0	0	0	0	0	0	0	0	0	0	0	0	0	0	0	0	0	0	0
Planctomycetota	Planctomycetes	Isosphaerales	Isosphaeraceae	Singulisphaera	unclassified_Singulisphaera	0	0	0	0	0	0	0	0	0	0	0	0	0	0	0	0	0	0	0	0	0	0	0	0	0	0	0	0	0	0	0	0	0	0	0	0
Planctomycetota	Planctomycetes	Pirellulales	Pirellulaceae	Blastopirellula	unclassified_Blastopirellula	0	0	0	0	0	0	0	0	0	0	0	0	0	0	0	0	0	0	0	0	0	0	0	0	0	0	0	0	0	0	0	0	0	0	0	0
Planctomycetota	Planctomycetes	Pirellulales	Pirellulaceae	p_1088_a5_gut_group	unclassified_p_1088_a5_gut_group	0	0	1.34081e-05	0	0	2.6475e-05	0	0	0	0	0	0	0	0	0	0	0	0	0	2.89323e-05	8.71143e-05	0	0	6.01567e-05	0	0	0	0	0	0	0	0	0	4.47281e-05	1.4699e-05	0
Planctomycetota	Planctomycetes	Pirellulales	Pirellulaceae	unclassified_Pirellulaceae	unclassified_Pirellulaceae	0	0	0	0	0	0	0	0	0	0	0	0	0	0	0	0	0	0	0	0	0	0	0	0	0	0	0	0	0	0	0	0	0	0	0	0
Planctomycetota	Planctomycetes	Pirellulales	Pirellulaceae	unclassified_Pirellulaceae	uncultured_Planctomyces_sp.	0	0	0	0	0	0	0	0	0	0	0	0	0	0	0	0	0	0	0	0	0	0	0	0	0	0	0	0	0	0	0	0	0	0	0	0
Planctomycetota	Planctomycetes	Planctomycetales	Rubinisphaeraceae	SH_PL14	uncultured_Planctomycetaceae_bacterium	0	0	0	0	0	0	0	0	0	0	0	0	0	0	0	0	0	0	0	0	0	0	0	0	0	0	0	0	0	0	0	0	0	0	0	0
Planctomycetota	Planctomycetes	unclassified_Planctomycetes	uncultured_planctomycete	unclassified_Planctomycetes	unclassified_Planctomycetes	0	0	0	0	0	0	0	0	0	0	0	0	0	0	0	0	2.71558e-05	0	0	0	0	0	0	0	0	0	0	0	0	0	0	0	0	0	0	0
Proteobacteria	Alphaproteobacteria	Acetobacterales	Acetobacteraceae	Acetobacter	unclassified_Acetobacter	0	0	0	0.000102714	0	0	0	0	0	0	0	0	0	0	0	0	0	0	0	0	0	0	0	0	0	0	0	0	0	0	0	0	0	0	0	0
Proteobacteria	Alphaproteobacteria	Acetobacterales	Acetobacteraceae	Roseomonas	Roseomonas_lacus	0	0	0	0	0	0	0	0	0	2.74597e-05	0	0	0	0	0	0	0	0	0	0	0	0	0	0	0	0	0	0	0	0	0	0	0	0	0	0
Proteobacteria	Alphaproteobacteria	Acetobacterales	Acetobacteraceae	unclassified_Acetobacteraceae	unclassified_Acetobacteraceae	0	0	0	0	5.20535e-05	0	0	0	0	0	0	0	0	0	0	0	0	0	0	0	0	0	0	0	0	0	0	0	0	0	0	0	0	0	0	0
Proteobacteria	Alphaproteobacteria	Caulobacterales	Caulobacteraceae	Brevundimonas	unclassified_Brevundimonas	0	3.98857e-05	0.000187713	0	0	2.6475e-05	0	0	0	0.000219678	0	0	0	0	0	0	0	0	0	0	0	0	0	0	0	0	0	0	0	0	0	0	0	0	0	0
Proteobacteria	Alphaproteobacteria	Caulobacterales	Caulobacteraceae	unclassified_Caulobacteraceae	unclassified_Caulobacteraceae	0	0	0	0	0	0	0	0	0	2.74597e-05	0	0	0	0	0	0	0	0	0	0	0	0	0	0	0	0	0	0	0	0	0	0	0	0	0	0
Proteobacteria	Alphaproteobacteria	Caulobacterales	Caulobacteraceae	unclassified_Caulobacteraceae	uncultured_Phenylobacterium_sp.	0	0	0	0	0	0	0	0	0	0	5.18094e-05	0	0	0	0	0	0	0	0	0	0	0	0	0	0	0	0	0	0	0	0	0	0	0	0	0
Proteobacteria	Alphaproteobacteria	Caulobacterales	Hyphomonadaceae	Hirschia	unclassified_Hirschia	0	0	0	0	0	0	0	0	0	0	0	0	0	0	0	0	0	0	0	0	0	0	0	0	0	0	0	0	0	0	0	0	0	0	0	0
Proteobacteria	Alphaproteobacteria	Caulobacterales	Hyphomonadaceae	SWB02	unclassified_SWB02	0	0	0	0	0	0	0	0	0	0	0	0	0	0	0	0	0	0	0	0	0	0	0	0	0	0	0	0	0	0	0	0	0	0	0	0
Proteobacteria	Alphaproteobacteria	Dongiales	Dongiaceae	Dongia	unclassified_Dongia	0	0	0	0	0	0	0	0	0	0	2.59047e-05	0	0	0	0	0	0	0	0	0	0	0	0	0	0	0	0	0	0	0	0	0	0	0	0	0
Proteobacteria	Alphaproteobacteria	Kiloniellales	Fodinicurvataceae	unclassified_Fodinicurvataceae	uncultured_compost_bacterium	0	0.000106362	0	0	0	0	0	0	0	0	0	0	0	0	0	0	0	0	0	0	0	0	0	0	0	0	0	0	0	0	0	0	0	0	0	0
Proteobacteria	Alphaproteobacteria	Kiloniellales	Kiloniellaceae	unclassified_Kiloniellaceae	Candidatus_Nitrosoarchaeum_limnia_SFB1	0	0	0	0	0	0	0	0	0	0	0	0	0	0	0	0	0	0	0	0	0	0	0	0	0	0	0	0	0	0	0	0	0	0	0	3.02485e-05
Proteobacteria	Alphaproteobacteria	Micropepsales	Micropepsaceae	unclassified_Micropepsaceae	unclassified_Micropepsaceae	0	0	0	0	0	0	0	2.66944e-05	0	0	0	0	0	0	0	0	0	0	0	0	0	0	0	0	0	0	0	0	0	0	0	0	0	0	0	0
Proteobacteria	Alphaproteobacteria	Paracaedibacterales	Paracaedibacteraceae	Candidatus_Paracaedibacter	unclassified_Candidatus_Paracaedibacter	0	0	0	0	0	0	0	0	0	0	0	0	0	0	0	0	0	0	0	0	0	0	0	0	0	0	0	0	0	0	0	0	0	0	0	0
Proteobacteria	Alphaproteobacteria	Paracaedibacterales	Paracaedibacteraceae	unclassified_Paracaedibacteraceae	unclassified_Paracaedibacteraceae	0	0	2.68161e-05	0	0	0	0	0	0	0	0	0	0	0	0	0	0	0	0	0	0.000333938	0.000949238	0	0.000120313	3.01682e-05	0.000102188	1.45385e-05	0	0	1.47504e-05	0	0	0	1.49094e-05	0	3.02485e-05
Proteobacteria	Alphaproteobacteria	Reyranellales	Reyranellaceae	Reyranella	unclassified_Reyranella	0	0	0	0	0	0	0	0	0	9.6109e-05	0	0	0	0	0	0	0	0	0	0	0	0	0	0	0	0	0	0	0	0	0	0	0	0	0	0
Proteobacteria	Alphaproteobacteria	Reyranellales	Reyranellaceae	unclassified_Reyranellaceae	unclassified_Reyranellaceae	0	0	0	0	0	0	0	0	0	0	0	0	0	0	2.75604e-05	0	0	0	0	0	0	0	0	0	0	0	0	0	0	0	0	0	0	0	0	0
Proteobacteria	Alphaproteobacteria	Rhizobiales	A0839	unclassified_A0839	unclassified_A0839	0	0	0	0	0	0	0	0	0	0	0	0	0	0	0	0	0	0	0	0	0	0	0	0	0	0	0	0	0	0	0	0	0	0	0	0
Proteobacteria	Alphaproteobacteria	Rhizobiales	Beijerinckiaceae	Bosea	unclassified_Bosea	0	0	0	7.70357e-05	0	0	0	0	0	0.000302057	0	0	0	0	0	0	0	0	0	0	0	0	0	0	0	0	0	0	0	0	0	0	0	0	0	0
Proteobacteria	Alphaproteobacteria	Rhizobiales	Beijerinckiaceae	Methylobacterium_Methylorubrum	unclassified_Methylobacterium_Methylorubrum	0	0	0	0	0	0	0	0	0	0	0	0	0	0	0	0	5.43117e-05	0	0	0	0	0	0	0	0	0	0	0	0	0	0	0	0	0	0	0
Proteobacteria	Alphaproteobacteria	Rhizobiales	Beijerinckiaceae	Microvirga	unclassified_Microvirga	0	0	0	0	0	0	0	0	0	0.000151028	2.59047e-05	0	0	0	0	0	0	2.63262e-05	0	0	0	0	0	0	0	0	0	0	0	0	0	0	0	0	0	0
Proteobacteria	Alphaproteobacteria	Rhizobiales	Beijerinckiaceae	unclassified_Beijerinckiaceae	unclassified_Beijerinckiaceae	0	0	0	0	0	0	0	0	0	0	0	0	0	0	0	0	0	0	0	0	0	0	0	0	0	0	0	0	0	0	0	0	0	0	0	0
Proteobacteria	Alphaproteobacteria	Rhizobiales	Devosiaceae	Devosia	unclassified_Devosia	7.89308e-05	0	0	0	0	0	0	0	0	0.000535464	0	0	0	0	0	0	0	0	0	0	0	0	0	0	0	4.3795e-05	0	0	0	0	0	0	0	0	0	0
Proteobacteria	Alphaproteobacteria	Rhizobiales	Devosiaceae	Pelagibacterium	unclassified_Pelagibacterium	0	0	0	0	0	0	0	0	0	0	0	0	0	0	0	0	0	0	0	0	0	0	0	0	0	0	0	3.03017e-05	0	0	0	0	0	0	0	0
Proteobacteria	Alphaproteobacteria	Rhizobiales	Hyphomicrobiaceae	Hyphomicrobium	unclassified_Hyphomicrobium	0	0	0	0	0	0	0	0	0	0.000123569	0	0	0	0	0	0	0	0	0	0	0	0	0	0	0	0	0	0	0	0	0	0	0	0	0	0
Proteobacteria	Alphaproteobacteria	Rhizobiales	Hyphomicrobiaceae	Pedomicrobium	unclassified_Pedomicrobium	0	0	0	0	0	0	0	0	0	0	0	0	0	0	2.75604e-05	0	0	0	0	0	0	0	0	0	0	0	0	0	0	0	0	0	0	0	0	0
Proteobacteria	Alphaproteobacteria	Rhizobiales	Kaistiaceae	Kaistia	unclassified_Kaistia	0	0	0	0	0	0	0	0	0	0.000109839	0	0	0	0	2.75604e-05	0	0	0	0	0	0	0	0	0	0	0	0	0	0	0	0	0	0	0	0	0
Proteobacteria	Alphaproteobacteria	Rhizobiales	Labraceae	Labrys	unclassified_Labrys	0	0	0	0	0	0	0	0	0	0	0	0	0	0	0	0	0	0	0	0	0	0	0	0	0	0	0	0	0	0	0	0	0	0	0	0
Proteobacteria	Alphaproteobacteria	Rhizobiales	Pleomorphomonadaceae	unclassified_Pleomorphomonadaceae	unclassified_Pleomorphomonadaceae	0	0	0	0	2.60268e-05	0	0	0	0	0	0	0	0	0	0	0	0	0	0	0	0	0	0	0	0	0	0	0	0	0	0	0	0	0	0	0
Proteobacteria	Alphaproteobacteria	Rhizobiales	Rhizobiaceae	Allorhizobium_Neorhizobium_Pararhizobium_Rhizobium	unclassified_Allorhizobium_Neorhizobium_Pararhizobium_Rhizobium	0.000223637	7.97713e-05	0	0	0	0	0	0	0	0.000164758	0	0	0	0	0	0	0	0	0	0	0	0	0	0	0	0	0	0	0	0	0	0	0	0	0	0
Proteobacteria	Alphaproteobacteria	Rhizobiales	Rhizobiaceae	Aminobacter	unclassified_Aminobacter	0	0	0	0	0	0	0	0	0	0.000247137	0	0	0	0	0	0	0	0	0	0	0	0	0	0	0	0	0	0	0	0	0	0	0	0	0	0
Proteobacteria	Alphaproteobacteria	Rhizobiales	Rhizobiaceae	Aureimonas	unclassified_Aureimonas	0	0	0	0	0	0	0	0	0	4.11896e-05	0	0	0	0	0	0	9.50454e-05	0	0	0	0	0	0	0	0	0	0	0	0	0	0	0	0	0	0	0
Proteobacteria	Alphaproteobacteria	Rhizobiales	Rhizobiaceae	Ochrobactrum	unclassified_Ochrobactrum	0.000144706	0.00321744	0.00054973	0	0	0	0	0	0	0	0	0	0	0	0	0	0	0	5.8281e-05	0	2.90381e-05	0	0	0	0	0	0	0	0	0	0	0	0	0	0	0
Proteobacteria	Alphaproteobacteria	Rhizobiales	Rhizobiaceae	Paenochrobactrum	unclassified_Paenochrobactrum	0.00105241	0	0	0	0	0	0	0	0	0	0	0	0	0	0	0	0	0	0	0	0	0	0	0	0	0	0	0	0	0	0	0	0	0	0	0
Proteobacteria	Alphaproteobacteria	Rhizobiales	Rhizobiaceae	Pseudochrobactrum	unclassified_Pseudochrobactrum	0.00152599	0.00143588	0.00272184	0	0	9.26625e-05	0	0	5.29984e-05	0	0	0	0	0	0.000165362	0	0	0	0.000495389	0	4.35572e-05	0	0	0	0	0	0	0	0	0	0	0	0	0	0	0
Proteobacteria	Alphaproteobacteria	Rhizobiales	Rhizobiaceae	Shinella	unclassified_Shinella	0	0	0	0.000282464	0	0	0	0	0	0	0	0	0	0	0	0	0	0	0	0	0	0	0	0	0	0	0	0	0	0	0	0	0	0	0	0
Proteobacteria	Alphaproteobacteria	Rhizobiales	Rhizobiaceae	unclassified_Rhizobiaceae	unclassified_Rhizobiaceae	0.00252578	0.00109021	0	0	6.50669e-05	0	0	0	0	0.000768872	3.88571e-05	0	0	6.62269e-05	6.89009e-05	0	0	0	0	0	0	0	0	0	0	0	0	0	0	0	0	0	0	0	0	0
Proteobacteria	Alphaproteobacteria	Rhizobiales	Xanthobacteraceae	Bradyrhizobium	unclassified_Bradyrhizobium	0	9.30665e-05	0	0	0	0	0	0	0	0	0	0	0	0	0	0	0	0	0	0	0	0	0	0	0	0	0	0	0	0	0	0	0	0	0	0
Proteobacteria	Alphaproteobacteria	Rhizobiales	Xanthobacteraceae	Pseudolabrys	unclassified_Pseudolabrys	0	0	0	0	0	0	0	0	0	9.6109e-05	0	0	0	1.32454e-05	0	0	0	0	0	0	0	0	0	0	0	0	0	0	0	0	0	0	0	0	0	0
Proteobacteria	Alphaproteobacteria	Rhizobiales	Xanthobacteraceae	unclassified_Xanthobacteraceae	unclassified_Xanthobacteraceae	0.000302568	0	0	0.000128393	2.60268e-05	0	0	0	0	0	0	0	0	0	6.89009e-05	0	0	0	0	0	0	0	0	0	0	0	0	0	0	0	0	0	0	0	0	0
Proteobacteria	Alphaproteobacteria	Rhizobiales	Xanthobacteraceae	unclassified_Xanthobacteraceae	uncultured_Bradyrhizobiaceae_bacterium	0	0	0	0	0	0	0	0	0	9.6109e-05	0	0	0	0	0	0	0	0	0	0	0	0	0	0	0	0	0	0	0	0	0	0	0	0	0	0
Proteobacteria	Alphaproteobacteria	Rhizobiales	unclassified_Rhizobiales	unclassified_Rhizobiales	unclassified_Rhizobiales	0	0	0	0	0	0	0	0	0	9.6109e-05	0	0	0	0	0	0	0	0	0	0	0	0	0	0	0	0	0	0	0	0	0	0	0	2.98187e-05	0	0
Proteobacteria	Alphaproteobacteria	Rhodobacterales	Rhodobacteraceae	Amaricoccus	unclassified_Amaricoccus	0	0	0	0	0	0	0	0	0	0.000192218	0	0	0	0	0.000151582	0	0	0	0	0	0	0	0	0	0	0	0	0	0	0	0	0	0	0	0	0
Proteobacteria	Alphaproteobacteria	Rhodobacterales	Rhodobacteraceae	Gemmobacter	unclassified_Gemmobacter	0.000184172	0	0	0	3.90401e-05	0	0	0	0	0	0	0	0	0	0	0	0	0	0	0	0	0	0	0	0	0	0	0	0	0	0	0	0	0	0	0
Proteobacteria	Alphaproteobacteria	Rhodobacterales	Rhodobacteraceae	Paracoccus	unclassified_Paracoccus	0.0125631	0.000199428	6.70403e-05	7.70357e-05	0	9.26625e-05	0	0	0	0.00166131	0	0	0	2.64908e-05	0	0	0	0	0.000262265	0	0	0	0	0	3.01682e-05	0	0	0	0	0	0	0	0	0	0	0
Proteobacteria	Alphaproteobacteria	Rhodobacterales	Rhodobacteraceae	Rhodobacter	unclassified_Rhodobacter	0	0	0	0	0	0	0	0	0	0	0	0	0	0	0	0	0	0	0	0	0	0	0	0	0	0	0	0	0	0	0	0	0	0	0	0
Proteobacteria	Alphaproteobacteria	Rhodobacterales	Rhodobacteraceae	Roseovarius	unclassified_Roseovarius	0	0	0	0	0	0	0	0	0	6.86493e-05	0	0	0	0	0	0	0	0	0	0	0	0	0	0	0	0	0	0	0	0	0	0	0	0	0	0
Proteobacteria	Alphaproteobacteria	Rhodobacterales	Rhodobacteraceae	Rubellimicrobium	unclassified_Rubellimicrobium	0	0	0	0	0	0	0	0	0	6.86493e-05	0	0	0	0	2.75604e-05	0	0	0	0	0	0	0	0	0	0	0	0	0	0	0	0	0	0	0	0	0
Proteobacteria	Alphaproteobacteria	Rhodobacterales	Rhodobacteraceae	Ruegeria	unclassified_Ruegeria	0	0	0	0	0	0	0	0	0	0	0	0	0	0	0	0	1.35779e-05	0	0	0	0	0	0	0	0	0	0	9.0905e-05	0.000120043	0	0	0	0.000160432	0.000134184	0.000132291	0
Proteobacteria	Alphaproteobacteria	Rhodobacterales	Rhodobacteraceae	unclassified_Rhodobacteraceae	unclassified_Rhodobacteraceae	0	2.65904e-05	9.38564e-05	0	5.20535e-05	0	0	0	0	0	0	0	0	0	0	0	0	0	0	0	0	0	1.4863e-05	0	0	2.91967e-05	0	0.000121207	7.50266e-05	8.85021e-05	4.34172e-05	5.87199e-05	0.000102093	0.000134184	8.81938e-05	0.000181491
Proteobacteria	Alphaproteobacteria	Rhodospirillales	unclassified_Rhodospirillales	unclassified_Rhodospirillales	unclassified_Rhodospirillales	0	0	0	0	0	2.6475e-05	0	0	0	0	0	0	0	0	0	0	0	0	0.000291405	4.33984e-05	0.000101633	0.00032128	0.000222946	0.000120313	0.000150841	0.00105108	0.000886847	0.000212112	0.000300107	0.000118003	0.000535479	0.000587199	1.45847e-05	0.000104365	2.93979e-05	0
Proteobacteria	Alphaproteobacteria	Rhodospirillales	unclassified_Rhodospirillales	uncultured_rumen_bacterium	unclassified_Rhodospirillales	0	0	0	0	0	2.6475e-05	0	0	0	0	0	0	0	0	0	0	0	0	0	2.89323e-05	0	0	0	0	0	0	0	0	0	0	0	0	0	0	0	0
Proteobacteria	Alphaproteobacteria	Rickettsiales	Anaplasmataceae	Wolbachia	unclassified_Wolbachia	0	0	0	0	0	0	0	9.34305e-05	0	0	0	0	1.3579e-05	0	4.13405e-05	0	2.71558e-05	0	0	0	0	0	0	0	0	0	1.45385e-05	0	0	0	0	0	0	0	0	0
Proteobacteria	Alphaproteobacteria	Rickettsiales	Mitochondria	Spongospora_subterranea	unclassified_Spongospora_subterranea	0	0	0	0	0	0	0	0	0	0	0	0	0	0	0	0	0	0	0	0	0	0	0	0	0	0	0	0	0	0	0	0	0	0	0	0
Proteobacteria	Alphaproteobacteria	Rickettsiales	Mitochondria	unclassified_Mitochondria	unclassified_Mitochondria	0.00144706	1.32952e-05	4.02242e-05	0.000333821	6.50669e-05	3.97125e-05	0	0	0	8.23791e-05	0	0.00198939	0.000108632	2.64908e-05	1.37802e-05	1.37236e-05	0	0.0011057	2.91405e-05	0	0	2.92073e-05	0	0	3.01682e-05	0	0	3.03017e-05	0	2.95007e-05	0	0	2.91694e-05	0	0	0
Proteobacteria	Alphaproteobacteria	Rickettsiales	Mitochondria	uncultured_Rickettsiales_bacterium	uncultured_Rickettsiales_bacterium	0	0	0	0	0	0	0	0	0	0	0	0	0	0	0	0	0	0	0	0	0	0	0	0	0	0	0	0	0	0	0	0	0	0	0	0
Proteobacteria	Alphaproteobacteria	Rickettsiales	SM2D12	unclassified_SM2D12	unclassified_SM2D12	0	0	0	0	0	0	0	0	0	0	0	0	0	0	0	0	0	0	0	0	0	0	0	0	0	0	0	0	0	0	0	0	0	0	0	0
Proteobacteria	Alphaproteobacteria	Rickettsiales	unclassified_Rickettsiales	unclassified_Rickettsiales	unclassified_Rickettsiales	0	0	0	0	0	0	0	0	0	0	0	0	0	0	0	0	0	0	0	0	8.71143e-05	2.92073e-05	0	0	0	1.45983e-05	8.72309e-05	1.51508e-05	0	0.000132753	2.89448e-05	0	0	0	5.87959e-05	0
Proteobacteria	Alphaproteobacteria	Rickettsiales	unclassified_Rickettsiales	uncultured_Alphaproteobacteria_bacterium	unclassified_Rickettsiales	0	0	0	0	0	0	0	0	0	0	0	0	0	0	0	0	0	0	0	0	0	7.30183e-05	0	1.50392e-05	0	0	0	0	0	0	1.44724e-05	2.936e-05	2.91694e-05	0	0	0
Proteobacteria	Alphaproteobacteria	Sphingomonadales	Sphingomonadaceae	Altererythrobacter	unclassified_Altererythrobacter	0	0	0	0	0	0	0	0	0	4.11896e-05	0	0	0	0	0	0	0	0	0	0	0	0	0	0	0	0	0	0	0	0	0	0	0	0	0	0
Proteobacteria	Alphaproteobacteria	Sphingomonadales	Sphingomonadaceae	Novosphingobium	unclassified_Novosphingobium	7.89308e-05	0	0	0	0	0	0	0	0	0	0	0	0	0	0	0	0	0	0	0	0	0	0	0	0	0	0	0	0	0	0	0	0	0	0	0
Proteobacteria	Alphaproteobacteria	Sphingomonadales	Sphingomonadaceae	Sphingobium	unclassified_Sphingobium	0	0	0	0	0	0	0	0	3.97488e-05	0	0	0	0	0	0	0	0	0	0	0	0	0	0	0	0	0	0	0	0	0	0	0	0	0	0	0
Proteobacteria	Alphaproteobacteria	Sphingomonadales	Sphingomonadaceae	Sphingomonas	unclassified_Sphingomonas	0	0	0	0	6.50669e-05	7.9425e-05	5.37158e-05	0	0	0.000219678	3.88571e-05	2.82183e-05	0	0	0	0	0	0	0	0	0	0	0	0	0	0	0	0	0	0	0	0	0	0	0	0
Proteobacteria	Alphaproteobacteria	Sphingomonadales	Sphingomonadaceae	Sphingopyxis	unclassified_Sphingopyxis	5.26205e-05	0	0	0	0	0	0	0	0	0	0	0	0	0	0	0	0	0	0	0	0	0	0	0	0	0	0	0	0	0	0	0	0	0	0	0
Proteobacteria	Alphaproteobacteria	Sphingomonadales	Sphingomonadaceae	Sphingorhabdus	Sphingomonas_sp._HTCC500	0	0	0	0	0	0	0	0	0	0	0	0	0	0	0	0	0	0	0	0	0	0	0	0	0	0	0	0	0	0	0	0	0	0	0	0
Proteobacteria	Alphaproteobacteria	Sphingomonadales	Sphingomonadaceae	unclassified_Sphingomonadaceae	unclassified_Sphingomonadaceae	0.000157862	0	0	0	6.50669e-05	0	0	0	0	0.000384436	0	0	0	0	2.75604e-05	0	0	0	0	0	0	0	0	0	0	0	0	0	0	0	0	0	0	0	2.93979e-05	0
Proteobacteria	Alphaproteobacteria	Tistrellales	Geminicoccaceae	Candidatus_Alysiosphaera	unclassified_Candidatus_Alysiosphaera	0	0	0	0	0	0	0	0	0	2.74597e-05	0	0	0	0	0	0	2.71558e-05	0	0	0	0	0	0	0	0	0	0	0	0	0	0	0	0	0	0	0
Proteobacteria	Alphaproteobacteria	Tistrellales	Geminicoccaceae	unclassified_Geminicoccaceae	unclassified_Geminicoccaceae	0	0	0	0	0	0	0	0	0	0	0	0	0	0	0	0	0	0	0	0	0	0	0	0	0	0	0	1.51508e-05	3.00107e-05	0	0	0	0	0	0	3.02485e-05
Proteobacteria	Alphaproteobacteria	Tistrellales	Geminicoccaceae	unclassified_Geminicoccaceae	uncultured_Alphaproteobacteria_bacterium	0	0	0	0	0	0	0	0	0	0	0	0	0	0	0	0	0	0	0	0	0	0	0	0	0	0	0	0	0	0	0	0	0	0	0	0
Proteobacteria	Alphaproteobacteria	Tistrellales	Geminicoccaceae	unclassified_Geminicoccaceae	uncultured_marine_bacterium	0	0	0	0	0	0	0	0	0	0	0	0	0	0	0	0	0	0	0	0	0	0	0	0	0	0	0	0	0	0	0	1.468e-05	1.45847e-05	1.49094e-05	0	0
Proteobacteria	Alphaproteobacteria	unclassified_Alphaproteobacteria	unclassified_Alphaproteobacteria	unclassified_Alphaproteobacteria	unclassified_Alphaproteobacteria	0	6.64761e-05	0	0	0	0	0	0	0	0	0	0	0	0	0	0	0	0	0	0	0	0	0	0	0	0	0	0	0	0	0	0	2.91694e-05	0	0	0
Proteobacteria	Alphaproteobacteria	unclassified_Alphaproteobacteria	uncultured_Rhodobacteraceae_bacterium	unclassified_Alphaproteobacteria	unclassified_Alphaproteobacteria	0	0	0	0	0	0	0	0	0	0	0	0	0	0	0	0	0	0	0	0	0	0	0	0	0	2.91967e-05	0	0	0	0	0	0	0	0	0	0
Proteobacteria	Alphaproteobacteria	unclassified_Alphaproteobacteria	uncultured_Xanthobacteraceae_bacterium	unclassified_Alphaproteobacteria	unclassified_Alphaproteobacteria	0	0	0	0	0	0	0	0	0	0	0	0	0	0	0	0	0	0	0	0	0	0	0	0	0	0	0	0	0	0	0	0	0	0	0	0
Proteobacteria	Gammaproteobacteria	Burkholderiales	Alcaligenaceae	Achromobacter	unclassified_Achromobacter	0	0.000186133	0	0	0	2.6475e-05	0	0	0	0	0	0	0	2.64908e-05	0	0	0	0	0	0	0	0	0	0	0	0	0	0	0	0	0	0	0	0	0	0
Proteobacteria	Gammaproteobacteria	Burkholderiales	Alcaligenaceae	Advenella	unclassified_Advenella	0.0068012	0.000186133	0	0	0	0	0	0	0	0	0	0	0	0	1.37802e-05	0	0	0	0	0	0	0	0	0	0	0	0	0	0	0	0	0	0	0	0	0
Proteobacteria	Gammaproteobacteria	Burkholderiales	Alcaligenaceae	Alcaligenes	unclassified_Alcaligenes	0.00174963	2.65904e-05	0	0	0	0	2.68579e-05	0	0	0	0	0	0	0	0	0	0	1.31631e-05	5.8281e-05	0	0	0	0	0	0	0	0	0	0	0	0	0	0	0	0	0
Proteobacteria	Gammaproteobacteria	Burkholderiales	Alcaligenaceae	Bordetella	unclassified_Bordetella	0	0	0	0	0	0	0	0	0	0	0	0	0	0	0	0	0	0	0	0	0	0	0	0	0	0	0	0	0	0	0	0	0	0	0	0
Proteobacteria	Gammaproteobacteria	Burkholderiales	Alcaligenaceae	Oligella	Oligella_sp._XS68	0	0	0	6.41964e-05	0	0	0	0	0	2.74597e-05	0	0	0	0	0	0	0	0	0	0	0	0	0	0	0	0	0	0	0	0	0	0	0	0	0	0
Proteobacteria	Gammaproteobacteria	Burkholderiales	Alcaligenaceae	Pelistega_suis	unclassified_Pelistega_suis	0	0	0	0	2.60268e-05	0.000119137	2.68579e-05	0	0	4.11896e-05	0	0	0	0	0	0	0	0	0	0	0	0	0	0	0	0	0	0	0	0	0	0	0	0	0	0
Proteobacteria	Gammaproteobacteria	Burkholderiales	Alcaligenaceae	unclassified_Alcaligenaceae	unclassified_Alcaligenaceae	0.000368344	0	4.02242e-05	0	0	0.0001059	0	0	0	0	0	0	0	0	0	0	0	0	0	0	0	0	0	0	0	0	0	0	0	0	0	0	0	0	0	0
Proteobacteria	Gammaproteobacteria	Burkholderiales	B1_7BS	unclassified_B1_7BS	unclassified_B1_7BS	0	0	0	0	0	0	0	0	0	0	0	0	0	0	0	0	0	0	0	0	0	0	0	0	0	0	0	0	0	0	0	0	0	0	0	0
Proteobacteria	Gammaproteobacteria	Burkholderiales	Burkholderiaceae	Burkholderia_Caballeronia_Paraburkholderia	unclassified_Burkholderia_Caballeronia_Paraburkholderia	0	0	0	0	0	0	0	0	0	0	0	4.23274e-05	0	0	0	0	0	0	0	0	0	0	0	0	0	0	0	0	0	0	0	0	0	0	0	0
Proteobacteria	Gammaproteobacteria	Burkholderiales	Burkholderiaceae	Limnobacter	unclassified_Limnobacter	0	0	0	0	0	2.6475e-05	0	0	0	0	0	0	0	0	0	0	0	0	0	0	0	0	0	0	0	0	0	0	0	0	0	0	0	0	0	0
Proteobacteria	Gammaproteobacteria	Burkholderiales	Burkholderiaceae	unclassified_Burkholderiaceae	unclassified_Burkholderiaceae	0	0	0	0	0	0	0	0	0	0	0	0	0	0	0	0	0	0	0	0	0	0	0	0	0	0	0	0	0	0	0	0	0	0	0	0
Proteobacteria	Gammaproteobacteria	Burkholderiales	Comamonadaceae	Acidovorax	unclassified_Acidovorax	0	0	0	0	0	0	0	0	0	0	0	0	0	0	0	0	2.71558e-05	0	0	0	0	0	0	0	0	0	0	0	0	0	0	0	0	0	0	0
Proteobacteria	Gammaproteobacteria	Burkholderiales	Comamonadaceae	Hydrogenophaga	unclassified_Hydrogenophaga	0	0	0	0	0.000208214	0	0	0	0	0	0	0	0	0	0	0	0	0	0	0	0	0	0	0	0	0	0	0	0	0	0	0	0	0	0	0
Proteobacteria	Gammaproteobacteria	Burkholderiales	Comamonadaceae	Rhizobacter	unclassified_Rhizobacter	0	0	0	0	0	0	0	0	0	0	5.18094e-05	0	0	0	0	0	0	0	0	0	0	0	0	0	0	0	0	0	0	0	0	0	0	0	0	0
Proteobacteria	Gammaproteobacteria	Burkholderiales	Comamonadaceae	unclassified_Comamonadaceae	unclassified_Comamonadaceae	0	3.98857e-05	0	0.000115554	2.60268e-05	3.97125e-05	0	4.00416e-05	0	9.6109e-05	0	0	0	0	0	0	0	0	0	0	0	0	0	0	0	0	0	0	0	0	0	0	0	0	0	0
Proteobacteria	Gammaproteobacteria	Burkholderiales	Methylophilaceae	Methylotenera	unclassified_Methylotenera	0	0	0	0	0	0	0	0	0	0	0	0	0	0	0	0	0	0	0	0	0	0	0	0	0	0	0	0	0	0	0	0	0	0	0	0
Proteobacteria	Gammaproteobacteria	Burkholderiales	Neisseriaceae	Conchiformibius	Neisseria_canis	0	0	0	0	0	3.97125e-05	0	0	0	0	0	0	0	0	0	0	0	0	0	0	0	0	0	0	0	0	0	0	0	0	0	0	0	0	0	0
Proteobacteria	Gammaproteobacteria	Burkholderiales	Neisseriaceae	Neisseria	Neisseria_perflava	0	0	0	0	0	0	0	0	0	0	0	0	0	0	0	0	0	0	0	0	0	0	0	0	0	0	0	0	0	0	0	0	0	0	0	0
Proteobacteria	Gammaproteobacteria	Burkholderiales	Neisseriaceae	Uruburuella	unclassified_Uruburuella	0	0.000119657	0	0	0	0	0	0	0	0	0	0	0	0	0	0	0	0	0	0	0	0	0	0	0	0	0	0	0	0	0	0	0	0	0	0
Proteobacteria	Gammaproteobacteria	Burkholderiales	Neisseriaceae	unclassified_Neisseriaceae	unclassified_Neisseriaceae	0	0	0	0	0	0.0001059	4.02868e-05	0	0	0	0	0	0	0	2.75604e-05	0	0	0	0	0	0	0	0	0	0	0	0	0	0	0	0	0	0	0	0	0
Proteobacteria	Gammaproteobacteria	Burkholderiales	Neisseriaceae	unclassified_Neisseriaceae	uncultured_rumen_bacterium	0	2.65904e-05	0	0	0	0	0	0	0	0	0	0	0	0	0	0	0	0	0	0	0	0	0	0	0	0	0	0	0	0	0	0	0	0	0	0
Proteobacteria	Gammaproteobacteria	Burkholderiales	Nitrosomonadaceae	Ellin6067	unclassified_Ellin6067	0.000434119	0	0	0	0	0	0	0	0	0	0	0	0	0	0	2.74473e-05	0	0	0	0	0	0	0	0	0	0	0	0	0	0	0	0	0	0	0	0
Proteobacteria	Gammaproteobacteria	Burkholderiales	Nitrosomonadaceae	MND1	unclassified_MND1	0	0	0	0	0	0	0	0	0	5.49194e-05	0	0	0	0	0	0	0	0	0	0	0	0	0	0	0	0	0	0	0	0	0	0	0	0	0	0
Proteobacteria	Gammaproteobacteria	Burkholderiales	Nitrosomonadaceae	MND1	uncultured_Burkholderiaceae_bacterium	0	0	0	6.41964e-05	0	0	0	0	0	0	0	0	0	0	0	0	0	0	0	0	0	0	0	0	0	0	0	0	0	0	0	0	0	0	0	0
Proteobacteria	Gammaproteobacteria	Burkholderiales	Nitrosomonadaceae	Nitrosomonas	uncultured_soil_bacterium	0	0	0	0	0	0	0	0	0	2.74597e-05	0	0	0	0	0	0	0	0	0	0	0	0	0	0	0	0	0	0	0	0	0	0	0	0	0	0
Proteobacteria	Gammaproteobacteria	Burkholderiales	Oxalobacteraceae	Massilia	unclassified_Massilia	0.000618291	0	0	0	0	0	0	0	2.64992e-05	0	0	0	0	0	0	0	0	0	0	0	0	0	0	0	0	0	0	0	0	0	0	0	0	0	0	0
Proteobacteria	Gammaproteobacteria	Burkholderiales	Oxalobacteraceae	Oxalobacter	Oxalobacter_formigenes	0	0	0	0	0	0	0	0	0	0	0	0	0	0	0	0	0	0	0	0	0	0	0	0	0	0	0	0	0	0	0	0	0	0	0	0
Proteobacteria	Gammaproteobacteria	Burkholderiales	Oxalobacteraceae	Oxalobacter	unclassified_Oxalobacter	0	0	0	0	0	0	0	0	0	0	0	0	0	0	0	0	0	0	0	0	0.000101633	0.000116829	0	0.000240627	0	0	0	0	0	0	0	0	0	0	0	0
Proteobacteria	Gammaproteobacteria	Burkholderiales	Oxalobacteraceae	Undibacterium	unclassified_Undibacterium	0	0	0	0	0	0	0	0	0	0	0	0	0	0	0	0	0	0	0	0	0	0	0	0	0	0	0	0	0	0	0	0	0	0	0	0
Proteobacteria	Gammaproteobacteria	Burkholderiales	Oxalobacteraceae	unclassified_Oxalobacteraceae	unclassified_Oxalobacteraceae	0	0	0	0	0	0	0	0	0	0	0	0	0	0	0	0	0	0	0	0	2.90381e-05	0	0	0	0	0	0	0	0	0	0	0	0	0	0	0
Proteobacteria	Gammaproteobacteria	Burkholderiales	Rhodocyclaceae	Azoarcus	unclassified_Azoarcus	0	0	0	0	0	0	0	0	0	0	0	0	0	0	0	0	0	0	0	0	0	0	0	0	0	0	0	0	0	0	0	0	0	0	0	0
Proteobacteria	Gammaproteobacteria	Burkholderiales	Rhodocyclaceae	Azospira	uncultured_Rhodocyclaceae_bacterium	0	0	0	0	0	0	0	0	0	0	0	0	0	0	0	0	0	0	0	0	0	0	0	0	0	0	0	0	0	0	0	0	0	0	0	0
Proteobacteria	Gammaproteobacteria	Burkholderiales	Rhodocyclaceae	Propionivibrio	Propionivibrio_sp._canine_oral_taxon_223	0	0	1.34081e-05	0	0	1.32375e-05	0	0	0	1.37299e-05	0	0	0	0	0	0	0	0	0	0	0	0	0	0	0	0	0	0	0	0	0	0	0	0	0	0
Proteobacteria	Gammaproteobacteria	Burkholderiales	Rhodocyclaceae	Zoogloea	Zoogloea_oryzae	0	0	0	0	9.10936e-05	0	0	0	0	0	0	0	0	0	0	0	0	0	0	0	0	0	0	0	0	0	0	0	0	0	0	0	0	0	0	0
Proteobacteria	Gammaproteobacteria	Burkholderiales	Rhodocyclaceae	Zoogloea	unclassified_Zoogloea	0	0	0	0	0	0	0	0	0	0	0	0	0	0	0	0	0	0	0	0	0	0	0	0	0	0	0	0	0	0	0	0	0	0	0	0
Proteobacteria	Gammaproteobacteria	Burkholderiales	Rhodocyclaceae	unclassified_Rhodocyclaceae	Azoarcus_nasutitermitis	0	0	0	0	0	2.6475e-05	0	0	0	0	0	0	0	0	0	0	0	0	0	0	0	0	0	0	0	0	0	0	0	0	0	0	0	0	0	0
Proteobacteria	Gammaproteobacteria	Burkholderiales	Rhodocyclaceae	unclassified_Rhodocyclaceae	unclassified_Rhodocyclaceae	3.94654e-05	0	0	0	2.60268e-05	0	0	0	0	0	0	0	0	0	2.75604e-05	0	0	0	0	0	0	0	0	0	0	0	0	0	0	0	0	0	0	0	0	0
Proteobacteria	Gammaproteobacteria	Burkholderiales	SC_I_84	unclassified_SC_I_84	unclassified_SC_I_84	0	0	0	6.41964e-05	0	0	0	0	2.64992e-05	0	0	0	0	0	0	0	0	0	0	0	0	0	0	0	0	0	0	0	0	0	0	0	0	0	0	0
Proteobacteria	Gammaproteobacteria	Burkholderiales	Sutterellaceae	Parasutterella	Burkholderiales_bacterium_YL45	0	0	0	0	0	0	6.71447e-05	0	0	0	0	0	0	0	0	0	0	0	0	0	0	0	0	0	0	0	0	0	0	0	0	0	0	0	0	0
Proteobacteria	Gammaproteobacteria	Burkholderiales	Sutterellaceae	Parasutterella	Parasutterella_secunda	0	5.31809e-05	0	0	0	0	0	0	0	0	0	0	0	0	0	0	0	0	0	0	0	0	0	0	4.52523e-05	0	0	0	0	1.47504e-05	0	5.87199e-05	0	0	0.000102893	0
Proteobacteria	Gammaproteobacteria	Burkholderiales	Sutterellaceae	Parasutterella	unclassified_Parasutterella	0	0	0	0	0	0	0	0	0	0	0	0	0	0	0	0	0	0	0	0	0	0	0	0	0	0	0	0	0	0	2.89448e-05	0	0	0	0	0
Proteobacteria	Gammaproteobacteria	Burkholderiales	Sutterellaceae	Sutterella	Sutterella_sp._6FBBBH3	0	0	0	0	0	0	0	0	0	0	0	0	0	0	0	0	0	0	0.00170472	0	0	0	0	0	0.000512859	0.00306565	0.00468139	0.00316652	0	0	0.00215639	0	0.00100634	0.000193822	0.000661453	0
Proteobacteria	Gammaproteobacteria	Burkholderiales	Sutterellaceae	Sutterella	Sutterella_stercoricanis	0	0	0	0	0	0	0	0	0	0	0	0	0	0	0	0	0	0	0	0	0	0	0	0	0	5.83933e-05	0	0	0	0	0	0	0	0	0	0
Proteobacteria	Gammaproteobacteria	Burkholderiales	Sutterellaceae	Sutterella	Sutterellaceae_bacterium_Marseille_P2968	0	0	0	0	0	0	0	0	0	0	0	0	0	0	0	0	0	0	0	0	0	0	0	0	0	0	0	0	0	0	0	0	0	4.47281e-05	0	0
Proteobacteria	Gammaproteobacteria	Burkholderiales	Sutterellaceae	Sutterella	unclassified_Sutterella	0	0.000252609	0.000496098	0	0	0.000807487	0	0	0	0	0	0	0	0	0	0	0	0	0.000830504	0.000202526	0.00015971	0.000116829	0.000118904	0.000105274	0.00099555	0.00164961	0.000363462	0.000818145	0.000750266	0.000457261	0.000390755	0.001468	0	8.94561e-05	0.000837841	4.53727e-05
Proteobacteria	Gammaproteobacteria	Burkholderiales	Sutterellaceae	unclassified_Sutterellaceae	unclassified_Sutterellaceae	0	0	0	0	2.60268e-05	0	0	0	0	2.74597e-05	0	0	0	0	0	0	0	0	0	0	0	0	0	0	0	0	0	0	0	0	0	0	0	7.45468e-05	0	0
Proteobacteria	Gammaproteobacteria	Burkholderiales	Sutterellaceae	unclassified_Sutterellaceae	uncultured_soil_bacterium	0	0	0	0	0	0	0	0	0	0	3.88571e-05	0	0	0	0	0	0	0	0	0	0	0	0	0	0	0	0	0	0	0	0	0	0	0	0	0
Proteobacteria	Gammaproteobacteria	Burkholderiales	T34	unclassified_T34	unclassified_T34	0.000236792	0	0	0	0	0	0	0	0	0	0	0	0	0	0	0	6.78896e-05	0	0.000145703	1.44661e-05	0.000246824	0.00106607	0.000936371	0.00377483	0	0.000160582	0	0	0	0.00777343	0	0.000366999	0.00438999	0.00633647	0	0.0004991
Proteobacteria	Gammaproteobacteria	Burkholderiales	unclassified_Burkholderiales	unclassified_Burkholderiales	unclassified_Burkholderiales	0	5.31809e-05	4.02242e-05	0	0	0	0	0	0	0	0	0	0	0	0	0	0	0	0	0.000202526	0.000130672	0.000671768	8.91782e-05	0.000135353	3.01682e-05	2.91967e-05	0.000174462	0.000121207	0	5.90014e-05	5.78896e-05	0.00011744	4.37541e-05	0	0.000117592	0
Proteobacteria	Gammaproteobacteria	CCD24	uncultured_gamma_proteobacterium	uncultured_gamma_proteobacterium	uncultured_gamma_proteobacterium	0	0	0	0	0	0	0	0	0	1.37299e-05	0	0	0	0	0	0	4.07338e-05	0	0	0	0	0	0	0	0	0	0	0	0	0	0	1.468e-05	0	0	0	0
Proteobacteria	Gammaproteobacteria	Cardiobacteriales	Cardiobacteriaceae	Suttonella	Suttonella_indologenes	0	0	0	0	0	0	0	0	0	0	0	0	0	0	0	0	2.71558e-05	0	0	0	0	0	0	0	0	0	0	0	0	0	0	0	0	0	0	0
Proteobacteria	Gammaproteobacteria	Cardiobacteriales	Wohlfahrtiimonadaceae	Ignatzschineria	Ignatzschineria_indica	0	0	0	2.56786e-05	0	0	0	0	0	0	0	0	0	0	0	0	0	0	0	0	0	0	0	0	0	0	0	0	0	0	0	0	0	0	0	0
Proteobacteria	Gammaproteobacteria	Cardiobacteriales	Wohlfahrtiimonadaceae	Ignatzschineria	Ignatzschineria_sp.	0.000447274	3.98857e-05	0	0	0	0	0	0	0	0	0	0	0	0	0	0	0	0	0	0	0	0	0	0	0	0	0	0	0	0	0	0	0	0	0	0
Proteobacteria	Gammaproteobacteria	Cardiobacteriales	Wohlfahrtiimonadaceae	Ignatzschineria	unclassified_Ignatzschineria	0.000381499	0	0	0	0	3.97125e-05	0	0	0	0	0	0	0	0	0	0	0	0	0	0	0	0	0	0	0	0	0	0	3.00107e-05	0	0	0	0	0	0	0
Proteobacteria	Gammaproteobacteria	Cardiobacteriales	Wohlfahrtiimonadaceae	unclassified_Wohlfahrtiimonadaceae	unclassified_Wohlfahrtiimonadaceae	0	0	0	0	0	6.61875e-05	0	0	0	0	0	0	0	0	0	0	0	0	0	0	0	0	0	0	0	0	0	0	0	0	0	0	0	0	0	0
Proteobacteria	Gammaproteobacteria	Coxiellales	Coxiellaceae	Coxiella	unclassified_Coxiella	0	3.98857e-05	0	0	0	0	0	0	0	2.74597e-05	0	0	0	0	0	0	0	0	0	0	0	0	0	0	0	0	0	0	0	0	0	0	0	0	0	0
Proteobacteria	Gammaproteobacteria	Diplorickettsiales	Diplorickettsiaceae	Aquicella	unclassified_Aquicella	0	0	0	0	0	0	0	0	0	9.6109e-05	0	0	0	0	0	0	0	0	0	0	0	0	0	0	0	0	0	0	0	0	0	0	0	0	0	0
Proteobacteria	Gammaproteobacteria	Diplorickettsiales	Diplorickettsiaceae	Rickettsiella	uncultured_Rickettsiella_sp.	0	0	0	0	0	0	0	0	0	5.49194e-05	0	0	0	0	0	0	0	0	0	0	0	0	0	0	0	0	0	0	0	0	0	0	0	0	0	0
Proteobacteria	Gammaproteobacteria	Diplorickettsiales	Diplorickettsiaceae	unclassified_Diplorickettsiaceae	unclassified_Diplorickettsiaceae	0	0	0	0	0	0	0	0	0	0	0	0	0	0	0	0	0	0	0	0	0	0	0	0	0	0	0	0	0	0	0	0	0	0	0	0
Proteobacteria	Gammaproteobacteria	EPR3968_O8a_Bc78	unclassified_EPR3968_O8a_Bc78	unclassified_EPR3968_O8a_Bc78	unclassified_EPR3968_O8a_Bc78	0	0	0	0	0	3.97125e-05	0	0	0	0	0	0	0	0	0	0	0	0	0	0	0	0	0	0	0	0	0	0	0	0	0	0	0	0	0	0
Proteobacteria	Gammaproteobacteria	Enterobacterales	Aeromonadaceae	Aeromonas	unclassified_Aeromonas	0	0	0	5.13571e-05	0	0	0	0	0	0	0	0	0	0	0	0	0	0	0	0	0	0	0	0	0	0	0	0	0	0	0	0	4.37541e-05	0	0	0
Proteobacteria	Gammaproteobacteria	Enterobacterales	Alteromonadaceae	Alteromonas	unclassified_Alteromonas	0	0	0	0	0	0	0	4.00416e-05	0	0	3.88571e-05	4.23274e-05	0	0	0	0	0	0	0	0	0	0	0	0	0	0	0	0	0	0	0	0	0	0	0	0
Proteobacteria	Gammaproteobacteria	Enterobacterales	Colwelliaceae	Thalassotalea	Thalassotalea_marina	0	0	0	0	0	0	0	4.00416e-05	0	0	0	0	0	0	0	0	0	0	0	0	0	0	0	0	0	0	0	0	0	0	0	0	0	0	0	0
Proteobacteria	Gammaproteobacteria	Enterobacterales	Enterobacteriaceae	Citrobacter	unclassified_Citrobacter	0	0.000691351	0.0026548	0	0	0.000860437	0	0	0	0	0	0	0	0	0	0	0	0	0	0	0	0	0	0	0	0	0	0	0	0	0	0	0	0	0	0
Proteobacteria	Gammaproteobacteria	Enterobacterales	Enterobacteriaceae	Enterobacter	unclassified_Enterobacter	0.000868238	0.00252609	0.00124695	0	0.000611629	0	9.40026e-05	0	0	0	0	0	0	0	0	0	0	0	0	0	0	0	0.000312124	0.000120313	0	0	8.72309e-05	0	0	0	0	0	0	0	0	0
Proteobacteria	Gammaproteobacteria	Enterobacterales	Enterobacteriaceae	Escherichia_Shigella	unclassified_Escherichia_Shigella	0.101031	0.200133	0.172039	0.00270909	0.181784	0.081768	0.000658018	0.0649876	0.113006	0.00598622	0.422053	0.0149557	0.298643	0.0144375	0.017115	0.00569531	0.00146642	0.0634066	0.0970816	0.000159127	0.000537205	0.00331503	0.00402788	0.00795572	0.00102572	0.0214157	0.00527747	0.00107571	0.00891316	0.0177447	0.0289738	0.00519671	0.00474003	0.00178912	0.00558561	0.00769824
Proteobacteria	Gammaproteobacteria	Enterobacterales	Enterobacteriaceae	Klebsiella	unclassified_Klebsiella	0.013826	0.000638171	0.00274865	0	0.00519234	0.00244894	0	0	0	0	0	0	0.000149369	0	0	0	0	0.00230354	0	0	0	0	0	0	0	0	0	0	0	0	0	0	0	0	0	0
Proteobacteria	Gammaproteobacteria	Enterobacterales	Enterobacteriaceae	unclassified_Enterobacteriaceae	unclassified_Enterobacteriaceae	0.0196406	0.0595094	0.00726717	0.000423696	0.000442455	0.0210609	0.000295437	0.000306986	0.000569733	0.000219678	0	0	0.000190106	6.62269e-05	0	0	8.14675e-05	0	0.00185042	0.000549713	1.45191e-05	0.000102226	0.000475617	0.000887311	0.000105589	0	0.000101769	0	0.00142551	0.000118003	0.000202614	0	0.000539634	0.000178912	0	0
Proteobacteria	Gammaproteobacteria	Enterobacterales	Idiomarinaceae	Idiomarina	Pseudidiomarina_sediminum	0	0	0	0	0	0	0	0	0	0	0	2.82183e-05	0	0	2.75604e-05	0	0	0	0	0	0	0	0	0	0	0	0	0	0	0	0	0	0	0	0	0
Proteobacteria	Gammaproteobacteria	Enterobacterales	Morganellaceae	Buchnera	Buchnera_aphidicola	0	0	0	0	0	0	5.37158e-05	0	0	0	0	0	0	0	2.75604e-05	0	0	0	0	0	0	0	0	0	0	0	0	0	0	0	0	0	0	0	0	0
Proteobacteria	Gammaproteobacteria	Enterobacterales	Morganellaceae	Morganella	unclassified_Morganella	0	0.000385561	0	0	0	0.0001059	0	0	0	0	0	0	0	0	0	0	0	0	0	0	0	0	0	0	0	0	0	0	0	0	0	0	0	0	0	0
Proteobacteria	Gammaproteobacteria	Enterobacterales	Morganellaceae	Proteus	unclassified_Proteus	0	0.000997142	0.000254753	0	3.90401e-05	0.00411686	0	0	0	0	0	0	0	0	0	0	0	0	0	0	0	0	0	0	0	0	0	0	0	0	0	0	0	0	0	0
Proteobacteria	Gammaproteobacteria	Enterobacterales	Morganellaceae	Providencia	unclassified_Providencia	0.000171017	0.00755169	0.00301681	0.000231107	0	0.000820725	0	0	0	0	0	0	0	0	0	0	0	0	0	0	0	2.92073e-05	0	3.00784e-05	0	0	0	0	0	0	0	0	0	0	0	0
Proteobacteria	Gammaproteobacteria	Enterobacterales	Pasteurellaceae	Actinobacillus	Actinobacillus_indolicus	0	0	0.00541686	0	0	0.00648637	0.0101523	0	0	2.74597e-05	0	0	0	0	0	0	0	0	0	0	0	0	0	3.00784e-05	0	0	5.81539e-05	0	0	0	0	0	0	0	0	0
Proteobacteria	Gammaproteobacteria	Enterobacterales	Pasteurellaceae	Actinobacillus	Actinobacillus_minor	0	0.00674068	0.00903703	0	0	0.00378592	0.030806	0	0	0	0	0	0.000706109	0.000384116	0.000675229	0.00251142	0	0	0	0	0	0	0	0	0	0	0	0	0	0	0	0	0	0	0	0
Proteobacteria	Gammaproteobacteria	Enterobacterales	Pasteurellaceae	Actinobacillus	Actinobacillus_porcinus	0.000420964	0.0446321	0.0148695	0	0.00171777	0.0154614	0.104464	0	0.000105997	0	0	0	0.00217264	0.000702005	0.000620108	0.0338699	0.00217247	0	0	0	0	0	0	0	1.50841e-05	0.000496343	0	0	0	0	0	0	0	2.98187e-05	0	0
Proteobacteria	Gammaproteobacteria	Enterobacterales	Pasteurellaceae	Actinobacillus	Actinobacillus_porcitonsillarum	0	0.00450708	0.00299	0	0	0.0147333	0.0236618	0	0	0	0.00225371	0	0	0.00156296	0.0115754	0.00317016	0	0	0	0	0	0	0	0	0	0	0	0	0	0	0	0	0	0	0	0
Proteobacteria	Gammaproteobacteria	Enterobacterales	Pasteurellaceae	Actinobacillus	Bisgaard_Taxon_10	0	0.0114738	0.000536322	0	9.10936e-05	0.00109871	0.00118175	0	0	0	7.77142e-05	0	0.00123569	0	0.00176386	0.000411709	0.00192806	0.000105305	0	0	0	2.92073e-05	0	0	0	0	0	1.51508e-05	4.5016e-05	0	0.000130252	0	2.91694e-05	0	4.40969e-05	0
Proteobacteria	Gammaproteobacteria	Enterobacterales	Pasteurellaceae	Actinobacillus	[Actinobacillus]_rossii	5.26205e-05	0.0213654	0.0537663	0	0	0.00782336	0.00307523	0	0	0	0	0	0	0	0.000840591	0.00592861	0.000312292	0	0	0	0	0	0	0	0	0.000204377	0	0	0	0	0	0	0	0	0	0
Proteobacteria	Gammaproteobacteria	Enterobacterales	Pasteurellaceae	Actinobacillus	unclassified_Actinobacillus	0	0.0272286	0.0247915	3.85178e-05	0	0.0691791	0.0714689	0	0	0	0.000595809	0	0.00055674	0.00135103	0.00469904	0.0175251	4.07338e-05	7.89785e-05	0	0	1.45191e-05	0	0	0	0	2.91967e-05	0	0	0	0	0	0	0	0	0	0
Proteobacteria	Gammaproteobacteria	Enterobacterales	Pasteurellaceae	Haemophilus	unclassified_Haemophilus	0	0	0	0	0	0	0	0	0	0	0	0	0	0	0	0	0	0	0	0	0	0	0	0	0	0	0	0	0	0	0	0	0	0	0	0
Proteobacteria	Gammaproteobacteria	Enterobacterales	Pasteurellaceae	Pasteurella	[Pasteurella]_aerogenes	0	0.0183474	0.110643	0	0.00135339	0.00632752	0.00808423	0	0	0	0	0	0.000583898	0.000370871	0.00151582	0.00388379	0	0	7.28513e-05	0	0	0	0	0	0	0	0	0	0	0	0	0	0	0	0	0
Proteobacteria	Gammaproteobacteria	Enterobacterales	Pasteurellaceae	unclassified_Pasteurellaceae	unclassified_Pasteurellaceae	7.89308e-05	0	6.70403e-05	0	0	0.00111195	5.37158e-05	0	0	0	0	0	0	0.000225172	2.75604e-05	0.000727353	0	0	2.91405e-05	0	0	0	0	0	0	2.91967e-05	0	0	0	0	0	7.33999e-05	0	0	0	0
Proteobacteria	Gammaproteobacteria	Enterobacterales	Psychromonadaceae	Motilimonas	Motilimonas_eburnea	0	0	0	0	0	0	0	0	0	0	0	0	0	0	0	0	0	0	0	0	0	0	0	0	0	0	0	0	0	2.95007e-05	0	0	0	0	0	0
Proteobacteria	Gammaproteobacteria	Enterobacterales	Psychromonadaceae	Motilimonas	unclassified_Motilimonas	0	0	0	0	0	0	0	0	0	0	0	0	0	0	0	0	0	0	0	0	0	0	0	0	0	1.45983e-05	0	0	0	0	0	0	2.91694e-05	0	5.87959e-05	1.51242e-05
Proteobacteria	Gammaproteobacteria	Enterobacterales	Psychromonadaceae	unclassified_Psychromonadaceae	unclassified_Psychromonadaceae	0	0	0	0	0	0	0	0	0	0	0	0	0	0	0	0	0	0	0	0	0	0	0	0	0	0	0	4.54525e-05	3.00107e-05	0	5.78896e-05	2.936e-05	0	0	0	0
Proteobacteria	Gammaproteobacteria	Enterobacterales	Shewanellaceae	Shewanella	Shewanella_sp._KALAICIBA10	0	0	0	0	0	0	0	0	0	0	0	0	0	0	0	0	0	0	0	0	0	0	0	0	0	0	0	0	0	0	0	0	0	0	0	0
Proteobacteria	Gammaproteobacteria	Enterobacterales	Shewanellaceae	Shewanella	unclassified_Shewanella	0	0.000199428	0	6.41964e-05	0	0.00015885	0	0	0	0	0	0	0	0	0	0	0	0	0	0	0	0	0	0	0	0	0	0	0	0	0	0	0	0	0	0
Proteobacteria	Gammaproteobacteria	Enterobacterales	Succinivibrionaceae	Succinivibrio	unclassified_Succinivibrio	0.00160493	0	0	0	3.90401e-05	0	0	0	0	0.000247137	0	0	0	0	1.37802e-05	0	0	0	0.0163478	0.00185166	0.0012196	0.00125591	0.00257131	0.00197013	0.0193831	0.0052554	0.00958086	0.00737845	0.000390138	0.000132753	0.00150513	0.00145332	0.00822577	0.00150584	0.00189617	0.000302485
Proteobacteria	Gammaproteobacteria	Enterobacterales	Succinivibrionaceae	Succinivibrio	uncultured_Succinivibrio_sp.	0	0	0	0	0	0	0	0	0	0	0	0	0	0	0	0	0	0	0	0	0	0	0	4.51175e-05	3.01682e-05	0	0	0	4.5016e-05	0	0	2.936e-05	0.000262525	2.98187e-05	5.87959e-05	0
Proteobacteria	Gammaproteobacteria	Enterobacterales	Succinivibrionaceae	Succinivibrionaceae_UCG_001	unclassified_Succinivibrionaceae_UCG_001	0	0	0	0	0	0	0	0	0	0	0	0	0	0	0	0	0	0	0	0	0	0	0	0	0	0	0	0	0	0	0	0	0	0	0	0
Proteobacteria	Gammaproteobacteria	Enterobacterales	Succinivibrionaceae	Succinivibrionaceae_UCG_002	uncultured_rumen_bacterium	0	0	0	0	0	0	0	0	0	0	0	0	0	0	0	0	0	0	0	0	0	0	0	3.00784e-05	0	0	0	0	0	0	0	0	0	0	0	0
Proteobacteria	Gammaproteobacteria	Enterobacterales	Succinivibrionaceae	unclassified_Succinivibrionaceae	unclassified_Succinivibrionaceae	0	0	0	0	0	0	0	0	0	0	0	0	0	0	0	0	0	0	0.000116562	0	0	0	2.97261e-05	0	0.000135757	2.91967e-05	0.000261693	3.03017e-05	0	0	0	2.936e-05	0	0	0	0
Proteobacteria	Gammaproteobacteria	Enterobacterales	Vibrionaceae	Photobacterium	Photobacterium_damselae	0	0	0	0	0	0	0	0	0	0	0	0	0	0	0	0	0	0	0	0	0	0	0	0	9.05046e-05	0	0	0.000802994	0.00067524	0.00041301	0.000477589	0.000557839	0.00071465	0.000596374	0.000485066	0
Proteobacteria	Gammaproteobacteria	Enterobacterales	Vibrionaceae	Photobacterium	unclassified_Photobacterium	0	0	0	0	0	0	0	0	0	0	0	0	0	0	0	0	0	0	0	0	0	0	0	0	0	0	8.72309e-05	0	0	0	0	0	0	0	0	3.02485e-05
Proteobacteria	Gammaproteobacteria	Enterobacterales	Vibrionaceae	Vibrio	unclassified_Vibrio	0	0	4.02242e-05	0	0	0	0	0	0	0	0	0	0	0	0	0	0	0	0	0	0	0	0	0	0	0	0	0.000196961	0.000180064	0.000147504	0.000159196	0.00023488	0.000145847	0.000119275	0.000205786	0
Proteobacteria	Gammaproteobacteria	Enterobacterales	Vibrionaceae	unclassified_Vibrionaceae	unclassified_Vibrionaceae	0	0	0	0	0	0	0	0	0	0	0	0	0	0	0	0	0	0	0	0	0	0	0	0	0	7.29916e-05	0	0	0	0	0	2.936e-05	0	0	0	0
Proteobacteria	Gammaproteobacteria	Enterobacterales	Yersiniaceae	Serratia	unclassified_Serratia	0.000263103	0	0.000589955	0	0	0	0	0	0	0	0	0	0	0	0	0	0	0	0	0	0	0	0	0	0	0	0	0	0	0	0	0	0	0	0	0
Proteobacteria	Gammaproteobacteria	Enterobacterales	Yersiniaceae	unclassified_Yersiniaceae	unclassified_Yersiniaceae	0	0	0	0	0	0.00447427	0	0	0	0	0	0	0	0	0	0	0	0	0	0	0.000145191	0	0	0	0	0	0	0	0	0	0	0	0	0	0	0
Proteobacteria	Gammaproteobacteria	Enterobacterales	unclassified_Enterobacterales	unclassified_Enterobacterales	unclassified_Enterobacterales	0	0.000159543	0.000147489	2.56786e-05	3.90401e-05	0.000569212	0	0	0	0	5.18094e-05	0	0.000108632	0	0	0	0	0	5.8281e-05	0	0	0	0	0	0	0	0	0	0	0	0	2.936e-05	0	0	0	0
Proteobacteria	Gammaproteobacteria	Gammaproteobacteria_Incertae_Sedis	Unknown_Family	Acidibacter	unclassified_Acidibacter	0	0	0	3.85178e-05	0	0	0	0	0	4.11896e-05	0	0	2.7158e-05	0	0	0	5.43117e-05	0	0	0	0	0	0	0	0	0	0	0	0	0	0	0	0	0	0	0
Proteobacteria	Gammaproteobacteria	Gammaproteobacteria_Incertae_Sedis	Unknown_Family	Acidibacter	uncultured_Xanthomonadales_bacterium	0	0	0	0	0	0	0	0	0	0	0	0	0	0	0	0	0	0	0	0	0	0	0	0	0	0	0	0	0	0	0	0	0	0	0	0
Proteobacteria	Gammaproteobacteria	Gammaproteobacteria_Incertae_Sedis	Unknown_Family	Candidatus_Berkiella	unclassified_Candidatus_Berkiella	0	0	0	0	0	0	0	0	0	0	0	0	0	0	0	0	0	0	0	0	0	0	0	0	0	0	0	0	0	0	0	0	0	0	0	0
Proteobacteria	Gammaproteobacteria	Gammaproteobacteria_Incertae_Sedis	Unknown_Family	unclassified_Unknown_Family	unclassified_Unknown_Family	0	0	0	0	0	0	0	0	0	0	0	0	0	0	0	0	0	0	0	0	0	0	0	0	1.50841e-05	1.45983e-05	2.9077e-05	0	0	0	4.34172e-05	2.936e-05	5.83388e-05	2.98187e-05	0	7.56212e-05
Proteobacteria	Gammaproteobacteria	Gammaproteobacteria_Incertae_Sedis	Unknown_Family	uncultured_gamma_proteobacterium	uncultured_gamma_proteobacterium	0	0	0	0	0	0	0	0	0	4.11896e-05	0	0	0	0	0	0	0	0	0	0	0	0	0	0	0	0	0	0	0	0	0	0	0	0	0	0
Proteobacteria	Gammaproteobacteria	Gammaproteobacteria_Incertae_Sedis	Unknown_Family	uncultured_soil_bacterium	uncultured_soil_bacterium	0	0	0	0	0	0	0	0	0	0	0	0	0	0	2.75604e-05	0	0	0	0	0	0	0	0	0	0	0	0	0	0	0	0	0	0	0	0	0
Proteobacteria	Gammaproteobacteria	Immundisolibacterales	Immundisolibacteraceae	unclassified_Immundisolibacteraceae	unclassified_Immundisolibacteraceae	0	0	0	0	0	0	4.02868e-05	0	0	0	0	0	0	0	0	0	0	0	0	0	0	0	0	0	0	0	0	0	0	0	0	0	0	0	0	0
Proteobacteria	Gammaproteobacteria	Legionellales	Legionellaceae	Legionella	unclassified_Legionella	0	0	0	0	0	0	0	0	0	0.000109839	0	0	0	0	0	0	0	0	0	0	0	0	0	0	0	0	0	0	0	0	0	0	0	0	0	0
Proteobacteria	Gammaproteobacteria	Methylococcales	Methylococcaceae	unclassified_Methylococcaceae	uncultured_compost_bacterium	0	0	0	0	0	0	0	0	0	0	0	0	0	0	0	0	0	0	0	0	0	0	0	0	0	0	0	0	0	0	0	0	0	0	0	0
Proteobacteria	Gammaproteobacteria	Methylococcales	Methylomonadaceae	Methylobacter	unclassified_Methylobacter	0	0	0	0	0	0	0	0	0	2.74597e-05	0	0	0	0	0	0	0	0	0	0	0	0	0	0	0	0	0	0	0	0	0	0	0	0	0	0
Proteobacteria	Gammaproteobacteria	Methylococcales	Methylomonadaceae	Methylomicrobium	unclassified_Methylomicrobium	0	0	0	0	2.60268e-05	0	0	0	0	0	0	0	0	0	0	0	0	0	0	0	0	0	0	0	0	0	0	0	0	0	0	0	0	0	0	0
Proteobacteria	Gammaproteobacteria	Nitrococcales	Nitrococcaceae	Nitrococcus	unclassified_Nitrococcus	0	0	0	0	0	0	0	0	0	0	0	0	0	0	0	0	0	0	0	0	0	0	0	0	0	0	0	3.03017e-05	0	0	0	0	2.91694e-05	0	0	0
Proteobacteria	Gammaproteobacteria	PLTA13	uncultured_gamma_proteobacterium	uncultured_gamma_proteobacterium	uncultured_gamma_proteobacterium	0	0	0	0	0	0	0	0	0	8.23791e-05	0	0	0	0	0	0	0	0	0	0	0	0	0	0	0	0	0	0	0	0	0	0	0	0	0	4.53727e-05
Proteobacteria	Gammaproteobacteria	PLTA13	uncultured_proteobacterium	uncultured_proteobacterium	uncultured_proteobacterium	0	0	0	0	0	0	0	0	0	0	0	0	0	0	0	0	0	0	0	0	0	0	0	0	0	0	0	0	0	0	0	0	0	0	0	0
Proteobacteria	Gammaproteobacteria	Pseudomonadales	Alcanivoracaceae	Ketobacter	uncultured_marine_bacterium	0	0	0	0	0	0	0	0	0	0	0	0	0	0	0	0	0	0	0	0	0	0	0	0	0	0	0	0	0	0	0	0	0	0	0	0
Proteobacteria	Gammaproteobacteria	Pseudomonadales	Halieaceae	unclassified_Halieaceae	unclassified_Halieaceae	0	0	0	0	0	0	0	0	0	0	0	0	0	0	0	0	0	0	0	0	0	0	0	0	0	0	0	0	0	0	1.44724e-05	0	0	0	1.4699e-05	0
Proteobacteria	Gammaproteobacteria	Pseudomonadales	Halomonadaceae	Halomonas	unclassified_Halomonas	0.000434119	0	0	2.56786e-05	0	0	4.02868e-05	0	0	0	3.88571e-05	0	0	0	4.13405e-05	0	2.71558e-05	0	0	0	0	0	0	3.00784e-05	0	0	0	0	0	0	0	0	0	0	0	0
Proteobacteria	Gammaproteobacteria	Pseudomonadales	Moraxellaceae	Acinetobacter	Acinetobacter_defluvii	0	0	0	0	0	0.0001059	0	0	0	0	0	0	0	0	0	0	0	0	0	0	0	0	0	0	0	0	0	0	0	0	0	0	0	0	0	0
Proteobacteria	Gammaproteobacteria	Pseudomonadales	Moraxellaceae	Acinetobacter	unclassified_Acinetobacter	0.00214429	0	4.02242e-05	3.85178e-05	0	0	4.02868e-05	4.00416e-05	0.000278242	6.86493e-05	0	0	2.7158e-05	0	2.75604e-05	0.000137236	0	0	0	0	0	0	0	0	0	0	0	0	0	0	0	0	0	0	0	0
Proteobacteria	Gammaproteobacteria	Pseudomonadales	Moraxellaceae	Enhydrobacter	unclassified_Enhydrobacter	0	0	0	0	0	0	0	0	0	2.74597e-05	2.59047e-05	2.82183e-05	0	0	0	0	0	0	0	0	0	0	0	0	0	0	0	0	0	0	0	0	0	0	0	0
Proteobacteria	Gammaproteobacteria	Pseudomonadales	Moraxellaceae	Moraxella	Moraxella_porci	0	0	0	0	0	6.61875e-05	0	0	0	0	0	0	0	0	0	0	0	0	0	0	0	0	0	0	0	0	0	0	0	0	0	0	0	0	0	0
Proteobacteria	Gammaproteobacteria	Pseudomonadales	Moraxellaceae	Moraxella	unclassified_Moraxella	0	2.65904e-05	0	0	0	0	0	0	0	0	0	0	0	0	0	0	0	0	0	0	0	0	0	0	0	0	0	0	0	0	0	0	0	0	0	0
Proteobacteria	Gammaproteobacteria	Pseudomonadales	Moraxellaceae	Perlucidibaca	unclassified_Perlucidibaca	0	0	0	0	0	0	0	0	0	0	0	0	0	0	0	0	0	0	0	0	0	0	0	0	0	0	0	0	0	0	0	0	0	0	0	0
Proteobacteria	Gammaproteobacteria	Pseudomonadales	Moraxellaceae	Psychrobacter	unclassified_Psychrobacter	0	0	0	0	5.20535e-05	0.000463312	0	6.67361e-05	0	0.000356976	0	0	0	0	0.000220483	2.74473e-05	0.000122201	0	0	0	0	1.46037e-05	0	0	4.52523e-05	0	2.9077e-05	0	3.00107e-05	0	0	0	0	0	2.93979e-05	1.51242e-05
Proteobacteria	Gammaproteobacteria	Pseudomonadales	Pseudohongiellaceae	Pseudohongiella	unclassified_Pseudohongiella	0	0	0	0	0	0	0	0	0	0	0	0	0	0	0	0	0	0	0	0	0	0	0	0	0	0	0	0	0	0	0	0	0	0	0	0
Proteobacteria	Gammaproteobacteria	Pseudomonadales	Pseudomonadaceae	Pseudomonas	unclassified_Pseudomonas	0.000802463	0.0011168	0.00274865	0	0	0	0	6.67361e-05	0.000172245	5.49194e-05	2.59047e-05	0	2.7158e-05	0	0	0	0	0	0	0	0	0	0	0	0	0	0	0	3.00107e-05	0	0	0	0	0	0	1.51242e-05
Proteobacteria	Gammaproteobacteria	R7C24	uncultured_proteobacterium	uncultured_proteobacterium	uncultured_proteobacterium	0	0	0	0	0	0	0	0	0	0	0	0	0	0	0	0	0	0	0	0	0	0	0	0	0	0	0	0	0	0	0	0	0	0	0	0
Proteobacteria	Gammaproteobacteria	R7C24	uncultured_soil_bacterium	uncultured_soil_bacterium	uncultured_soil_bacterium	0	0	0	0	0	2.6475e-05	0	0	0	0	0	0	0	0	0	0	0	0	0	0	0	0	0	0	0	0	0	0	0	0	0	0	0	0	0	0
Proteobacteria	Gammaproteobacteria	Steroidobacterales	Steroidobacteraceae	Steroidobacter	unclassified_Steroidobacter	0	0	0	0	0	0	0	0	0	8.23791e-05	0	0	0	0	0	0	0	0	0	0	0	0	0	0	0	0	0	0	0	0	0	0	0	0	0	0
Proteobacteria	Gammaproteobacteria	Steroidobacterales	Steroidobacteraceae	unclassified_Steroidobacteraceae	unclassified_Steroidobacteraceae	0	0	0	0	0	0	0	0	0	0	2.59047e-05	0	0	0	0	0	0	0	0	0	0	0	0	0	0	0	0	0	1.50053e-05	0	0	0	1.45847e-05	0	0	0
Proteobacteria	Gammaproteobacteria	Steroidobacterales	Steroidobacteraceae	unclassified_Steroidobacteraceae	uncultured_soil_bacterium	0	0	0	0	0	5.295e-05	0	0	0	0	0	0	0	0	0	0	0	0	0	0	0	0	0	0	0	0	0	0	0	0	0	0	0	0	0	0
Proteobacteria	Gammaproteobacteria	Steroidobacterales	Woeseiaceae	Woeseia	unclassified_Woeseia	0	0	0	0	0	0	0	0	0	0	0	0	0	0	0	0	0	0	0	0	0	0	0	0	0	0	0	0	1.50053e-05	1.47504e-05	2.89448e-05	4.40399e-05	1.45847e-05	0	0	0
Proteobacteria	Gammaproteobacteria	Xanthomonadales	Rhodanobacteraceae	Chujaibacter	unclassified_Chujaibacter	0	0	0	0	0	0	0	0	0	4.11896e-05	0	0	0	0	0	0	0	0	0	0	0	0	0	0	0	0	0	0	0	0	0	0	0	0	0	0
Proteobacteria	Gammaproteobacteria	Xanthomonadales	Rhodanobacteraceae	Luteibacter	unclassified_Luteibacter	0.000736687	0	0	0	0	0	0	0	0	0	0	0	0	0	0	0	0	0	0	0	0	0	0	0	0	0	0	0	0	0	0	0	0	0	0	0
Proteobacteria	Gammaproteobacteria	Xanthomonadales	Rhodanobacteraceae	unclassified_Rhodanobacteraceae	unclassified_Rhodanobacteraceae	0	0	0	0	0	0	0	0	0	0	0	0	0	0	0	0	0	0	0	0	0	0	0	0	0	0	0	0	0	0	0	0	0	0	0	0
Proteobacteria	Gammaproteobacteria	Xanthomonadales	Xanthomonadaceae	Arenimonas	unclassified_Arenimonas	0	0	0	0	0	0	0	0	0	0	0	0	0	0	0	0	0	0	0	0	0	0	0	0	0	0	0	0	0	0	0	0	0	0	0	0
Proteobacteria	Gammaproteobacteria	Xanthomonadales	Xanthomonadaceae	Luteimonas	Luteimonas_padinae	0	0	0	0	0	0	0	0	0	0	0	0	0	0	0	0	4.07338e-05	0	0	0	0	0	0	0	0	0	0	0	0	0	0	0	0	0	0	0
Proteobacteria	Gammaproteobacteria	Xanthomonadales	Xanthomonadaceae	Luteimonas	unclassified_Luteimonas	0	0	0	0	2.60268e-05	3.97125e-05	0	0	0	0.000535464	0	0	0	0	0	0	0	0	0	0	0	0	0	0	0	0	0	0	0	0	0	0	0	0	0	0
Proteobacteria	Gammaproteobacteria	Xanthomonadales	Xanthomonadaceae	Lysobacter	Lysobacter_maris	0	0	0	0	0	0	0	0	0	0	0	0	0	0	0	0	0	0	0	0	0	0	0	0	0	0	0	0	3.00107e-05	0	0	0	1.45847e-05	0	1.4699e-05	1.51242e-05
Proteobacteria	Gammaproteobacteria	Xanthomonadales	Xanthomonadaceae	Lysobacter	unclassified_Lysobacter	0	0	0	0	0	0	2.68579e-05	0	0	0.000260867	0	0	0	0	0	0	0	0	0	0	0	0	0	0	0	0	0	0	0	0	0	0	0	0	0	0
Proteobacteria	Gammaproteobacteria	Xanthomonadales	Xanthomonadaceae	Pseudoxanthomonas	unclassified_Pseudoxanthomonas	0.000171017	2.65904e-05	0	0	5.20535e-05	0	0	0	0	9.6109e-05	0	0	0	0	0	0	0	0	0	0	0	0	0	0	0	0	0	0	0	0	0	0	0	0	0	0
Proteobacteria	Gammaproteobacteria	Xanthomonadales	Xanthomonadaceae	Stenotrophomonas	unclassified_Stenotrophomonas	0.000631446	0.000531809	0.00109946	0	0	9.26625e-05	2.68579e-05	0	2.64992e-05	0.000384436	0	0	0	0	0	0	0	0	0	0	0	0	0	3.00784e-05	0	0	0	0	0	0	0	0	0	0	0	0
Proteobacteria	Gammaproteobacteria	Xanthomonadales	Xanthomonadaceae	unclassified_Xanthomonadaceae	unclassified_Xanthomonadaceae	0.000420964	0	0	0	0	0	0	0	0	4.11896e-05	0	0	0	0	0	0	0	0	0	0	0	0	0	0	0	0	0	0	0	0	0	0	0	0	0	0
Proteobacteria	Gammaproteobacteria	unclassified_Gammaproteobacteria	unclassified_Gammaproteobacteria	unclassified_Gammaproteobacteria	unclassified_Gammaproteobacteria	0	0	0	0	0	0	0	0	0	0	0	0	0	0	0	0	0	0	0	0	0	0	0	0	0	0	0	4.54525e-05	4.5016e-05	0	0	0	5.83388e-05	2.98187e-05	1.4699e-05	0
Proteobacteria	unclassified_Proteobacteria	unclassified_Proteobacteria	unclassified_Proteobacteria	unclassified_Proteobacteria	unclassified_Proteobacteria	0	0	2.68161e-05	0	0	1.32375e-05	0	0	0	0	2.59047e-05	2.82183e-05	0	0	0	0	0	0	0	0	0	0	0	0	0	0	0	0	0	0	0	0	0	0	0	0
Spirochaetota	Brevinematia	Brevinematales	Brevinemataceae	Brevinema	uncultured_spirochete	0	0	0	0	0	0	0	0	0	0	3.88571e-05	0	0	0	0	0	0	0	0	0	0	0	0	0	0	0	0	0	0	0	0	0	0	0	0	0
Spirochaetota	Leptospirae	Leptospirales	Leptospiraceae	RBG_16_49_21	uncultured_spirochete	0	0	0	0	0	0	0	0	0	0	0	0	0	0	0	0	0	0	0	0	0	0	0	0	0	0	0	0	0	0	0	0	0	0	0	0
Spirochaetota	Spirochaetia	Spirochaetales	Spirochaetaceae	Sphaerochaeta	unclassified_Sphaerochaeta	0	0	0	0	0	2.6475e-05	0	0	0	0	0	0	0	0	0	0	0	0	0	0.000650976	0.000377495	0.000233659	2.97261e-05	0.00054141	0	8.759e-05	0.000101769	6.06033e-05	0.000240085	0.000236006	8.68345e-05	4.40399e-05	0.000233355	7.45468e-05	0.000117592	0.000468852
Spirochaetota	Spirochaetia	Spirochaetales	Spirochaetaceae	Sphaerochaeta	uncultured_prokaryote	0	0	0	0	0	0	0	0	0	0	0	0	0	0	0	0	0	0	0	7.23306e-05	0.000188748	0	0	7.51959e-05	0	0	0	0	0	4.42511e-05	0	0	4.37541e-05	1.49094e-05	0	0.000151242
Spirochaetota	Spirochaetia	Spirochaetales	Spirochaetaceae	Treponema	Treponema_berlinense	0	0	0	0	0	0	0	0	0	4.11896e-05	0	0	0	0	0	0	0	0	0	0.000231458	0.00046461	0.000423506	0.000163493	0.00036094	0.000105589	0.000160582	7.26924e-05	0.000196961	0.000165059	0.000929272	0.000260503	0.00019084	0.000160432	0.000178912	0.000499765	0.00603457
Spirochaetota	Spirochaetia	Spirochaetales	Spirochaetaceae	Treponema	Treponema_porcinum	0	0	0	0	0	1.32375e-05	0	0	0	0	0	0	0	0	0	0	0	1.31631e-05	0.000233124	0.00203972	0.00331034	0.00181085	0.000758015	0.000962507	0.000346934	0.000905096	0.00133754	0.00104541	0.000915325	0.00194705	0.00202614	0.000499119	0.00204186	0.00393607	0.00152869	0.00251062
Spirochaetota	Spirochaetia	Spirochaetales	Spirochaetaceae	Treponema	Treponema_succinifaciens	0	0	0	0	0	0	0	0	0	1.37299e-05	0	0	0	0	0	0	0	0	0	0	0.000740472	0.00016064	2.97261e-05	9.02351e-05	0	1.45983e-05	2.9077e-05	4.54525e-05	0	0	2.89448e-05	2.936e-05	0	0.000164003	7.34948e-05	4.53727e-05
Spirochaetota	Spirochaetia	Spirochaetales	Spirochaetaceae	Treponema	unclassified_Treponema	0	2.65904e-05	1.34081e-05	0	0	0.00113842	8.05737e-05	0	0	2.74597e-05	0	0	0	0	2.75604e-05	0	1.35779e-05	0	4.37108e-05	0.00487508	0.0237096	0.0594369	0.00121877	0.0352518	0.00153858	0.00112407	0.00146839	0.000409072	0.00223579	0.00476436	0.00314051	0.000366999	0.00958215	0.00359315	0.00510054	0.0623875
Spirochaetota	Spirochaetia	Spirochaetales	Spirochaetaceae	Treponema	uncultured_rumen_bacterium	0	0	0	0	0	0	0	0	0	0	0	0	0	0	0	0	0	0	0	0	2.90381e-05	0	0	0	0	0	0	0	0	0	0	0	0	0	0	0
Spirochaetota	Spirochaetia	Spirochaetales	Spirochaetaceae	Treponema	unidentified_rumen_bacterium_RFN95	0	0	0	0	0	0	0	0	0	0	0	0	0	0	0	0	0	0	0	0	0	0.000116829	0	4.51175e-05	0	0	0	0	0	0	0	0	0	0	0	0.000211739
Spirochaetota	Spirochaetia	Spirochaetales	Spirochaetaceae	unclassified_Spirochaetaceae	unclassified_Spirochaetaceae	0	0	0	0	0	0	0	0	0	0	0	0	0	0	0	0	0	0	0	2.89323e-05	0	4.3811e-05	0	0	0	0	0	0	0	0	4.34172e-05	0	0	0	0	6.0497e-05
Synergistota	Synergistia	Synergistales	Synergistaceae	Cloacibacillus	Cloacibacillus_porcorum	0	0	0	0	0	0	0	0	0	0	0	0	0	0	0	0	0	0	0	0	5.80762e-05	0	0	0	0	0	0	0	0	0	0	0	0	0	0	0
Synergistota	Synergistia	Synergistales	Synergistaceae	Cloacibacillus	unclassified_Cloacibacillus	0	0	0	0	0	0	0	0	0	4.11896e-05	0	0	0	0	0	0	0	0	0	0	0	0.000102226	0	0	0	2.91967e-05	0	0	0	0	0	0	0	0	0	0
Synergistota	Synergistia	Synergistales	Synergistaceae	Fretibacterium	unclassified_Fretibacterium	0	3.98857e-05	2.68161e-05	0.000243946	2.60268e-05	0.00015885	0	0	0	0.000274597	0	0	0	0	0	0	4.07338e-05	0	0	0	0	0	0	6.01567e-05	0	0	0	0	0	0	0	0	0	0	0	0
Synergistota	Synergistia	Synergistales	Synergistaceae	Pyramidobacter	unclassified_Pyramidobacter	0	0	2.68161e-05	0	0	0	0	0	0	0	0	0	0	0	0	0	0	0	0	0.000361653	0.00046461	0.000306677	0.000579658	0.000120313	0	0.000145983	4.36154e-05	0.000166659	3.00107e-05	0.000265506	0	8.80799e-05	0.000131262	0.000178912	8.81938e-05	3.02485e-05
Synergistota	Synergistia	Synergistales	Synergistaceae	Pyramidobacter	uncultured_Pyramidobacter_sp.	0	2.65904e-05	0	0.000154071	0	0.00026475	0	0	0	0	0	0	0	0	0	2.74473e-05	0	0	0	0	0	0	0	0	0	0	0	0	0	0	0	0	0	0	0	0
Synergistota	Synergistia	Synergistales	Synergistaceae	Synergistes	Synergistes_jonesii	0	0	0	2.56786e-05	0	0.000238275	0	0	0	0	0	0	0	0	0	0	0	0	0	0	0	4.3811e-05	0	3.00784e-05	0	0	0	0	0	0	0	0	0	0	0	0
Synergistota	Synergistia	Synergistales	Synergistaceae	unclassified_Synergistaceae	unclassified_Synergistaceae	0	0	0	0	0	0	0	0	0	0	0	0	0	0	0	0	0	0	0	0	0	0	0	0	0	0	0	0	0	0	0	0	0	0	0	0
Thermotogota	Thermotogae	Kosmotogales	Kosmotogaceae	Mesotoga	unclassified_Mesotoga	0	0	0	0	0	0	0	0	0	0	0	0	0	0	0	0	0	0	0	0	0	0	0	0	0	0	0	0	0	0	0	0	0	0	0	0
Verrucomicrobiota	Chlamydiae	Chlamydiales	Chlamydiaceae	Chlamydia	Chlamydia_suis	9.20859e-05	0	9.38564e-05	1.28393e-05	0.000130134	1.32375e-05	0	0.00449801	0.00594907	2.74597e-05	3.88571e-05	0.000225746	0	2.64908e-05	0.000482306	0.000178407	5.43117e-05	0.000329077	1.45703e-05	0	2.90381e-05	2.92073e-05	1.4863e-05	1.50392e-05	1.50841e-05	0.000145983	0.000261693	1.51508e-05	0	5.90014e-05	0	0	1.45847e-05	0.000104365	0	0
Verrucomicrobiota	Chlamydiae	Chlamydiales	Chlamydiaceae	Chlamydia	Chlamydiaceae_bacterium_13_1161_820_Vag	0	0	0	0	0	0	0	0.000120125	6.6248e-05	0	0	0	0	0	0	0	0	0	0	0	0	0	0	0	0	0	2.9077e-05	0	0	0	0	0	0	0	0	0
Verrucomicrobiota	Chlamydiae	Chlamydiales	Chlamydiaceae	Chlamydia	unclassified_Chlamydia	0	0	0	0	0	0	0	6.67361e-05	0	0	0	0	0	0	0	0	0	0	0	0	0	0	0	0	0	0	0	0	0	0	0	0	0	0	0	0
Verrucomicrobiota	Chlamydiae	Chlamydiales	Simkaniaceae	Candidatus_Rhabdochlamydia	Candidatus_Rhabdochlamydia_porcellionis	0	0	0	0	0	0	0	0	0	0	0	0	0	0	0	0	0	0	0	0	0	0	0	0	0	0	0	0	0	0	0	0	0	0	0	0
Verrucomicrobiota	Chlamydiae	Chlamydiales	cvE6	unclassified_cvE6	unclassified_cvE6	0	0	0	0	0	0	0	0	0	0	0	0	0	0	0	0	0	0	0	0	0	0	0	0	0	0	0	0	0	0	0	0	0	0	0	0
Verrucomicrobiota	Kiritimatiellae	WCHB1_41	unclassified_WCHB1_41	unclassified_WCHB1_41	unclassified_WCHB1_41	0	0	0	0	0	0	0	0	0	0	0	0	0	0	0	0	0	0	0	0	2.90381e-05	0.000131433	0	0	0	0	0	0	0	0	0	0	0	8.94561e-05	0	0.000408355
Verrucomicrobiota	Kiritimatiellae	WCHB1_41	uncultured_Verrucomicrobia_bacterium	uncultured_Verrucomicrobia_bacterium	uncultured_Verrucomicrobia_bacterium	0	0	0	0	0	0	0	0	0	0	0	0	0	0	0	0	0	0	0	0	0	0	0	0	0	0	0	0	0	0	0	0	0	0	0	0
Verrucomicrobiota	Kiritimatiellae	WCHB1_41	uncultured_rumen_bacterium	uncultured_rumen_bacterium	uncultured_rumen_bacterium	0	0	1.34081e-05	0	0	0	0	0	0	1.37299e-05	0	0	0	0	0	0	0	0	1.45703e-05	0.00127302	0.00177132	0.000379695	0.000520206	0.000406058	0	0.000291967	0.000348923	0	0	4.42511e-05	0.000202614	0	0.000525049	0.00205749	0.000235183	0.00114944
Verrucomicrobiota	Kiritimatiellae	WCHB1_41	unidentified_rumen_bacterium_RFP12	unclassified_unidentified_rumen_bacterium_RFP12	unclassified_unidentified_rumen_bacterium_RFP12	0	0	0	0	0	0	0	0	0	0	0	0	0	0	0	0	0	0	0	0	0.000130672	0	0	7.51959e-05	0	0	0	0	0	0	0	0	0	0	2.93979e-05	0
Verrucomicrobiota	Verrucomicrobiae	Chthoniobacterales	Chthoniobacteraceae	Candidatus_Udaeobacter	unclassified_Candidatus_Udaeobacter	0.000368344	3.98857e-05	0	0	0	0	0	0	0	0	2.59047e-05	4.23274e-05	0	0	0	0	0	0	0	0	0	0	0	0	0	0	0	0	0	0	0	0	0	0	0	0
Verrucomicrobiota	Verrucomicrobiae	Chthoniobacterales	Chthoniobacteraceae	Candidatus_Udaeobacter	uncultured_Verrucomicrobia_bacterium	0	6.64761e-05	0	0	0	0	0	0	0	0	0	0	0	0	0	0	0	0	0	0	0	0	0	0	0	0	0	0	0	0	0	0	0	0	0	0
Verrucomicrobiota	Verrucomicrobiae	Chthoniobacterales	Chthoniobacteraceae	Chthoniobacter	unclassified_Chthoniobacter	0	0	0	0	0	0	0	0	0	0	0	0	0	0	0	0	0	0	0	0	0	0	0	0	0	0	0	0	0	0	0	0	0	0	0	0
Verrucomicrobiota	Verrucomicrobiae	Chthoniobacterales	Terrimicrobiaceae	Terrimicrobium	unclassified_Terrimicrobium	0	0	0	0	0	0	0	0	0	0	0	0	0	0	0	0	0	0	0	0	0	0	0	0	0	0	0	0	0	0	0	0	0	0	0	0
Verrucomicrobiota	Verrucomicrobiae	Chthoniobacterales	Xiphinematobacteraceae	Candidatus_Xiphinematobacter	unclassified_Candidatus_Xiphinematobacter	0	0	0	0	0	0	0	0	0	0	0	0	0	0	0	0	0	0	0	0	0	0	0	0	0	0	0	0	0	0	0	0	0	0	0	0
Verrucomicrobiota	Verrucomicrobiae	Methylacidiphilales	Methylacidiphilaceae	unclassified_Methylacidiphilaceae	Chlorophyta_symbiont_of_Baikalospongia_sp.	0	0	0	0	0	0	0	0	0	0	0	0	0	0	0	0	0	0	0	0	0	0	0	0	0	0	0	0	0	0	0	0	0	0	0	0
Verrucomicrobiota	Verrucomicrobiae	Pedosphaerales	Pedosphaeraceae	ADurb.Bin063_1	unclassified_ADurb.Bin063_1	0	0	0	0	0	0	0	0	0	0	0	0	0	0	0	0	0	0	0	0	0	0	0	0	0	0	0	0	0	0	0	0	0	0	0	0
Verrucomicrobiota	Verrucomicrobiae	Pedosphaerales	Pedosphaeraceae	unclassified_Pedosphaeraceae	unclassified_Pedosphaeraceae	0	0	0	0	0	0	0	0	0	0	0	0	0	0	0	0	0	0	0	0	0	0	0	0	0	0	0	0	0	0	0	0	0	0	0	0
Verrucomicrobiota	Verrucomicrobiae	Pedosphaerales	Pedosphaeraceae	unclassified_Pedosphaeraceae	uncultured_Desulfovibrio_sp.	0	0	0	0	0	0	0	0	0	0	0	0	0	0	0	0	0	0	0	0	0	0	0	0	0	0	0	0	0	0	0	0	0	0	0	0
Verrucomicrobiota	Verrucomicrobiae	Verrucomicrobiales	Akkermansiaceae	Akkermansia	unclassified_Akkermansia	0	0	0	0	0	0	0	0	0	9.6109e-05	0	0	0	0	0	0	0	0	0	0	7.25953e-05	1.46037e-05	0	1.50392e-05	0	0	0	0	0	5.90014e-05	7.2362e-05	0	0.000306279	0.00168476	7.34948e-05	6.0497e-05
Verrucomicrobiota	Verrucomicrobiae	Verrucomicrobiales	Rubritaleaceae	Haloferula	Haloferula_phyci	0	0	0	0	0	0	0	0	0	0	0	0	0	0	0	0	0	0	0	0	0	0	0	0	0	0	0	0	0	0	4.34172e-05	0	0	0	0	0
Verrucomicrobiota	Verrucomicrobiae	Verrucomicrobiales	Rubritaleaceae	Haloferula	unclassified_Haloferula	0	0	0	0	0	0	0	0	0	0	0	0	0	0	0	0	0	0	0	0	0	0	0	0	0	0	0	0	0	0	0	0	0	0	0	3.02485e-05
Verrucomicrobiota	Verrucomicrobiae	Verrucomicrobiales	Rubritaleaceae	Luteolibacter	unclassified_Luteolibacter	0	0	0	0	0	0	0	0	0	0	0	0	0	0	0	0	0	0	0	0	0	0	0	0	0	0	0	0	0	0	0	0	0	0	0	0
Verrucomicrobiota	Verrucomicrobiae	Verrucomicrobiales	Verrucomicrobiaceae	unclassified_Verrucomicrobiaceae	uncultured_verrucomicrobium_DEV009	0	0	0	0	0	0	0	0	0	0	0	0	0	0	0	0	0	0	0	0	0	0	0	0	0	0	0	0	0	0	0	0	0	0	0	0
Verrucomicrobiota	Verrucomicrobiae	unclassified_Verrucomicrobiae	unclassified_Verrucomicrobiae	unclassified_Verrucomicrobiae	unclassified_Verrucomicrobiae	0	0	0	0	0	0	0	0	0	0	0	0	0	0	0	0	0	0	0	0	0	0	0	0	0	0	0	0	0	0	0	0	0	0	0	0
unclassified_Bacteria	unclassified_Bacteria	unclassified_Bacteria	unclassified_Bacteria	unclassified_Bacteria	unclassified_Bacteria	0.000434119	0.000106362	0	0.000141232	2.60268e-05	7.9425e-05	2.68579e-05	0	0	0.00167504	0	4.23274e-05	0	3.97362e-05	0	2.74473e-05	0.000149357	5.26524e-05	0.000160273	0.00114282	0.000275862	0.000146037	0.000252672	0.000571489	0.000150841	0.000248172	2.9077e-05	1.51508e-05	0.000120043	0.000457261	0.000347338	0.00013212	0.000525049	0.000417462	0.000984831	0.000589846

## Sheet: Metabolites
Plasma metabolites
#ID	name	CON1-1	CON1-2	CON1-3	CON1-4	CON1-5	CL1-1	CL1-2	CL1-3	CL1-4	CL1-5	CL1-6	CH1-1	CH1-2	CH1-3	CH1-4	CH1-5	CH1-6	CON_vs_CH_log2FC	CON_vs_CH_Pvalue	CON_vs_CH_VIP	CON_vs_CH_(FC_1_Pvalue_0.05_VIP_1)_regulated	CON_vs_CL_log2FC	CON_vs_CL_Pvalue	CON_vs_CL_VIP	CON_vs_CL_(FC_1_Pvalue_0.05_VIP_1)_regulated	CL_vs_CH_log2FC	CL_vs_CH_Pvalue	CL_vs_CH_VIP	CL_vs_CH_(FC_1_Pvalue_0.05_VIP_1)_regulated	Mass Error (ppm)	Formula	m/z	Retention time (min)	KEGG_annotation	KEGG_pathway_annotation	LM_ID(lipidmaps)	CATEGORY(lipidmaps)	MAIN_CLASS(lipidmaps)	SUB_CLASS	HMDB_ID	CAS	kingdom(HMDB)	super_class(HMDB)	HMDB_taxonomy	sub_class(HMDB)	species
neg_1004	Asparaginyl-Phenylalanine	68.8575	65.3567	47.2779	74.2334	65.7605	107.345	128.436	89.1156	75.2143	81.0123	94.5391	68.7604	140.599	56.4526	75.4314	76.4301	35.2115	0.231354	0.488516	0.631379	unchanged	0.577433	0.00892359	1.34831	up	-0.346079	0.250822	0.679746	unchanged	-0.373975	C13H17N3O4	278.115	0.649083	--	--	--	--	--	--	HMDB0028738	--	Organic compounds	Organic acids and derivatives	Carboxylic acids and derivatives	Amino acids, peptides, and analogues	Animals
neg_1007	Glutathione episulfonium ion	77.6144	35.877	21.7757	6.35404	10.5203	46.5503	46.7608	54.6029	10.6879	25.6369	36.3262	66.3489	8.21882	64.3894	5.22094	16.7573	5.35575	-0.134737	0.881068	0.22699	unchanged	0.272756	0.676734	0.244084	unchanged	-0.407493	0.529244	0.367998	unchanged	0.582488	C12H20N3O6S+	369.077	0.649083	C14874	Metabolism of xenobiotics by cytochrome P450(ko00980);;Chemical carcinogenesis - DNA adducts(ko05204)	--	--	--	--	HMDB0060479	--	Organic compounds	Organic acids and derivatives	Carboxylic acids and derivatives	Amino acids, peptides, and analogues	Animals
neg_1013	Sialyl-Le(a) oligosaccharide	1.39272e-08	1.39272e-08	1.39272e-08	1.39272e-08	1.39272e-08	1.39272e-08	1.39272e-08	1.39272e-08	1.39272e-08	1.39272e-08	1.39272e-08	1.39272e-08	1.39272e-08	1.39272e-08	1.39272e-08	1.39272e-08	1.39272e-08	0	1	0	unchanged	0	1	0	unchanged	0	1	0	unchanged	12.9068	C41H70N2O32	1123.38	0.663383	--	--	--	--	--	--	HMDB0258282	--	Organic compounds	Organic oxygen compounds	Organooxygen compounds	Carbohydrates and carbohydrate conjugates	Animals
neg_1016	4-Hydroxy-L-threonine	70.7799	42.3044	104.179	52.9095	84.2972	50.8828	62.5998	49.6664	36.9202	60.3714	59.7721	38.2819	72.2901	138.696	130.241	23.748	24.0285	0.00650171	0.989698	0.0198432	unchanged	-0.409667	0.194245	0.849307	unchanged	0.416169	0.445129	0.481553	unchanged	-0.225351	C4H9NO4	134.046	0.663383	C06056	Vitamin B6 metabolism(ko00750)	--	--	--	--	--	--	--	--	--	--	--
neg_1032	Sulfolithocholic acid	1.39272e-08	1.39272e-08	1.39272e-08	1.39272e-08	1.39272e-08	1.39272e-08	1.39272e-08	1.39272e-08	1.39272e-08	1.39272e-08	1.39272e-08	1.39272e-08	1.39272e-08	1.39272e-08	1.39272e-08	1.39272e-08	1.39272e-08	0	1	0	unchanged	0	1	0	unchanged	0	1	0	unchanged	1.90948	C24H40O6S	501.254	0.656233	--	--	--	--	--	--	HMDB0000907	34669-57-3	Organic compounds	Lipids and lipid-like molecules	Steroids and steroid derivatives	Bile acids, alcohols and derivatives	Animals
neg_1034	Marinobufagenin	1.39272e-08	1.39272e-08	1.39272e-08	1.39272e-08	1.39272e-08	12.5219	20.205	1.39272e-08	1.39272e-08	152.044	1.39272e-08	48.7479	1.39272e-08	41.8739	1.39272e-08	1.39272e-08	93.3444	31.0359	0.104734	1.17512	unchanged	31.0422	0.264117	0.688733	unchanged	-0.0062995	0.996413	0.0490672	unchanged	0.0832255	C24H32O5	799.443	0.656233	--	--	--	--	--	--	HMDB0254337	470-42-8	Organic compounds	Lipids and lipid-like molecules	Steroids and steroid derivatives	Steroid lactones	Animals
neg_1035	Etamucine	100.962	1.39272e-08	1.39272e-08	1.39272e-08	1.39272e-08	63.3919	1.39272e-08	1.39272e-08	1.39272e-08	1.39272e-08	1.39272e-08	142.175	100.619	8.95989	0.170855	1.39272e-08	1.39272e-08	1.05614	0.522024	0.450142	unchanged	-0.934481	0.687139	0.253554	unchanged	1.99062	0.297555	0.686329	unchanged	-4.64707	C33H54N2O23	867.282	0.663383	--	--	--	--	--	--	HMDB0251987	--	Organic compounds	Phenylpropanoids and polyketides	Stilbenes	_	Animals
neg_1041	Valylglutamine	394.441	612.785	342.304	424.398	769.033	404.253	592.229	613.159	583.343	609.783	622.741	235.718	138.719	552.056	258.989	238.271	511.201	-0.657244	0.112217	1.25038	unchanged	0.166774	0.500599	0.487505	unchanged	-0.824019	0.0132201	1.4109	down	-0.679463	C10H19N3O4	244.13	0.670533	--	--	--	--	--	--	HMDB0029125	42854-54-6	Organic compounds	Organic acids and derivatives	Carboxylic acids and derivatives	Amino acids, peptides, and analogues	Animals
neg_1052	Carboxyethyl-hydroxychroman	6830.55	7005.09	8274.9	5829.14	6619.1	7558.44	7307.66	7040.19	6545.17	7048.41	6691.66	6395.82	6324	6733.57	5025.75	5121.01	4442.27	-0.284753	0.0508951	1.55347	unchanged	0.0248665	0.787991	0.0991811	unchanged	-0.309619	0.0138901	1.39122	down	2.67152	C12H14O4	243.064	0.684833	--	--	--	--	--	--	HMDB0249658	--	Organic compounds	Organoheterocyclic compounds	Benzopyrans	1-benzopyrans	Animals
neg_1055	S-Methylmethionine	340.265	325.597	201.297	144.904	157.761	151.855	128.102	109.173	110.346	144.399	232.12	146.37	212.262	118.026	103.305	65.1098	133.425	-0.85056	0.065898	1.49345	unchanged	-0.680331	0.105035	1.05284	unchanged	-0.170229	0.566323	0.34092	unchanged	-2.33823	C6H14NO2S+	387.162	0.684833	--	--	--	--	--	--	HMDB0038670	13065-25-3	Organic compounds	Organic acids and derivatives	Carboxylic acids and derivatives	Amino acids, peptides, and analogues	Animals
neg_1058	BETA-AMANITIN	1.39272e-08	1.39272e-08	1.39272e-08	1.39272e-08	1.39272e-08	1.39272e-08	1.39272e-08	1.39272e-08	1.39272e-08	1.39272e-08	1.39272e-08	1.39272e-08	1.39272e-08	1.39272e-08	1.39272e-08	1.39272e-08	1.39272e-08	0	1	0	unchanged	0	1	0	unchanged	0	1	0	unchanged	10.1088	C39H53N9O15S	940.322	0.677683	--	--	--	--	--	--	HMDB0249096	--	Organic compounds	Organic acids and derivatives	Carboxylic acids and derivatives	Amino acids, peptides, and analogues	Animals
neg_1060	Sulfate	75334.5	67426.9	106674	72936.9	87930.9	103405	102305	99328.6	92954.8	93008	95010.9	92859.3	115362	94759.6	80690.5	83465.3	76061.1	0.141752	0.377081	0.673654	unchanged	0.251207	0.0892793	1.07076	unchanged	-0.109455	0.283542	0.653458	unchanged	21.4884	H2O4S	96.9622	0.684833	C00059	Purine metabolism(ko00230);;Monobactam biosynthesis(ko00261);;Cysteine and methionine metabolism(ko00270);;Sulfur metabolism(ko00920);;Metabolic pathways(ko01100);;ABC transporters(ko02010)	--	--	--	--	HMDB0001448	14808-79-8	Inorganic compounds	Homogeneous non-metal compounds	Non-metal oxoanionic compounds	Non-metal sulfates	Animals,Plants
neg_1063	Valylthreonine	1136.88	606.12	906.363	252.652	493.825	639.833	505.944	470.889	420.779	446.391	474.944	306.844	173.547	312.898	86.434	104.191	403.997	-1.55389	0.041991	1.7725	down	-0.461801	0.301065	0.756952	unchanged	-1.09209	0.00256112	1.5528	down	-4.14606	C9H18N2O4	217.118	0.698433	--	--	--	--	--	--	HMDB0029137	72636-02-3	Organic compounds	Organic acids and derivatives	Carboxylic acids and derivatives	Amino acids, peptides, and analogues	Animals
neg_1076	Maleic acid	1760.88	1283.01	2108.95	819.678	1565.51	1573.42	1675.47	1573.16	1274.7	1484	1500.58	1339.26	858.363	1061.88	896.938	434.258	679.534	-0.779357	0.0436794	1.6947	down	0.00567911	0.980056	0.0363811	unchanged	-0.785036	0.00268955	1.56842	down	15.0252	C4H4O4	115.005	0.705583	--	--	--	--	--	--	--	--	--	--	--	--	--
neg_1077	5-Aminopentanoate	890.454	921.028	912.965	339.826	389.405	872.636	797.149	873.317	708.1	692.578	713.35	773.475	1052.98	892.882	730.057	715.038	868.623	0.280267	0.346708	0.86328	unchanged	0.168273	0.564897	0.289871	unchanged	0.111994	0.340796	0.605179	unchanged	13.0439	C5H11NO2	116.073	0.712733	C00431	Lysine degradation(ko00310);;Arginine and proline metabolism(ko00330);;D-Amino acid metabolism(ko00470);;Metabolic pathways(ko01100)	LMFA01100040	Fatty Acyls [FA]	Fatty Acids and Conjugates [FA01]	Amino fatty acids [FA0110]	HMDB0003355	660-88-8	Organic compounds	Organic acids and derivatives	Carboxylic acids and derivatives	Amino acids, peptides, and analogues	Animals,Plants
neg_1079	L-Malic acid	4631.61	3370.31	5752.91	2846.44	4697.01	4779.14	4690.19	4306.81	3891.24	4277.27	4247.63	3759.75	2684.04	2758.12	2494.38	1457.58	2185.1	-0.73657	0.0267523	1.81004	down	0.0353708	0.851576	0.0925835	unchanged	-0.77194	0.00113143	1.64631	down	14.0026	C4H6O5	133.016	0.705583	C00149	Citrate cycle (TCA cycle)(ko00020);;Pyruvate metabolism(ko00620);;Glyoxylate and dicarboxylate metabolism(ko00630);;Metabolic pathways(ko01100);;Carbon metabolism(ko01200);;Taste transduction(ko04742);;Glucagon signaling pathway(ko04922);;Proximal tubule bicarbonate reclamation(ko04964);;Pathways in cancer(ko05200);;Renal cell carcinoma(ko05211);;Central carbon metabolism in cancer(ko05230)	--	--	--	--	HMDB0000156	97-67-6	Organic compounds	Organic acids and derivatives	Hydroxy acids and derivatives	Beta hydroxy acids and derivatives	Microbe,Animals
neg_1081	5-Aminopentanal	1580.62	2466.83	5240.98	609.239	2904.89	4851.43	4712.67	4421.48	4273.63	4679.74	4323.27	5110.66	1869.96	3702.61	4417.38	3306.29	2527.02	0.446374	0.345537	0.710995	unchanged	0.827435	0.0626682	1.16609	unchanged	-0.38106	0.0830291	1.05698	unchanged	-9.37883	C5H11NO	146.081	0.712733	C12455	Lysine degradation(ko00310);;Metabolic pathways(ko01100)	--	--	--	--	HMDB0012815	--	Organic compounds	Organic oxygen compounds	Organooxygen compounds	Carbonyl compounds	Animals
neg_1083	Amyl 2-furoate	297.211	318.484	553.244	210.343	369.456	513.172	482.771	463.438	470.594	494.762	456.19	485.733	409.111	385.382	386.501	360.214	338.642	0.172847	0.495665	0.520531	unchanged	0.457184	0.0835315	1.09039	unchanged	-0.284338	0.00721121	1.46755	down	-2.01342	C10H14O3	203.069	0.712733	--	--	--	--	--	--	HMDB0029456	4996-48-9	Organic compounds	Organoheterocyclic compounds	Furans	Furoic acid and derivatives	Animals
neg_1088	5-(3',5'-Dihydroxyphenyl)-gamma-valerolactone-O-sulphate-O-methyl	1334.99	1085	1715.3	780.369	1253.43	1120.56	1151.29	1031.09	904.683	908.198	944.616	1014.82	562.144	641.684	664.091	216.603	471.049	-1.05201	0.0102045	1.9436	down	-0.28867	0.223736	0.869117	unchanged	-0.76334	0.00966402	1.41912	down	-2.71783	C12H14O7S	323.02	0.712733	--	--	--	--	--	--	HMDB0060031	--	Organic compounds	Organic acids and derivatives	Organic sulfuric acids and derivatives	Arylsulfates	Animals
neg_1102	Uric acid	29740.3	25184.7	76473.7	16447.8	16174.9	17258.3	17573	15646.1	14800.2	15680.6	14745.3	11604.8	13493.6	8036.12	10453.2	7413.23	12225.8	-1.63831	0.118186	1.5114	unchanged	-1.04028	0.207626	0.945985	unchanged	-0.598036	0.00143894	1.6102	down	-2.68541	C5H4N4O3	167.021	0.719883	C00366	Purine metabolism(ko00230);;Metabolic pathways(ko01100);;Bile secretion(ko04976)	--	--	--	--	HMDB0000289	69-93-2	Organic compounds	Organoheterocyclic compounds	Imidazopyrimidines	Purines and purine derivatives	Microbe,Animals,Plants
neg_1111	3-Oxopropanoate	3241.84	3324.93	2486.1	2330.87	2876.54	2850.97	2827.04	2907	2486.62	2554.61	2767.15	3566.39	2517.36	3343.83	2471.7	1706.04	2598.82	-0.0786731	0.665031	0.419097	unchanged	-0.0619213	0.592457	0.387979	unchanged	-0.0167518	0.914983	0.0427425	unchanged	25.2735	C3H4O3	87.011	0.719883	C00222	Pyrimidine metabolism(ko00240);;beta-Alanine metabolism(ko00410);;Inositol phosphate metabolism(ko00562);;Propanoate metabolism(ko00640);;Metabolic pathways(ko01100);;Carbon metabolism(ko01200)	--	--	--	--	HMDB0011111	926-61-4	Organic compounds	Organic oxygen compounds	Organooxygen compounds	Carbonyl compounds	Animals
neg_1113	2-Methyl-3-oxopropanoic acid	1568.64	1276.39	1282.12	1425.46	1291.78	1427.13	1534.35	1321.86	1302.19	1373.65	1360.76	1193.99	1377.91	1065.93	1254.15	936.621	1013.21	-0.263578	0.0291427	1.54772	down	0.0186163	0.797696	0.218495	unchanged	-0.282195	0.0126507	1.36463	down	21.2374	C4H6O3	101.027	0.734183	--	--	--	--	--	--	--	--	--	--	--	--	--
neg_1125	2-O-Galloyl-1,4-galactarolactone	14270.2	19040.3	6953.78	7979.44	9551.69	11248.9	10643.8	11415.2	10260.2	10751.2	12684	14980.5	9149.8	12494.8	10302.4	4789.95	6793.2	-0.24529	0.526049	0.542751	unchanged	-0.0497532	0.871425	0.150529	unchanged	-0.195537	0.400636	0.503519	unchanged	-1.41324	C13H12O11	365.012	0.734183	--	--	--	--	--	--	HMDB0037199	--	Organic compounds	Benzenoids	Benzene and substituted derivatives	Benzoic acids and derivatives	Animals
neg_1126	6-hydroxymethyl-dihydropterin diphosphate	12634.2	13938.4	8864.58	9413.31	10416.7	10504.1	10195.5	9573.44	10059.9	10985.9	11416.6	11253.4	8568.65	9661.49	9930.28	5633.99	6967.9	-0.350513	0.0982485	1.28621	unchanged	-0.0801768	0.57981	0.391076	unchanged	-0.270336	0.0903112	1.01939	unchanged	1.23686	C7H8N5O8P2-3	386.994	0.727033	--	--	--	--	--	--	--	--	--	--	--	--	--
neg_1127	1,7-Diphospho-1-epi-valienol	17328	13620.4	27569.6	18067.4	14432.5	13492.1	14491	12248.4	13269.9	14212.2	12447.7	10013.1	10301.5	8423.1	12055.7	8962.88	9674.89	-0.877963	0.027367	1.93148	down	-0.446279	0.123365	1.07431	unchanged	-0.431684	0.000390487	1.66752	down	25.7762	C7H14O11P2	356.984	0.734183	--	--	--	--	--	--	--	--	--	--	--	--	--
neg_1133	dUTP	68369.9	44100.2	30225.6	24006.8	37638.2	56337.9	54719.4	37223.9	24122.1	24911.8	38144.6	65372.4	33035.8	39846.6	20546.5	16054	30873.4	-0.253269	0.546134	0.58866	unchanged	-0.0585316	0.869192	0.110169	unchanged	-0.194737	0.59993	0.289169	unchanged	20.0874	C9H15N2O14P3	502.912	0.727033	C00460	Pyrimidine metabolism(ko00240);;Metabolic pathways(ko01100);;Nucleotide metabolism(ko01232)	--	--	--	--	HMDB0001191	1173-82-6	Organic compounds	Nucleosides, nucleotides, and analogues	Pyrimidine nucleotides	Pyrimidine deoxyribonucleotides	Microbe,Animals
neg_1152	Cephamycin C	19.7313	15.8136	105.132	35.3191	16.4989	16.9074	46.6264	47.075	20.3535	36.0267	30.5982	3.24503	24.3756	27.1082	29.7074	13.8942	4.86391	-1.16249	0.286181	1.035	unchanged	-0.225363	0.767853	0.261033	unchanged	-0.937126	0.0493877	1.10793	down	19.4425	C16H22N4O9S	467.094	0.741333	--	--	--	--	--	--	HMDB0249812	--	Organic compounds	Organoheterocyclic compounds	Lactams	Beta lactams	Animals
neg_1158	Asp-Tyr-Met-Gly-Trp-Met-Asp-Phe-NH2	1.39272e-08	1.39272e-08	1.39272e-08	1.39272e-08	1.39272e-08	1.39272e-08	1.39272e-08	1.39272e-08	1.39272e-08	1.39272e-08	1.39272e-08	1.39272e-08	1.39272e-08	1.39272e-08	1.39272e-08	1.39272e-08	1.39272e-08	0	1	0	unchanged	0	1	0	unchanged	0	1	0	unchanged	4.82971	C49H62N10O13S2	1107.4	0.748483	--	--	--	--	--	--	HMDB0248663	--	_	_	_	_	Animals
neg_1159	3-Hydroxynorvaline	89.6566	107.123	52.5237	1.64876	23.5191	133.958	143.649	116.221	114.231	99.8482	98.7884	117.721	50.5797	101.406	36.9094	23.0733	34.2182	0.14388	0.826176	0.118911	unchanged	1.1014	0.0295778	1.25905	up	-0.957517	0.0141616	1.36999	down	2.87042	C5H11NO3	132.067	0.748483	--	--	--	--	--	--	HMDB0244983	2280-42-4	Organic compounds	Organic acids and derivatives	Carboxylic acids and derivatives	Amino acids, peptides, and analogues	Animals,Plants
neg_1163	Perillyl aldehyde	1.39272e-08	1.39272e-08	9.9587	1.39272e-08	1.39272e-08	1.39272e-08	1.39272e-08	1.39272e-08	1.39272e-08	1.39272e-08	1.39272e-08	1.39272e-08	1.39272e-08	1.39272e-08	5.00334	1.39272e-08	1.39272e-08	-1.2561	0.61318	0.494694	unchanged	-27.0915	0.373901	0.694701	unchanged	25.8354	0.363217	0.602438	unchanged	-2.62239	C10H14O	345.206	0.748483	C02576		LMPR0102090010	Prenol Lipids [PR]	Isoprenoids [PR01]	C10 isoprenoids (monoterpenes) [PR0102]	HMDB0003647	2111-75-3	Organic compounds	Lipids and lipid-like molecules	Prenol lipids	Monoterpenoids	Animals
neg_1170	Hypoxanthine	26531.7	21350.1	17685.1	30344.1	30643.6	28984.9	28686.2	26815	25097.6	26212	25620.8	23732.4	25481.2	17048.6	16249.3	18702.8	36909.9	-0.13683	0.586158	0.441151	unchanged	0.0879934	0.573158	0.499972	unchanged	-0.224823	0.278884	0.685856	unchanged	12.796	C5H4N4O	135.033	0.762783	C00262	Purine metabolism(ko00230);;Metabolic pathways(ko01100);;Nucleotide metabolism(ko01232)	--	--	--	--	HMDB0000157	68-94-0	Organic compounds	Organoheterocyclic compounds	Imidazopyrimidines	Purines and purine derivatives	Microbe,Animals,Plants
neg_1201	Glycylserylprolylmethionylphenylalanylvalinamide	1.39272e-08	0.139312	0.320157	1.39272e-08	1.39272e-08	1.39272e-08	1.25035	1.39272e-08	3.79628	1.39272e-08	1.39272e-08	1.39272e-08	0.127601	0.356582	1.39272e-08	1.39272e-08	0.0403548	-0.0719563	0.959433	0.100715	unchanged	3.19425	0.28571	0.583894	unchanged	-3.2662	0.282967	0.713178	unchanged	-1.86858	C29H45N7O7S	670.278	0.762783	--	--	--	--	--	--	HMDB0033242	115525-98-9	Organic compounds	Organic acids and derivatives	Carboxylic acids and derivatives	Amino acids, peptides, and analogues	Animals
neg_1208	Hydroxyproline	1282.54	1070.89	1182.98	826.073	823.267	1381.93	1431.45	1298.38	1061.35	1147.32	1071.95	1122.58	2154.05	1024.77	1013.12	881.287	657.027	0.139114	0.665267	0.381416	unchanged	0.24845	0.127507	0.856585	unchanged	-0.109336	0.700404	0.219754	unchanged	8.65226	C5H9NO3	130.052	0.769933	C01015	--	--	--	--	--	HMDB0240251	618-27-9	Organic compounds	Organic acids and derivatives	Carboxylic acids and derivatives	Amino acids, peptides, and analogues	Animals
neg_1211	N-Formyl-L-glutamate	3038.31	3096.73	2662.12	1702.92	2381.73	3687.97	3392.35	3301.51	2838.34	3019.71	3225.61	3934.56	3281.79	3080.58	2906.32	2145.3	1728.34	0.143676	0.530019	0.463957	unchanged	0.33255	0.0569115	1.09767	unchanged	-0.188875	0.292573	0.615922	unchanged	2.15295	C6H9NO5	174.041	0.769933	C01045	Histidine metabolism(ko00340);;Metabolic pathways(ko01100)	--	--	--	--	HMDB0003470	1681-96-5	Organic compounds	Organic acids and derivatives	Carboxylic acids and derivatives	Amino acids, peptides, and analogues	Animals
neg_1214	7-Methyl-2-(2-furyl)-1,8-naphthyridine-4(1H)-one	726.841	683.172	704.54	677.41	891.256	636.053	974.032	701.76	595.007	711.211	573.621	517.162	430.607	529.163	399.795	386.703	1129.31	-0.381549	0.208928	0.999158	unchanged	-0.076471	0.608679	0.242966	unchanged	-0.305078	0.336966	0.611231	unchanged	-0.33954	C13H10N2O2	247.049	0.769933	--	--	--	--	--	--	HMDB0247633	--	Organic compounds	Organoheterocyclic compounds	Diazanaphthalenes	Naphthyridines	Animals
neg_122	Nitrous oxide	10.7169	14.7994	38.9294	1.88791	2.63876	2.28771	5.90308	7.25542	0.541916	1.08436	1.67857	3.10715	10.1744	4.01924	15.8156	0.0324314	16.5335	-0.736319	0.482335	0.64971	unchanged	-2.14208	0.189721	0.981226	unchanged	1.40576	0.138209	0.930454	unchanged	12.1525	N2O	86.9959	0.526617	C00887	Nitrogen metabolism(ko00910);;Metabolic pathways(ko01100)	--	--	--	--	HMDB0035807	10024-97-2	Inorganic compounds	Homogeneous non-metal compounds	Other non-metal organides	Other non-metal nitrides	Animals
neg_1221	Glucosaminylmuramyl-2-alanine-D-isoglutamine	13.4625	0.606549	9.57153	1.39272e-08	4.81218	3.86445	1.1843	0.1771	3.39338	4.01598	5.51399	7.26734	1.39272e-08	3.1749	1.39272e-08	1.39272e-08	1.39272e-08	-1.70917	0.219387	1.19023	unchanged	-0.911694	0.373345	0.613486	unchanged	-0.797475	0.403728	0.516104	unchanged	17.1273	C25H43N5O15	688.256	0.769933	--	--	--	--	--	--	HMDB0259500	--	Organic compounds	Organic acids and derivatives	Carboxylic acids and derivatives	Amino acids, peptides, and analogues	Animals
neg_1226	lipiarmycin a4	1.39272e-08	1.39272e-08	1.39272e-08	1.39272e-08	1.39272e-08	1.39272e-08	1.39272e-08	1.39272e-08	1.39272e-08	1.39272e-08	1.39272e-08	1.39272e-08	1.39272e-08	1.39272e-08	1.39272e-08	1.39272e-08	1.39272e-08	0	1	0	unchanged	0	1	0	unchanged	0	1	0	unchanged	-0.930246	C51H72Cl2O18	1077.39	0.784233	--	--	--	--	--	--	HMDB0254114	--	Organic compounds	Phenylpropanoids and polyketides	Macrolides and analogues	_	Animals
neg_1240	URANTIDE	28.3064	1.39272e-08	1.39272e-08	1.39272e-08	1.39272e-08	8.27303	1.39272e-08	1.39272e-08	1.39272e-08	1.39272e-08	1.39272e-08	17.615	29.7493	1.39272e-08	1.39272e-08	1.39272e-08	1.39272e-08	0.479638	0.778897	0.233331	unchanged	-2.03767	0.499027	0.450855	unchanged	2.51731	0.276261	0.715987	unchanged	-18.2357	C51H66N10O12S2	1109.38	0.784233	--	--	--	--	--	--	HMDB0259711	--	Organic compounds	Organic acids and derivatives	Carboxylic acids and derivatives	Amino acids, peptides, and analogues	Animals
neg_1247	1-Methylpyrrolinium	325.15	236.997	188.844	142.033	120.658	210.331	182.841	164.44	118.754	144.975	162.919	166.188	183.331	144.479	126.227	133.091	152.927	-0.424669	0.23435	1.08874	unchanged	-0.305524	0.364177	0.643882	unchanged	-0.119144	0.422528	0.461151	unchanged	-0.3659	C5H10N+	119.051	0.784233	C06178	Nicotinate and nicotinamide metabolism(ko00760);;Metabolic pathways(ko01100)	--	--	--	--	HMDB0060253	--	Organic compounds	Organoheterocyclic compounds	Pyrrolines	_	Animals,Plants
neg_1252	Deoxyribose	3885.08	12449.6	4715.65	17538.1	13495.8	29380	28986.7	27209.7	24373.1	25542.5	24968.8	17884.1	13095	21192.2	8278.16	18651.5	31730.2	0.826408	0.086731	1.26695	unchanged	1.36027	0.00223344	1.6444	up	-0.533857	0.0511034	1.20433	unchanged	-8.07491	C5H10O4	267.075	0.784233	C01801	--	--	--	--	--	HMDB0003224	533-67-5	Organic compounds	Organic oxygen compounds	Organooxygen compounds	Carbohydrates and carbohydrate conjugates	Animals
neg_1257	Xanthine	8813.95	13856.2	65604.7	6265.91	5323.18	5563.96	5372.48	4917.18	4465.19	4722.4	4637.45	3752.54	4778.91	2207.23	4479.24	2948.84	4274.04	-2.41687	0.231124	1.20469	unchanged	-2.01357	0.261543	0.85889	unchanged	-0.403303	0.0296352	1.23349	down	11.8028	C5H4N4O2	151.028	0.777083	C00385	Purine metabolism(ko00230);;Caffeine metabolism(ko00232);;Metabolic pathways(ko01100);;Nucleotide metabolism(ko01232)	--	--	--	--	HMDB0000292	69-89-6	Organic compounds	Organoheterocyclic compounds	Imidazopyrimidines	Purines and purine derivatives	Microbe,Animals,Plants
neg_126	Imidazotetrazine	271.564	140.033	403.927	128.256	141.562	304.946	277.926	257.272	202.022	221.298	226.714	278.978	307.231	219.868	349.504	199.722	261.818	0.312242	0.40536	0.714196	unchanged	0.1943	0.600987	0.28709	unchanged	0.117943	0.46266	0.505229	unchanged	10.6987	C3H2N6	157.005	0.5409	--	--	--	--	--	--	HMDB0253424	--	Organic compounds	Organoheterocyclic compounds	Tetrazines	_	Animals
neg_1262	4,6,7-Trihydroxy-1,2,3,4-tetrahydroisoquinoline	8860.89	5338.44	4810.24	3240.31	3107.5	4002.78	3913.98	3512.52	3164.25	3335.65	3225.03	3197.88	4087.7	2768.43	2735.97	3288.81	3514.28	-0.635098	0.159037	1.27919	unchanged	-0.524497	0.21306	0.878868	unchanged	-0.110601	0.328913	0.582995	unchanged	7.1067	C9H11NO3	180.068	0.784233	--	--	--	--	--	--	HMDB0060280	--	Organic compounds	Organoheterocyclic compounds	Tetrahydroisoquinolines	_	Animals
neg_1265	3-Dehydroquinic acid	12292	10745.4	12600.8	9733.97	12603.2	17506.8	17164.5	15516.9	13682.4	14457.2	14369.6	16240.5	12432.2	11875.6	9699.75	10530.3	10818.7	0.0414247	0.768921	0.0841385	unchanged	0.414052	0.0015987	1.47006	up	-0.372628	0.0137807	1.31726	down	11.2608	C7H10O6	189.043	0.784233	C00944	Phenylalanine, tyrosine and tryptophan biosynthesis(ko00400);;Metabolic pathways(ko01100);;Biosynthesis of amino acids(ko01230)	--	--	--	--	HMDB0012710	10534-44-8	Organic compounds	Organic acids and derivatives	Hydroxy acids and derivatives	Alpha hydroxy acids and derivatives	Microbe,Animals
neg_127	Dihydroclavaminic acid	1840.56	1487.75	3485.52	1207.17	1328.16	1385.17	1310.33	1285.42	1189.18	1257.4	1245.75	1499.06	1918.77	1193.33	913.725	997.697	1221.42	-0.534792	0.248515	1.12228	unchanged	-0.548035	0.230303	0.902753	unchanged	0.0132432	0.941365	0.067308	unchanged	-4.90824	C8H12N2O4	199.071	0.5409	--	--	--	--	--	--	--	--	--	--	--	--	--
neg_1272	dioxybenzone	3205.91	3887.61	5003.65	7031.77	3630.27	8825.44	8568.71	7881.98	7067.84	7734.79	8029.99	6298.64	16067.8	4163.58	9278.22	12383.9	3302.32	0.914933	0.10813	1.30407	unchanged	0.816814	0.00495171	1.55083	up	0.0981187	0.793379	0.186755	unchanged	2.78225	C14H12O4	243.067	0.777083	C14283	--	--	--	--	--	HMDB0251439	--	Organic compounds	Benzenoids	Benzene and substituted derivatives	Benzophenones	Animals
neg_1273	TETRAHYDROURIDINE	504.496	384.295	289.438	258.703	313.67	367.973	263.396	260.461	232.089	296.254	218.872	319.363	229.996	180.651	193.179	177.795	408.261	-0.477058	0.125757	1.22897	unchanged	-0.35803	0.167597	0.865931	unchanged	-0.119028	0.635691	0.290978	unchanged	-10.4044	C9H16N2O6	247.091	0.784233	--	--	--	--	--	--	HMDB0258911	--	Organic compounds	Nucleosides, nucleotides, and analogues	Pyrimidine nucleosides	_	Animals
neg_1275	Olprinone	893.286	705.899	813.47	624.42	717.966	1037.01	986.612	1015.92	785.353	815	881.875	819.297	889.119	739.926	865.025	482.548	512.832	-0.0645945	0.713268	0.29424	unchanged	0.293267	0.0273215	1.15086	up	-0.357862	0.0440047	1.11564	down	-3.77442	C14H10N4O	271.059	0.777083	--	--	--	--	--	--	HMDB0255959	--	Organic compounds	Organoheterocyclic compounds	Pyridines and derivatives	Bipyridines and oligopyridines	Animals
neg_1276	Carmofur	3214.22	2820.88	3981.82	2096.28	2490.43	2822.04	2676.71	2547.65	2097.21	2365.48	2202.07	2542.17	2057.32	2118.67	1743.95	1797.79	2722.49	-0.432806	0.0812461	1.54936	unchanged	-0.25245	0.229481	0.86335	unchanged	-0.180356	0.178718	0.793473	unchanged	5.83319	C11H16FN3O3	292.088	0.784233	C13252	Drug metabolism - other enzymes(ko00983)	--	--	--	--	HMDB0249685	--	Organic compounds	Organoheterocyclic compounds	Diazines	Pyrimidines and pyrimidine derivatives	Animals
neg_1282	N-Malonyltryptophan	654.422	537.126	934.496	493.581	564.173	861.156	845.014	758.817	679.938	839.203	742.61	909.257	953.566	932.237	645.235	413.393	382.807	0.149088	0.616498	0.313914	unchanged	0.307062	0.131725	0.922511	unchanged	-0.157974	0.492733	0.4213	unchanged	-3.24443	C14H14N2O5	311.064	0.777083	--	--	--	--	--	--	--	--	--	--	--	--	--
neg_1284	Myo-inositol glutamate	761.205	620.284	766.384	398.141	614.49	587.798	571.884	574.769	498.271	455.355	397.636	567.588	356.732	455.004	317.246	270.564	544.112	-0.594785	0.0348659	1.69722	down	-0.297585	0.165032	0.932821	unchanged	-0.297201	0.14239	0.863075	unchanged	-5.74322	C11H17NO10	322.076	0.777083	--	--	--	--	--	--	HMDB0254974	--	Organic compounds	Organic acids and derivatives	Carboxylic acids and derivatives	Amino acids, peptides, and analogues	Animals
neg_1288	EMycin E	4810.65	2935.62	3691.25	2825.37	2736.31	3183.67	2969.04	2685.09	2466.83	2869.87	2923.12	2531.9	2774.25	1807.12	2069.59	2061.35	2467.04	-0.573141	0.0433843	1.71438	down	-0.254704	0.236986	0.81165	unchanged	-0.318437	0.0120523	1.34169	down	-2.4104	C19H18O4	331.094	0.784233	--	--	--	--	--	--	HMDB0251782	--	Organic compounds	Benzenoids	Tetralins	_	Animals
neg_1293	8-Hydroxyguanosine	15.872	22.8274	93.7484	18.7855	10.4501	48.9243	34.9871	20.5575	9.67473	26.453	8.90303	23.1238	29.3055	28.0399	113.159	6.87336	13.1102	0.138785	0.886357	0.140779	unchanged	-0.376064	0.674591	0.348548	unchanged	0.514849	0.55358	0.397154	unchanged	-14.6899	C10H13N5O6	344.08	0.784233	--	--	--	--	--	--	HMDB0002044	3868-31-3	Organic compounds	Nucleosides, nucleotides, and analogues	Purine nucleosides	_	Animals
neg_1298	Marmesin galactoside	1435.35	1099.34	1232.19	1321.33	978.959	1068.21	1054.3	995.789	801.275	963.821	1105.38	795.33	1027.03	640.289	768.345	567.477	859.533	-0.644346	0.00283017	1.99714	down	-0.281795	0.0552735	1.13392	unchanged	-0.362551	0.022216	1.24513	down	-3.4465	C20H24O9	443.11	0.784233	--	--	--	--	--	--	HMDB0041508	156363-69-8	Organic compounds	Phenylpropanoids and polyketides	Coumarins and derivatives	Furanocoumarins	Animals
neg_1304	Angiotensin (5-8)	458.234	228.772	284.603	136.534	147.255	238.259	182.532	174.864	121.649	162.418	139.24	231.814	163.651	109.62	106.606	122.118	122.13	-0.815599	0.140421	1.35891	unchanged	-0.56408	0.243088	0.812967	unchanged	-0.251518	0.315909	0.571261	unchanged	-43.1312	C26H36N6O5	533.227	0.784233	--	--	--	--	--	--	--	--	--	--	--	--	--
neg_1307	Gly-arg-gly-glu-ser-pro	110.37	92.6912	141.254	45.2592	35.7404	26.9464	27.8909	29.0119	4.18663	3.20989	30.6759	36.6704	1.39272e-08	65.7717	53.5056	15.914	29.7687	-1.33985	0.0597053	1.60495	unchanged	-2.06561	0.0286281	1.4184	down	0.725761	0.269312	0.69797	unchanged	-6.21917	C23H39N9O10	646.276	0.784233	--	--	--	--	--	--	HMDB0252941	--	Organic compounds	Organic acids and derivatives	Carboxylic acids and derivatives	Amino acids, peptides, and analogues	Animals
neg_131	Proxyphylline	534.19	373.177	831.296	166.065	147.416	187.482	242.369	190.967	195.732	192.916	162.627	150.524	181.134	132.772	327.652	157.298	279.032	-1.00337	0.183526	1.24228	unchanged	-1.07108	0.165837	1.02488	unchanged	0.0677068	0.792376	0.175526	unchanged	-2.77639	C10H14N4O3	259.081	0.5409	--	--	--	--	--	--	HMDB0256878	--	Organic compounds	Organoheterocyclic compounds	Imidazopyrimidines	Purines and purine derivatives	Animals
neg_1312	Egonol gentiobioside	101.455	64.6556	91.8057	55.7248	20.9119	72.2443	80.9335	69.3049	30.5844	67.8148	70.209	40.1832	35.2917	22.5058	31.7889	34.6976	54.0746	-0.87736	0.0989877	1.49338	unchanged	-0.0377653	0.917239	0.118893	unchanged	-0.839595	0.00851875	1.40432	down	-3.73934	C31H38O15	685.188	0.784233	--	--	--	--	--	--	--	--	--	--	--	--	--
neg_1322	Lividomycin A	8.14783	0.853311	1.39272e-08	8.9258	1.39272e-08	25.2986	34.1022	18.7629	16.9757	14.5275	1.39272e-08	30.4435	24.9307	1.39272e-08	1.39272e-08	1.39272e-08	1.39272e-08	1.36405	0.398437	0.5956	unchanged	2.34989	0.0240389	1.21764	up	-0.985843	0.256755	0.65942	unchanged	-15.3823	C29H55N5O18	806.341	0.784233	C17707	Neomycin, kanamycin and gentamicin biosynthesis(ko00524)	--	--	--	--	--	--	--	--	--	--	--
neg_1323	6-(2,2-Diphenylethylamino)-9-[(2r,3r,4s,5s)-5-(Ethylcarbamoyl)-3,4-Dihydroxy-Oxolan-2-Yl]-N-[2-[(1-Pyridin-2-Ylpiperidin-4-Yl)carbamoylamino]ethyl]purine-2-Carboxamide	1.39272e-08	1.39272e-08	1.39272e-08	1.39272e-08	1.39272e-08	1.39272e-08	1.39272e-08	1.39272e-08	1.39272e-08	1.39272e-08	1.39272e-08	1.39272e-08	1.39272e-08	1.39272e-08	1.39272e-08	1.39272e-08	1.39272e-08	0	1	0	unchanged	0	1	0	unchanged	0	1	0	unchanged	1.816	C40H47N11O6	822.371	0.784233	--	--	--	--	--	--	HMDB0260329	--	Organic compounds	Nucleosides, nucleotides, and analogues	Purine nucleosides	_	Animals
neg_1326	PGP(i-12:0/PGJ2)	1.36419	1.39272e-08	1.39272e-08	1.39272e-08	1.39272e-08	1.39272e-08	1.39272e-08	3.84248	1.39272e-08	0.621402	11.9186	1.39272e-08	1.39272e-08	1.39272e-08	1.39272e-08	1.39272e-08	5.72232	1.80552	0.518936	0.506346	unchanged	3.323	0.262338	0.61506	unchanged	-1.51748	0.436512	0.471119	unchanged	6.79079	C38H66O15P2	859.363	0.784233	--	--	--	--	--	--	HMDB0274817	--	_	_	_	_	Animals
neg_133	D-Glucono-1,5-lactone 6-phosphate	649.938	301.553	588.977	331.109	370.964	993.699	937.749	838.007	658.342	749.158	785.901	1024.49	1088.12	754.2	824.123	780.558	785.364	0.96603	0.00155305	2.0386	up	0.883002	0.00290358	1.47027	up	0.0830284	0.539562	0.429832	unchanged	12.3853	C6H11O9P	292.987	0.5409	C01236	Pentose phosphate pathway(ko00030);;Metabolic pathways(ko01100);;Carbon metabolism(ko01200)	--	--	--	--	HMDB0001127	2641-81-8	Organic compounds	Organic oxygen compounds	Organooxygen compounds	Carbohydrates and carbohydrate conjugates	Microbe,Animals
neg_1360	4-Pyridoxate	756.737	595.703	840.52	407.698	479.46	838.023	784.409	720.322	577.134	593.083	594.978	750.553	782.947	787.8	534.532	413.458	515.281	0.0341103	0.8918	0.030404	unchanged	0.152398	0.488451	0.371294	unchanged	-0.118288	0.520526	0.373792	unchanged	11.097	C8H9NO4	182.048	0.791383	C00847	Vitamin B6 metabolism(ko00750);;Metabolic pathways(ko01100)	--	--	--	--	HMDB0000017	82-82-6	Organic compounds	Organoheterocyclic compounds	Pyridines and derivatives	Pyridinecarboxylic acids and derivatives	Animals
neg_1369	2',4-Dihydroxy-4',6'-dimethoxychalcone	334.003	241.692	343.165	266.194	262.361	734.251	720.996	634.971	537.086	571.364	510.791	381.092	579.674	511.081	324.001	276.767	238.994	0.412383	0.150918	1.08151	unchanged	1.0947	9.57992e-05	1.64363	up	-0.682312	0.00708424	1.41848	down	-8.41088	C17H16O5	335.067	0.791383	--	--	LMPK12120320	Polyketides [PK]	Flavonoids [PK12]	Chalcones and dihydrochalcones [PK1212]	HMDB0030875	37308-75-1	Organic compounds	Phenylpropanoids and polyketides	Linear 1,3-diarylpropanoids	Chalcones and dihydrochalcones	Animals,Plants
neg_1371	2,5-Diamino-6-(5-phospho-D-ribitylamino)pyrimidin-4(3H)-one	830.315	503.741	766.269	469.346	450.152	1292.89	1141.52	1008.9	910.468	937.052	939.062	703.848	833.978	648.55	502.153	311.981	203.363	-0.177681	0.595786	0.481576	unchanged	0.781711	0.00273513	1.45283	up	-0.959392	0.0022185	1.54281	down	23.427	C9H18N5O8P	376.136	0.791383	C18910	Riboflavin metabolism(ko00740);;Metabolic pathways(ko01100);;Biosynthesis of cofactors(ko01240)	--	--	--	--	HMDB0304043	--	Organic compounds	Organic oxygen compounds	Organooxygen compounds	Carbohydrates and carbohydrate conjugates	Microbe,Animals
neg_1372	Stemmadenine	54.0107	48.1103	42.3817	42.3597	32.1698	60.8039	52.9424	44.8029	31.9385	47.4871	38.6967	56.9054	56.9568	21.4822	33.1552	36.9137	29.3107	-0.163212	0.522898	0.518914	unchanged	0.0739966	0.686178	0.231216	unchanged	-0.237209	0.364254	0.519175	unchanged	9.56654	C21H26N2O3	389.167	0.791383	--	--	--	--	--	--	--	--	--	--	--	--	--
neg_1373	Flurbiprofen glucuronide	1246.3	840.017	857.441	571.064	525.028	642.048	590.893	630.746	518.084	596.559	578.732	636.645	462.956	446.148	380.95	434.848	593.838	-0.713992	0.0689473	1.61902	unchanged	-0.446652	0.170744	0.971145	unchanged	-0.26734	0.0597579	1.09812	unchanged	3.30338	C21H21FO8	441.098	0.791383	--	--	--	--	--	--	HMDB0060918	--	Organic compounds	Organic oxygen compounds	Organooxygen compounds	Carbohydrates and carbohydrate conjugates	Animals
neg_1389	Crustacean Cardioactive Peptide	1.39272e-08	1.39272e-08	1.39272e-08	1.39272e-08	1.39272e-08	1.39272e-08	1.39272e-08	1.39272e-08	1.39272e-08	1.39272e-08	1.39272e-08	1.39272e-08	1.39272e-08	1.39272e-08	1.39272e-08	1.39272e-08	1.39272e-08	0	1	0	unchanged	0	1	0	unchanged	0	1	0	unchanged	-0.37036	C42H57N11O11S2	954.36	0.791383	--	--	--	--	--	--	HMDB0250548	--	Organic compounds	Organic acids and derivatives	Carboxylic acids and derivatives	Amino acids, peptides, and analogues	Animals
neg_1398	L-Leucine	661.22	982.711	497.343	504.544	417.968	1094.24	1074.34	1177.06	722.718	782.777	798.617	806.634	1457.99	653.707	950.967	891.85	755.608	0.58547	0.0765369	1.45046	unchanged	0.619838	0.0332189	1.13014	up	-0.0343681	0.878145	0.0510146	unchanged	9.35965	C6H13NO2	130.089	0.798533	C00123	Valine, leucine and isoleucine degradation(ko00280);;Valine, leucine and isoleucine biosynthesis(ko00290);;Aminoacyl-tRNA biosynthesis(ko00970);;Metabolic pathways(ko01100);;2-Oxocarboxylic acid metabolism(ko01210);;Biosynthesis of amino acids(ko01230);;ABC transporters(ko02010);;mTOR signaling pathway(ko04150);;Protein digestion and absorption(ko04974);;Mineral absorption(ko04978);;Shigellosis(k…	--	--	--	--	HMDB0000687	61-90-5	Organic compounds	Organic acids and derivatives	Carboxylic acids and derivatives	Amino acids, peptides, and analogues	Microbe,Animals
neg_141	Ochratoxin B	1.39272e-08	1.39272e-08	4.34194	1.39272e-08	1.39272e-08	1.39272e-08	1.39272e-08	1.39272e-08	1.39272e-08	1.39272e-08	1.39272e-08	0.0645509	1.39272e-08	1.39272e-08	1.39272e-08	1.39272e-08	1.39272e-08	-6.33479	0.37927	0.929372	unchanged	-25.8939	0.373901	0.694701	unchanged	19.5591	0.363217	0.616194	unchanged	-0.887518	C20H19NO6	368.114	0.5409	--	--	--	--	--	--	--	--	--	--	--	--	--
neg_1415	Ascladiol	104259	104502	144201	89925.7	129595	109780	106361	98604.1	93276.8	98742.6	93664	104480	55155.4	95726	61394.5	59445	125984	-0.452049	0.0772731	1.44801	unchanged	-0.194278	0.219775	0.852784	unchanged	-0.257771	0.233197	0.760095	unchanged	-4.23456	C7H8O4	201.04	0.805683	--	--	--	--	--	--	--	--	--	--	--	--	--
neg_1418	Rhizocticin A	957.881	884.977	907.479	568.247	670.996	1143.71	985.393	887.756	799.053	920.365	826.485	772.044	839.422	956.865	726.175	500.97	594.186	-0.125161	0.52949	0.553252	unchanged	0.216531	0.197823	0.730273	unchanged	-0.341692	0.0451273	1.13406	down	2.16019	C11H22N5O6P	396.13	0.812833	C17944	Phosphonate and phosphinate metabolism(ko00440)	--	--	--	--	--	--	--	--	--	--	--
neg_1424	Ethylphosphate	18370.9	18554.3	25341.4	19363.4	22915.9	22440.2	22856.3	19647	19142.7	20658.4	19923.7	21271.2	16161.4	18409.3	16185.1	16029.4	21343.6	-0.197559	0.16055	1.28239	unchanged	-0.0090771	0.934013	0.0669015	unchanged	-0.188482	0.0680318	1.06576	unchanged	9.03753	C2H7O4P	146.984	0.819983	--	--	--	--	--	--	HMDB0012228	78-40-0	Organic compounds	Organic acids and derivatives	Organic phosphoric acids and derivatives	Phosphate esters	Microbe,Animals
neg_1432	Vanillic acid 4-O-sulfate	1451.51	645.751	1153.21	469.835	1619.31	2570.66	2457.01	2301.45	2204.18	2319.66	2191.81	2064.69	2674.21	5664.65	3325.22	630.727	4817.49	1.58153	0.0354352	1.55897	up	1.13219	0.0035141	1.61366	up	0.449342	0.306496	0.629269	unchanged	6.25166	C8H8O7S	246.993	0.827133	--	--	--	--	--	--	HMDB0041788	71235-86-4	Organic compounds	Benzenoids	Benzene and substituted derivatives	Benzoic acids and derivatives	Animals
neg_1449	4-Hydroxystyrene	94.666	62.3201	41.0164	11.6061	10.7978	41.247	25.146	23.3781	23.1256	30.7587	1.39272e-08	22.4945	52.8529	17.6999	10.8421	16.2487	7.00095	-1.05679	0.238137	1.01533	unchanged	-0.880588	0.285875	0.743948	unchanged	-0.176205	0.758434	0.1893	unchanged	2.12699	C8H8O	119.05	0.898633	C05627		--	--	--	--	HMDB0004072	2628-17-3	Organic compounds	Benzenoids	Benzene and substituted derivatives	Styrenes	Microbe,Animals,Plants
neg_1450	2-Hydroxycinnamic acid	295.382	208.201	198.402	116.201	104.034	155.416	158.897	124.627	109.579	102.294	97.3489	110.3	193.499	93.3624	112.761	145.859	83.6529	-0.58172	0.164935	1.1624	unchanged	-0.564794	0.164674	0.959304	unchanged	-0.0169266	0.943146	0.0214163	unchanged	5.59703	C9H8O3	163.041	0.898633	C05838		--	--	--	--	HMDB0041592	495-79-4	Organic compounds	Phenylpropanoids and polyketides	Cinnamic acids and derivatives	Hydroxycinnamic acids and derivatives	Animals
neg_1451	L-Tyrosine	4482.42	3430.3	3555.08	2224.65	1885.3	2773.7	2721.37	2597.54	2259.53	2381.44	2292.81	2193.35	3248.18	1858.25	2245.99	2421.81	1866.83	-0.434262	0.17215	1.16201	unchanged	-0.315022	0.268581	0.816797	unchanged	-0.11924	0.41306	0.483537	unchanged	7.77875	C9H11NO3	180.068	0.898633	C06420	--	--	--	--	--	--	--	--	--	--	--	--
neg_1455	CMP-2-aminoethylphosphonate	8.43624	1.39272e-08	1.39272e-08	1.39272e-08	1.39272e-08	1.39272e-08	1.39272e-08	1.39272e-08	1.39272e-08	1.39272e-08	1.39272e-08	1.39272e-08	1.39272e-08	1.39272e-08	1.39272e-08	1.39272e-08	1.39272e-08	-26.8522	0.373901	0.84293	unchanged	-26.8522	0.373901	0.606076	unchanged	0	1	0	unchanged	-0.833024	C11H20N4O10P2	451.04	0.898633	C05673	Phosphonate and phosphinate metabolism(ko00440);;Metabolic pathways(ko01100)	--	--	--	--	HMDB0060067	--	Organic compounds	Organic oxygen compounds	Organooxygen compounds	Carbohydrates and carbohydrate conjugates	Animals
neg_1458	urea glutamate	232.085	139.122	152.626	107.214	29.4297	145.439	166.652	149.183	90.6224	112.443	89.4781	136.175	249.777	92.7793	139.542	179.895	64.5465	0.122343	0.789604	0.274023	unchanged	-0.0723263	0.862318	0.162277	unchanged	0.194669	0.562221	0.394852	unchanged	-2.26008	C6H9N3O5	248.052	0.9058	--	--	--	--	--	--	HMDB0259716	--	Organic compounds	Organic acids and derivatives	Carboxylic acids and derivatives	Amino acids, peptides, and analogues	Animals
neg_1460	5-Methyldeoxycytidine	1.39272e-08	1.39272e-08	1.39272e-08	1.39272e-08	1.39272e-08	1.39272e-08	1.39272e-08	1.39272e-08	1.39272e-08	1.39272e-08	1.39272e-08	1.39272e-08	1.39272e-08	1.39272e-08	1.39272e-08	1.39272e-08	1.39272e-08	0	1	0	unchanged	0	1	0	unchanged	0	1	0	unchanged	-2.64997	C10H15N3O4	286.104	0.912933	C03592	--	--	--	--	--	HMDB0002224	838-07-3	Organic compounds	Nucleosides, nucleotides, and analogues	Pyrimidine nucleosides	Pyrimidine 2'-deoxyribonucleosides	Animals
neg_1464	Phenylalanylarginine	1.39272e-08	1.39272e-08	1.39272e-08	1.39272e-08	1.39272e-08	1.39272e-08	1.39272e-08	1.39272e-08	1.39272e-08	1.39272e-08	1.39272e-08	1.39272e-08	1.39272e-08	1.39272e-08	1.39272e-08	1.39272e-08	1.39272e-08	0	1	0	unchanged	0	1	0	unchanged	0	1	0	unchanged	0.31308	C15H23N5O3	320.173	0.92725	--	--	--	--	--	--	HMDB0028989	1238-09-1	Organic compounds	Organic acids and derivatives	Carboxylic acids and derivatives	Amino acids, peptides, and analogues	Animals
neg_1465	3-Dehydroquinate	553.974	369.683	635.434	308.067	493.009	680.296	654.986	612.852	557.876	662.117	640.412	599.013	417.248	458.88	385.479	306.386	238.654	-0.23549	0.39077	0.836528	unchanged	0.427314	0.0502789	1.20659	unchanged	-0.662804	0.00461329	1.54031	down	8.52557	C7H10O6	189.042	0.94155	C00944	Phenylalanine, tyrosine and tryptophan biosynthesis(ko00400);;Metabolic pathways(ko01100);;Biosynthesis of amino acids(ko01230)	--	--	--	--	HMDB0012710	10534-44-8	Organic compounds	Organic acids and derivatives	Hydroxy acids and derivatives	Alpha hydroxy acids and derivatives	Microbe,Animals
neg_1467	Guanosine	0.156487	80.7929	21.7822	227.116	145.542	398.744	394.043	385.659	330.28	336.116	315.602	182.373	170.801	365.871	140.92	343.757	292.144	1.39076	0.0253499	1.61897	up	1.92111	0.0018012	1.65238	up	-0.530347	0.0370508	1.25887	down	4.68929	C10H13N5O5	282.086	0.948683	--	--	--	--	--	--	HMDB0246240	118-00-3	Organic compounds	Nucleosides, nucleotides, and analogues	Purine nucleosides	_	Animals
neg_1468	1,1-Bis(4-hydroxyphenyl)-2-phenyl-2-iodoethene	15.4417	17.6271	24.5899	1.39272e-08	21.8646	23.4716	36.4397	5.80948	1.39272e-08	7.22576	1.39272e-08	5.27041	1.39272e-08	18.6337	1.39272e-08	1.39272e-08	20.7151	-1.09674	0.182122	1.1313	unchanged	-0.38757	0.623845	0.300075	unchanged	-0.709174	0.52835	0.406188	unchanged	0.838434	C20H15IO2	413.005	0.963	--	--	--	--	--	--	HMDB0259673	--	Organic compounds	Phenylpropanoids and polyketides	Stilbenes	_	Animals
neg_1471	Inosine	191.352	1396.81	192.866	2185.21	1503.05	4114.07	4119.89	3752.41	3433.66	3727.52	3660.17	2208.3	1567.51	3181.06	745.088	2442.9	4137.52	1.12178	0.0699046	1.32669	unchanged	1.79707	0.0015587	1.6789	up	-0.675286	0.0321136	1.31614	down	9.35169	C10H12N4O5	267.076	0.970133	--	--	--	--	--	--	--	--	--	--	--	--	--
neg_1472	3,4-Dihydroxyphenylvaleric acid 3 glucuronide	1.39272e-08	1.39272e-08	1.39272e-08	1.39272e-08	1.39272e-08	2.91842	1.39272e-08	1.39272e-08	1.39272e-08	1.39272e-08	1.39272e-08	1.39272e-08	1.39272e-08	1.39272e-08	1.39272e-08	1.39272e-08	1.39272e-08	0	1	0	unchanged	25.0577	0.363217	0.510429	unchanged	-25.0577	0.363217	0.570815	unchanged	-6.46366	C17H22O10	407.093	0.970133	--	--	--	--	--	--	HMDB0240445	--	Organic compounds	Lipids and lipid-like molecules	Saccharolipids	_	Animals
neg_1479	Succinic acid	849.983	916.313	1849.6	519.898	1057.37	1077.41	1029.43	874.514	842.699	972.154	930.691	665.045	382.543	620.204	428.999	266.119	1029.81	-0.877208	0.104609	1.45694	unchanged	-0.121895	0.725429	0.315723	unchanged	-0.755313	0.0155945	1.40618	down	15.6377	C4H6O4	117.021	0.9916	C00042	Citrate cycle (TCA cycle)(ko00020);;Oxidative phosphorylation(ko00190);;Alanine, aspartate and glutamate metabolism(ko00250);;Lysine degradation(ko00310);;Tyrosine metabolism(ko00350);;Phenylalanine metabolism(ko00360);;Pyruvate metabolism(ko00620);;Glyoxylate and dicarboxylate metabolism(ko00630);;Propanoate metabolism(ko00640);;Butanoate metabolism(ko00650);;Nicotinate and nicotinamide metaboli…	LMFA01170043	Fatty Acyls [FA]	Fatty Acids and Conjugates [FA01]	Dicarboxylic acids [FA0117]	HMDB0000254	110-15-6	Organic compounds	Organic acids and derivatives	Carboxylic acids and derivatives	Dicarboxylic acids and derivatives	Microbe,Animals,Plants
neg_1486	2-(1,3-Dimethyl-2,6-dioxo-1,2,3,6-tetrahydro-7H-purin-7-yl)-N-(4-isopropylphenyl)acetamide	1.39272e-08	1.39272e-08	1.39272e-08	1.39272e-08	1.39272e-08	1.39272e-08	1.39272e-08	1.39272e-08	1.39272e-08	1.39272e-08	1.39272e-08	1.39272e-08	1.39272e-08	1.39272e-08	1.39272e-08	1.39272e-08	1.39272e-08	0	1	0	unchanged	0	1	0	unchanged	0	1	0	unchanged	-3.86637	C18H21N5O3	376.138	0.99875	--	--	--	--	--	--	HMDB0253057	1000322-24-4	Organic compounds	Organoheterocyclic compounds	Imidazopyrimidines	Purines and purine derivatives	Animals
neg_1488	2-Hydroxyphenylacetic acid glucuronide	21.2616	19.6027	8.96167	1.39272e-08	1.39272e-08	23.7247	29.919	20.808	3.15341	0.937246	0.00224168	14.9311	32.5897	9.54271	1.39272e-08	3.89757	14.2998	0.33197	0.702529	0.338035	unchanged	0.393581	0.669314	0.209638	unchanged	-0.0616106	0.940367	0.0156255	unchanged	-0.969603	C17H22O6	343.116	1.03378	--	--	--	--	--	--	HMDB0240440	--	_	_	_	_	Animals
neg_1490	(R)-benzyl Mandelate	1562.21	1229.41	1953.94	1284.82	1050.09	1902.22	1824.82	1653.9	1438.07	1672.7	1652.73	1431.3	2025.28	1015.77	1052.7	1059	1028.04	-0.158587	0.533735	0.546205	unchanged	0.255739	0.164484	0.835634	unchanged	-0.414326	0.0510255	1.13799	unchanged	-11.4462	C15H14O3	241.084	1.04092	--	--	--	--	--	--	--	--	--	--	--	--	--
neg_1496	1,4-Ipomeadiol	128.64	97.1189	278.37	41.1868	98.6663	182.869	125.769	128.818	96.8243	134.498	150.207	155.284	103.732	161.435	78.7966	59.4528	183.402	-0.0584378	0.913025	0.224978	unchanged	0.0837828	0.861026	0.0403242	unchanged	-0.142221	0.601077	0.327022	unchanged	-1.48143	C9H14O3	205.063	1.09813	--	--	--	--	--	--	HMDB0030471	53011-73-7	Organic compounds	Organoheterocyclic compounds	Heteroaromatic compounds	_	Animals
neg_1498	2-Aminophenol	1.39272e-08	1.39272e-08	1.39272e-08	1.39272e-08	1.39272e-08	1.39272e-08	1.39272e-08	1.39272e-08	1.39272e-08	1.39272e-08	1.39272e-08	1.39272e-08	1.39272e-08	1.39272e-08	1.39272e-08	1.39272e-08	1.39272e-08	0	1	0	unchanged	0	1	0	unchanged	0	1	0	unchanged	6.20234	C6H7NO	108.046	1.11958	C01987	Tryptophan metabolism(ko00380);;Metabolic pathways(ko01100)	--	--	--	--	--	--	--	--	--	--	--
neg_1499	Clavulanate-9-aldehyde	14.1562	6.41511	89.1809	1.39272e-08	1.39272e-08	21.7475	3.62614	3.90689	1.39272e-08	9.4726	1.39272e-08	1.39272e-08	1.39272e-08	1.39272e-08	1.39272e-08	1.39272e-08	1.39272e-08	-30.5537	0.266398	1.13644	unchanged	-1.7649	0.418654	0.631496	unchanged	-28.7888	0.113462	1	unchanged	11.7983	C8H7NO5	196.027	1.12673	--	--	--	--	--	--	--	--	--	--	--	--	--
neg_1500	Monotropein	27.3196	3.79159	1.39272e-08	1.39272e-08	1.39272e-08	29.6773	11.0856	27.3068	7.03618	21.7536	7.27174	10.3374	18.0478	6.25274	3.07012	4.35199	1.39272e-08	0.171982	0.898787	0.129431	unchanged	1.47986	0.137958	0.879786	unchanged	-1.30788	0.0664062	1.04554	unchanged	-13.7019	C16H22O11	411.086	1.13388	--	--	--	--	--	--	--	--	--	--	--	--	--
neg_1504	Alanylmethionine	1.39272e-08	1.39272e-08	1.39272e-08	1.39272e-08	1.39272e-08	1.39272e-08	1.39272e-08	1.39272e-08	1.39272e-08	1.39272e-08	1.39272e-08	1.39272e-08	1.39272e-08	1.39272e-08	1.39272e-08	1.39272e-08	1.39272e-08	0	1	0	unchanged	0	1	0	unchanged	0	1	0	unchanged	0.396525	C8H16N2O3S	219.081	1.14103	--	--	--	--	--	--	HMDB0028693	14486-05-6	Organic compounds	Organic acids and derivatives	Carboxylic acids and derivatives	Amino acids, peptides, and analogues	Animals
neg_1508	N-(4-Amino-2,5-diethoxyphenyl)benzamide	11.507	1.39272e-08	5.49829	1.39272e-08	1.39272e-08	18.6771	1.39272e-08	8.99474	8.55758	15.8125	17.1816	1.39272e-08	23.5671	4.78121	9.98167	7.01784	15.3663	1.57302	0.138801	1.21938	unchanged	1.76225	0.0548786	1.02964	unchanged	-0.189232	0.757547	0.199441	unchanged	-14.398	C17H20N2O3	345.141	1.14103	--	--	--	--	--	--	HMDB0244456	120-00-3	Organic compounds	Benzenoids	Benzene and substituted derivatives	Anilides	Animals
neg_1509	5-Deoxykievitone	1588.56	792.892	1635.49	993.971	765.293	1770.39	1995.03	1845.99	1553.39	1432.41	1422.86	1658.82	2073.12	1233.4	1254.58	1613.26	1499.56	0.42915	0.122731	1.22356	unchanged	0.531666	0.0527233	1.12139	unchanged	-0.102516	0.488546	0.395039	unchanged	4.60043	C20H20O5	361.107	1.14103	C10418	--	LMPK12050458	Polyketides [PK]	Flavonoids [PK12]	Isoflavonoids [PK1205]	HMDB0034214	74161-24-3	Organic compounds	Phenylpropanoids and polyketides	Isoflavonoids	Isoflavans	Animals
neg_151	CDP-ethanolamine	1.39272e-08	1.39272e-08	1.39272e-08	1.39272e-08	1.39272e-08	1.39272e-08	1.39272e-08	1.39272e-08	1.39272e-08	1.39272e-08	1.39272e-08	1.39272e-08	1.39272e-08	1.39272e-08	1.39272e-08	1.39272e-08	1.39272e-08	0	1	0	unchanged	0	1	0	unchanged	0	1	0	unchanged	-22.9284	C11H20N4O11P2	467.025	0.5409	C00570	Glycerophospholipid metabolism(ko00564);;Metabolic pathways(ko01100)	--	--	--	--	HMDB0001564	3036-18-8	Organic compounds	Nucleosides, nucleotides, and analogues	Pyrimidine nucleotides	Pyrimidine ribonucleotides	Microbe,Animals
neg_1511	Imidazooxazole	1.39272e-08	1.39272e-08	1.39272e-08	1.39272e-08	1.39272e-08	1.39272e-08	1.39272e-08	1.39272e-08	1.39272e-08	1.39272e-08	1.39272e-08	1.39272e-08	1.39272e-08	1.39272e-08	5.96015	1.39272e-08	1.39272e-08	26.0879	0.363217	0.807451	unchanged	0	1	0	unchanged	26.0879	0.363217	0.602438	unchanged	0.246655	C4H3N3O	130.002	1.14818	--	--	--	--	--	--	HMDB0253423	--	Organic compounds	Organoheterocyclic compounds	Azolines	Oxazolines	Animals
neg_1512	5-(2'-Formylethyl)-4,6-dihydroxypicolinate	770.046	582.457	718.252	807.567	725.592	928.191	1022.31	982.209	922.447	820.591	769.11	861.518	1063.42	583.191	752.384	864.29	819.453	0.193154	0.204305	0.998117	unchanged	0.332296	0.00780222	1.36193	up	-0.139142	0.298352	0.607238	unchanged	26.5353	C9H9NO5	232.028	1.14818	--	--	--	--	--	--	--	--	--	--	--	--	--
neg_1516	Imidazole-4-acetate	2.88131	3.65763	20.7468	0.000525497	5.28793	43.7872	68.6114	33.7966	22.9884	12.7907	63.8428	5.40588	46.6406	13.2261	43.1301	33.2508	50.865	2.30016	0.0192208	1.76249	up	2.65275	0.0107786	1.29034	up	-0.352588	0.471564	0.425318	unchanged	5.35205	C5H6N2O2	251.08	1.15533	C02835	Histidine metabolism(ko00340);;Metabolic pathways(ko01100)	--	--	--	--	HMDB0002024	645-65-8	Organic compounds	Organoheterocyclic compounds	Azoles	Imidazoles	Animals
neg_1517	Pteridine	15.028	15.0278	1.39272e-08	1.39272e-08	1.39272e-08	1.39272e-08	1.39272e-08	1.39272e-08	1.39272e-08	1.39272e-08	6.84174	1.39272e-08	50.0726	1.39272e-08	1.39272e-08	1.39272e-08	1.39272e-08	0.473347	0.805569	0.287132	unchanged	-2.39824	0.264494	0.780814	unchanged	2.87159	0.430056	0.514793	unchanged	5.61952	C6H4N4	131.037	1.15533	C07581	--	--	--	--	--	HMDB0256912	91-18-9	Organic compounds	Organoheterocyclic compounds	Pteridines and derivatives	_	Animals
neg_1518	3-[(2-Mercapto-1-methylpropyl)thio]-2-butanol	3856.6	3439.62	4001.26	1230.07	2497.77	2863.3	2904.67	2597.02	2756.68	3114.07	3127.09	2114.96	1795.59	3100.82	2809.67	1797.28	2620.7	-0.34058	0.307704	0.927464	unchanged	-0.0544277	0.841215	0.218636	unchanged	-0.286152	0.0702779	1.11836	unchanged	7.99762	C8H18OS2	215.056	1.16248	--	--	--	--	--	--	HMDB0037295	54957-02-7	Organic compounds	Organic oxygen compounds	Organooxygen compounds	Alcohols and polyols	Animals
neg_1520	3-Hydroxymethylantipyrine	1.39272e-08	1.39272e-08	1.39272e-08	1.39272e-08	1.39272e-08	16.1483	0.149504	2.79924	1.39272e-08	0.271704	1.39272e-08	1.39272e-08	14.4061	21.2661	8.06417	25.468	1.39272e-08	29.6253	0.0463067	1.56443	up	27.7882	0.272934	0.612964	unchanged	1.83713	0.141474	0.86965	unchanged	13.4154	C11H12N2O2	249.091	1.16248	--	--	--	--	--	--	HMDB0013840	18125-49-0	Organic compounds	Organoheterocyclic compounds	Azoles	Pyrazoles	Animals
neg_1521	3'-C-Ethynylcytidine	1476.13	912.303	531.342	273.02	293.767	709.841	850.785	804.216	795.306	630.499	711.093	457.543	957.792	674.622	896.704	654.269	560.78	0.00613778	0.990579	0.103778	unchanged	0.105644	0.827643	0.111411	unchanged	-0.0995059	0.577213	0.336984	unchanged	-0.510724	C11H13N3O5	288.06	1.15533	--	--	--	--	--	--	HMDB0252093	--	Organic compounds	Nucleosides, nucleotides, and analogues	Pyrimidine nucleosides	_	Animals
neg_1524	4-Pyridoxic acid	124.108	63.0253	165.205	40.5315	40.8115	160.862	133.53	105.199	76.1356	126.005	99.7136	119.826	104.886	149.617	64.5117	45.3899	66.5475	0.0818029	0.869267	0.0265813	unchanged	0.430661	0.317962	0.590971	unchanged	-0.348858	0.244024	0.706191	unchanged	8.52242	C8H9NO4	182.047	1.17678	C00847	Vitamin B6 metabolism(ko00750);;Metabolic pathways(ko01100)	--	--	--	--	HMDB0000017	82-82-6	Organic compounds	Organoheterocyclic compounds	Pyridines and derivatives	Pyridinecarboxylic acids and derivatives	Animals
neg_1529	(4Z,7Z,10S,11E)-10-Hydroperoxy-12-[(1R,4S,5S,6R)-6-[(2Z)-pent-2-en-1-yl]-2,3-dioxabicyclo[2.2.1]heptan-5-yl]dodeca-4,7,11-trienoylcarnitine	1.39272e-08	1.39272e-08	1.39272e-08	1.39272e-08	1.39272e-08	1.39272e-08	1.39272e-08	1.39272e-08	1.39272e-08	1.39272e-08	1.39272e-08	1.39272e-08	1.39272e-08	1.39272e-08	1.39272e-08	1.39272e-08	1.39272e-08	0	1	0	unchanged	0	1	0	unchanged	0	1	0	unchanged	-0.324718	C29H45NO8	534.307	1.20538	--	--	--	--	--	--	HMDB0241812	--	Organic compounds	Lipids and lipid-like molecules	Fatty Acyls	Eicosanoids	Animals
neg_153	Dehydroisoandrosterone 3-glucuronide	1.39272e-08	11.2763	1.39272e-08	1.39272e-08	1.39272e-08	1.39272e-08	14.5191	1.39272e-08	1.39272e-08	1.39272e-08	1.39272e-08	1.39272e-08	18.3274	12.5393	1.39272e-08	1.39272e-08	1.39272e-08	1.18973	0.492708	0.614363	unchanged	0.10163	0.961402	0.00693165	unchanged	1.0881	0.525078	0.384538	unchanged	7.52331	C25H36O8	499.214	0.5409	--	--	LMST05010064	Sterol Lipids [ST]	Steroid conjugates [ST05]	Glucuronides [ST0501]	--	--	--	--	--	--	--
neg_1534	2-Hydroxy-4-imino-2,5-cyclohexadienone	148.244	81.3575	144.076	84.8688	32.8317	158.567	139.362	89.8343	56.5535	110.659	67.0838	143.52	148.772	76.1698	71.0453	30.6899	51.4557	-0.176777	0.70864	0.382068	unchanged	0.0771865	0.847324	0.0904329	unchanged	-0.253964	0.531025	0.359899	unchanged	18.6547	C6H5NO2	122.027	1.23398	--	--	--	--	--	--	HMDB0031713	74331-93-4	Organic compounds	Organic nitrogen compounds	Organonitrogen compounds	Quinonimines	Animals,Microbe
neg_1537	S-Sulfo-L-cysteine	87.8823	39.1492	27.8759	29.8148	43.7645	86.1278	81.9737	47.177	46.734	44.7761	51.6839	65.3631	100.246	45.787	45.8735	52.8206	40.4198	0.35431	0.396233	0.743473	unchanged	0.386718	0.327596	0.623487	unchanged	-0.0324088	0.913742	0.0422631	unchanged	-2.49738	C3H7NO5S2	221.951	1.22683	C05824	Cysteine and methionine metabolism(ko00270);;Metabolic pathways(ko01100);;Biosynthesis of amino acids(ko01230)	--	--	--	--	HMDB0000731	1637-71-4	Organic compounds	Organic acids and derivatives	Carboxylic acids and derivatives	Amino acids, peptides, and analogues	Animals
neg_1538	Xanthosine	626.833	349.991	886.987	312.345	300.765	329.946	300.807	257.587	250.183	246.72	252.588	233.348	152.552	121.416	71.6832	81.3042	265.623	-1.68261	0.0385207	1.84436	down	-0.859796	0.124523	1.09648	unchanged	-0.822815	0.0129304	1.39408	down	4.03004	C10H12N4O6	283.07	1.22683	--	--	--	--	--	--	--	--	--	--	--	--	--
neg_1542	3-Formyl-6-hydroxyindole	155.231	40.988	305.189	1.39272e-08	1.39272e-08	31.9448	30.6903	1.39272e-08	4.47095	16.8323	11.8085	5.16914	2.02188	123.286	1.39272e-08	1.39272e-08	1.39272e-08	-2.20522	0.261495	1.10528	unchanged	-2.65172	0.223907	0.906369	unchanged	0.446497	0.792844	0.132806	unchanged	12.4804	C9H7NO2	160.042	1.24113	--	--	--	--	--	--	HMDB0031172	192184-71-7	Organic compounds	Organoheterocyclic compounds	Indoles and derivatives	Hydroxyindoles	Microbe,Animals
neg_1543	7,8-Dihydro-7,8-dihydroxykynurenate	211.874	71.522	150.487	71.4438	59.4202	220.316	207.955	143.365	126.183	150.445	116.912	153.119	146.7	284.799	146.804	102.098	84.6994	0.438199	0.356622	0.69054	unchanged	0.510153	0.20863	0.762931	unchanged	-0.0719548	0.821817	0.151802	unchanged	5.60168	C10H9NO5	222.042	1.24113	--	--	--	--	--	--	--	--	--	--	--	--	--
neg_1548	5-Fluorouridine diphosphate	1.39272e-08	1.39272e-08	1.39272e-08	1.39272e-08	1.39272e-08	1.39272e-08	1.39272e-08	1.39272e-08	1.39272e-08	1.39272e-08	1.39272e-08	1.39272e-08	1.39272e-08	1.39272e-08	1.39272e-08	1.39272e-08	1.39272e-08	0	1	0	unchanged	0	1	0	unchanged	0	1	0	unchanged	37.7439	C9H13FN2O12P2	442.983	1.24113	--	--	--	--	--	--	--	--	--	--	--	--	--
neg_1554	4-(Methylnitrosamino)-1-(3-pyridyl)-1-butanol glucuronide	1.39272e-08	1.39272e-08	1.39272e-08	1.39272e-08	1.39272e-08	1.39272e-08	1.39272e-08	1.39272e-08	1.39272e-08	1.39272e-08	1.39272e-08	1.39272e-08	1.39272e-08	1.39272e-08	1.39272e-08	1.39272e-08	1.39272e-08	0	1	0	unchanged	0	1	0	unchanged	0	1	0	unchanged	8.56742	C16H23N3O8	815.302	1.26258	C19605	Metabolism of xenobiotics by cytochrome P450(ko00980);;Chemical carcinogenesis - DNA adducts(ko05204)	--	--	--	--	--	--	--	--	--	--	--
neg_1561	(R)-3-[3-(4-Fluorophenylsulphonylamino)-1,2,3,4-tetrahydrocarbazol-9-yl]propionic acid	1.39272e-08	1.39272e-08	279.961	1.39272e-08	1.39272e-08	13.9135	17.2521	5.93489	1.39272e-08	1.39272e-08	14.1903	1.39272e-08	1.39272e-08	32.2876	89.2696	1.39272e-08	1.39272e-08	-1.46662	0.566701	0.596935	unchanged	-2.71148	0.444908	0.609872	unchanged	1.24486	0.470293	0.47511	unchanged	0.619672	C21H21FN2O4S	437.096	1.28403	--	--	--	--	--	--	HMDB0248897	--	Organic compounds	Organoheterocyclic compounds	Indoles and derivatives	Carbazoles	Animals
neg_1562	Chitobiose	1.39272e-08	1.39272e-08	1.39272e-08	1.39272e-08	1.39272e-08	1.39272e-08	1.39272e-08	1.39272e-08	1.39272e-08	1.39272e-08	1.39272e-08	1.39272e-08	1.39272e-08	1.39272e-08	1.39272e-08	1.39272e-08	1.39272e-08	0	1	0	unchanged	0	1	0	unchanged	0	1	0	unchanged	-1.47613	C16H28N2O11	893.336	1.27688	--	--	--	--	--	--	--	--	--	--	--	--	--
neg_1573	9,10-Anthracenedione, 1,5-dihydroxy-3-methyl-8-((2,6,7,7a-tetrahydro-4 H-furo(3,2-c)pyran-4-yl)oxy)-	2678.38	1860.47	1636.21	1414.6	1282.81	1659.85	1924.13	1609.21	1541.21	1414.88	1350.25	1639.89	2016.27	908.032	1285.9	1455.44	2386.4	-0.135586	0.638993	0.366102	unchanged	-0.164513	0.49576	0.48317	unchanged	0.0289273	0.893714	0.0981086	unchanged	3.16129	C22H18O7	429.076	1.29833	--	--	--	--	--	--	HMDB0247666	93513-59-8	Organic compounds	Benzenoids	Anthracenes	Anthraquinones	Animals
neg_1574	3,4,5-trihydroxy-6-({2-[3-(7-methoxy-2-oxo-2H-chromen-6-yl)oxiran-2-yl]propan-2-yl}oxy)oxane-2-carboxylic acid	574.385	257.608	363.894	175.621	257.445	375.726	403.879	273.203	248.686	217.944	227.114	321.73	236.049	167.955	125.409	152.351	525.2	-0.354679	0.462287	0.665848	unchanged	-0.16247	0.665521	0.305653	unchanged	-0.192209	0.615388	0.30857	unchanged	-10.2242	C21H24O11	473.102	1.29833	--	--	--	--	--	--	HMDB0130523	133644-78-7	Organic compounds	Organic oxygen compounds	Organooxygen compounds	Carbohydrates and carbohydrate conjugates	Animals
neg_1579	Cytidine 2'-phosphate	4482.91	4600.07	1984.22	838.893	1147.45	2112.17	2364.04	2256.87	2073.63	2019	1895.8	909.133	1799.07	1509.32	2186.07	1323.89	2195.16	-0.658677	0.309486	0.85459	unchanged	-0.300206	0.578575	0.446756	unchanged	-0.358472	0.0752824	1.08566	unchanged	-12.6224	C9H14N3O8P	322.04	1.31263	C03104	--	--	--	--	--	HMDB0011692	85-94-9	Organic compounds	Organic oxygen compounds	Organooxygen compounds	Carbohydrates and carbohydrate conjugates	Animals
neg_1581	Glutathionylaminopropylcadaverine	1.39272e-08	1.39272e-08	1.39272e-08	1.39272e-08	1.39272e-08	1.39272e-08	1.39272e-08	1.39272e-08	1.39272e-08	1.39272e-08	1.39272e-08	1.39272e-08	1.39272e-08	1.39272e-08	1.39272e-08	1.39272e-08	1.39272e-08	0	1	0	unchanged	0	1	0	unchanged	0	1	0	unchanged	2.02166	C18H36N6O5S	483.217	1.30548	--	--	--	--	--	--	--	--	--	--	--	--	--
neg_1582	Curculigoside	1061.85	927.028	298.593	83.8209	104.738	365.911	366.031	343.151	258.432	327.757	328.759	141.935	338.689	182.892	326.273	167.571	411.468	-0.921374	0.329534	0.835567	unchanged	-0.578263	0.47708	0.542814	unchanged	-0.343112	0.193909	0.800016	unchanged	-9.84496	C22H26O11	487.118	1.30548	--	--	--	--	--	--	HMDB0250592	--	Organic compounds	Organic oxygen compounds	Organooxygen compounds	Carbohydrates and carbohydrate conjugates	Animals
neg_1583	Daunorubicin	859.139	453.579	339.591	207.395	183.176	312.238	391.865	292.406	238.678	266.568	202.599	287.719	383.034	144.469	232.572	254.993	593.256	-0.370647	0.527808	0.532677	unchanged	-0.524414	0.372964	0.63074	unchanged	0.153767	0.659021	0.282219	unchanged	-8.40104	C27H29NO10	548.149	1.30548	--	--	--	--	--	--	HMDB0255779	20830-81-3	Organic compounds	Phenylpropanoids and polyketides	Anthracyclines	_	Animals
neg_1586	N-Acetylisoputreanine	2.4604	6.58509	0.66625	1.39272e-08	1.39272e-08	8.06294	2.35563	0.0997112	0.0296883	10.6147	0.197182	0.207164	0.105631	0.871029	1.12146	1.39272e-08	1.39272e-08	-2.33782	0.281048	0.936486	unchanged	0.874068	0.494426	0.408167	unchanged	-3.21189	0.154424	0.930879	unchanged	3.37185	C9H18N2O3	201.125	1.31978	--	--	--	--	--	--	HMDB0094713	--	Organic compounds	Organic acids and derivatives	Carboxylic acids and derivatives	Amino acids, peptides, and analogues	Animals
neg_1588	2,3,4,5-Tetrahydro-7,8-dihydroxy-1-phenyl-1H-3-benzazepine	957.69	829.131	512.681	87.1795	191.012	512.508	546.316	472.7	434.449	579.058	499.487	175.684	396.761	355.963	515.409	311.919	426.676	-0.503192	0.433486	0.650831	unchanged	-0.0229011	0.964545	0.0907979	unchanged	-0.48029	0.0271027	1.29322	down	-3.2247	C16H17NO2	290.095	1.31978	--	--	--	--	--	--	HMDB0258327	--	Organic compounds	Organoheterocyclic compounds	Benzazepines	_	Animals
neg_1590	2-Amino-6-methyl-2,3,6,7-tetrahydro-1H-pteridin-4-one	202.621	245.223	16.6629	1.39272e-08	1.39272e-08	128.972	117.383	92.3218	80.3392	117.988	115.66	5.30766	57.0347	143.889	24.0334	1.39272e-08	5.50238	-1.24138	0.39889	0.703899	unchanged	0.227602	0.784857	0.147972	unchanged	-1.46898	0.0262736	1.32928	down	16.7654	C7H11N5O	202.074	1.33408	--	--	--	--	--	--	HMDB0255376	--	Organic compounds	Organoheterocyclic compounds	Pteridines and derivatives	Pterins and derivatives	Animals
neg_1591	7-t-Butoxyiminomethyl-camptothecin	1.39272e-08	1.39272e-08	3.99235	1.39272e-08	1.39272e-08	1.39272e-08	2.58605	1.39272e-08	1.39272e-08	1.39272e-08	1.39272e-08	1.39272e-08	1.39272e-08	1.39272e-08	2.25962	1.39272e-08	1.39272e-08	-1.08419	0.650373	0.436522	unchanged	-0.889521	0.699003	0.307258	unchanged	-0.194669	0.926184	0.0442662	unchanged	-4.91733	C25H25N3O5	468.152	1.32693	--	--	--	--	--	--	HMDB0247287	--	Organic compounds	Alkaloids and derivatives	Camptothecins	_	Animals
neg_1593	2',3'-Dideoxyuridine	1.39272e-08	1.39272e-08	1.39272e-08	1.39272e-08	1.39272e-08	1.39272e-08	3.42776	1.39272e-08	1.39272e-08	1.39272e-08	1.39272e-08	1.39272e-08	1.39272e-08	2.24266	1.39272e-08	1.39272e-08	1.39272e-08	24.6778	0.363217	0.65936	unchanged	25.2898	0.363217	0.53372	unchanged	-0.612058	0.779179	0.194884	unchanged	4.50509	C9H12N2O4	211.073	1.34123	--	--	--	--	--	--	HMDB0245547	--	Organic compounds	Nucleosides, nucleotides, and analogues	Pyrimidine nucleosides	Pyrimidine 2',3'-dideoxyribonucleosides	Animals
neg_1594	5,6-Dihydroxy-3-phenyl-1-aminomethylisochroman	1.39272e-08	1.39272e-08	1.39272e-08	1.39272e-08	1.39272e-08	1.39272e-08	1.39272e-08	1.39272e-08	1.39272e-08	1.39272e-08	1.39272e-08	1.39272e-08	1.39272e-08	1.39272e-08	1.39272e-08	1.39272e-08	1.39272e-08	0	1	0	unchanged	0	1	0	unchanged	0	1	0	unchanged	-1.00309	C16H17NO3	270.113	1.34123	--	--	--	--	--	--	HMDB0247720	--	Organic compounds	Organoheterocyclic compounds	Benzopyrans	2-benzopyrans	Animals
neg_1595	Lysylphenylalanine	5.88158	3.13685	1.39272e-08	1.39272e-08	1.39272e-08	0.712078	1.39272e-08	1.39272e-08	1.39272e-08	1.39272e-08	2.92402	1.39272e-08	0.0289004	1.17476	1.78484	1.39272e-08	0.141406	-1.78979	0.348453	0.806827	unchanged	-1.57352	0.389925	0.589987	unchanged	-0.216272	0.886082	0.0780884	unchanged	-4.05209	C15H23N3O3	292.165	1.34838	--	--	--	--	--	--	HMDB0304786	--	Organic compounds	Organic acids and derivatives	Carboxylic acids and derivatives	Amino acids, peptides, and analogues	Animals
neg_1597	2-Acetamido-4-(D-alanylamino)-2,4,6-trideoxy-D-mannopyranose	58.5085	19.9696	14.6505	12.3593	16.1336	62.4271	10.6927	8.06823	25.6244	1.39272e-08	1.39272e-08	44.5423	31.6656	1.39272e-08	1.39272e-08	12.4265	1.39272e-08	-0.719494	0.434217	0.693925	unchanged	-0.450353	0.627872	0.298454	unchanged	-0.26914	0.813142	0.119304	unchanged	18.8914	C11H21N3O5	310.123	1.36912	--	--	--	--	--	--	--	--	--	--	--	--	--
neg_1605	Glutarate	24.8153	37.552	4.37865	1.39272e-08	1.39272e-08	6.68042	7.23691	1.39272e-08	4.82212	1.39272e-08	2.64726	1.39272e-08	96.2627	2.4464	1.39272e-08	1.39272e-08	1.39272e-08	0.301468	0.865648	0.227837	unchanged	-1.905	0.269525	0.809062	unchanged	2.20647	0.457225	0.484074	unchanged	16.2499	C5H8O4	131.037	1.41202	C00489	Fatty acid degradation(ko00071);;Lysine degradation(ko00310);;Metabolic pathways(ko01100)	--	--	--	--	HMDB0000661	110-94-1	Organic compounds	Organic acids and derivatives	Carboxylic acids and derivatives	Dicarboxylic acids and derivatives	Animals,Plants
neg_1609	3- Hydroxyindolin-2-one-sulfate	109.354	113.875	508.085	11.8061	9.83412	39.5843	40.9252	9.92733	7.41121	17.1759	7.46256	37.9202	31.1689	276.151	3.2065	40.5267	147.794	-0.751298	0.57024	0.610058	unchanged	-2.88297	0.231012	0.908664	unchanged	2.13168	0.166422	0.837059	unchanged	6.7459	C8H7NO5S	227.999	1.4692	--	--	--	--	--	--	HMDB0304928	--	Organic compounds	Organoheterocyclic compounds	Indoles and derivatives	Indolines	Animals
neg_1610	Vasotocin	1.39272e-08	1.39272e-08	1.39272e-08	1.39272e-08	1.39272e-08	1.39272e-08	1.39272e-08	1.39272e-08	1.39272e-08	1.39272e-08	1.39272e-08	1.39272e-08	1.39272e-08	1.39272e-08	1.39272e-08	1.39272e-08	1.39272e-08	0	1	0	unchanged	0	1	0	unchanged	0	1	0	unchanged	-29.8948	C43H67N15O12S2	1084.39	1.47637	--	--	--	--	--	--	HMDB0242732	--	Organic compounds	Organic acids and derivatives	Carboxylic acids and derivatives	Amino acids, peptides, and analogues	Animals
neg_1612	3-Pyridinemethanol, 6-amino-alpha-(((1-methyl-4-phenylbutyl)amino)methyl)-	1.39272e-08	1.39272e-08	1.39272e-08	1.39272e-08	1.39272e-08	1.39272e-08	1.39272e-08	1.39272e-08	1.39272e-08	1.39272e-08	1.39272e-08	1.39272e-08	1.39272e-08	1.39272e-08	1.39272e-08	1.39272e-08	1.39272e-08	0	1	0	unchanged	0	1	0	unchanged	0	1	0	unchanged	-3.06657	C18H25N3O	320.174	1.47637	--	--	--	--	--	--	HMDB0253841	--	Organic compounds	Benzenoids	Benzene and substituted derivatives	Phenylbutylamines	Animals
neg_1617	Epidermin	1.39272e-08	1.39272e-08	1.39272e-08	1.39272e-08	1.39272e-08	1.39272e-08	1.39272e-08	1.39272e-08	29.2012	1825.07	335.553	1.39272e-08	2771.01	13915.7	1.39272e-08	1.39272e-08	1.39272e-08	37.539	0.275528	0.814468	unchanged	34.6092	0.273709	0.670649	unchanged	2.92981	0.338504	0.574102	unchanged	1.51848	C11H19NO6	306.12	1.51925	--	--	--	--	--	--	--	--	--	--	--	--	--
neg_1618	alpha-Zearalenol	571.546	475.811	906.114	447.827	671.778	574.01	543.46	482.355	484.527	486.559	441.49	549.617	381.273	462.956	390.505	333.048	407.381	-0.54656	0.0786508	1.63127	unchanged	-0.291804	0.249896	0.817837	unchanged	-0.254756	0.0555026	1.0945	unchanged	-17.1044	C18H24O5	365.155	1.51925	C14750	--	--	--	--	--	HMDB0041824	36455-72-8	Organic compounds	Phenylpropanoids and polyketides	Macrolides and analogues	_	Animals
neg_1621	N,N-Dimethyl-p-phenylenediamine	1.39272e-08	1.39272e-08	1.39272e-08	1.39272e-08	1.39272e-08	4.51815	1.39272e-08	1.39272e-08	1.39272e-08	1.39272e-08	1.39272e-08	1.39272e-08	1.39272e-08	1.39272e-08	1.39272e-08	1.39272e-08	1.39272e-08	0	1	0	unchanged	25.6883	0.363217	0.510429	unchanged	-25.6883	0.363217	0.570815	unchanged	0.8951	C8H12N2	181.098	1.53357	C04203	--	--	--	--	--	HMDB0247696	99-98-9	Organic compounds	Organic nitrogen compounds	Organonitrogen compounds	Amines	Animals
neg_1623	4,7-Megastigmadien-9-ol	1.39272e-08	1.39272e-08	1.39272e-08	1.39272e-08	1.39272e-08	1.39272e-08	1.39272e-08	1.39272e-08	1.39272e-08	1.39272e-08	1.39272e-08	1.39272e-08	1.39272e-08	1.39272e-08	1.39272e-08	1.39272e-08	1.39272e-08	0	1	0	unchanged	0	1	0	unchanged	0	1	0	unchanged	-4.09232	C13H22O	215.141	1.53357	--	--	--	--	--	--	HMDB0038731	25312-34-9	Organic compounds	Lipids and lipid-like molecules	Prenol lipids	Sesquiterpenoids	Animals
neg_1624	4-Acetyl-2(3H)-benzoxazolone	217.75	86.5626	100.351	51.1191	29.4387	171.433	154.664	84.3611	86.7452	128.197	82.6979	74.1933	89.1916	265.896	138.39	55.7438	76.0884	0.264653	0.679337	0.332464	unchanged	0.282272	0.585738	0.346179	unchanged	-0.0176189	0.969094	0.051906	unchanged	9.21734	C9H7NO3	222.042	1.5264	--	--	--	--	--	--	HMDB0040612	70735-79-4	Organic compounds	Organoheterocyclic compounds	Benzoxazoles	Benzoxazolones	Animals,Plants
neg_1625	3-Hydroxykynurenamine	407.941	257.117	444.346	107.667	211.499	291.007	295.432	216.867	176.606	213.938	201.967	286.635	293.481	220.751	124.293	82.5511	121.824	-0.601878	0.22411	1.11199	unchanged	-0.296496	0.456696	0.565565	unchanged	-0.305382	0.325307	0.58421	unchanged	7.85917	C9H12N2O2	225.089	1.5264	C05636	Tryptophan metabolism(ko00380)	--	--	--	--	HMDB0060281	--	Organic compounds	Organic oxygen compounds	Organooxygen compounds	Carbonyl compounds	Animals
neg_1628	Asp-Phe	1.39272e-08	1.39272e-08	1.39272e-08	1.39272e-08	1.39272e-08	1.39272e-08	1.39272e-08	1.39272e-08	1.39272e-08	1.39272e-08	1.39272e-08	1.39272e-08	1.39272e-08	3.36375	1.39272e-08	1.39272e-08	1.39272e-08	25.2626	0.363217	0.65936	unchanged	0	1	0	unchanged	25.2626	0.363217	0.549457	unchanged	1.17008	C13H16N2O5	279.099	1.54787	--	--	--	--	--	--	HMDB0000706	13433-09-5	Organic compounds	Organic acids and derivatives	Carboxylic acids and derivatives	Amino acids, peptides, and analogues	Animals
neg_1639	Niacin (Nicotinic acid)	111.259	106.373	93.162	52.5918	15.8774	131.8	138.421	76.3406	57.4187	73.6867	56.917	115.447	136.033	56.5038	55.2614	57.7408	32.137	-0.00633047	0.989537	0.0244296	unchanged	0.232184	0.588749	0.281445	unchanged	-0.238515	0.556396	0.333828	unchanged	16.1443	C6H5NO2	122.027	1.58362	--	--	--	--	--	--	--	--	--	--	--	--	--
neg_1640	Quinolinic acid	27.933	35.7729	38.2265	10.6048	51.1255	26.671	21.535	23.1203	36.6887	29.3653	38.6879	29.104	23.5205	11.7104	25.2092	20.7737	54.0712	-0.256645	0.563242	0.487031	unchanged	-0.157625	0.658992	0.317188	unchanged	-0.09902	0.77336	0.188245	unchanged	8.4736	C7H5NO4	187.998	1.57645	C03722	Tryptophan metabolism(ko00380);;beta-Alanine metabolism(ko00410);;Nicotinate and nicotinamide metabolism(ko00760);;Metabolic pathways(ko01100);;Biosynthesis of cofactors(ko01240)	--	--	--	--	HMDB0000232	89-00-9	Organic compounds	Organoheterocyclic compounds	Pyridines and derivatives	Pyridinecarboxylic acids and derivatives	Microbe,Animals,Plants
neg_1641	Sulfocysteine	0.070186	1.39272e-08	1.39272e-08	1.39272e-08	1.39272e-08	1.39272e-08	1.39272e-08	1.39272e-08	1.39272e-08	1.39272e-08	1.39272e-08	1.39272e-08	1.39272e-08	1.39272e-08	0.378604	1.39272e-08	1.39272e-08	2.1684	0.479162	0.652072	unchanged	-19.9429	0.373901	0.606076	unchanged	22.1113	0.363217	0.602438	unchanged	-4.55093	C3H7NO5S2	221.95	1.58362	--	--	--	--	--	--	HMDB0258593	--	Organic compounds	Organic acids and derivatives	Carboxylic acids and derivatives	Amino acids, peptides, and analogues	Animals
neg_1646	5-Acetamidopentanoate	349.656	564.122	331.484	95.5759	203.677	390	351.635	314.247	318.538	350.674	274.284	336.597	406.959	382.137	235.339	112.367	136.946	-0.202818	0.679388	0.346009	unchanged	0.109363	0.776068	0.115659	unchanged	-0.312181	0.275065	0.678914	unchanged	9.84517	C7H13NO3	158.084	1.60507	C03087	Lysine degradation(ko00310);;Metabolic pathways(ko01100)	LMFA01030987	Fatty Acyls [FA]	Fatty Acids and Conjugates [FA01]	Unsaturated fatty acids [FA0103]	HMDB0012175	--	Organic compounds	Lipids and lipid-like molecules	Fatty Acyls	Fatty acids and conjugates	Animals
neg_1648	Methyl-3H-thymidine	819.361	529.813	775.98	452.738	343.172	737.884	776.229	605.153	521.647	616.633	593.303	485.632	710.452	335.232	343.275	329.619	531.145	-0.357801	0.284764	0.928135	unchanged	0.135648	0.588716	0.30602	unchanged	-0.493449	0.0331762	1.19384	down	-10.4445	C11H16N2O5	277.078	1.61222	--	--	--	--	--	--	HMDB0254620	--	Organic compounds	Nucleosides, nucleotides, and analogues	Pyrimidine nucleosides	Pyrimidine 2'-deoxyribonucleosides	Animals
neg_1651	15-(3-methyl-5-pentylfuran-2-yl)pentadecanoyl-CoA	1.39272e-08	1.39272e-08	1.39272e-08	1.39272e-08	1.39272e-08	1.39272e-08	1.39272e-08	1.39272e-08	1.39272e-08	1.39272e-08	1.39272e-08	1.39272e-08	1.39272e-08	1.39272e-08	1.39272e-08	1.39272e-08	1.39272e-08	0	1	0	unchanged	0	1	0	unchanged	0	1	0	unchanged	-7.52689	C46H78N7O18P3S	1186.42	1.62652	--	--	--	--	--	--	HMDB0301588	--	_	_	_	_	Animals
neg_1659	trans-Zeatin	7213.41	5826.8	10532.5	3759.27	5831.96	4989.41	5056.04	4120.88	3981.78	4634.92	4663.5	3406.4	4185.9	3451.08	4431.44	3261.65	3731.74	-0.824764	0.0604988	1.7064	unchanged	-0.536025	0.14028	1.05555	unchanged	-0.288739	0.010269	1.35442	down	1.9551	C10H13N5O	218.105	1.65512	C00371	Metabolic pathways(ko01100)	--	--	--	--	HMDB0012204	1637-39-4	Organic compounds	Organoheterocyclic compounds	Imidazopyrimidines	Purines and purine derivatives	Animals,Plants,Microbe
neg_1661	Validoxylamine A 7'-phosphate	745.426	624.919	628.475	264.891	503.674	299.958	361.366	320.364	283.471	274.031	377.311	188.398	336.542	143.107	378.562	289.989	487.76	-0.86417	0.036587	1.5818	down	-0.793083	0.0440829	1.32908	down	-0.0710865	0.786931	0.160187	unchanged	-7.78286	C14H26NO11P	436.096	1.66227	--	--	--	--	--	--	--	--	--	--	--	--	--
neg_1663	1-Pentanethiol	753.452	632.005	490.496	405.872	438.354	460.51	466.104	456.239	411.646	459.993	493.678	344.361	441.628	281.926	379.571	387.651	576.729	-0.436587	0.107751	1.26168	unchanged	-0.248264	0.258913	0.805713	unchanged	-0.188322	0.237292	0.74171	unchanged	-12.5603	C5H12S	103.057	1.6694	--	--	--	--	--	--	HMDB0032457	110-66-7	Organic compounds	Organosulfur compounds	Thiols	Alkylthiols	Animals
neg_1666	L-Phenylalanine	42406.1	36752.3	35271.9	25351.7	27427.9	33816.8	33960.9	30970.7	28340.3	30531.5	30051.5	26888.9	32070.8	21480	26108.9	25475.3	37177.1	-0.245957	0.214101	0.998474	unchanged	-0.0964836	0.538329	0.477145	unchanged	-0.149473	0.250252	0.704692	unchanged	8.98839	C9H11NO2	164.073	1.6694	C02057	--	--	--	--	--	HMDB0250791	63-91-2	Organic compounds	Organic acids and derivatives	Carboxylic acids and derivatives	Amino acids, peptides, and analogues	Animals
neg_1671	D-Glucosaminate-6-phosphate	7697.67	7492.75	7097.35	5552.97	5902.73	6831.13	7196.04	7060.47	6220.06	5795.35	5630.2	6453.49	7378.86	4433.93	5654.5	5466.57	7130.44	-0.149043	0.318085	0.776159	unchanged	-0.0640705	0.583705	0.423362	unchanged	-0.0849729	0.505242	0.378063	unchanged	-26.7691	C6H14NO9P	310.003	1.6694	--	--	--	--	--	--	--	--	--	--	--	--	--
neg_1676	Coumestrin	5604.48	4441.33	3453.2	2729.09	2744.89	3457.45	3708.52	3398.88	3039.16	2895.14	2810.64	2777.04	3525.2	1874.26	2694.41	2611.44	4341.58	-0.353166	0.246219	0.934237	unchanged	-0.237648	0.361642	0.658153	unchanged	-0.115518	0.533227	0.376819	unchanged	-15.1026	C21H18O10	429.076	1.6694	--	--	--	--	--	--	HMDB0033587	92631-72-6	Organic compounds	Phenylpropanoids and polyketides	Isoflavonoids	Coumestans	Animals
neg_1677	Cyanidin 7-glucoside	134.675	51.8842	34.4138	13.5473	1.39272e-08	49.8315	55.9352	8.90716	52.0364	25.6154	15.5691	38.0465	34.4811	1.39272e-08	5.88514	14.115	74.7793	-0.750249	0.496218	0.609468	unchanged	-0.436894	0.645957	0.329531	unchanged	-0.313355	0.640535	0.303712	unchanged	-1.0936	C21H21O11+	470.083	1.6694	--	--	--	--	--	--	--	--	--	--	--	--	--
neg_1679	Isolindleyin	1443.47	963.369	619.227	211.208	112.746	542.942	579.469	544.353	461.255	414.241	420.606	438.76	1018.04	327.69	568.53	505.96	515.902	-0.252366	0.700181	0.282778	unchanged	-0.440211	0.514772	0.507648	unchanged	0.187845	0.523993	0.430301	unchanged	-9.25222	C23H26O11	499.118	1.6694	--	--	--	--	--	--	--	--	--	--	--	--	--
neg_1681	Esorubicin	2688.69	2000.87	1148.15	848.449	784.603	1163.37	1329.74	1192.72	983.816	1027.89	934.585	906.188	1190.37	563.648	861.924	801.755	1773.1	-0.556197	0.287095	0.892182	unchanged	-0.43482	0.354449	0.671546	unchanged	-0.121377	0.642095	0.2864	unchanged	-8.16309	C27H29NO10	548.15	1.6694	--	--	--	--	--	--	HMDB0251953	63521-85-7	Organic compounds	Phenylpropanoids and polyketides	Anthracyclines	_	Animals
neg_1682	Blood group B type 1 tetrasaccharide	908.724	540.738	214.903	109.029	105.906	297.167	310.563	241.526	198.532	221.479	229.749	148.799	217.881	41.8819	156.652	181.847	634.402	-0.707032	0.439694	0.634931	unchanged	-0.589215	0.463755	0.53655	unchanged	-0.117817	0.828581	0.142121	unchanged	-3.43391	C26H45NO20	712.226	1.6694	--	--	--	--	--	--	HMDB0249293	--	Organic compounds	Organic oxygen compounds	Organooxygen compounds	Carbohydrates and carbohydrate conjugates	Animals
neg_1689	Ritalinic acid	4.82557	1.39272e-08	1.39272e-08	1.39272e-08	1.39272e-08	12.6125	15.2673	1.39272e-08	1.39272e-08	23.1485	1.39272e-08	1.39272e-08	1.39272e-08	1.39272e-08	1.39272e-08	1.39272e-08	7.99337	0.46507	0.828593	0.179998	unchanged	3.13949	0.124586	0.915947	unchanged	-2.67442	0.143566	0.941339	unchanged	2.62517	C13H17NO2	483.287	1.68372	--	--	--	--	--	--	HMDB0042008	19395-41-6	Organic compounds	Organic nitrogen compounds	Organonitrogen compounds	Amines	Animals
neg_1693	PG(5-iso PGF2VI/a-17:0)	1.39272e-08	1.39272e-08	1.39272e-08	1.39272e-08	1.39272e-08	1.39272e-08	1.39272e-08	1.39272e-08	1.39272e-08	1.39272e-08	1.39272e-08	1.39272e-08	1.39272e-08	1.39272e-08	1.39272e-08	1.39272e-08	1.39272e-08	0	1	0	unchanged	0	1	0	unchanged	0	1	0	unchanged	-12.9218	C41H75O13P	841.454	1.68372	--	--	--	--	--	--	HMDB0270783	--	_	_	_	_	Animals
neg_1700	N5-Citryl-D-ornithine	1.39272e-08	1.39272e-08	1.39272e-08	1.39272e-08	1.39272e-08	1.39272e-08	1.39272e-08	1.39272e-08	1.39272e-08	1.39272e-08	1.39272e-08	1.39272e-08	1.39272e-08	1.39272e-08	1.39272e-08	1.39272e-08	1.39272e-08	0	1	0	unchanged	0	1	0	unchanged	0	1	0	unchanged	-11.1037	C11H18N2O8	327.078	1.73305	--	--	--	--	--	--	--	--	--	--	--	--	--
neg_1705	1,3,2-Dioxathiolane 2,2-dioxide	5801.98	4330.76	5249.08	4068.42	5440.98	5975.51	6387.4	5137.56	4465.12	4258.95	4099.02	6481.41	5974.79	3906.87	3983.54	3966.42	5339.67	-0.0105085	0.951181	0.131961	unchanged	0.0217679	0.885608	0.0898454	unchanged	-0.0322764	0.857705	0.0736661	unchanged	8.01565	C2H4O4S	144.959	1.75452	--	--	--	--	--	--	HMDB0252075	--	Organic compounds	Organic acids and derivatives	Organic sulfuric acids and derivatives	Sulfuric acid esters	Animals
neg_1706	Kelatorphan	1017.21	955.677	869.061	813.308	813.723	885.893	863.229	800.359	882.829	1009.8	944.16	754.441	1378.7	2473.31	773.522	754.502	1015.83	0.415026	0.330559	0.738882	unchanged	0.00630492	0.939444	0.0402593	unchanged	0.408721	0.335042	0.577865	unchanged	-9.12024	C14H18N2O5	293.112	1.75452	--	--	--	--	--	--	HMDB0253779	--	Organic compounds	Organic acids and derivatives	Carboxylic acids and derivatives	Amino acids, peptides, and analogues	Animals
neg_1707	Berberrubine	50.7102	3.67883	4.90586	1.39272e-08	1.39272e-08	14.1978	25.4891	1.39272e-08	3.71762	4.0344	1.39272e-08	1.39272e-08	82.1091	190.326	10.0218	1.39272e-08	1.39272e-08	1.98902	0.327057	0.750216	unchanged	-0.58487	0.7232	0.223979	unchanged	2.57389	0.270679	0.673718	unchanged	10.8247	C19H16NO4+	357.081	1.75452	--	--	--	--	--	--	HMDB0030266	17388-19-1	Organic compounds	Alkaloids and derivatives	Protoberberine alkaloids and derivatives	_	Animals,Plants
neg_1708	Hydrazinonicotinamide	1514.07	1276.32	3388.09	1209.28	1178.79	1920.74	1981.95	1823.88	1512.17	1790.13	1749.49	2485.14	1367.26	1346.17	1674.73	1176.9	1390.2	-0.122902	0.774296	0.392785	unchanged	0.0683183	0.855124	0.0495961	unchanged	-0.19122	0.317233	0.582486	unchanged	-2.81857	C6H8N4O	363.153	1.76168	--	--	--	--	--	--	HMDB0253240	--	Organic compounds	Organoheterocyclic compounds	Pyridines and derivatives	Pyridinecarboxylic acids and derivatives	Animals
neg_1711	CDP-DG(i-14:0/20:3(8Z,11Z,14Z)-2OH(5,6))	1.39272e-08	1.39272e-08	1.39272e-08	1.39272e-08	1.39272e-08	1.39272e-08	1.39272e-08	1.39272e-08	1.39272e-08	1.39272e-08	1.39272e-08	1.39272e-08	1.39272e-08	1.39272e-08	1.39272e-08	1.39272e-08	1.39272e-08	0	1	0	unchanged	0	1	0	unchanged	0	1	0	unchanged	24.0042	C46H79N3O17P2	1006.51	1.77597	--	--	--	--	--	--	HMDB0293508	--	_	_	_	_	Animals
neg_1716	2-trans-6-cis-Dodecadienal	1.39272e-08	1.39272e-08	1.39272e-08	1.39272e-08	1.39272e-08	1.39272e-08	1.39272e-08	1.39272e-08	1.39272e-08	1.39272e-08	1.39272e-08	1.39272e-08	1.39272e-08	1.39272e-08	1.39272e-08	1.39272e-08	1.39272e-08	0	1	0	unchanged	0	1	0	unchanged	0	1	0	unchanged	-2.58626	C12H20O	201.126	1.77597	--	--	--	--	--	--	HMDB0032531	21662-13-5	Organic compounds	Organic oxygen compounds	Organooxygen compounds	Carbonyl compounds	Animals
neg_1718	PI(PGF1alpha/18:1(11Z))	1.39272e-08	1.39272e-08	1.39272e-08	1.39272e-08	1.39272e-08	1.39272e-08	1.39272e-08	1.39272e-08	1.39272e-08	1.39272e-08	1.39272e-08	1.39272e-08	1.39272e-08	1.39272e-08	1.39272e-08	1.39272e-08	1.39272e-08	0	1	0	unchanged	0	1	0	unchanged	0	1	0	unchanged	-25.7401	C47H85O16P	935.526	1.78312	--	--	--	--	--	--	HMDB0276541	--	_	_	_	_	Animals
neg_1720	Acetyl-DL-Valine	694.785	1133.58	522.391	237.256	391.008	700.814	663.375	586.857	545.914	600.006	551.321	571.34	814.571	710.008	488.578	249.415	231.314	-0.221878	0.655241	0.342535	unchanged	0.0293479	0.941085	0.0206994	unchanged	-0.251226	0.372057	0.553296	unchanged	9.92189	C7H13NO3	158.084	1.79027	--	--	--	--	--	--	--	--	--	--	--	--	--
neg_1721	Simmondsin	1.39272e-08	1.39272e-08	1.39272e-08	1.39272e-08	1.39272e-08	1.39272e-08	1.39272e-08	1.39272e-08	1.39272e-08	1.39272e-08	1.39272e-08	1.39272e-08	1.39272e-08	1.39272e-08	1.39272e-08	1.39272e-08	1.39272e-08	0	1	0	unchanged	0	1	0	unchanged	0	1	0	unchanged	2.64754	C16H25NO9	396.129	1.79027	--	--	--	--	--	--	HMDB0030394	51771-52-9	Organic compounds	Organic oxygen compounds	Organooxygen compounds	Carbohydrates and carbohydrate conjugates	Animals
neg_1725	Lasinavir	1.39272e-08	1.39272e-08	1.39272e-08	1.39272e-08	1.39272e-08	1.39272e-08	1.39272e-08	1.39272e-08	1.39272e-08	1.39272e-08	1.39272e-08	1.39272e-08	1.39272e-08	1.39272e-08	1.39272e-08	1.39272e-08	1.39272e-08	0	1	0	unchanged	0	1	0	unchanged	0	1	0	unchanged	-4.49072	C35H53N3O9	694.345	1.79742	--	--	--	--	--	--	HMDB0253986	--	Organic compounds	Benzenoids	Benzene and substituted derivatives	Phenethylamines	Animals
neg_1727	(+)-cis-3,4-Dihydrophenanthrene-3,4-diol	1.39272e-08	1.39272e-08	6.62556	1.39272e-08	1.39272e-08	1.39272e-08	1.39272e-08	1.39272e-08	1.39272e-08	1.39272e-08	1.39272e-08	1.39272e-08	1.39272e-08	1.39272e-08	1.39272e-08	1.39272e-08	1.39272e-08	-26.5036	0.373901	0.936616	unchanged	-26.5036	0.373901	0.694701	unchanged	0	1	0	unchanged	-10.9407	C14H12O2	211.074	1.81172	--	--	--	--	--	--	--	--	--	--	--	--	--
neg_1728	Zipeprol	150.181	88.6702	305.441	33.2323	52.1025	74.7579	73.7389	39.1438	35.0489	41.4704	22.3016	55.5254	33.7127	13.5607	4.77726	1.39272e-08	1.39272e-08	-2.81218	0.092253	1.60266	unchanged	-1.39919	0.187932	0.963837	unchanged	-1.41299	0.0406047	1.12944	down	-4.28323	C23H32N2O3	405.214	1.81172	--	--	--	--	--	--	HMDB0260029	34758-83-3	Organic compounds	Benzenoids	Benzene and substituted derivatives	Benzylethers	Animals
neg_1730	Alaptide	1.76095	1.39272e-08	6.39948	1.39272e-08	1.39272e-08	1.39272e-08	1.39272e-08	1.39272e-08	1.39272e-08	1.39272e-08	1.39272e-08	1.39272e-08	1.39272e-08	1.39272e-08	1.39272e-08	1.39272e-08	1.39272e-08	-26.8042	0.258358	1.15667	unchanged	-26.8042	0.258358	0.852702	unchanged	0	1	0	unchanged	-5.80391	C9H14N2O2	181.097	1.81887	--	--	--	--	--	--	HMDB0248111	90058-29-0	Organic compounds	Organic acids and derivatives	Carboxylic acids and derivatives	Amino acids, peptides, and analogues	Animals
neg_1734	Paramethadione	1.39272e-08	1.39272e-08	1.39272e-08	1.39272e-08	1.39272e-08	4.09105	5.75523	9.28691	1.39272e-08	1.39272e-08	1.39272e-08	1.39272e-08	1.39272e-08	45.5918	8.12207	1.39272e-08	1.39272e-08	29.2598	0.283131	0.804773	unchanged	27.7706	0.0999338	0.912497	unchanged	1.48922	0.480458	0.430267	unchanged	8.181	C7H11NO3	156.068	1.82602	C07411	--	--	--	--	--	HMDB0014755	115-67-3	Organic compounds	Organoheterocyclic compounds	Azolidines	Oxazolidines	Animals
neg_1737	Hydroxyprolyl-Proline	1.98105	1.39272e-08	1.39272e-08	6.72448	1.39272e-08	3.98611	23.5606	3.98665	1.39272e-08	1.39272e-08	3.54693	5.39253	15.1256	4.28248	10.5895	9.06981	1.39272e-08	2.08947	0.0555633	1.49445	unchanged	1.74762	0.326056	0.583253	unchanged	0.341845	0.720782	0.246128	unchanged	13.2781	C10H16N2O4	227.107	1.83318	--	--	--	--	--	--	HMDB0028871	--	Organic compounds	Organic acids and derivatives	Carboxylic acids and derivatives	Amino acids, peptides, and analogues	Animals
neg_1747	Glutamylleucine	1.39272e-08	1.39272e-08	1.39272e-08	1.39272e-08	1.39272e-08	1.39272e-08	1.39272e-08	1.39272e-08	1.39272e-08	1.39272e-08	3.66805	1.39272e-08	1.39272e-08	19.2645	1.39272e-08	1.39272e-08	1.39272e-08	27.7804	0.363217	0.65936	unchanged	25.3876	0.363217	0.500091	unchanged	2.39286	0.460177	0.440546	unchanged	6.6898	C11H20N2O5	259.132	1.84747	--	--	--	--	--	--	HMDB0028823	5969-52-8	Organic compounds	Organic acids and derivatives	Carboxylic acids and derivatives	Amino acids, peptides, and analogues	Animals
neg_1751	4-ethylamino-6-isopropylamino-1,3,5-triazin-2-ol	4558.64	4018.83	8106.88	3517.62	5359.21	4080.26	3980.7	3591.51	3402.06	3824.18	3738.4	2927.8	3631.53	2953.29	3677.66	2848.64	2796.79	-0.703519	0.0701429	1.65849	unchanged	-0.439574	0.172559	0.976725	unchanged	-0.263945	0.0109829	1.36846	down	14.4458	C8H15N5O	218.105	1.86177	C06552	Metabolic pathways(ko01100)	--	--	--	--	HMDB0062766	2163-68-0	Organic compounds	Organoheterocyclic compounds	Triazines	1,3,5-triazines	Animals
neg_1757	Deacetylisoipecoside	1.39272e-08	1.39272e-08	1.39272e-08	1.39272e-08	1.39272e-08	1.39272e-08	1.39272e-08	1.39272e-08	1.39272e-08	1.39272e-08	1.39272e-08	1.39272e-08	1.39272e-08	1.39272e-08	1.39272e-08	1.39272e-08	1.39272e-08	0	1	0	unchanged	0	1	0	unchanged	0	1	0	unchanged	-5.35729	C25H33NO11	1091.4	1.86892	--	--	--	--	--	--	--	--	--	--	--	--	--
neg_1759	(8Z,11Z,14Z,17Z,20Z,23Z)-Hexacosahexaenoyl-CoA	1.39272e-08	1.39272e-08	5.4972	1.39272e-08	1.39272e-08	1.39272e-08	1.39272e-08	1.39272e-08	1.39272e-08	1.39272e-08	1.39272e-08	0.360715	1.39272e-08	1.39272e-08	1.39272e-08	1.39272e-08	1.39272e-08	-4.1928	0.398366	0.902983	unchanged	-26.2343	0.373901	0.694701	unchanged	22.0415	0.363217	0.616194	unchanged	19.574	C47H74N7O17P3S	1178.43	1.86892	--	--	--	--	--	--	--	--	--	--	--	--	--
neg_1761	L-Dopachrome	72.3889	61.948	160.29	1.39272e-08	3.11911	34.9372	29.5744	8.80188	9.44888	11.6258	5.0135	13.2386	13.2134	74.6495	4.50163	20.4066	26.7004	-1.22632	0.320986	0.980115	unchanged	-1.84578	0.21664	0.927731	unchanged	0.619454	0.463684	0.423112	unchanged	-39.0755	C9H7NO4	227.999	1.86892	C01693	Tyrosine metabolism(ko00350);;Metabolic pathways(ko01100)	--	--	--	--	HMDB0001430	89762-39-0	Organic compounds	Organic acids and derivatives	Carboxylic acids and derivatives	Amino acids, peptides, and analogues	Animals
neg_1763	Chromozym PL	1.39272e-08	1.39272e-08	1.39272e-08	1.39272e-08	1.39272e-08	1.39272e-08	1.39272e-08	1.39272e-08	1.39272e-08	1.39272e-08	1.39272e-08	1.39272e-08	1.39272e-08	1.39272e-08	1.39272e-08	1.39272e-08	1.39272e-08	0	1	0	unchanged	0	1	0	unchanged	0	1	0	unchanged	-0.737915	C26H34N6O7S	1193.44	1.87607	--	--	--	--	--	--	HMDB0250215	--	Organic compounds	Organic acids and derivatives	Carboxylic acids and derivatives	Amino acids, peptides, and analogues	Animals
neg_1767	Pantothenol	608.816	571.219	824.022	713.443	747.886	1029.54	1275.24	892.019	673.887	1456.76	1067.44	571.134	1079.72	497.679	691.778	636.886	1383.24	0.225035	0.461282	0.611987	unchanged	0.620871	0.0198285	1.26839	up	-0.395836	0.189262	0.805917	unchanged	8.2181	C9H19NO4	204.126	1.89037	--	--	--	--	--	--	HMDB0304820	--	Organic compounds	Lipids and lipid-like molecules	Fatty Acyls	Fatty amides	Animals
neg_1774	Pymetrozine	1.39272e-08	1.39272e-08	1.39272e-08	1.39272e-08	1.39272e-08	1.39272e-08	1.39272e-08	1.39272e-08	1.39272e-08	1.39272e-08	1.39272e-08	1.39272e-08	1.39272e-08	1.39272e-08	1.39272e-08	1.39272e-08	1.39272e-08	0	1	0	unchanged	0	1	0	unchanged	0	1	0	unchanged	-0.137081	C10H11N5O	216.089	1.90467	--	--	--	--	--	--	HMDB0256932	--	Organic compounds	Organoheterocyclic compounds	Triazines	1,2,4-triazines	Animals
neg_178	L-Lysine monohydrochloride	4685.4	3052.94	4110.8	2396.69	2444.8	3307.1	3320.85	2972.06	2844.99	2989.54	2863.41	3251.31	3234.89	2170.76	1580.1	2605.86	2294.16	-0.403987	0.169655	1.22955	unchanged	-0.130392	0.56664	0.450095	unchanged	-0.273594	0.107466	0.9731	unchanged	12.4902	C6H14N2O2	145.1	0.548067	--	--	--	--	--	--	--	--	--	--	--	--	--
neg_1780	Cycloartocarpin	1.39272e-08	1.39272e-08	1.39272e-08	1.39272e-08	1.39272e-08	1.39272e-08	1.39272e-08	1.39272e-08	1.39272e-08	1.39272e-08	1.39272e-08	1.39272e-08	1.39272e-08	1.39272e-08	1.39272e-08	1.39272e-08	1.39272e-08	0	1	0	unchanged	0	1	0	unchanged	0	1	0	unchanged	-1.24903	C26H26O6	913.343	1.90467	--	--	LMPK12110936	Polyketides [PK]	Flavonoids [PK12]	Flavones and Flavonols [PK1211]	HMDB0041166	156127-37-6	Organic compounds	Phenylpropanoids and polyketides	Flavonoids	Pyranoflavonoids	Animals
neg_1781	PI(18:3(6Z,9Z,12Z)/6 keto-PGF1alpha)	1.39272e-08	1.39272e-08	1.39272e-08	1.39272e-08	1.39272e-08	1.39272e-08	1.39272e-08	1.39272e-08	1.39272e-08	1.39272e-08	1.39272e-08	1.39272e-08	1.39272e-08	1.39272e-08	1.39272e-08	1.39272e-08	1.39272e-08	0	1	0	unchanged	0	1	0	unchanged	0	1	0	unchanged	-0.345866	C47H79O17P	967.48	1.90467	--	--	--	--	--	--	HMDB0276783	--	_	_	_	_	Animals
neg_1785	16-Deacetylgeyerline	1.39272e-08	1.39272e-08	1.39272e-08	1.39272e-08	1.39272e-08	1.39272e-08	1.39272e-08	1.39272e-08	1.39272e-08	1.39272e-08	1.39272e-08	1.39272e-08	1.39272e-08	1.39272e-08	1.39272e-08	1.39272e-08	1.39272e-08	0	1	0	unchanged	0	1	0	unchanged	0	1	0	unchanged	0.557693	C36H48N2O10	689.306	1.91897	--	--	--	--	--	--	--	--	--	--	--	--	--
neg_1789	PS(18:1(9Z)/PGE2)	1.39272e-08	1.39272e-08	1.39272e-08	1.39272e-08	1.39272e-08	1.39272e-08	1.39272e-08	1.39272e-08	1.39272e-08	1.39272e-08	1.39272e-08	1.39272e-08	1.39272e-08	1.39272e-08	1.39272e-08	1.39272e-08	1.39272e-08	0	1	0	unchanged	0	1	0	unchanged	0	1	0	unchanged	-0.489438	C44H76NO13P	892.474	1.93327	--	--	--	--	--	--	HMDB0281550	--	_	_	_	_	Animals
neg_1793	Gliadins	1.39272e-08	1.39272e-08	1.39272e-08	1.39272e-08	1.39272e-08	1.39272e-08	1.39272e-08	1.39272e-08	1.39272e-08	1.39272e-08	1.39272e-08	1.39272e-08	1.39272e-08	1.39272e-08	1.39272e-08	1.39272e-08	1.39272e-08	0	1	0	unchanged	0	1	0	unchanged	0	1	0	unchanged	7.8347	C29H41N7O9	676.3	1.94043	--	--	--	--	--	--	HMDB0252744	--	Organic compounds	Organic acids and derivatives	Carboxylic acids and derivatives	Amino acids, peptides, and analogues	Animals
neg_1795	Threonylisoleucine	75.2239	37.1905	65.781	32.2075	1.39272e-08	61.547	44.866	44.7837	47.4854	52.0935	27.3668	30.7479	25.8074	71.9497	76.6348	20.9433	7.33655	-0.113262	0.861771	0.151763	unchanged	0.139634	0.773904	0.138842	unchanged	-0.252897	0.571731	0.361854	unchanged	2.68536	C10H20N2O4	231.136	1.94757	--	--	--	--	--	--	HMDB0029064	129050-49-3	Organic compounds	Organic acids and derivatives	Carboxylic acids and derivatives	Amino acids, peptides, and analogues	Animals
neg_1798	CDP-DG(i-12:0/i-16:0)	1.39272e-08	1.39272e-08	1.39272e-08	1.39272e-08	1.39272e-08	1.39272e-08	1.39272e-08	1.39272e-08	1.39272e-08	1.39272e-08	1.39272e-08	1.39272e-08	1.39272e-08	1.39272e-08	1.39272e-08	1.39272e-08	1.39272e-08	0	1	0	unchanged	0	1	0	unchanged	0	1	0	unchanged	7.06807	C40H73N3O15P2	918.433	1.95472	--	--	--	--	--	--	HMDB0116161	--	Organic compounds	Lipids and lipid-like molecules	Glycerophospholipids	CDP-glycerols	Animals
neg_1800	Phorbolol myristate acetate	1.39272e-08	1.39272e-08	1.39272e-08	1.39272e-08	1.39272e-08	1.39272e-08	1.39272e-08	1.39272e-08	1.39272e-08	1.39272e-08	1.39272e-08	1.39272e-08	1.39272e-08	1.39272e-08	1.39272e-08	1.39272e-08	1.39272e-08	0	1	0	unchanged	0	1	0	unchanged	0	1	0	unchanged	-10.5649	C36H58O8	639.381	1.96902	--	--	--	--	--	--	HMDB0256460	--	Organic compounds	Lipids and lipid-like molecules	Prenol lipids	Diterpenoids	Animals
neg_1803	Methyldopa	1.39272e-08	1.39272e-08	1.39272e-08	1.39272e-08	1.39272e-08	2.04023	5.3262	1.39272e-08	1.39272e-08	1.39272e-08	3.41331	1.39272e-08	1.39272e-08	3.10411	1.39272e-08	1.39272e-08	1.39272e-08	25.1467	0.363217	0.65936	unchanged	26.9428	0.105189	0.919419	unchanged	-1.79607	0.256564	0.702334	unchanged	0.908677	C10H13NO4	210.077	1.98332	--	--	--	--	--	--	HMDB0251525	--	Organic compounds	Phenylpropanoids and polyketides	Phenylpropanoic acids	_	Animals
neg_1811	6-Hydroxy-3,4-dihydro-2(1H)-quinolinone	2556.71	2079.08	2596.65	583.854	755.799	4097.38	4048.55	3632.34	3654.61	3989.37	3728.19	1337.02	1375.75	4517.3	1440.56	1204.79	931.306	0.0711766	0.90432	0.0477627	unchanged	1.17029	0.00708948	1.51478	up	-1.09911	0.0127455	1.49007	down	13.3482	C9H9NO2	208.064	1.99047	--	--	--	--	--	--	HMDB0246939	--	Organic compounds	Organoheterocyclic compounds	Quinolines and derivatives	Quinolones and derivatives	Animals
neg_1818	DG(18:2n6/0:0/18:4n3)	30.1014	368.111	53.9872	368.553	32.8308	39.6837	56.2844	12.237	106.27	45.2451	1.39272e-08	75.0511	11.8731	58.8633	26.0893	1.39272e-08	9.39958	-2.49837	0.15746	1.28422	unchanged	-1.97961	0.191355	0.887888	unchanged	-0.518767	0.52045	0.420763	unchanged	-13.0888	C40H66O5	661.452	10.0216	--	--	--	--	--	--	HMDB0056291	--	Organic compounds	Lipids and lipid-like molecules	Glycerolipids	Diradylglycerols	Animals
neg_1819	Triamcinolone acetonide 21-palmitate	56.4349	108.535	169.933	827.406	178.7	23.3798	63.0419	58.1299	1.39272e-08	109.496	43.2412	49.5488	133.98	49.0177	83.8454	66.5091	113.687	-1.69623	0.261081	1.062	unchanged	-2.43641	0.197789	0.826461	unchanged	0.740184	0.14339	0.858169	unchanged	-10.7151	C40H61FO7	693.408	10.0216	--	--	--	--	--	--	HMDB0259146	--	Organic compounds	Lipids and lipid-like molecules	Steroids and steroid derivatives	Pregnane steroids	Animals
neg_1822	DG(14:1(9Z)/20:5(5Z,8Z,11Z,14Z,17Z)/0:0)	4821.92	1327.99	2275.48	3271.21	3223.92	116.693	135.065	1.39272e-08	1743.47	1.39272e-08	37.1668	91.2934	1.39272e-08	16.4331	79.8578	68.1843	37.2128	-5.93338	0.00722468	2.17404	down	-3.13908	0.00677357	1.44066	down	-2.7943	0.351332	0.619752	unchanged	2.62491	C37H60O5	629.444	10.0296	--	--	LMGL02010417	Glycerolipids [GL]	Diradylglycerols [GL02]	Diacylglycerols [GL0201]	HMDB0007056	--	Organic compounds	Lipids and lipid-like molecules	Glycerolipids	Diradylglycerols	Animals
neg_1830	Goyaglycoside a	86.1448	1599.51	57.82	3276.93	780.515	170.896	234.969	247.393	276.964	180.451	107.994	207.028	122.932	97.6751	121.926	170.231	79.6416	-3.12227	0.161858	1.28329	unchanged	-2.51401	0.185647	0.86829	unchanged	-0.608253	0.0540426	1.08827	unchanged	2.47995	C37H60O9	669.4	10.0375	--	--	--	--	--	--	HMDB0038348	333332-41-5	Organic compounds	Lipids and lipid-like molecules	Steroids and steroid derivatives	Steroidal glycosides	Animals
neg_1845	3-hydroxypristanic acid	11.4486	27.0863	11.4581	12.1357	13.9531	15.4188	9.61826	1.39272e-08	23.2656	11.6042	1.39272e-08	6.47306	1.39272e-08	43.8584	1.39272e-08	1.39272e-08	50.5913	0.144596	0.879802	0.0866576	unchanged	-0.607864	0.300069	0.617771	unchanged	0.75246	0.533276	0.344466	unchanged	-14.7477	C19H38O3	313.27	10.0694	--	--	--	--	--	--	HMDB0061651	--	Organic compounds	Lipids and lipid-like molecules	Prenol lipids	Diterpenoids	Animals
neg_1848	DG(18:0/22:6(5Z,8E,10Z,13Z,15E,19Z)-2OH(7S, 17S)/0:0)	138998	194758	602749	317407	997347	12497.1	7356.21	16788.1	76466.6	43777.6	8763.95	3120.41	1308.2	5473.71	10970.2	19243.3	12919.3	-5.67067	0.049545	1.78956	down	-4.02756	0.0558063	1.22683	unchanged	-1.64311	0.15816	0.925849	unchanged	-5.68801	C43H72O7	699.517	10.0773	--	--	--	--	--	--	HMDB0295951	--	_	_	_	_	Animals
neg_185	(2R)-O-Phospho-3-sulfolactate	858.719	815.286	1938.64	639.981	596.237	541.159	686.846	537.164	602.314	640.653	586.485	494.186	551.854	496.195	1776.63	630.946	989.772	-0.236292	0.660155	0.350964	unchanged	-0.69484	0.208721	0.937842	unchanged	0.458548	0.326032	0.63551	unchanged	8.29429	C3H7O9PS	294.955	0.548067	--	--	--	--	--	--	--	--	--	--	--	--	--
neg_1858	16-phenoxy tetranor Prostaglandin A2	8259.33	6724.6	1956.89	6260.46	3224.67	13060.4	13304.8	11024.2	9358.57	10175.9	9556.92	6059.55	7581.81	7065.78	6871.23	5201.4	2894.32	0.169887	0.642587	0.484114	unchanged	1.06795	0.00411964	1.49428	up	-0.898061	0.000422048	1.63343	down	13.2775	C22H26O5	369.176	10.1248	--	--	--	--	--	--	--	--	--	--	--	--	--
neg_1865	Eicosen-1-ol	82.8029	78.3647	47.2648	203.998	285.76	106.116	25.5302	27.8	26.1985	15.7663	29.6661	545.527	206.966	86.4114	261.892	169.913	96.6279	0.706642	0.315322	0.722916	unchanged	-1.85828	0.0886819	1.02014	unchanged	2.56492	0.0401134	1.28963	up	4.57442	C20H40O	341.307	10.1486	--	--	--	--	--	--	HMDB0303126	--	Organic compounds	Organic oxygen compounds	Organooxygen compounds	Enols	Animals
neg_1885	PA(8:0/PGE2)	23670.3	15696	34089.4	25611.4	20668.2	53394.3	37366.9	42276.8	29092.7	29265.9	26626.3	31005.7	30126.7	22774.8	31768.6	26394.3	23842.2	0.207536	0.319812	0.80758	unchanged	0.601595	0.0410618	1.06957	up	-0.394059	0.0968367	0.968443	unchanged	-7.01563	C31H53O11P	653.303	10.225	--	--	--	--	--	--	HMDB0266611	--	_	_	_	_	Animals
neg_1890	Ascorbyl palmitate	4845.25	5953.71	7070.16	5572.89	5047.69	7553.75	8913.59	5891.06	5564.18	6093.54	4786.41	8082.22	8350.26	5384.44	6301.96	6267.64	6910.29	0.272556	0.0848126	1.26632	unchanged	0.182677	0.321436	0.544091	unchanged	0.089879	0.602348	0.347669	unchanged	-6.33534	C22H38O7	887.532	10.2642	--	--	LMFA07010788	Fatty Acyls [FA]	Fatty esters [FA07]	Wax monoesters [FA0701]	HMDB0039883	137-66-6	Organic compounds	Lipids and lipid-like molecules	Fatty Acyls	Fatty acid esters	Animals
neg_1892	Soyacerebroside I	69.2378	354.655	214.815	257.32	33.004	127.85	40.441	48.1027	134.168	73.6957	120.707	32.1613	76.8858	59.4963	56.8379	75.4732	31.8908	-1.74434	0.0942646	1.49213	unchanged	-1.0326	0.191229	0.930531	unchanged	-0.711744	0.103435	0.997898	unchanged	-12.3584	C40H75NO9	758.534	10.2719	--	--	--	--	--	--	HMDB0032677	114297-20-0	Organic compounds	Lipids and lipid-like molecules	Sphingolipids	Glycosphingolipids	Animals
neg_1894	NORETHINDRONE ACETATE	113164	129304	170771	134803	161116	164449	175247	144589	124353	151899	164777	130475	134978	122618	136765	114485	163002	-0.0849569	0.538826	0.572647	unchanged	0.120804	0.36758	0.556145	unchanged	-0.205761	0.0685489	1.03663	unchanged	13.6806	C22H28O3	339.201	10.2875	--	--	--	--	--	--	HMDB0255731	51-98-9	Organic compounds	Lipids and lipid-like molecules	Steroids and steroid derivatives	Steroid esters	Animals
neg_1895	DG(12:0/22:6(4Z,7Z,11E,13Z,15E,19Z)-2OH(10S,17)/0:0)	182.859	272.31	63.6628	172.709	84.4782	321.103	274.451	239.605	206.921	286.565	76.3262	280.737	126.314	169.958	26.0007	37.9825	11.8938	-0.512294	0.435948	0.689025	unchanged	0.593344	0.16126	0.820233	unchanged	-1.10564	0.0484408	1.11503	down	0.286413	C37H60O7	615.427	10.2954	--	--	--	--	--	--	HMDB0294781	--	_	_	_	_	Animals
neg_1899	DG(17:0/22:6(4Z,7Z,10Z,12E,16Z,19Z)-OH(14)/0:0)	12947	18982.2	13487.6	15013.1	37095.7	1732.07	995.606	1203.68	2758.99	1796.4	2433.21	1000.74	653.306	691.155	1895.63	680.313	416.234	-4.45462	0.0145805	2.03509	down	-3.42185	0.0172485	1.43567	down	-1.03277	0.0257746	1.24047	down	9.27862	C42H70O6	691.498	10.3186	--	--	--	--	--	--	HMDB0295767	--	_	_	_	_	Animals
neg_1901	CL(i-14:0/i-12:0/i-12:0/i-12:0)	1.39272e-08	1.39272e-08	296.876	1.39272e-08	20.4595	1.39272e-08	1.39272e-08	14.7136	1.39272e-08	514.383	180.994	1.39272e-08	1.39272e-08	1.39272e-08	1.39272e-08	1.39272e-08	1.39272e-08	-32.0855	0.338879	0.999377	unchanged	0.898961	0.606606	0.30548	unchanged	-32.9844	0.219616	0.819411	unchanged	7.734	C59H114O17P2	1155.75	10.3342	--	--	--	--	--	--	--	--	--	--	--	--	--
neg_1920	cis-Reticulatacin-10-one	926.621	470396	2283.43	894856	866329	2114.25	2222.51	7903.99	14503	9863.99	7729.23	1127.92	984.599	8951.99	6380.87	6579.68	2503.77	-6.65947	0.0876481	1.5391	unchanged	-5.91852	0.0891257	1.07469	unchanged	-0.740948	0.240116	0.752711	unchanged	18.9426	C37H66O6	651.496	10.3652	--	--	--	--	--	--	HMDB0034967	205439-33-4	Organic compounds	Lipids and lipid-like molecules	Fatty Acyls	Fatty alcohols	Animals
neg_1923	Pristanal	96.1448	100.88	135.888	166.104	229.924	133.977	118.557	107.361	135.409	141.874	51.3823	204.052	46.3754	110.993	59.6386	159.612	209.716	-0.146276	0.719366	0.411327	unchanged	-0.345252	0.309751	0.567495	unchanged	0.198977	0.611387	0.301852	unchanged	3.83021	C19H38O	327.292	10.3961	--	--	LMPR0104010012	Prenol Lipids [PR]	Isoprenoids [PR01]	C20 isoprenoids (diterpenes) [PR0104]	HMDB0001958	105373-75-9	Organic compounds	Lipids and lipid-like molecules	Prenol lipids	Diterpenoids	Animals
neg_1924	3-Hydroxy-1-phenyl-1-octadecanone	51.327	82.4709	21.1239	24.6564	1.39272e-08	57.7365	55.6819	30.4505	1.39272e-08	1.39272e-08	0.767272	1.39272e-08	0.225901	46.7958	1.39272e-08	1.39272e-08	1.39272e-08	-2.19625	0.131498	1.24633	unchanged	-0.575218	0.534347	0.429937	unchanged	-1.62103	0.268505	0.669473	unchanged	8.823	C24H40O2	395.275	10.3961	--	--	--	--	--	--	HMDB0035680	--	Organic compounds	Lipids and lipid-like molecules	Fatty Acyls	Fatty alcohols	Animals
neg_1928	SM(d18:0/12:0)	43.2609	291.482	63.7548	457.845	57.9522	93.6272	37.9558	14.2906	66.2737	35.8044	1.39272e-08	35.4081	1.39272e-08	70.2452	10.7889	1.39272e-08	50.635	-2.71518	0.134189	1.36706	unchanged	-2.14564	0.162785	0.925486	unchanged	-0.569545	0.478906	0.467976	unchanged	-3.12493	C35H75N2O6P	671.509	10.4271	C00550	--	--	--	--	--	HMDB0012084	--	Organic compounds	Lipids and lipid-like molecules	Sphingolipids	Phosphosphingolipids	Animals
neg_1933	Zymonic acid	190665	213451	238733	229377	247209	228406	222606	217656	210054	208484	201486	211035	227407	178440	196511	194775	211399	-0.13944	0.13203	1.24881	unchanged	-0.0598987	0.435863	0.500905	unchanged	-0.0795409	0.189268	0.764639	unchanged	19.9291	C6H6O5	192.994	10.4588	--	--	--	--	--	--	HMDB0031210	24891-71-2	Organic compounds	Organoheterocyclic compounds	Dihydrofurans	Furanones	Animals
neg_1934	5-Hydroxymaltol	27820.1	31214.8	35724.5	33663.6	35496.3	33355.9	32314.4	32275	31054.8	30350.5	29209.6	30997.7	33446.8	25715.5	28823.5	28387.9	31517.9	-0.136952	0.148891	1.19508	unchanged	-0.0609939	0.433717	0.517308	unchanged	-0.0759585	0.242566	0.682855	unchanged	-0.534236	C6H6O4	163.001	10.4588	--	--	--	--	--	--	HMDB0032988	1073-96-7	Organic compounds	Organoheterocyclic compounds	Pyrans	Pyranones and derivatives	Microbe,Animals,Plants
neg_1936	5-Hydroxyisourate	60116.9	64866.7	73679.4	69758.8	76519.6	71323.2	69423.6	67955.6	65672.5	65072.7	64344	66270.4	71562.2	55960.8	61517.6	62624.9	68599.6	-0.0987851	0.256248	0.960751	unchanged	-0.0357751	0.615406	0.320472	unchanged	-0.06301	0.292296	0.621466	unchanged	6.17559	C5H4N4O4	218.994	10.4588	--	--	--	--	--	--	--	--	--	--	--	--	--
neg_1938	Chinenoside V	195.874	533.261	584.829	362.125	422.616	564.913	250.233	121.449	54.6742	40.9393	25.1676	108.233	174.932	28.2526	46.0917	14.9882	38.6428	-2.61483	0.00461877	2.13564	down	-1.25205	0.052477	1.08554	unchanged	-1.36279	0.269618	0.669742	unchanged	1.80404	C45H72O19	961.467	10.4588	--	--	--	--	--	--	--	--	--	--	--	--	--
neg_1943	Isomaltol	77971	85002.1	98092.8	91805.2	99620.6	92989.9	90684.8	89514.7	85012.7	84525.8	81722.6	86413.2	93122.6	73356	79894.6	79762.8	88208	-0.116815	0.198364	1.09283	unchanged	-0.0501194	0.513451	0.422729	unchanged	-0.0666952	0.277402	0.633176	unchanged	-10.2185	C6H6O3	170.992	10.4669	--	--	--	--	--	--	HMDB0303336	3420-59-5	Organic compounds	Organic oxygen compounds	Organooxygen compounds	Carbonyl compounds	Animals
neg_1952	Barbiturate	5345.65	5741.11	6613.31	6224.13	6830.82	6316.45	6337.63	5915.94	5881.43	5829.01	5566.48	5896.1	6314.06	4920.76	5349.28	5553.55	5859.78	-0.122846	0.177401	1.13982	unchanged	-0.0420066	0.578975	0.344425	unchanged	-0.080839	0.198058	0.757152	unchanged	-6.30957	C4H4N2O3	148.996	10.4669	C00813	Pyrimidine metabolism(ko00240);;Metabolic pathways(ko01100)	--	--	--	--	HMDB0041833	67-52-7	Organic compounds	Organoheterocyclic compounds	Diazines	Pyrimidines and pyrimidine derivatives	Animals
neg_1954	4-Hydroxyphthalide	13608.2	15465.1	17255.4	16854.1	18448.3	16718	16017	15440.4	15225.5	14892.2	14492.1	15063.1	16416.7	12385.5	13998.3	14513.3	15595.6	-0.1551	0.140293	1.2184	unchanged	-0.0782566	0.376324	0.562173	unchanged	-0.0768437	0.257267	0.668135	unchanged	5.88285	C8H6O3	185.002	10.4749	--	--	--	--	--	--	HMDB0032598	13161-32-5	Organic compounds	Organoheterocyclic compounds	Isocoumarans	Isobenzofuranones	Animals
neg_1955	Allo-hydroxycitric acid lactone	57570.6	63430.3	73130.7	67649.6	74665.6	69300.4	67663.7	66576.5	63440.7	62998.4	60840	65155.6	69549	54110.7	59930.7	59313.6	65729.8	-0.111188	0.235885	1.0155	unchanged	-0.0469101	0.553604	0.385876	unchanged	-0.0642777	0.309976	0.590634	unchanged	-20.9907	C6H6O7	189	10.4669	--	--	--	--	--	--	HMDB0259498	--	Organic compounds	Organic acids and derivatives	Carboxylic acids and derivatives	Tricarboxylic acids and derivatives	Animals
neg_1957	2-Carboxy-2,5-dihydro-5-oxofuran-2-acetate	50477.9	55065.9	61545	60306	65577.8	60140	58677.9	57316.1	56351.3	55586	54601.4	55985.3	59816.4	46904.6	52183	52486.3	56625.3	-0.117803	0.19284	1.09666	unchanged	-0.0369689	0.615457	0.311459	unchanged	-0.0808341	0.165964	0.817888	unchanged	29.6826	C7H6O6	220.991	10.4669	--	--	--	--	--	--	--	--	--	--	--	--	--
neg_1959	7-Hydroxy-4-(trifluoromethyl)coumarin	119184	131096	149805	140402	152918	143583	139479	136534	129752	128746	125255	134447	143524	112168	121908	122924	135428	-0.111128	0.22202	1.04007	unchanged	-0.05071	0.510863	0.423037	unchanged	-0.0604182	0.344375	0.548453	unchanged	16.7319	C10H5F3O3	250.998	10.4669	--	--	--	--	--	--	HMDB0247257	--	Organic compounds	Phenylpropanoids and polyketides	Coumarins and derivatives	Hydroxycoumarins	Animals
neg_1962	Fallypride	12516.6	8586.41	4539.46	18265.4	7999	20082.6	19948.3	23805.6	21265.1	22716.8	14161.2	13252.6	9585.16	27215.5	18230.5	19242.5	6988.23	0.601576	0.192788	1.01546	unchanged	0.969609	0.00890605	1.44979	up	-0.368034	0.208526	0.79461	unchanged	4.77333	C20H29FN2O3	787.376	10.4669	--	--	--	--	--	--	HMDB0252161	--	Organic compounds	Benzenoids	Benzene and substituted derivatives	Methoxybenzenes	Animals
neg_1971	Isopentyl gentiobioside	8845.33	7658.07	4463.96	11407.9	7475.25	12505.8	12833.1	12906	11866.7	12230.3	8734.75	8835.8	7395.59	13287.8	9787.05	10342.2	5486.11	0.205326	0.456102	0.621499	unchanged	0.571746	0.021938	1.34573	up	-0.366419	0.0682105	1.08104	unchanged	-1.39285	C17H32O11	411.187	10.4669	--	--	--	--	--	--	HMDB0041512	178275-89-3	Organic compounds	Lipids and lipid-like molecules	Fatty Acyls	Fatty acyl glycosides	Animals
neg_1972	Hydromorphone-3-glucoside	8683.31	6956.57	4105.75	12095.2	8003.48	13332.1	13038.8	12917.2	11927	12719.9	9492.74	9510.79	8281.96	13222.4	10334.9	10984.5	6691.25	0.303939	0.275183	0.925	unchanged	0.618918	0.0258542	1.36897	up	-0.314979	0.0569742	1.11585	unchanged	9.67699	C23H29NO8	468.168	10.4669	--	--	--	--	--	--	HMDB0061144	--	Organic compounds	Alkaloids and derivatives	Morphinans	_	Animals
neg_1988	1,2-Di-(9Z,12Z,15Z-octadecatrienoyl)-3-(Galactosyl-alpha-1-6-Galactosyl-beta-1)-glycerol	150.167	239.178	427.641	144.995	104.189	206.017	297.12	214.728	347.941	2550.24	1045.25	88.2267	9101.64	10445.7	433.969	68.25	238.284	3.99333	0.176857	1.06163	unchanged	1.86526	0.197358	0.762386	unchanged	2.12807	0.256041	0.692978	unchanged	-5.64217	C51H84O15	981.574	10.5383	--	--	--	--	--	--	HMDB0011127	--	Organic compounds	Lipids and lipid-like molecules	Glycerolipids	Glycosylglycerols	Animals
neg_1995	Dihydromycoplanecin A	1.39272e-08	1.39272e-08	1.39272e-08	1.39272e-08	1.39272e-08	0.359018	1.39272e-08	56.5387	1.39272e-08	0.0832752	1.39272e-08	0.0820791	0.242637	0.00550049	1.39272e-08	1.39272e-08	1.39272e-08	21.914	0.225061	0.967745	unchanged	29.345	0.359114	0.493828	unchanged	-7.43093	0.36167	0.53874	unchanged	13.4949	C61H104N10O13	1183.79	10.568	--	--	--	--	--	--	HMDB0251320	--	Organic compounds	Organic acids and derivatives	Peptidomimetics	Depsipeptides	Animals
neg_2008	6-Methylgingediol	1.39272e-08	48.2801	1.39272e-08	9.41479	1.32908	3.04617	3.15697	1.39272e-08	0.00236241	1.39272e-08	1.39272e-08	4.94973	3.07464	1.39272e-08	1.39272e-08	1.39272e-08	1.39272e-08	-3.14187	0.323557	0.871435	unchanged	-3.51272	0.311074	0.74672	unchanged	0.370842	0.788221	0.204662	unchanged	4.30228	C18H30O4	619.424	10.5839	--	--	--	--	--	--	HMDB0303099	--	Organic compounds	Benzenoids	Benzene and substituted derivatives	Methoxybenzenes	Animals
neg_2014	DG(17:0/20:3(5Z,8Z,11Z)-O(14R,15S)/0:0)	6388.05	1.96079e+06	74305.9	2.32568e+06	5.2044e+06	1415.8	3156.07	20477.7	64718.1	49975	34075.6	2419.69	806.706	13369.5	37594.7	28499.2	64780.6	-6.28329	0.11735	1.4248	unchanged	-6.04614	0.117972	0.995775	unchanged	-0.237154	0.766754	0.227491	unchanged	-1.03027	C40H70O6	691.515	10.5918	--	--	--	--	--	--	HMDB0295599	--	_	_	_	_	Animals
neg_2021	(R)-Marmin	1.39272e-08	1.39272e-08	1.39272e-08	4.78508	1.39272e-08	2.79231	1.39272e-08	1.39272e-08	1.39272e-08	10.1664	1.39272e-08	1.39272e-08	1.39272e-08	1.39272e-08	1.39272e-08	1.39272e-08	1.39272e-08	-26.0341	0.373901	0.855664	unchanged	1.17427	0.54903	0.417291	unchanged	-27.2084	0.251194	0.772128	unchanged	4.86957	C19H24O5	663.321	10.6154	--	--	--	--	--	--	HMDB0030787	14957-38-1	Organic compounds	Phenylpropanoids and polyketides	Coumarins and derivatives	_	Animals
neg_2022	16, 17-dihydro-16alpha, 17-dihydroxy GA9	1.39272e-08	1.39272e-08	1.39272e-08	1.39272e-08	1.39272e-08	1.39272e-08	1.39272e-08	1.39272e-08	1.39272e-08	1.39272e-08	1.39272e-08	1.39272e-08	1.39272e-08	1.39272e-08	1.39272e-08	1.39272e-08	1.39272e-08	0	1	0	unchanged	0	1	0	unchanged	0	1	0	unchanged	-14.3048	C19H25O6-	757.334	10.6154	--	--	--	--	--	--	HMDB0304025	--	Organic compounds	Lipids and lipid-like molecules	Prenol lipids	Diterpenoids	Animals
neg_2032	Tyr Lys Arg Glu	121.282	69.6439	118.812	162.137	93.4092	83.8008	67.0884	51.0564	65.624	51.4922	45.9764	66.5012	134.586	73.7581	8.56878	55.2142	67.4152	-0.740378	0.0757244	1.39065	unchanged	-0.893965	0.0242282	1.31446	down	0.153587	0.708768	0.229638	unchanged	19.3503	C26H42N8O8	593.317	10.7002	--	--	--	--	--	--	--	--	--	--	--	--	--
neg_2036	Prostalene	9755.05	14801.5	12360.4	15433.1	14615.4	12730.7	13957.1	14436.7	10272.3	12052.5	12884.1	11308.7	10582.9	10363.3	11416.3	9299.24	11822.5	-0.310615	0.0667856	1.55867	unchanged	-0.0741346	0.597488	0.31974	unchanged	-0.23648	0.0257083	1.21605	down	10.0116	C22H36O5	425.258	10.7152	--	--	--	--	--	--	HMDB0256858	--	Organic compounds	Lipids and lipid-like molecules	Fatty Acyls	Fatty acid esters	Animals
neg_2041	2-Octaprenyl-3-methyl-6-methoxy-1,4-benzoquinone	17968.6	401707	87569.9	388097	555583	1109.59	3545.6	14678.4	16381.1	20083.5	7152.46	2472.33	2484.75	8185.58	24106.9	10810.6	11368.7	-4.8727	0.0512844	1.7107	unchanged	-4.78964	0.0515927	1.23253	unchanged	-0.0830569	0.898983	0.0999333	unchanged	9.21132	C48H72O3	717.529	10.7452	--	--	--	--	--	--	--	--	--	--	--	--	--
neg_2042	Antheraxanthin	6076.17	3531.8	2872.37	3190.57	9075.25	3258.05	3269.51	3004.99	2788.54	2709.94	2202.29	2316.18	3637.88	1664.26	2610.35	2720.21	3266	-0.872921	0.129596	1.33644	unchanged	-0.785038	0.152746	0.902334	unchanged	-0.0878828	0.619217	0.296295	unchanged	14.9703	C40H56O3	605.406	10.7678	C08579	Metabolic pathways(ko01100)	LMPR01070262	Prenol Lipids [PR]	Isoprenoids [PR01]	C40 isoprenoids (tetraterpenes) [PR0107]	--	--	--	--	--	--	--
neg_2044	N,N-Diallyl-tyrosyl-aminoisobutyryl-aminoisobutyryl-phenylalanyl-leucine	24.6901	18.3206	7.86106	17.4833	33.0728	24.8686	18.939	1.39272e-08	1.39272e-08	1.39272e-08	5.75582	1.39272e-08	17.6427	7.93966	1.39272e-08	1.39272e-08	1.39272e-08	-2.25027	0.0152367	1.74377	down	-1.29614	0.0811459	0.920694	unchanged	-0.954127	0.476571	0.434407	unchanged	-3.83701	C38H53N5O7	690.385	10.7678	--	--	--	--	--	--	HMDB0253352	--	Organic compounds	Organic acids and derivatives	Carboxylic acids and derivatives	Amino acids, peptides, and analogues	Animals
neg_2047	Febarbamate	2.61459	10.9624	6.53138	57.9553	1.39272e-08	3.20704	7.00932	1.39272e-08	1.39272e-08	1.39272e-08	1.39272e-08	0.0623066	1.39272e-08	1.39272e-08	1.39272e-08	7.95751	1.39272e-08	-3.54604	0.255837	1.06937	unchanged	-3.1968	0.266117	0.728586	unchanged	-0.34924	0.840876	0.132793	unchanged	1.35465	C20H27N3O6	809.374	10.7678	--	--	--	--	--	--	HMDB0252183	--	Organic compounds	Organoheterocyclic compounds	Diazines	Pyrimidines and pyrimidine derivatives	Animals
neg_2058	Cyclo(D-Trp-D-Asp-Pro-D-Ile-Leu)	4.22234	3.99179	14.2947	1.02349	1.39272e-08	1.39272e-08	0.442096	9.00835	0.00825184	1.39272e-08	0.828955	1.39272e-08	0.0545048	0.0291773	5.22061	1.39272e-08	1.39272e-08	-2.41245	0.213546	1.14848	unchanged	-1.45676	0.343004	0.692687	unchanged	-0.955682	0.63857	0.241442	unchanged	7.26541	C32H44N6O7	645.306	10.8206	--	--	--	--	--	--	HMDB0250629	--	Organic compounds	Organic acids and derivatives	Peptidomimetics	Hybrid peptides	Animals
[truncated: 3,989 more rows]

## Sheet: CON-CL
Differential metabolites in plasma
[truncated: 995 more rows]

## Sheet: CL-CH
Differential metabolites in plasma
[truncated: 1,005 more rows]

[truncated: 2 more sheets: CON-CH, Others]
