# Supplementary material for: Dietary-fat supplementation alleviates cold temperature-induced metabolic dysbiosis and barrier impairment by remodeling gut microbiota
Source: Royal Society of Chemistry journal article supplement (doi:10.1039/d3fo04916g), 2024-01-01
Supplement: d3fo04916g3.pdf [file d3fo04916g3.pdf]

Table S1 Compositions and ingredients of the diet

| Ingredients                      | Content (%) |                |
|----------------------------------|-------------|----------------|
|                                  | basal diet  | high n-6 PUFAs |
| Corn                             | 72.30       | 62.50          |
| Soybean meal                     | 22.00       | 14.00          |
| full-fat soybean                 | 0.00        | 15.00          |
| Soybean oil                      | 1.56        | 4.17           |
| Dicalcium phosphate              | 1.20        | 1.34           |
| Limestone                        | 0.90        | 0.90           |
| Salt                             | 0.40        | 0.40           |
| Lysine                           | 0.43        | 0.45           |
| Methionine                       | 0.06        | 0.08           |
| Threonine                        | 0.12        | 0.13           |
| Choline chloride                 | 0.03        | 0.03           |
| Premix <sup>1</sup>              | 1.00        | 1.00           |
| Total                            | 100.0       | 100.0          |
| Nutrient levels <sup>2</sup>     |             |                |
| Metabolizable energy,<br>Mcal/kg | 3.20        | 3.42           |
| Crude fat                        | 5.09        | 7.82           |
| Crude protein                    | 17.57       | 18.71          |
| Lysine                           | 0.98        | 1.06           |
| Methionine                       | 0.28        | 0.31           |
| Threonine                        | 0.60        | 0.63           |
| Tryptophan                       | 0.18        | 0.19           |
| Calcium                          | 0.66        | 0.71           |
| Available phosphorus             | 0.26        | 0.28           |
| Sodium                           | 0.17        | 0.17           |
| Chlorine                         | 0.27        | 0.27           |

<sup>1</sup> Provided the following per kilogram of diet: Fe, 140 mg; Cu, 25 mg; Mn, 35 mg; Zn, 80 mg; Se, 0.4 mg; I, 0.5 mg; vitamin A, 10, 000 IU; vitamin D, 3, 3000 IU; vitamin E, 63 mg; vitamin K3, 3 mg; vitamin B1, 3 mg; vitamin B2, 9.6 mg; vitamin B6, 4.5 mg; vitamin B12, 0.04 mg; niacin, 36 mg; d-pantothenic acid, 30 mg; d-biotin, 0.24 mg; and folate, 1.8 mg.

<sup>2</sup> Crude fat and crude protein were analyzed values, and the rest were calculated values.

Table S2 The qRT-PCR primer sequences used in this study

| Gene <sup>1</sup> | Primer sequence (5'-3')      | Accession number |
|-------------------|------------------------------|------------------|
| β-actin           | F: GGCACCACACCTTCTACAACGAG   | XM_003124280.5   |
|                   | R: TCATCTTCTCACGGTTGGCTTTGG  |                  |
| IL-1β             | F: GCCAACGTGCAGTCTATGGAGTG   | NM_214055.1      |
|                   | R: GGTGGAGAGCCTTCAGCATGTG    |                  |
| IL-4              | F: CCAGAGAACACGACGGAGAAGG    | NM_214256.1      |
|                   | R: TGCCATGCTGCTCAGGTTCC      |                  |
| IL-10             | F: CGGCCAGTGAAGAGTTTCT       | NM_214041.1      |
|                   | R: TGCCTTCGGCATTACGTCTT      |                  |
| TNF-α             | F: GCACTGAGAGCATGATCCGAGAC   | NM_214022.1      |
|                   | R: CGACCAGGAGGAAGGAGAAGAGG   |                  |
| MUC2              | F: TCCCAGGTCGAGTACATCCT      | XM_021082584.1   |
|                   | R: CTATAGTGCGGGGGGTGCTGAC    |                  |
| MUC4              | R: GGAAGTGTGAGCAGTGGAAGTTG   | XM_021068273.1   |
|                   | R: TCTCAGCAGCGTCTATACTGGTCTC |                  |

Table S3 Analysis of all differential metabolites between the three groups

CON vs. CL

Upregulated

|                                                             |                                                                                         |                                                                                              |
|-------------------------------------------------------------|-----------------------------------------------------------------------------------------|----------------------------------------------------------------------------------------------|
| Asparaginy-Phenylalanine                                    | PG(i-24:0/20:3(5Z,8Z,11Z)-O(14R,15S))                                                   | cis-3-Decene                                                                                 |
| 3-Hydroxynorvaline                                          | 28-Glucosyloleanolic acid 3-[arabinosyl-(1->2)-6-methylglucuronide]                     | Rumenic acid                                                                                 |
| Deoxyribose                                                 | CL(8:0/11:0/11:0/11:0)                                                                  | Galactosyl 4-hydroxyproline                                                                  |
| 3-Dehydroquinic acid                                        | Dehydroxypaxilline                                                                      | L-2-Aminoethyl seryl phosphate                                                               |
| dioxybenzone                                                | PE-NMe2(22:4(7Z,10Z,13Z,16Z)/22:5(4Z,7Z,10Z,13Z,16Z))                                   | 3,6-Nonadienal                                                                               |
| Olprinone                                                   | PI(18:0/PGF2alpha)                                                                      | 3-Palmitoylcatechin                                                                          |
| Lividomycin A                                               | PS(22:1(13Z)/16:0)                                                                      | Prallethrin                                                                                  |
| D-Glucono-1,5-lactone 6-phosphate                           | PI(16:0/PGF1alpha)                                                                      | 3-ketosphingosine                                                                            |
| 2',4-Dihydroxy-4',6'-dimethoxychalcone                      | Hydroxyspheroidenone                                                                    | gamma-CEHC glucuronide                                                                       |
| 2,5-Diamino-6-(5-phospho-D-ribitylamino)pyrimidin-4(3H)-one | SM(d16:2(4E,8Z)/23:0)                                                                   | Estreptoquinasa                                                                              |
| L-Leucine                                                   | SM(d18:1/PGF2alpha)                                                                     | Ecklonialactone A                                                                            |
| Vanillic acid 4-O-sulfate                                   | PA(PGJ2/24:0)                                                                           | Docosatrienoic Acid                                                                          |
| Guanosine                                                   | geneticin                                                                               | 1-Methyl-4-phenyl-1,2,3,6-tetrahydropyridine                                                 |
| Inosine                                                     | 5-Isopropyl-2-(2-methylpropyl)-2-cyclohexen-1-one                                       | 1-H-Inden-1-one,2,3-dihydro-3,3,5,6-tetramethyl                                              |
| 5-(2'-Formylethyl)-4,6-dihydroxypicolinate                  | Tetradecanedioic acid                                                                   | Isoleucylhydroxyproline                                                                      |
| Imidazole-4-acetate                                         | Adynerin                                                                                | 3,4-Dihydroxy-2-methoxy-4-methyl-3-[2-methyl-3-(3-methyl-but-2-enyl)-oxiranyl]-cyclohexanone |
| Pantothenol                                                 | PA(24:0/20:3(8Z,11Z,14Z)-2OH(5,6))                                                      | 2-Ethylidene-1,5-dimethyl-3,3-diphenylpyrrolidine                                            |
| 6-Hydroxy-3,4-dihydro-2(1H)-quinolinone                     | Goshuyic acid                                                                           | VIQUALINE                                                                                    |
| 16-phenoxy tetranor Prostaglandin A2                        | Antroquinonol                                                                           | 2alpha-Fluoro-17beta-hydroxyandrost-4-en-3-one                                               |
| PA(8:0/PGE2)                                                | Capsaicin                                                                               | 15(R)-PGF2 伪                                                                                 |
| Fallypride                                                  | 2,4-Decadienamide,5-(4-methoxyphenyl)-N-[(1R)-1-methyl-4-(3-pyridinyl)butyl]-, (2E,4E)- | Illicifolinoside A                                                                           |
| Isopentyl gentiobioside                                     | DG(10:0/TXB2/0:0)                                                                       | Arg Pro Lys                                                                                  |
| Hydromorphone-3-glucoside                                   | (6E,8R,10Z)-8-hydroxy-3-oxohexadecadienoic acid                                         | Glycocholic Acid                                                                             |
| PE(18:3(6Z,9Z,12Z)/PGJ2)                                    | 2-Hydroxymyristic acid                                                                  | PI(20:1(11Z)/20:3(8Z,11Z,14Z)-2OH(5,6))                                                      |
| N(2)-phenylacetyl-L-glutamate                               | Nebramine                                                                               | (-)-5-(2-Propenyl)-2-oxazolidinethione                                                       |
| Neoisomidecamycin                                           | 5-Hydroxytrideca-8,11-dienoylcarnitine                                                  | Deoxycholylicitrulline                                                                       |
| PGP(a-21:0/PGJ2)                                            | Dextilidine                                                                             | Pro Lys Leu Ser                                                                              |
| N-Acetyl-DL-methionine                                      | 1-Dodecylimidazole                                                                      | PI(20:4(5Z,8Z,11Z,14Z)/20:0)                                                                 |
| CDP-DG(i-22:0/a-21:0)                                       | Cadin-9-en-1-ol                                                                         | PS(20:4(6Z,8E,10E,14Z)-2OH(5S,12R)/22:0)                                                     |
| Pro-Pro-Phe                                                 | Tetranorprostanedioic acid                                                              | (真)16-HDoHE                                                                                  |
| Topiramate                                                  | trans-Jasmone                                                                           | Lysyltryptophan                                                                              |
| 4,1-Benzoxazepine                                           | 9-Decenoylcholine                                                                       | Nebracetam                                                                                   |
| 2,4-Quinolinediol                                           | N-palmitoyl-phosphoethanolamine                                                         | 5,8-Dimethoxychalepensis                                                                     |
| Glucuronolactone                                            | L-Proline, 1-(1-L-leucyl-L-prolyl)-                                                     | 5(S),11(R)-DiHETE                                                                            |
| Chymostatin                                                 | Prostaglandin A2                                                                        | Primaquine                                                                                   |
| beta-Neendorphin                                            | Dimethylsphingosine                                                                     | Ciclesonide                                                                                  |

|                                               |                                                                      |                                                                                                 |
|-----------------------------------------------|----------------------------------------------------------------------|-------------------------------------------------------------------------------------------------|
| 3-Aminocaproic acid                           | Diplodiatoxin                                                        | Arginyllysine                                                                                   |
| Articainic acid                               | Phorbol myristate                                                    | Sarcodon scabrosus Depsipeptide                                                                 |
| 3-Butyn-2-amine, 2-methyl-                    | Epoxysiderol                                                         | (+)-Lysergic acid                                                                               |
| N-Carboxyacetyl-D-phenylalanine               | Saponin H                                                            | 16-phenoxy tetranor PGF2 伪 cyclopropyl methyl amide                                             |
| N-Formylmethionine                            | PS(24:0/20:4(5Z,8Z,11Z,14Z)-OH(20))                                  | 7-oxo-11E,13-Tetradecadienoic acid                                                              |
| INDOLE-3-CARBINOL                             | PG(i-20:0/20:4(5Z,8Z,11Z,14Z)-OH(20))                                | B-Octylglucoside                                                                                |
| Indole                                        | 11'-Carboxy-alpha-tocotrienol                                        | Phenazocine                                                                                     |
| 3'-Deoxyderhamnosylmaysin                     | Cer(d18:2(4E,14Z)/6 keto-PGF1alpha)                                  | 2-[Octahydro-4,7-dimethyl-1-oxocyclopenta[c]pyran-3-yl]nepetalactam                             |
| Cysteinyl-Proline                             | 1-Stearoyl-2-Docosahexaenoyl-sn-Glycero-3-[Phospho-rac-(1-glycerol)] | Stachyflin                                                                                      |
| Tropine                                       | PS(24:0/18:1(12Z)-O(9S,10R))                                         | methoxycatecholamine                                                                            |
| N(tele)-methylhistaminium                     | (Z)-7-Hexadecen-1,16-olide                                           | 2-(1,3-Benzodioxol-5-yl)-3,5,6,8-tetramethoxy-7-[(3-methyl-2-butenyl)oxy]-4H-1-benzopyran-4-one |
| 11-Hydroxyprogesterone 11-glucuronide         | 9-Hydroxy-12-oxo-10(E),15(Z)-octadecadienoic acid                    | 3-Hydroxypregn-4-en-20-one                                                                      |
| Tryptophyl-Gamma-glutamate                    | Methoprene acid                                                      | Glycohyocholate                                                                                 |
| Norfuraneol                                   | Hexadecanedioic acid                                                 | Cytochalasin B                                                                                  |
| Tragopogonsaponin D                           | 12(S)-HpEPE                                                          | Cyclohexenyl                                                                                    |
| 2-Hydroxyglutaric acid lactone                | 13(S)-HODE                                                           | Tetralin                                                                                        |
| 2,6,6-Trimethyl-2-cyclohexene-1,4-dione       | 19-Norandrosterone                                                   | 1-Methyl-2-propylbenzene                                                                        |
| Oxiracetam                                    | LysoPE(0:0/18:2(9Z,12Z))                                             | Edrophonium                                                                                     |
| Aminochrome o-semiquinone                     | 1,25-Dihydroxy-19-norvitamin D3                                      | L-2-Amino-3-methylenehexanoic acid                                                              |
| Nalidixic acid                                | PC(24:1(15Z)/22:6(5Z,7Z,10Z,13Z,16Z,19Z)-OH(4))                      | 7,8-Diaminononanoate                                                                            |
| 4-Methoxybenzenepropanol 1-(2-sulfoglucoside) | PE-NMe(20:3(5Z,8Z,11Z)/20:1(11Z))                                    | 4-Acetoxy-2-hexyltetrahydrofuran                                                                |
| Suberic acid                                  | (反)13-HpODE                                                          | 2,3-Dihydroxypropyl octanoate                                                                   |
| CDP-DG(a-13:0/20:3(5Z,8Z,11Z)-O(14R,15S))     | Linoleamide                                                          | 1-Deoxypentalenate                                                                              |
| AB-Fubinaca                                   | Dicyclomine                                                          | Histidyllysine                                                                                  |
| Pipemicidic acid                              | PE(18:2(9Z,12Z)/20:5(5Z,8Z,11Z,14Z,17Z))                             | Lotusine                                                                                        |
| Baicalin                                      | 9(R)-HETE                                                            | Prostaglandin D1                                                                                |
| Swainsonine                                   | Palatinose                                                           | Deoxycholic acid glycine conjugate                                                              |
| Fibrin                                        | 20-Dihydrodyrogesterone                                              | PC(20:0/PGD1)                                                                                   |
| Aminophenetole                                | 2,22-Dideoxy-3-dehydroecdysone                                       | Sodium glycochenodeoxycholate                                                                   |
| Glutaminy-Gamma-glutamate                     | (13R,14R)-8-Labdene-13,14,15-triol                                   | PS(PGF1alpha/22:2(13Z,16Z))                                                                     |
| Decarbamoylneosaxitoxin                       | MG(24:6(6Z,9Z,12Z,15Z,18Z,21Z)/0:0/0:0)                              | Leridol                                                                                         |
| Nabumetone                                    | 11-deoxy-PGE1                                                        | Glycyl-l-histidyl-l-lysine                                                                      |
| Paeonimetabolin I                             | LysoPE(0:0/18:1(11Z))                                                | Absinthin                                                                                       |
| 2-Hydroxy-lauroylcarnitine                    | PE(18:1(11Z)/20:0)                                                   | Aab(1) avermectin                                                                               |
| 2-Methyl-4-(pyridin-3-ylethynyl)thiazole      | 9,10-Epoxyoctadecanoic acid                                          | Streptomycin                                                                                    |
| 5-Methylthiopentanaldoxime                    | PE-NMe2(18:1(11Z)/20:1(11Z))                                         | Momordicoside B                                                                                 |
| Jasmonic acid                                 | Palmitoylglycine                                                     | Anomurine                                                                                       |
| Goshonoside F6                                | trans-16-Octadecenoic acid                                           | Lysergic acid                                                                                   |
| Nartograstim                                  | 20-Hydroxy-6Z,15Z-eicosadienoic acid                                 | Anhydrocinnzeylanol                                                                             |
| AzIV                                          | Dehydrophytosphingosine                                              | PC(20:5(5Z,8Z,11Z,14Z,17Z)/PGF1alpha)                                                           |
| Peperinic acid                                | Boviquinone 4                                                        | 12-oxo-5E,8E,10Z-dodecatrienoic acid                                                            |

|                                                                                                |                                                                                          |                                                                                               |
|------------------------------------------------------------------------------------------------|------------------------------------------------------------------------------------------|-----------------------------------------------------------------------------------------------|
| 5-Amino-5-(4-hydroxybenzyl)-6-(D-ribitylimino)-5,6-dihydrouracil                               | Androsterone glucuronide                                                                 | Didesmethylimipramine                                                                         |
| Brefeldin A                                                                                    | MEDICA 16                                                                                | (E)-2-methyl-4-((3aS)-1-methyl-2,3,8,8a-tetrahydropyrrolo[2,3-b]indol-3a(1H)-yl)but-2-en-1-ol |
| 2"-N-Acetyl-6"-deamino-6"-hydroxyneomycin C                                                    | isopimaric acid                                                                          | Ipomeamaronol                                                                                 |
| Dibutyl malate                                                                                 | 3b,15b,17a-Trihydroxy-pregnenone                                                         | Lilopristone                                                                                  |
| Ancymidol                                                                                      | PE(18:0/18:1(12Z)-O(9S,10R))                                                             | 5alpha-Pregnan-20alpha-ol-3-one                                                               |
| 2-Hydroxy-2,4-pentadienoate                                                                    | 4-Oxoretinol                                                                             | PI(22:5(7Z,10Z,13Z,16Z,19Z)/PGD1)                                                             |
| Toluene-cis-dihydrodiol                                                                        | Hexadecanoic acid                                                                        | Lysyl-aspartyl-glutamyl-leucine                                                               |
| 7-Hydroxy-3-(3-hydroxy-4-methoxybenzyl)-5-methoxy-4-chromanone                                 | Glycylhydroxyproline                                                                     | Hexadecyl Acetyl Glycerol                                                                     |
| Neocasomorphin (1-5)                                                                           | (4E,7E,10Z,13E,16E,19E)-docosa-4,7,10,13,16,19-hexaenoic acid                            | Red chlorophyll catabolite                                                                    |
| 5-O-Ethyl 3-O-methyl (4S)-2,6-dimethyl-4-(3-nitrophenyl)-3,4-dihydropyridine-3,5-dicarboxylate | 8,11-eicosadiynoic acid                                                                  | 1-(2-Furanyl)-1-pentanone                                                                     |
| PA(8:0/5-iso PGF2VI)                                                                           | Pregnanetriolone                                                                         | Geranyl-hydroxybenzoate                                                                       |
| alpha-Hydroxymetoprolol                                                                        | L-Metanephrine                                                                           | 8-iso PGF3 伪                                                                                  |
| Baicalein                                                                                      | Vinaginsenoside R16                                                                      | 9alpha-Fluoro-11beta-hydroxy-6alpha-methylpregn-4-ene-3,20-dione                              |
| N-Acetyl-9-aminomincycline, (4R)-                                                              | 1,5-Dibutyl methyl hydroxycitrate                                                        | Leu Val Arg Tyr                                                                               |
| 11,13-Dihydrotaraxinic acid glucosyl ester                                                     | Biocytin                                                                                 | Oleandolide                                                                                   |
| PS(18:4(6Z,9Z,12Z,15Z)/20:5(7Z,9Z,11E,13E,17Z)-3OH(5,6,15))                                    | Arginyltryptophan                                                                        | Lunamarine                                                                                    |
| Osmundalactone                                                                                 | N-Jasmonoyltyrosine                                                                      | PG(PGE2/22:6(4Z,7Z,10Z,13Z,16Z,19Z))                                                          |
| Urate-3-ribonucleoside                                                                         | Dicaffeoylputrescine                                                                     | 14-Deoxyandrographolide                                                                       |
| Asteltoxin                                                                                     | P-Hydroxyhippuryl-his-leu-OH                                                             | Thromboxane B2                                                                                |
| Oxonol                                                                                         | Riboflavin                                                                               | Nandrolone phenpropionate                                                                     |
| Pelubiprofen                                                                                   | Succinate                                                                                | Ixocarpanolide                                                                                |
| 8-Azaxanthine                                                                                  | Sclareol                                                                                 | PS(15:0/PGE2)                                                                                 |
| b-D-Xylopyranosyl-(1->4)-a-L-rhamnopyranosyl-(1->2)-L-arabinose                                | 5-N-Acetyl-7-N-(D-alanyl)-legionaminic acid                                              | Octadecanoic acid                                                                             |
| Blumealactone C                                                                                | (S)-3-{4-[2-(5-Methyl-2-phenyl-oxazol-4-yl)-ethoxy]-phenyl}-2-propylamino-propionic acid | 6E,8E,12E,14E-Hexadecatetraen-10-ynoic acid                                                   |
| N-Acetyl desmethyl frovatriptan                                                                | Dihydrofolate                                                                            | 2,4-Dimethylpyridine                                                                          |
| N-Docosahexaenoyl Histidine                                                                    | 6'-Apiosyllotaustralin                                                                   | L-Pipecolate                                                                                  |
| Pyranomamma C                                                                                  | Risperidone                                                                              | (R)-1-Methylpiperidine-2-carboxylic acid                                                      |
| 7-(1,3-Cyclohexadienyl)-5-hydroxy-2,6-dimethyl-2-hepten-4-one                                  | Dehydroepiandrosterone sulfate                                                           | 1,2-Dihydro-1,1,6-trimethylnaphthalene                                                        |
| Pinacidil pyridine N-oxide                                                                     | 17-O-acetylnorajmaline                                                                   | (-)-Jasmonic acid                                                                             |
| 4-Trimethylammoniobutanoate                                                                    | 2,3-Dehydrosalvipisone                                                                   | Dehydrocostus lactone                                                                         |
| milbemycin alpha9                                                                              | Acorafloxacin                                                                            | TMB (hydrochloride hydrate)                                                                   |
| Steviobioside                                                                                  | Kurarinone                                                                               | Valerenolic acid                                                                              |
| Lansiumarin C                                                                                  | Glucose-6-glutamate                                                                      | 1-Piperidinepropanol, alpha-cyclohexyl-4-(3-hydroxyphenyl)-3,4-dimethyl-                      |

|                                                                                                                        |                                                                                                                                        |                                                                                                        |
|------------------------------------------------------------------------------------------------------------------------|----------------------------------------------------------------------------------------------------------------------------------------|--------------------------------------------------------------------------------------------------------|
| Colforsin daropate                                                                                                     | Desacetylvindoline                                                                                                                     | 3alpha,7alpha,12beta-Trihydroxy-5beta-cholanoic acid                                                   |
| 5-Hydroxydodeca-7,9-dienoylcarnitine                                                                                   | S-adenosyl-L-methioninamine                                                                                                            | PGP(18:3(6Z,9Z,12Z)/PGF1alpha)                                                                         |
| Dodecadienoic acid                                                                                                     | O-Demethylencaïnide                                                                                                                    | alpha-Linolenic acid                                                                                   |
| Ovalicin                                                                                                               | Posiphen                                                                                                                               | Formylisoglutamine                                                                                     |
| Strictosidine aglycone                                                                                                 | Moxifloxacin                                                                                                                           | L-Nicotianine                                                                                          |
| 2,6 Dimethylheptanoyl carnitine                                                                                        | Cer(d17:1/PGF2alpha)                                                                                                                   | Methyl 4-tert-butylphenylacetate                                                                       |
| 9-Oxononanoic acid                                                                                                     | UDP-L-rhamnose                                                                                                                         | Phytosphingosine                                                                                       |
| Menthyl pyrrolidone carboxylate                                                                                        | Hypromellose                                                                                                                           | 9-F1-phytoprostane                                                                                     |
| 15-Deacetylneosalaniol                                                                                                 | 1H-Indole-3-carboxylic acid, 1-methyl-, (1-(2-((methylsulfonyl)amino)ethyl)-4-piperidinyl)methyl ester                                 | 10-OPDA                                                                                                |
| Dihydroroseoside                                                                                                       | latrunculin B                                                                                                                          | PGP(20:3(5Z,8Z,11Z)/PGF1alpha)                                                                         |
| Sebacic acid                                                                                                           | Tetrahydrofolate                                                                                                                       | 6'-Sialyllactosamine                                                                                   |
| 2'-Deamino-2'-hydroxyparamamine                                                                                        | Parsalmide                                                                                                                             | 7-hydroxyoct-6-enoylglycine                                                                            |
| N-Myristoyl Glutamic acid                                                                                              | Arbutin                                                                                                                                | Oblongolide                                                                                            |
| Glutathionylspermine                                                                                                   | His Phe Val His                                                                                                                        | Lithocholic acid glycine conjugate                                                                     |
| Menthone 1,2-glyceryl ketal                                                                                            | Thr Thr Phe Tyr                                                                                                                        | 3-methylheptanedioylcarnitine                                                                          |
| PI(20:4(5Z,8Z,11Z,14Z)/PGE2)                                                                                           | N-(Tricosanoyl)-4E,14Z-sphingadienine                                                                                                  | 1,2,3,4,5,6-Hexahydro-5-(1-hydroxyethylidene)-7H-cyclopenta[b]pyridin-7-one                            |
| 5-Hydroxybuspirone                                                                                                     | 1,2-Didecanoyl-sn-glycerol                                                                                                             | His Tyr Phe                                                                                            |
| Etimicin                                                                                                               | 2-Ethylsulfanyl-1H-benzimidazole                                                                                                       | Glyceryl 5-hydroxydecanoate                                                                            |
| Dodecenoylcarnitine                                                                                                    | Mdbbp                                                                                                                                  | (1S,2S,4R,5S,7S)-2,5,7-Fenchanetriol 2-O-b-D-glucoside                                                 |
| Undec-5-enedioylcarnitine                                                                                              | PC(24:1(15Z)/PGF2alpha)                                                                                                                | N6-Ethanimidoyl-D-lysine                                                                               |
| (6beta,7alpha,12beta,13beta)-7-Hydroxy-11,16-dioxo-8,14-apianadien-22,6-olide                                          | 3-hydroxybenzoic acid-3-O-sulphate                                                                                                     | Styrene                                                                                                |
| PI(22:4(10Z,13Z,16Z,19Z)/PGF2alpha)                                                                                    | Feruloylputrescine                                                                                                                     | 3,7-Dihydroxytetradecanoylcarnitine                                                                    |
| (2s)-2-[[[(2s)-2-Acetamido-5-[[n-(Methylcarbamoyl)carbamimidoyl]amino]pentanoyl]-Methyl-Amino]-3-Phenyl-Propanoic Acid | Guanidine, N-((2S,3S,4R)-6-amino-2-(dimethoxymethyl)-3,4-dihydro-3-hydroxy-2-methyl-2H-1-benzopyran-4-yl)-N'-cyano-N''-(phenylmethyl)- | 3-[[[3-Methoxy-5-(1H-pyrrol-2-yl)pyrrol-2-ylidene]methyl]-1,4-dimethyl-4,5,6,7-tetrahydro-2H-isoindole |
| 2-Hydroxydodeca-4,6-dienoylcarnitine                                                                                   | Gamma glutamyl ornithine                                                                                                               | Arginylhydroxyproline                                                                                  |
| N-Formyl-4-amino-5-aminomethyl-2-methylpyrimidine                                                                      | Taribavirin                                                                                                                            | Prodigiosin                                                                                            |
| Donepezil                                                                                                              | PE(TXB2/14:1(9Z))                                                                                                                      | (-)-trans-Carveol glucoside                                                                            |
| Pectachol                                                                                                              | 5-Ribosylparamamine                                                                                                                    | 11,14,15-THETA                                                                                         |
| Cerivastatin                                                                                                           | p-CHLOROPHENYLALANINE                                                                                                                  | N-Eicosapentaenoyl Phenylalanine                                                                       |
| alpha-Turmerone                                                                                                        | Aminoethylcysteine ketimine                                                                                                            | Erythromycin C                                                                                         |
| Humulenol I                                                                                                            | Cardiogenol C                                                                                                                          | PE(20:4(8Z,11Z,14Z,17Z)/22:2(13Z,16Z))                                                                 |
| 5,7-Megastigmadien-9-ol glucoside                                                                                      | alpha-((2,3-Dimethyl-1-aziridinyl)methyl)-2-nitro-1H-imidazole-1-ethanol                                                               | Gly Trp Ile                                                                                            |
| N-[2-(3,5-Dioxopiperazino)propyl]-N-(2-amino-2-oxoethyl)glycine                                                        | 3-(4-Iodophenyl)-2-mercapto-(Z)-2-propenoic acid                                                                                       | Toluene                                                                                                |
| Cholyasparagine                                                                                                        | GDC-0834 Racemate                                                                                                                      | N(6)-Methyllysine                                                                                      |
| Ethyl 7-epi-12-hydroxyjasmonate glucoside                                                                              | Lividamine                                                                                                                             | N6-Acetyl-N6-hydroxy-L-lysine                                                                          |
| Sorbitan palmitate                                                                                                     | 2-(3-Carboxy-3-(methylammonio)propyl)-L-histidine                                                                                      | cis-6-Nitro-p-mentha-1(7),2-diene                                                                      |
| Lavoltidine                                                                                                            | Allosamidin                                                                                                                            | 3,4-Dihydrocadalene                                                                                    |
| Genistein                                                                                                              | Mozenavir                                                                                                                              | (Z)-alpha-Bergamotenoic acid                                                                           |

|                                                                                              |                                                                 |                                                                                                                             |
|----------------------------------------------------------------------------------------------|-----------------------------------------------------------------|-----------------------------------------------------------------------------------------------------------------------------|
| Cerulenin                                                                                    | Flobetair                                                       | 3,4-Dimethyl-5-pentyl-2-furanpropanoic acid                                                                                 |
| Verapamil                                                                                    | [(2R)-Oxiran-2-yl]methyl 2-methylprop-2-enoate                  | Phencyclidine                                                                                                               |
| Ganoderenic acid A                                                                           | Ttatpn                                                          | 12-Oxo-2,3-dinor-10,15-phytodienoic acid                                                                                    |
| Isobutylxanthine                                                                             | 5,9,11-trihydroxyprosta-6E,14Z-dien-1-oate                      | 12-OPDA                                                                                                                     |
|                                                                                              | Thr His Phe His                                                 | 9,10,13-Trihydroxystearic acid                                                                                              |
| Small bacteriocin                                                                            | PIP(20:3(5Z,8Z,11Z)/PGE2)                                       | 17(18)-EpETE                                                                                                                |
| PI(22:2(13Z,16Z)/6 keto-PGF1alpha)                                                           | PS(20:5(5Z,8Z,11Z,14Z,17Z)/20:5(7Z,9Z,11E,13E,17Z)-3OH(5,6,15)) | HT-2 Toxin                                                                                                                  |
| 6-Hydroxynon-7-enoylcarnitine                                                                | Tropolone                                                       | Chenodeoxycholic Acid                                                                                                       |
| Bargustanine                                                                                 | (+)-Carbovir                                                    | Lansioside C                                                                                                                |
| MG(0:0/14:1(9Z)/0:0)                                                                         | Thr Trp Tyr Gln                                                 | PC(16:0/PGD2)                                                                                                               |
| Rimiterol                                                                                    | Rebaudioside B                                                  | methyl 2-Pyrimidine Carboxylate                                                                                             |
| PC(P-18:1(11Z)/LTE4)                                                                         | cis-1,2-Dihydrobenzene-1,2-diol                                 | Oleoyl glycine                                                                                                              |
| Cucurbitic acid                                                                              | Dakh peptide                                                    | 14(15)-EET-d11                                                                                                              |
| CAY10598                                                                                     | herbimycin a                                                    | Premazepam                                                                                                                  |
| N-[(3a,5b,7b)-7-hydroxy-24-oxo-3-(sulfooxy)cholan-24-yl]-Glycine                             | Isopentenyladenine-9-N-glucoside                                | 2-Hydroxypropyl 2-isopropyl-5-methylcyclohexyl carbonate                                                                    |
| PA(20:1(11Z)/PGF1alpha)                                                                      | Neuromedin B (4-10)                                             | 17alpha-Trenbolone                                                                                                          |
| 13(S)-HpOTrE                                                                                 | Satratoxin G                                                    | Baikiain                                                                                                                    |
| 4-(Dodecylamino)Phenol                                                                       | Andersoline                                                     | Aethusin                                                                                                                    |
| CAY10580                                                                                     | Myrigalone H                                                    | Borrerine                                                                                                                   |
| Furanofukinin                                                                                | gamma-L-Glutamyl-butirosin B                                    | Polyethylene, oxidized                                                                                                      |
| Prodolic acid                                                                                | Bms-275183                                                      | PGF2 伪 1,11-lactone                                                                                                         |
| (5Z,8Z,11Z,14Z)-N-(4-Hydroxy-2-methylphenyl)-5,8,11,14-icosatetraenamide                     | Thr Phe Phe Phe                                                 | 16b-Hydroxystanozolol                                                                                                       |
| 13,14-dihydro-15-keto-tetranor PGF1 尾                                                        | PGP(i-13:0/18:3(10,12,15)-OH(9))                                | 1-(4-Hydroxyphenyl)-4,8-dimethyl-10-(2,6,6-trimethylcyclohexen-1-yl)deca-3,5,7,9-tetraen-2-one                              |
| Lycoperoside D                                                                               | Primary fluorescent chlorophyll catabolite                      | 1,5,5,8-Tetramethyl-12-thiabicyclo[9.1.0]dodeca-3,7-diene                                                                   |
| PC(DiMe(13,5)/22:6(5Z,8E,10Z,13Z,15E,19Z)-2OH(7S,17S))                                       | 2-OH-benzyl                                                     | Gibberellin A4                                                                                                              |
| N-Palmitoyl tyrosine                                                                         | 2-Methoxy-estradiol-17beta 3-glucuronide                        | Sagittoside B                                                                                                               |
| (5E)-7-{4,6-Dihydroxy-2-[(1E,5E)-3-hydroxyocta-1,5-dien-1-yl]oxan-3-yl}hept-5-enoylcarnitine | 2-Hydroxypropyl starch                                          | 4,4'-Methylene bis(2-methylaniline)                                                                                         |
| 3-Oxotridecanoylcarnitine                                                                    | Lochnerinine                                                    | Gentamicin C2                                                                                                               |
| N-Linoleoyl Valine                                                                           | Desglugastrin                                                   | 3H-Pyrido(1,2-c)pyrimidin-3-one, 4-(2-(bis(1-methylethyl)amino)ethyl)-4,4a,5,6,7,8-hexahydro-1-methyl-4-phenyl-, trans-(+)- |
| SM(d19:1/PGF2alpha)                                                                          | Ibudilast                                                       | Isopropyl beta-D-glucoside                                                                                                  |
| PC(PGF1alpha/22:3(10Z,13Z,16Z))                                                              | Propanoic acid, 2-hydroxy-3-[(4-hydroxy-1-naphthalenyl)oxy]-    | 7-Mercaptoheptanoylthreonine                                                                                                |
| Undecaprenyl phosphate alpha-L-Ara4N                                                         | 9-beta-d-Arabinofuranosylguanidine                              | 5S,6S-epoxy-15R-hydroxy-ETE                                                                                                 |
| Carrageenan, potassium salt of                                                               | Coumarin                                                        | Butyl butyryllactate                                                                                                        |
| Ciraparantag                                                                                 | 5-(3-Pyridyl)-2-hydroxytetrahydrofuran                          | 5,8,11-Heptadecatriynoic acid                                                                                               |
| PG(18:1(12Z)-2OH(9,10)/i-24:0)                                                               | N-Acetylneuraminate 9-phosphate                                 | Prostaglandin B1                                                                                                            |

|                                                                                       |                                                                    |                                                                       |
|---------------------------------------------------------------------------------------|--------------------------------------------------------------------|-----------------------------------------------------------------------|
| Demethoxyrapamycin                                                                    | (+)-Galeon                                                         | 5-Phosphooxy-L-lysine                                                 |
| Deoxychylserine                                                                       | Neomycin                                                           | 7,10-Hexadecadiynoic acid                                             |
| Formylfusarochromanone                                                                | Dihydrotestosterone diglucuronide                                  | Di(2-ethylhexyl) adipate                                              |
| Dodecanedioylcarnitine                                                                | Atorvastatin                                                       | 3-oxocholest-4-en-26-oate                                             |
| Antibiotic CP 412065                                                                  | 5-(3'-Carboxy-3'-oxopropenyl)-4,6-dihydroxypicolinate              | L-Thyronine                                                           |
| (2E,4E)-Dodeca-2,4-dienoylcarnitine                                                   | 3-(4-Hydroxyphenyl)-3,5,6,8-tetrahydro-2H-chromene-4,7-dione       | Sphingosine-1-phosphate                                               |
| Nelipepimut-S heptanoate                                                              | Coeligin                                                           | LysoPC(20:5(5Z,8Z,11Z,14Z,17Z)/0:0)                                   |
| 1-[(2R)-2-(1,3-Benzodioxol-4-yl)heptyl]-3-[2,6-di(propan-2-yl)phenyl]urea             | Perilloside B                                                      | LysoPG(18:2(9Z,12Z)/0:0)                                              |
| 7,8-Dihydromethanopterin                                                              | Glutamyl-Serine                                                    | PS(PGF1alpha/18:2(9Z,12Z))                                            |
| 4alpha-carboxy-5alpha-cholesta-8,24-dien-3beta-ol                                     | (2R,4S)-1-Tert-Butyl 2-methyl 4-aminopyrrolidine-1,2-dicarboxylate | Aminopropanol                                                         |
| Dibenzepin                                                                            | 1-(2-Hydroxyethyl-2-hydroxymethyl)-5-nitro-imidazole               | 1,2,3,4,tetrahydro-1,5,7-trimethylnaphthalene                         |
| (3a,5b,7a)-23-Carboxy-7-hydroxy-24-norcholan-3-yl-b-D-Glucopyranosiduronic acid       | 5-Formiminotetrahydrofolic acid                                    | 3-(4-Isopropylphenyl)propanal                                         |
| Periandrin V                                                                          | 8-Hydroxyacyclovir                                                 | 7-Ethyl-3,6-dihydro-1,4-dimethylazulene                               |
| 11beta,17alpha,21-Trihydroxy-5beta-pregnane-3,20-dione                                | PIP(PGJ2/18:2(9Z,12Z))                                             | [3-(2-Aminopropyl)-6-methylidene-cyclohexa-1,3-dien-1-yl]methanediol  |
| Curcumadiol                                                                           | Combrestatin A4                                                    | alpha-Campholene acetate                                              |
| N-[Diaminophosphoryloxy-[di(propan-2-yl)amino]phosphoryl]-N-propan-2-ylpropan-2-amine | PS(18:0/PGF2alpha)                                                 | alpha-Irone                                                           |
| Janthitrem E                                                                          | (1R,6R)-6-hydroxy-2-succinylcyclohexa-2,4-diene-1-carboxylate      | 1-Acetyl-2-methylcyclopentene                                         |
| 8-[(2R,3S)-3-(8-Hydroxyoctyl)oxiran-2-yl]octanoylcarnitine                            | Litcubine                                                          | Germacrene                                                            |
| (7Z,9E)-Dodeca-7,9-dienoylcarnitine                                                   | Melatonin                                                          | (6Z,9Z,12Z)-Octadecatrienoic acid                                     |
| Octadeca-2,4-dienedioic acid                                                          | S-(Hydroxymethyl)glutathione                                       | pyrrolostatin                                                         |
| PG(16:0/5-iso PGF2VI)                                                                 | PG(18:1(11Z)/LTE4)                                                 | Ipomeatetrahydrofuran                                                 |
| 10-Deoxymethymycin                                                                    | 3-Methyl-2-oxindole                                                | ( $\alpha$ )12,13-DiHOME                                              |
| Cyclosquamosin A                                                                      | Cornoside                                                          | Docosahexaenoic Acid ethyl ester                                      |
| gamma-Chaconine                                                                       | PI(5-iso PGF2VI/22:6(4Z,7Z,10Z,13Z,16Z,19Z))                       | SM(d18:0/20:4(6E,8Z,11Z,13E)-2OH(5S,15S))                             |
| p-Coumaroylagmatine                                                                   | 3'-Deoxythymidine                                                  | isoamyl                                                               |
| Germacrenone                                                                          | Mytilin A                                                          | 3-Methyl-2-(3-pyridyl)-1-indoleoctanoic acid                          |
| Temsirolimus                                                                          | PGP(20:1(11Z)/PGE2)                                                | 3-Hydroxyhexadecanoylcarnitine                                        |
| PI(20:0/6 keto-PGF1alpha)                                                             | Furfural diethyl acetal                                            | [3h]Thienylcyclohexylpiperidine                                       |
| 2,3-Dinor-8-iso prostaglandin F2alpha                                                 | 2,2-Bis(4-hydroxyphenyl)-propanoic acid                            | Tetraazacyclododecanetetraacetic acid                                 |
| beta-Citraurol                                                                        | FUSARENON X                                                        | Norethindrone                                                         |
| PI(PGF1alpha/20:3(5Z,8Z,11Z))                                                         | 5,7-Dimethoxy-6-C-methylflavanone                                  | Leucyl-Tryptophan                                                     |
| N-Myristoyl Proline                                                                   | Daidzein                                                           | Tryptophyl-Cysteine                                                   |
| PI(20:1(11Z)/6 keto-PGF1alpha)                                                        | (R)-pantoate                                                       | N,N-dimethyl-Safingol                                                 |
| PA(13:0/PGD1)                                                                         | BYSSOCHLAMIC ACID                                                  | 4alpha-carboxy-ergosta-7,24(241)-dien-3beta-ol                        |
| PA(22:2(13Z,16Z)/20:0)                                                                | Dacarbazine                                                        | Octanoic acid                                                         |
| PE(14:0/PGJ2)                                                                         | Milbemycin A3                                                      | 1-(3-Hydroxy-2,2,6-trimethyl-3,4-dihydrochromen-4-yl)pyrrolidin-2-one |
|                                                                                       | Niveusin C                                                         | Didemnin C                                                            |



|                                                                                                            |                                                                                                                   |                                                                     |
|------------------------------------------------------------------------------------------------------------|-------------------------------------------------------------------------------------------------------------------|---------------------------------------------------------------------|
| Noberastine                                                                                                | 4-Amino-1-[(2R,5R)-5-(aminomethyl)-3,4-dihydroxyoxolan-2-yl]pyrimidin-2-one                                       | 6-Keto-prostaglandin E1                                             |
| Avermectin B1b monosaccharide                                                                              | (2S)-2-(Butanoylamino)-5-[[[(1R)-2-(carboxymethylamino)-2-oxo-1-(sulfanylmethyl)ethyl]amino]-5-oxo-pentanoic acid | 1,2-Dimethyl-4-(6-methyl-4-heptenyl)-1,3-cyclohexadiene             |
| PA(10:0/20:4(5Z,8Z,11Z,14Z)-OH(20))                                                                        | L-4-Hydroxyglutamate semialdehyde                                                                                 | 1-hydroxy-2-methyl-2-(E)-butenyl 4-diphosphate                      |
| 6-Gingerol                                                                                                 | Littorine                                                                                                         | 2-Hydroxylinolenic acid                                             |
| Hydroxyisobobilin                                                                                          | 3,3'-Dihydroxy-4',5,7-trimethoxyflavan                                                                            | Fluridone                                                           |
| Sirolimus                                                                                                  | N-Nitroso(2-hydroxypropyl)(2-oxopropyl)amine                                                                      | PS(22:2(13Z,16Z)/18:2(10E,12Z))+O(9))                               |
| Soyasaponin gamma-A                                                                                        | L-Threonine                                                                                                       | Phenylethylamine                                                    |
| Dodeca-2,4,6-trienoylcarnitine                                                                             | Hydantoin-5-propionic acid                                                                                        | (S)-(-)-Perillyl alcohol                                            |
| PA(PGE2/18:2(9Z,12Z))                                                                                      | Arg His Ala Met                                                                                                   | Palmitoyl-L-carnitine                                               |
| PS(22:5(4Z,7Z,10Z,13Z,16Z)/PGJ2)                                                                           | Dehydroepiandrosterone                                                                                            | N-Lauroyl Glutamic acid                                             |
| PG(a-25:0/20:4(6E,8Z,11Z,14Z))+O(5))                                                                       | Sphingosine 1-phosphate                                                                                           | Glycine                                                             |
| PI(22:3(10Z,13Z,16Z)/PGE2)                                                                                 | 4-Hydroxy-3-prenylbenzoic acid glucoside                                                                          | Tsuzuic acid                                                        |
| PI(22:2(13Z,16Z)/PGF2alpha)                                                                                | Benzoylmesaconine                                                                                                 | N1-(5-Phospho-a-D-ribosyl)-5,6-dimethylbenzimidazole                |
| Gentamicin C1                                                                                              | Kamahine C                                                                                                        | 24-Hydroxytetracosanoic acid                                        |
| Pravastatin                                                                                                | Lys His Val Asp                                                                                                   | Ser Ser Asp                                                         |
| Amyloid beta-peptide(25-35)                                                                                | Pro Ile Trp Thr                                                                                                   | L-Isoleucine                                                        |
| PE(20:4(5Z,8Z,11Z,14Z)/22:1(13Z))                                                                          | Farnesiferol B                                                                                                    | 11,13-dimethoxy-12-hydroxy-9-octadecenoic acid                      |
| 2-Methoxyestrone                                                                                           | gamma-Aminobutyric acid-betaxanthin                                                                               | 9(R)-HODE                                                           |
| (3b,6b,8a,12a)-8,12-Epoxy-7(11)-eremophilene-6,8,12-trimethoxy-3-ol                                        | Ala Phe                                                                                                           | Neryl glucoside                                                     |
| solasodine 3-O-beta-D-glucopyranoside                                                                      | 1-Octen-3-yl glucoside                                                                                            | Pinolenic Acid                                                      |
| C75                                                                                                        | Seriny-Tyrosine                                                                                                   | 12,13-DHOME                                                         |
| 3,5-Dimethyl-3'-isopropyl-L-thyronine                                                                      | Lys Arg Tyr Ala                                                                                                   | Imazodan                                                            |
| DG(2:0/PGJ2/0:0)                                                                                           | Gly Lys Pro Val                                                                                                   | 4-Hydroxypromazine                                                  |
| 5,6,7,8-Tetrahydromethanopterin                                                                            | Diosbulbin D                                                                                                      | 3-Hydroxy-5,9,17-trioxo-4,5:9,10-disecoandrosta-1(10),2-dien-4-oate |
| (5Z,8S,9E,11Z,14Z)-8-Hydroxyicosa-5,9,11,14-tetraenoylcarnitine                                            | Androsta-1,4-diene-3,17-dione                                                                                     | PC(2:0/20:5(7Z,9Z,11E,13E,17Z)-3OH(5,6,15))                         |
| Tridecanoic acid                                                                                           | (+)-trans-C75                                                                                                     | Arginyl-Gamma-glutamate                                             |
| 7,8-Dihydrovomifoliol 9-[rhamnosyl-(1->6)-glucoside]                                                       | Taurodeoxycholic acid                                                                                             | PGF2alpha-d4                                                        |
| Auxin b                                                                                                    | PA(18:0/0:0)                                                                                                      | 6-Carboxy-5,6,7,8-tetrahydropterin                                  |
| 9-Pentadecenoic acid                                                                                       | 17-trifluoromethylphenyl trinor PGF2 伪 ethyl amide                                                                | Collettiside I                                                      |
| Tridecanedioylcarnitine                                                                                    | Pro Pro Glu Arg                                                                                                   | CP 47,497-C8-homolog C-8-hydroxy metabolite                         |
| (6S,3'S,5'R,6'R)-6,3',5'-Trihydroxy-4,5,6',7'-tetrahydro-7,8,5',6'-tetrahydro-beta,beta-carotene-3,8-dione | Bis(agmatine)oxalamide                                                                                            | 3-Ketopetromyzonol sulfate                                          |
| bufalin                                                                                                    | 5-Hydroxyindoleacetyl glycine                                                                                     | Benzenediazonium                                                    |
| 7-Ethyl-2,3,6,7-tetrahydrocyclopent[b]azepin-8(1H)-one                                                     | gibberellin A8-catabolite                                                                                         | Eticyclidine                                                        |
| (6beta,8betaOH)-6,8-Dihydroxy-7(11)-eremophilen-12,8-olide                                                 | His Arg Met Trp                                                                                                   | dehydroabietadienol                                                 |
| 2,3-Dinor-8-iso prostaglandin F1alpha                                                                      | 5-Fluorodeoxyuridine                                                                                              | PS(P-16:0/13:0)                                                     |
| Irbesartan                                                                                                 | Antramycin                                                                                                        | 1-arachidonoyl-2-hydroxy-sn-glycero-3-phosphate                     |
| 7alpha-hydroxy-3-oxochol-4-en-24-oic Acid                                                                  | Cucurbitacin P                                                                                                    | 20-HETE ethanolamide                                                |

|                                                                                                                                                                                |                                                                                                                                                  |                                                                                                                                                     |
|--------------------------------------------------------------------------------------------------------------------------------------------------------------------------------|--------------------------------------------------------------------------------------------------------------------------------------------------|-----------------------------------------------------------------------------------------------------------------------------------------------------|
| 1,11-Undecanedicarboxylic acid                                                                                                                                                 | Threonylarginine                                                                                                                                 | MG(18:3(6Z,9Z,12Z)/0:0/0:0)                                                                                                                         |
| Cholic acid                                                                                                                                                                    | Dimethylphysostigmine                                                                                                                            | PGP(a-21:0/20:3(6,8,11)-OH(5))                                                                                                                      |
| 3b,12a-Dihydroxy-5a-cholanoic acid                                                                                                                                             | (1(10)E,4a,5E)-1(10),5-Germacradiene-12-acetoxy-4,11-diol                                                                                        | (9Z)-Hexadecenoic acid                                                                                                                              |
| PG(a-21:0/PGJ2)                                                                                                                                                                | PGF3                                                                                                                                             | Hypothiocyanite                                                                                                                                     |
| 13-Hydroxy-9-methoxy-10-oxo-11-octadecenoic acid                                                                                                                               | Bucromarone                                                                                                                                      | Triethylenemelamine                                                                                                                                 |
| Antein B                                                                                                                                                                       | PE(17:2(9Z,12Z)/0:0)                                                                                                                             | Vinagensenoside R4                                                                                                                                  |
| 3-Nonaprenyl-4-hydroxybenzoate                                                                                                                                                 | PC(O-6:0/2:0)[U]                                                                                                                                 | 5'-Butyrylphosphoinosine                                                                                                                            |
| trans-EKODE-(E)-Ib                                                                                                                                                             | Coutaric acid                                                                                                                                    | D-Glycerate                                                                                                                                         |
| Auxin a                                                                                                                                                                        | PA(14:0/20:4(7E,9E,11Z,13E)-3OH(5S,6R,15S))                                                                                                      | Isoleucyl-Glutamine                                                                                                                                 |
| Phospho-anandamide                                                                                                                                                             | (3xi,5Z)-1,5-Octadien-3-ol                                                                                                                       | N-(1-Deoxy-1-fructosyl)alanine                                                                                                                      |
| 5-Nonyltetrahydro-2-oxo-3-furancarboxylic acid                                                                                                                                 | N-Isobutyloctadeca-trans-2-trans-4-dienamide                                                                                                     | Thienamycin                                                                                                                                         |
| 18-carboxy dinor Leukotriene B4                                                                                                                                                | Tetramethylchromanol glucoside                                                                                                                   | Bethanechol                                                                                                                                         |
| Tetradecadienylcarnitine                                                                                                                                                       | Rocuronium                                                                                                                                       | (10S)-Juvenile hormone III diol phosphate                                                                                                           |
| 9,12,13-TriHOME                                                                                                                                                                | N-Stearoyl Asparagine                                                                                                                            | Trandolaprilat                                                                                                                                      |
| 2-(2-Methylbutanoyl)-9-(3-methyl-2E-pentenoyl)-2b,9a-dihydroxy-4Z,10(14)-oplopadien-3-one                                                                                      | SM(d20:1/5-iso PGF2VI)                                                                                                                           | 2-Butyl-5-[2-(4-hydroxy-3-methoxyphenyl)ethyl]furan                                                                                                 |
| DG(22:6(5Z,8E,10Z,13Z,15E,19Z)-2OH(7S, 17S)/12:0/0:0)                                                                                                                          | 1 伪,25-dihydroxy-11-(4-hydroxymethylphenyl)-9,11-didehydrovitamin D3 / 1 伪,25-dihydroxy-11-(4-hydroxymethylphenyl)-9,11-didehydrocholecalciferol | (1R,4E,6S,7S,17R)-4-Ethylidene-7-hydroxy-7-(hydroxymethyl)-6-methyl-2,9-dioxo-14-azatricyclo[9.5.1.014,17]heptadec-11-ene-3,8-dione                 |
| SM(d17:2(4E,8Z)/6 keto-PGF1alpha)                                                                                                                                              | 2-[[[3-Cyclohexyl-1-[2-[3-(diaminomethylideneamino)propylcarbamoyl]piperidin-1-yl]-1-oxopropan-2-yl]amino]acetic acid                            | (S)-N-((S)-1-Amino-3,3-dimethyl-1-oxobutan-2-yl)-2-((S)-2-mercapto-4-(3,4,4-trimethyl-2,5-dioximidazolidin-1-yl)butanamido)-N,4-dimethylpentanamide |
| (1S,2R,3R,4R,5R,6S,7S,8R,9R,10R,13R,14R,16S,17S,18R)-6,16,18-Trimethoxy-13-(methoxymethyl)-11-methyl-11-azahexacyclo[7.7.2.12,5.01,10.03,8.013,17]nonadecane-4,5,7,8,14-pentol | (E)-4-[[[(1R)-2-[[[(2R)-2-(2-Adamantylloxycarbonylamino)-3-(1H-indol-3-yl)-2-methylpropanoyl]amino]-1-phenylethyl]amino]-4-oxobut-2-enoic acid   | 5-Chloro-2,4-dihydroxy-6-methyl-3-[(2E,4Z)-3-methyl-5-(1,2,6-trimethyl-3-oxocyclohexyl)penta-2,4-dienyl]benzaldehyde                                |
| <b>Downregulated</b>                                                                                                                                                           |                                                                                                                                                  |                                                                                                                                                     |
| Gly-arg-gly-glu-ser-pro                                                                                                                                                        | (5alpha,8beta,9beta)-5,9-Epoxy-3,6-megastigmadien-8-ol                                                                                           | CE(22:6(5Z,8E,10Z,13Z,15E,19Z)-2OH(7S, 17S))                                                                                                        |
| Validoxyamine A 7'-phosphate                                                                                                                                                   | Leukotriene C4                                                                                                                                   | Momorcharaside B                                                                                                                                    |
| DG(14:1(9Z)/20:5(5Z,8Z,11Z,14Z,17Z)/0:0)                                                                                                                                       | PC(PGE1/2:0)                                                                                                                                     | PA(10:0/i-24:0)                                                                                                                                     |
| DG(17:0/22:6(4Z,7Z,10Z,12E,16Z,19Z)-OH(14)/0:0)                                                                                                                                | Palmitoyl Ara-C                                                                                                                                  | DG(15:0/22:5(4Z,7Z,10Z,13Z,16Z)/0:0)                                                                                                                |
| Tyr Lys Arg Glu                                                                                                                                                                | LysoPC(15:0/0:0)                                                                                                                                 | PC(16:1(9Z)/6 keto-PGF1alpha)                                                                                                                       |
| milbemycin beta3                                                                                                                                                               | PG(20:5(7Z,9Z,11E,13E,17Z)-3OH(5,6,15)/i-24:0)                                                                                                   | PE(P-18:1(11Z)/22:6(4Z,7Z,10Z,13Z,16Z,19Z))                                                                                                         |
| N-Oleoyleyl Glutamine                                                                                                                                                          | Tilmicosin                                                                                                                                       | PA(18:2(9Z,12Z)/16:0)                                                                                                                               |
| L-a-Lysophosphatidylserine                                                                                                                                                     | di-trans,poly-cis-Undecaprenyl diphosphate                                                                                                       | L-Phosphoarginine                                                                                                                                   |
| 6"-Deamino-6"-hydroxyparomomycin II                                                                                                                                            | 1-Palmitoyl Lysophosphatidic Acid                                                                                                                | Sphingosine                                                                                                                                         |
| (9Z)-12-oxo-dodec-9-enoate                                                                                                                                                     | Cholythreonine                                                                                                                                   | PS(14:0/18:2(9Z,12Z))                                                                                                                               |
| Coniferyl alcohol                                                                                                                                                              | Maraviroc                                                                                                                                        | Cholesterol                                                                                                                                         |
| all-trans-4-Oxoretinoic acid                                                                                                                                                   | Pexacerfont                                                                                                                                      | MG(0:0/20:2(11Z,14Z)/0:0)                                                                                                                           |
| [12]-Gingerdione                                                                                                                                                               | Cholyhistidine                                                                                                                                   | Ganglioside GM3 (d18:0/12:0)                                                                                                                        |
| Urocortisol                                                                                                                                                                    | PE-NMe2(20:0/18:1(11Z))                                                                                                                          | Polyporusterone B                                                                                                                                   |
| (+)-Setoclavine                                                                                                                                                                | 7',8'-Dihydro-8'-hydroxycitrinaxanthin                                                                                                           | Ecdysone                                                                                                                                            |
| LysoPE(P-16:0/0:0)                                                                                                                                                             | Destruxin E                                                                                                                                      | LysoPC(22:4(7Z,10Z,13Z,16Z))                                                                                                                        |
| Prostaglandin E2 methyl ester                                                                                                                                                  | Glycerol 2-(9Z,12Z-octadecadienoate) 1-hexadecanoate 3-O-                                                                                        | Irinotecan                                                                                                                                          |

[alpha-D-galactopyranosyl-(1->6)-beta-D-galactopyranoside]

|                                                                                                                                                          |                                                                                                                  |                                                                                                                                                                                                                                                              |
|----------------------------------------------------------------------------------------------------------------------------------------------------------|------------------------------------------------------------------------------------------------------------------|--------------------------------------------------------------------------------------------------------------------------------------------------------------------------------------------------------------------------------------------------------------|
| Plactin D                                                                                                                                                | PG(a-25:0/20:5(5Z,8Z,11Z,14Z,16E)-OH(18R))                                                                       | TetraHCA                                                                                                                                                                                                                                                     |
| L-Arginine                                                                                                                                               | DG(10:0/PGE1/0:0)                                                                                                | N-Myristoyl Glutamine                                                                                                                                                                                                                                        |
| CDP-DG(PGF2alpha/20:2(11Z,14Z))                                                                                                                          | Momordicine III                                                                                                  | Corosin                                                                                                                                                                                                                                                      |
| (2beta,3alpha,9alpha,24R)-Ergosta-7,22-diene-2,3,9-triol                                                                                                 | Glycochenodeoxycholate                                                                                           | Sapacitabine                                                                                                                                                                                                                                                 |
| PA(19:0/PGE1)                                                                                                                                            | LysoPC(18:1(9Z)/0:0)                                                                                             | N-Linoleoyl GABA                                                                                                                                                                                                                                             |
| PG(18:1(11Z)/18:3(6Z,9Z,12Z))                                                                                                                            | DG(8:0/PGJ2/0:0)                                                                                                 | PE(P-18:1(9Z)/18:3(10,12,15)-OH(9))                                                                                                                                                                                                                          |
| PA(a-25:0/PGE1)                                                                                                                                          | (5Z)-7-[(1R,2R,3R)-3-Hydroxy-2-[(1E,3S)-3-hydroxy-5-phenylpent-1-en-1-yl]-5-oxocyclopentyl]hept-5-enoylcarnitine | PS(18:0/20:3(8Z,11Z,14Z)-2OH(5,6))                                                                                                                                                                                                                           |
| Ponasterone A                                                                                                                                            | Chenodeoxycholyproline                                                                                           | PC(P-18:0/PGD2)                                                                                                                                                                                                                                              |
| (8S,9S,10S,11S,13S,14S,17R)-11,17-Dihydroxy-17-(2-hydroxyacetyl)-10,13-dimethyl-9-nonyl-1,2,6,7,8,11,12,14,15,16-decahydrocyclopenta[a]phenanthren-3-one | (24E)-3alpha-Acetoxy-15alpha,22S-dihydroxylanosta-7,9(11),24-trien-26-oic acid                                   | (1R,4R,4'R,5S,5'S,6R,6'S,7R,9R,11R,12R,13S,14S)-12-[(3R,4S,6R)-4-(Dimethylamino)-3-hydroxy-6-methyloxan-2-yl]oxy-4-ethyl-5,5',6,11-tetrahydroxy-4'-methoxy-4',5,6',7,9,11,13-heptamethylspiro[3,15,17-trioxabicyclo[12.4.0]octadecane-16,2'-oxane]-2,8-dione |
| (2E,4E)-N-[2-[[[(2R,3R,4R,5R,6S)-2-(1,2-Dihydroxyethyl)-4,5-dihydroxy-6-(7H-purin-6-ylamino)oxan-3-yl]amino]-2-oxoethyl]tetradeca-2,4-dienamide          | 1-O-Hexadecyl-sn-glycero-3-phosphocholine                                                                        | Filipin II                                                                                                                                                                                                                                                   |
| Octaethylene glycol                                                                                                                                      | Hovenidulcigenin B                                                                                               | 11-((2-Dimethylaminoethyl)oxymethyl)erythromycin A 9-methoxime                                                                                                                                                                                               |
| 7-[(1R,2R,3R)-3-Hydroxy-2-[(1E,3S)-3-Hydroxyoct-1-en-1-yl]-5-oxocyclopentyl]heptanoylcarnitine                                                           | Elamipretide                                                                                                     | 20-Oxo-5-O-beta-mycaminosyltylactone                                                                                                                                                                                                                         |
| Bafilomycin A1(Baf-A1)                                                                                                                                   | Cholylserine                                                                                                     | PE(18:3(9Z,12Z,15Z)/24:1(15Z))                                                                                                                                                                                                                               |
| LysoPG(16:0/0:0)                                                                                                                                         | Phoenicoxanthin                                                                                                  | PE(5-iso PGF2VI/22:0)                                                                                                                                                                                                                                        |
| Ternatin                                                                                                                                                 | N(4)-Oleoylcytosine arabinoside                                                                                  | Adrenoyl ethanolamide                                                                                                                                                                                                                                        |
| 24-Methylcholestanol ferulate                                                                                                                            | (Z)-3-Nonen-1-ol                                                                                                 | DG(22:6(4Z,7Z,10Z,12E,16Z,19Z)-OH(14)/10:0/0:0)                                                                                                                                                                                                              |
| PE(20:0/18:1(12Z)-2OH(9,10))                                                                                                                             | Glycocholic acid 3-sulfate                                                                                       | LysoPE(P-18:0/0:0)                                                                                                                                                                                                                                           |

## CL vs. CH

### Downregulated

|                                                                   |                                                                 |                                                           |
|-------------------------------------------------------------------|-----------------------------------------------------------------|-----------------------------------------------------------|
| Valylglutamine                                                    | Gentamicin C1                                                   | Aminoethylcysteine ketimine                               |
| Carboxyethyl-hydroxychroman                                       | Pikromycin                                                      | Ethyl L-tryptophanate                                     |
| Valylthreonine                                                    | Pravastatin                                                     | 1-Methoxy-4-[5-(4-methoxyphenoxy)-3-penten-1-ynyl]benzene |
| Maleic acid                                                       | Amyloid beta-peptide(25-35)                                     | 3-(4-Iodophenyl)-2-mercapto-(Z)-2-propenoic acid          |
| L-Malic acid                                                      | PE(20:4(5Z,8Z,11Z,14Z)/22:1(13Z))                               | GDC-0834 Racemate                                         |
| Amyl 2-furoate                                                    | C75                                                             | Lividamine                                                |
| 5-(3',5'-Dihydroxyphenyl)-gamma-valerolactone-O-sulphate-O-methyl | DG(2:0/PGJ2/0:0)                                                | 2-ISOPROPYL-3-METHOXYCINNAMIC ACID                        |
| Uric acid                                                         | 5,6,7,8-Tetrahydromethanopterin                                 | Pinolidoxin                                               |
| 2-Methyl-3-oxopropanoic acid                                      | (5Z,8S,9E,11Z,14Z)-8-Hydroxyicosa-5,9,11,14-tetraenoylcarnitine | Deferiprone                                               |
| 1,7-Diphospho-1-epi-valienol                                      | Tridecanoic acid                                                | Caranine                                                  |
| Cephameycin C                                                     | 7,8-Dihydrovomifoliol 9-[rhamnosyl-(1->6)-glucoside]            | Myricanone                                                |

|                                                             |                                                                                                       |                                                                                              |
|-------------------------------------------------------------|-------------------------------------------------------------------------------------------------------|----------------------------------------------------------------------------------------------|
| 3-Hydroxynorvaline                                          | 3-Hydroxylinoleoylcarnitine                                                                           | 5-(3-Methoxy-4-((4-methoxybenzyl)oxy)benzyl)pyrimidine-2,4-diamine                           |
| Xanthine                                                    | LysoPE(P-16:0/0:0)                                                                                    | Cheirotoxol                                                                                  |
| 3-Dehydroquinic acid                                        | Senegenin                                                                                             | (2R,5R)-2-[6-(Cyclopentylamino)-8-(methylamino)purin-9-yl]-5-(hydroxymethyl)oxolane-3,4-diol |
| Olprinone                                                   | PI(20:3(5Z,8Z,11Z)/TXB2)                                                                              | Pro Ala Met His                                                                              |
| EMycin E                                                    | Soyasaponin I                                                                                         | 2-(3-Carboxy-3-(methylammonio)propyl)-L-histidine                                            |
| Marmesin galactoside                                        | 1,11-Undecanedicarboxylic acid                                                                        | Allosamidin                                                                                  |
| Egonol gentiobioside                                        | 13-Hydroxy-9-methoxy-10-oxo-11-octadecenoic acid                                                      | midecamycin                                                                                  |
| 2',4-Dihydroxy-4',6'-dimethoxychalcone                      | Antcin B                                                                                              | Mozenavir                                                                                    |
| 2,5-Diamino-6-(5-phospho-D-ribitylamino)pyrimidin-4(3H)-one | PI(PGJ2/18:2(9Z,12Z))                                                                                 | Flobetair                                                                                    |
| Rhizoctin A                                                 | Esculeogenin A                                                                                        | Melibiotol                                                                                   |
| 3-Dehydroquinate                                            | (ent-2b,4S,9a)-2,4,9-Trihydroxy-10(14)-oplopen-3-one 2-(2-methylbutanoate) 9-(3-methyl-2E-pentenoate) | Cytochalasin Npho                                                                            |
| Guanosine                                                   | SM(d17:2(4E,8Z)/6 keto-PGF1alpha)                                                                     | Ttatpn                                                                                       |
| Inosine                                                     | Brefeldin A                                                                                           | Histidylglutamine                                                                            |
| Succinic acid                                               | 3-Palmitoylcatechin                                                                                   | 5,9,11-trihydroxyprosta-6E,14Z-dien-1-oate                                                   |
| Xanthosine                                                  | Prallethrin                                                                                           | Thr His Phe His                                                                              |
| 2,3,4,5-Tetrahydro-7,8-dihydroxy-1-phenyl-1H-3-benzazepine  | 11-Ketotestosterone                                                                                   | PIP(20:3(5Z,8Z,11Z)/PGE2)                                                                    |
| 2-Amino-6-methyl-2,3,6,7-tetrahydro-1H-pteridin-4-one       | PG(i-24:0/20:3(5Z,8Z,11Z)-O(14R,15S))                                                                 | PS(20:5(5Z,8Z,11Z,14Z,17Z)/20:5(7Z,9Z,11E,13E,17Z)-3OH(5,6,15))                              |
| Methyl-3H-thymidine                                         | 28-Glucosyloleanolic acid 3-[arabinosyl-(1->2)-6-methylglucuronide]                                   | Tropolone                                                                                    |
| trans-Zeatin                                                | CL(8:0/11:0/11:0/11:0)                                                                                | (+)-Carbovir                                                                                 |
| Zipeprol                                                    | Dehydroxypaxilline                                                                                    | Annomuricatin A                                                                              |
| 4-ethylamino-6-isopropylamino-1,3,5-triazin-2-ol            | PE-NMe2(22:4(7Z,10Z,13Z,16Z)/22:5(4Z,7Z,10Z,13Z,16Z))                                                 | Thr Trp Tyr Gln                                                                              |
| 6-Hydroxy-3,4-dihydro-2(1H)-quinolinone                     | PI(18:0/PGF2alpha)                                                                                    | Rebaudioside B                                                                               |
| 16-phenoxy tetranor Prostaglandin A2                        | PS(22:1(13Z)/16:0)                                                                                    | cis-1,2-Dihydrobenzene-1,2-diol                                                              |
| DG(12:0/22:6(4Z,7Z,11E,13Z,15E,19Z)-2OH(10S,17)/0:0)        | PI(16:0/PGF1alpha)                                                                                    | Dakh peptide                                                                                 |
| DG(17:0/22:6(4Z,7Z,10Z,12E,16Z,19Z)-OH(14)/0:0)             | geneticin                                                                                             | herbimycin a                                                                                 |
| Prostalene                                                  | 5-Isopropyl-2-(2-methylpropyl)-2-cyclohexen-1-one                                                     | Isopentenyladenine-9-N-glucoside                                                             |
| Pubescenol                                                  | Tetradecanedioic acid                                                                                 | Neuromedin B (4-10)                                                                          |
| L-a-Lysophosphatidylserine                                  | Adynerin                                                                                              | Satratoxin G                                                                                 |
| PE(18:3(6Z,9Z,12Z)/PGJ2)                                    | Ser Gln Leu Lys                                                                                       | Andersoline                                                                                  |
| 3-Oxodecanoic acid                                          | Nateglinide                                                                                           | Myrigalone H                                                                                 |
| Neoisomidecamycin                                           | N-Stearoyl tyrosine                                                                                   | Naldemedine                                                                                  |
| 4'-Hydroxyacetophenone                                      | Nebramine                                                                                             | Pyripropene A                                                                                |
| Loganin                                                     | PE(20:0/LTE4)                                                                                         | gamma-L-Glutamyl-butirosin B                                                                 |
| PGP(a-21:0/PGJ2)                                            | Hovenine A                                                                                            | Amino (2S)-2-amino-4-methylpentanoate                                                        |
| Buflomedil                                                  | PG(18:1(11Z)/18:3(6Z,9Z,12Z))                                                                         | Bms-275183                                                                                   |
| CDP-DG(PGE2/a-25:0)                                         | 9-Decenoylcholine                                                                                     | beta-D-Glucopyranosyl-11-hydroxyjasmonic acid                                                |
| CDP-DG(i-22:0/a-21:0)                                       | Nigericin                                                                                             | Physagulin C                                                                                 |

|                                                                                      |                                                                        |                                                                                              |
|--------------------------------------------------------------------------------------|------------------------------------------------------------------------|----------------------------------------------------------------------------------------------|
| Valerylglycine                                                                       | (S)-2-Aminobutanoate                                                   | Thr Phe Phe Phe                                                                              |
| Pro-Pro-Phe                                                                          | Cer(d18:2(4E,14Z)/6 keto-PGF1alpha)                                    | Paromamine                                                                                   |
| Topiramate                                                                           | O-Acetyl-L-serine                                                      | 5-Amino-2,3-dihydro-6-(3-hydroxy-4-methoxy-1-oxobutyl)-2,2-dimethyl-4H-1-benzopyran-4-one    |
| 4,1-Benzoxazepine                                                                    | 2-Methyl-1,3-cyclohexadiene                                            | Gly Lys Tyr Gly                                                                              |
| PA(14:1(9Z)/TXB2)                                                                    | O-Acetylserine                                                         | Guan-fu base A                                                                               |
| CDP-DG(i-12:0/5-iso PGF2VI)                                                          | Isohumulone A                                                          | Arginyl-glycyl-glutamyl-serine                                                               |
| Avermectin                                                                           | gamma-Tocotrienol                                                      | Nefiracetam                                                                                  |
| PS(5-iso PGF2VI/18:2(9Z,12Z))                                                        | 2-carboxy-L-xylonolactone                                              | PGP(i-13:0/18:3(10,12,15)-OH(9))                                                             |
| Methyl 5-(hydroxymethyl)pyrrolidine-3-carboxylate                                    | 6'-Oxogentamicin X2                                                    | 4-Hydroxy-5-phenyltetrahydro-1,3-oxazin-2-one                                                |
| CDP-DG(22:3(10Z,13Z,16Z)/PGF2alpha)                                                  | 1,25-Dihydroxy-19-norvitamin D3                                        | 2-OH-benzyl                                                                                  |
| Castanospermine                                                                      | 14-OH Clarithromycin                                                   | 2-Methoxy-estradiol-17beta 3-glucuronide                                                     |
| beta-Neoeendorphin                                                                   | PC(24:1(15Z)/22:6(5Z,7Z,10Z,13Z,16Z,19Z)-OH(4))                        | alpha-Campholonic acid                                                                       |
| CDP-DG(a-15:0/20:3(6,8,11)-OH(5))                                                    | Glu Ile Arg Glu                                                        | 2-Hydroxypropyl starch                                                                       |
| Articainic acid                                                                      | PG(i-24:0/PGF1alpha)                                                   | Lochnerinine                                                                                 |
| Asparasaponin II                                                                     | 9(R)-HETE                                                              | Desglugastrin                                                                                |
| Cucurbitacin B 2-sulfate                                                             | (1E,4S,5E,7R)-Germacra-1(10),5-dien-11-ol                              | (3xi,6xi)-Cyclo(alanylvalyl)                                                                 |
| Reduced FMN                                                                          | Glucosylxanthone                                                       | Ibudilast                                                                                    |
| Neuropeptide FF                                                                      | PC(15:0/P-16:0)                                                        | L-phenylalanyl-L-hydroxyproline                                                              |
| Dihydrooucanate                                                                      | Pyropheophorbide a                                                     | TRIMETHYLCOLCHICINIC ACID                                                                    |
| 5-Pyrimidinecarboxylic acid, 1,4-dihydro-2-((2-(2-methylpropoxy)phenyl)amino)-4-oxo- | 1-Stearoylglycerophosphoserine                                         | Propanoic acid, 2-hydroxy-3-[(4-hydroxy-1-naphthalenyl)oxy]-                                 |
| CDP-DG(a-25:0/PGF2alpha)                                                             | PG(a-25:0/20:5(5Z,8Z,11Z,14Z,16E)-OH(18R))                             | 9-beta-d-Arabinofuranosylguanine                                                             |
| CDP-DG(TXB2/i-22:0)                                                                  | LysoPE(P-18:1(9Z)/0:0)                                                 | Coumarin                                                                                     |
| 2'-Fluoro-2',3'-dideoxyinosine                                                       | Cholylserine                                                           | 5-(3-Pyridyl)-2-hydroxytetrahydrofuran                                                       |
| N-Formylmethionine                                                                   | (2R,3R)-3-Methylornithinyl-N6-lysine                                   | (E)-5-(1-(2-Hydroxyethyl)-3-(pyridin-4-yl)-1H-pyrazol-4-yl)-2,3-dihydro-1H-inden-1-one oxime |
| 3-Methylhippuric acid                                                                | 20-Oxo-5-O-beta-mycaminosyltylactone                                   | N-Acetylneuraminate 9-phosphate                                                              |
| Indole                                                                               | Dynorphin A (6-8)                                                      | L-Phosphoarginine                                                                            |
| 3'-Deoxyderhamnosylmaysin                                                            | Volicitin                                                              | (+)-Galeon                                                                                   |
| CDP-DG(i-14:0/18:1(9Z)-O(12,13))                                                     | LysoPE(P-18:0/0:0)                                                     | Neomycin                                                                                     |
| Hexanoylglycine                                                                      | Juvenile hormone III                                                   | Dihydrotestosterone diglucuronide                                                            |
| N,N-Didesmethyltamoxifen                                                             | N-Linoleoyl Lysine                                                     | pyrithione                                                                                   |
| Bufotalin                                                                            | LysoPG(16:0/0:0)                                                       | 2-Hydroxycampholonic acid                                                                    |
| Tryptophyl-Gamma-glutamate                                                           | Carbocyclic thromboxane A2                                             | 5-(3'-Carboxy-3'-oxopropenyl)-4,6-dihydroxypicolinate                                        |
| Norfuraneol                                                                          | (3b,16a,21b,22a)-12-Oleanene-3,16,21,23,28-pentol-22-angeloyloxy-23-al | Iminoaspartic acid                                                                           |
| Tragopogonsaponin D                                                                  | PE(20:0/18:1(12Z)-2OH(9,10))                                           | 4,6-O-Ethylidene-D-glucose                                                                   |
| 2-Hydroxyglutaric acid lactone                                                       | PS(15:0/24:1(15Z))                                                     | (2R,4S)-1-Tert-Butyl 2-methyl 4-aminopyrrolidine-1,2-dicarboxylate                           |
| Glycolate                                                                            | 3-Methylxanthine                                                       | 1-(2-Hydroxyethyl-2-hydroxymethyl)-5-nitro-imidazole                                         |
| 2,6,6-Trimethyl-2-cyclohexene-1,4-dione                                              | DG(15:0/22:6(5Z,7Z,10Z,13Z,16Z,19Z)-OH(4)/0:0)                         | Pro-phe-arg-mca                                                                              |
| Linamarin                                                                            | Pleurotin                                                              | 5-Formiminotetrahydrofolic acid                                                              |
| 3,4-Dihydro-4-[(5-methyl-2-furanyl)methylene]-2H-pyrrole                             | 8,11-eicosadiynoic acid                                                | PIP(PGJ2/18:2(9Z,12Z))                                                                       |

|                                                                  |                                                                                                                      |                                                                             |
|------------------------------------------------------------------|----------------------------------------------------------------------------------------------------------------------|-----------------------------------------------------------------------------|
| 17beta-Estradiol-3,4-quinone                                     | Pregnanetriolone                                                                                                     | (R)-6'-O-(4-Geranyloxy-2-hydroxycinnamoyl)-marmin                           |
| Nalidixic acid                                                   | 1-(9Z-tetradecenoyl)-glycero-3-phosphate                                                                             | PS(22:0/20:3(6,8,11)-OH(5))                                                 |
| Phenol A                                                         | Isoacitrein                                                                                                          | PS(18:0/PGF2alpha)                                                          |
| 4-Methoxybenzenepropanol 1-(2-sulfoglucoside)                    | Biocytin                                                                                                             | Fructosamine                                                                |
| CDP-DG(a-13:0/20:3(5Z,8Z,11Z)-O(14R,15S))                        | Gacyclidine                                                                                                          | 5-(3,4-Dihydroxy-1,5-cyclohexadien-1-yl)-5-ethylbarbituric acid             |
| Glutamic acid diethyl ester                                      | (S)-3-{4-[2-(5-Methyl-2-phenyl-oxazol-4-yl)-ethoxy]-phenyl}-2-propylamino-propionic acid                             | (1R,6R)-6-hydroxy-2-succinylcyclohexa-2,4-diene-1-carboxylate               |
| Lentialexin                                                      | Fludrocortisone acetate                                                                                              | PE(22:4(7Z,10Z,13Z,16Z)/PGD2)                                               |
| 4-Hydroxycinnamyl aldehyde                                       | 6'-Apiosyllotaustralin                                                                                               | PS(20:2(11Z,14Z)/PGE2)                                                      |
| N-Acetyl-L-phenylalanine                                         | Risperidone                                                                                                          | PI(16:0/20:3(5Z,8Z,11Z)-O(14R,15S))                                         |
| 5-Hydroxyindoleacetaldehyde                                      | PG(16:0/0:0)[U]                                                                                                      | PG(18:1(11Z)/LTE4)                                                          |
| PIP(18:2(9Z,12Z)/PGE2)                                           | Dehydroepiandrosterone sulfate                                                                                       | 3-Methyl-2-oxindole                                                         |
| Baicalin                                                         | 7Z, 10Z, 13Z, 16Z, 19Z-docosapentaenoic acid                                                                         | 2-Amino-5-formylamino-6-(5-phospho-D-riboseylamino)pyrimidin-4(3H)-one      |
| Swainsonine                                                      | Biopterin                                                                                                            | Methylpyrogallol sulfate 3                                                  |
| Cholylglutamine                                                  | DG(18:4(6Z,9Z,12Z,15Z)/20:1(11Z)/0:0)                                                                                | PI(5-iso PGF2VI/22:6(4Z,7Z,10Z,13Z,16Z,19Z))                                |
| Avermectin B1b aglycone                                          | 17-O-acetylnorajmaline                                                                                               | Neopeltitorine A                                                            |
| Indoleacetaldehyde                                               | 2,3-Dehydrosalvipisone                                                                                               | Methyl linolenate                                                           |
| Trihomomethionine                                                | Acorafloxacin                                                                                                        | Furfural diethyl acetal                                                     |
| 5,7-Dihydroxyflavone                                             | Corchoionol C 9-glucoside                                                                                            | 2,2-Bis(4-hydroxyphenyl)-propanoic acid                                     |
| N-Acetyl-DL-tryptophan                                           | Kurarinone                                                                                                           | 5,7-Dimethoxy-6-C-methylflavanone                                           |
| Nodularin                                                        | O-Demethylencaïnide                                                                                                  | Fludara                                                                     |
| Paeonimetabolin I                                                | Posiphen                                                                                                             | (R)-pantoate                                                                |
| N-Acetyl-D-phenylalanine                                         | Moxifloxacin                                                                                                         | 21-Deoxycortisol                                                            |
| Aspartyl-Isoleucine                                              | 5-Chloro-2,4-dihydroxy-6-methyl-3-[(2E,4Z)-3-methyl-5-(1,2,6-trimethyl-3-oxocyclohexyl)penta-2,4-dienyl]benzaldehyde | 4-Amino-1-[(2R,5R)-5-(aminomethyl)-3,4-dihydroxyoxolan-2-yl]pyrimidin-2-one |
| 2-Methyl-4-(pyridin-3-ylethynyl)thiazole                         | UDP-L-rhamnose                                                                                                       | 2-Fluoroamphetamine                                                         |
| Jasmonic acid                                                    | Hypermellosum                                                                                                        | L-4-Hydroxyglutamate semialdehyde                                           |
| 4-Coumaroylshikimate                                             | 1H-Indole-3-carboxylic acid, 1-methyl-, (1-(2-((methylsulfonyl)amino)ethyl)-4-piperidinyl)methyl ester               | Littorine                                                                   |
| Goshonoside F6                                                   | cis-3-Hexenyl b-primeveroside                                                                                        | trans-3-Hydroxy-L-proline                                                   |
| Nartograstim                                                     | latrunculin B                                                                                                        | Vitamin D2 3-glucuronide                                                    |
| Intopicline                                                      | Linalool oxide D 3-[apiosyl-(1->6)-glucoside]                                                                        | N-Nitroso(2-hydroxypropyl)(2-oxopropyl)amine                                |
| 5-Amino-5-(4-hydroxybenzyl)-6-(D-ribitylimino)-5,6-dihydrouracil | Tetrahydrofolate                                                                                                     | L-Threonine                                                                 |
| 2-Ethylsulfanyl-1H-benzoimidazole                                | N-Acetylgalactosamine                                                                                                | L-Alanine                                                                   |
| 2"-N-Acetyl-6"-deamino-6"-hydroxyncomycin C                      | N-Phenyl-1-naphthylamine                                                                                             | Pentylbenzene                                                               |
| Val-HoPhe-OH                                                     | Parsalmide                                                                                                           | Hydantoin-5-propionic acid                                                  |
| 2-Hydroxy-2,4-pentadienoate                                      | PA(a-25:0/5-iso PGF2VI)                                                                                              | L-Proline                                                                   |
| Toluene-cis-dihydrodiol                                          | PG(20:4(5Z,8Z,11Z,14Z)-OH(20)/20:1(11Z))                                                                             | Sphingosine 1-phosphate                                                     |
| 7-Hydroxy-3-(3-hydroxy-4-methoxybenzyl)-5-methoxy-4-chromanone   | Arbutin                                                                                                              | 4-Aminobutyraldehyde                                                        |

|                                                                                                                        |                                                                                                                                                |                                                                                                                                                  |
|------------------------------------------------------------------------------------------------------------------------|------------------------------------------------------------------------------------------------------------------------------------------------|--------------------------------------------------------------------------------------------------------------------------------------------------|
| PA(8:0/5-iso PGF2VI)                                                                                                   | gamma-Aminobutyric acid cetyl ester                                                                                                            | Kamahine C                                                                                                                                       |
| Baicalein                                                                                                              | beta-Tocotrienol                                                                                                                               | 3-(4'-Methylthio)butylmalic acid                                                                                                                 |
| N-Docosahexaenoyl Histidine                                                                                            | Heneicosanoic acid                                                                                                                             | Methionyl-Proline                                                                                                                                |
| Chaetoglobosin N                                                                                                       | PS(20:3(5Z,11Z,14Z)-O(8,9)/24:0)                                                                                                               | Lys His Val Asp                                                                                                                                  |
| estradiol alone                                                                                                        | Fraxidin                                                                                                                                       | L-Arginine, L-asparaginyglycyl-                                                                                                                  |
| Stevibioside                                                                                                           | PI(18:0/PGJ2)                                                                                                                                  | Farnesiferol B                                                                                                                                   |
| Dalfopristin                                                                                                           | PE(14:0/20:1(11Z))                                                                                                                             | gamma-Aminobutyric acid-betaxanthin                                                                                                              |
| Ixabepilone                                                                                                            | Hydroxylamine                                                                                                                                  | 2,3-Dihydroxypropyl 4-phenylbutanoate                                                                                                            |
| Cascarillin                                                                                                            | 1,2-Epoxy-1,2,7',8,8',11,12-octahydro-psi,psi-carotene                                                                                         | Ala Phe                                                                                                                                          |
| 2,6 Dimethylheptanoyl carnitine                                                                                        | 3-Methyl-L-histidine                                                                                                                           | 2-Propylmalate                                                                                                                                   |
| 9-Oxononanoic acid                                                                                                     | DG(16:0/TXB2/0:0)                                                                                                                              | 6-methoxy Naphthalene Acetic Acid                                                                                                                |
| Dihydrosesoside                                                                                                        | Spirolide D                                                                                                                                    | Diosbulbin D                                                                                                                                     |
| 16-Acetylpriverogenin A                                                                                                | PE(20:1(11Z)/18:1(12Z)-2OH(9,10))                                                                                                              | Androsta-1,4-diene-3,17-dione                                                                                                                    |
| L-Urobilin                                                                                                             | PE(24:0/PGE2)                                                                                                                                  | Taurodeoxycholic acid                                                                                                                            |
| Sebacic acid                                                                                                           | Muricatetrocin C                                                                                                                               | (-)-Fumigaclavine B                                                                                                                              |
| 2'-Deamino-2'-hydroxyparomamine                                                                                        | DG(17:0/TXB2/0:0)                                                                                                                              | PA(18:0/0:0)                                                                                                                                     |
| Glasdegib                                                                                                              | DG(21:0/LTE4/0:0)                                                                                                                              | 17-trifluoromethylphenyl trinor PGF2 伪 ethyl amide                                                                                               |
| O-Acetylcarnitine                                                                                                      | N-Nervonoyl Glutamine                                                                                                                          | Pro Pro Glu Arg                                                                                                                                  |
| Pentamorphone                                                                                                          | Homodolicholide                                                                                                                                | Dimethyl peroxide                                                                                                                                |
| Etimicin                                                                                                               | 1,2-Didecanoyl-sn-glycerol                                                                                                                     | His Arg Met Trp                                                                                                                                  |
| (2s)-2-[[[(2s)-2-Acetamido-5-[[n-(Methylcarbamoyl)carbamimidoyl]amino]pentanoyl]-Methyl-Amino]-3-Phenyl-Propanoic Acid | (E)-4-[[[(1R)-2-[[[(2R)-2-(2-Adamantylloxycarbonylamino)-3-(1H-indol-3-yl)-2-methylpropanoyl]amino]-1-phenylethyl]amino]-4-oxobut-2-enoic acid | 1 伪,25-dihydroxy-11-(4-hydroxymethylphenyl)-9,11-didehydrovitamin D3 / 1 伪,25-dihydroxy-11-(4-hydroxymethylphenyl)-9,11-didehydrocholecalciferol |
| (24E)-3alpha-Acetoxy-15alpha-hydroxy-23-oxo-7,9(11),24-lanostatrien-26-oic acid                                        | 4-Formylsalicylic acid                                                                                                                         | Bucromarone                                                                                                                                      |
| 17alpha,21-Dihydroxy-5beta-pregnane-3,11,20-trione                                                                     | Mdppb                                                                                                                                          | PE(17:2(9Z,12Z)/0:0)                                                                                                                             |
| Ile Ser Val Asp                                                                                                        | 12-Ketodeoxycholic acid                                                                                                                        | Ile Ala                                                                                                                                          |
| N-[(3a,5b,7a)-3-hydroxy-24-oxo-7-(sulfooxy)cholan-24-yl]-Glycine                                                       | Dactimicin                                                                                                                                     | Zerumbone                                                                                                                                        |
| Pectachol                                                                                                              | Triphenylphosphine oxide                                                                                                                       | Ginsenoynne J                                                                                                                                    |
| L-N2-(2-Carboxyethyl)arginine                                                                                          | 2'-O-Methylcytidine                                                                                                                            | PA(14:0/20:4(7E,9E,11Z,13E)-3OH(5S,6R,15S))                                                                                                      |
| L-Oleandrosyl-oleandolide                                                                                              | 5-Methyl-2-furaldehyde                                                                                                                         | PGF3 伪                                                                                                                                           |
| Eperezolid                                                                                                             | Adipic acid                                                                                                                                    | gamma-CEHC glucuronide                                                                                                                           |
| 3-[2-[[[(1S,2R,3S)-3-[4-(Pentylcarbamoyl)-1,3-oxazol-2-yl]-7-oxabicyclo[2.2.1]heptan-2-yl]methyl]phenyl]propanoic acid | ((2R,3S)-3-Amino-2-hydroxy-2-(1H-imidazol-4-ylmethyl)-5-methyl)-5-methylhexanoic Acid                                                          | Prenyl glucoside                                                                                                                                 |
| Genistein                                                                                                              | Torulene                                                                                                                                       | Estreptoquinasa                                                                                                                                  |
| Ganoderenic acid A                                                                                                     | PE(P-18:1(11Z)/22:6(4Z,7Z,10Z,13Z,16Z,19Z))                                                                                                    | Ecklonialactone A                                                                                                                                |
| 19-Hydroxyandrost-4-ene-3,17-dione                                                                                     | PA(22:0/20:4(5Z,8Z,10E,14Z)-OH(12S))                                                                                                           | Docosatrienoic Acid                                                                                                                              |
| Isobutylxanthine                                                                                                       | SM(d16:2(4E,8Z)/5-iso PGF2VI)                                                                                                                  | 1-Methyl-4-phenyl-1,2,3,6-tetrahydropyridine                                                                                                     |
| 11-Dihydro-12-norneoquassin                                                                                            | Cer(d18:1/20:5(7Z,9Z,11E,13E,17Z)-3OH(5,6,15))                                                                                                 | 1-H-Inden-1-one,2,3-dihydro-3,3,5,6-tetramethyl                                                                                                  |
| Dimethyltryptamine                                                                                                     | 6-Hydroxymethylpterin                                                                                                                          | Isoleucylhydroxyproline                                                                                                                          |
| Bargustanine                                                                                                           | Cinitapride                                                                                                                                    | 3,4-Dihydroxy-2-methoxy-4-methyl-3-[2-methyl-3-(3-methyl-but-2-enyl)-oxiranyl]-cyclohexanone                                                     |
| Pracinostat                                                                                                            | PG(a-13:0/i-16:0)                                                                                                                              | 2-Ethylidene-1,5-dimethyl-3,3-diphenylpyrrolidine                                                                                                |

|                                                                                                                                        |                                                                                                                                                                                             |                                                                                                 |
|----------------------------------------------------------------------------------------------------------------------------------------|---------------------------------------------------------------------------------------------------------------------------------------------------------------------------------------------|-------------------------------------------------------------------------------------------------|
| PC(P-18:1(11Z)/LTE4)                                                                                                                   | PS(20:1(11Z)/14:0)                                                                                                                                                                          | VIQUALINE                                                                                       |
| N-[(3a,5b,7b)-7-hydroxy-24-oxo-3-(sulfooxy)cholan-24-yl]-Glycine                                                                       | Chrysin 7-[rhamnosyl-(1->4)-glucoside]                                                                                                                                                      | 2alpha-Fluoro-17beta-hydroxyandrost-4-en-3-one                                                  |
| PA(20:1(11Z)/PGF1alpha)                                                                                                                | Cer(d18:2(4E,14Z)/24:1(15Z))                                                                                                                                                                | 15(R)-PGF2 伪                                                                                    |
| (5Z,8Z,11Z,14Z)-N-(4-Hydroxy-2-methylphenyl)-5,8,11,14-eicosatetraenamide                                                              | Methyl Heptadecanoic acid                                                                                                                                                                   | Illicifolinolide A                                                                              |
| PC(DiMe(13,5)/22:6(5Z,8E,10Z,13Z,15E,19Z)-2OH(7S,17S))                                                                                 | PC(24:1(15Z)/PGF2alpha)                                                                                                                                                                     | Arg Pro Lys                                                                                     |
| N-Palmitoyl tyrosine                                                                                                                   | PA(18:2(9Z,12Z)/16:0)                                                                                                                                                                       | Glycocholic Acid                                                                                |
| (5E)-7-{4,6-Dihydroxy-2-[(1E,5E)-3-hydroxyocta-1,5-dien-1-yl]oxan-3-yl}hept-5-enoylcarnitine                                           | Benzothiazepine                                                                                                                                                                             | 3-Carbamyl-(3'-picolyl)-4-methoxy-1-benzamide                                                   |
| (Z)-6-Nonenal                                                                                                                          | N-Oleoyl Asparagine                                                                                                                                                                         | PI(20:1(11Z)/20:3(8Z,11Z,14Z)-2OH(5,6))                                                         |
| Anadur                                                                                                                                 | Solanesol                                                                                                                                                                                   | (-)-5-(2-Propenyl)-2-oxazolidinethione                                                          |
| PC(PGF1alpha/22:3(10Z,13Z,16Z))                                                                                                        | PE(16:1(9Z)/18:1(12Z)-O(9S,10R))                                                                                                                                                            | Deoxycholicitrulline                                                                            |
| PG(18:1(12Z)-2OH(9,10)/i-24:0)                                                                                                         | SM(d17:2(4E,8Z)/5-iso PGF2VI)                                                                                                                                                               | Pro Lys Leu Ser                                                                                 |
| Demethoxyrapamycin                                                                                                                     | PA(18:3(10,12,15)-OH(9)/22:2(13Z,16Z))                                                                                                                                                      | PI(20:4(5Z,8Z,11Z,14Z)/20:0)                                                                    |
| Deoxychylserine                                                                                                                        | Thiazolidin-2-one                                                                                                                                                                           | PS(20:4(6Z,8E,10E,14Z)-2OH(5S,12R)/22:0)                                                        |
| Ouabain                                                                                                                                | Fluorophosphoric acid                                                                                                                                                                       | (凶)16-HDoHE                                                                                     |
| 5-Oxo-delta-bilirubin                                                                                                                  | Biotin amide                                                                                                                                                                                | Nebracetam                                                                                      |
| Nelipepimut-S                                                                                                                          | 3-(1-Hydroxymethyl-1-propenyl)pentanedioic acid                                                                                                                                             | 1-Hexanol arabinosylglucoside                                                                   |
| 1-[(2R)-2-(1,3-Benzodioxol-4-yl)heptyl]-3-[2,6-di(propan-2-yl)phenyl]urea                                                              | 3-hydroxybenzoic acid-3-O-sulphate                                                                                                                                                          | alpha-L-Rhamnopyranosyl-(1->3)-alpha-D-galactopyranosyl-(1->3)-L-fucose                         |
| 4alpha-carboxy-5alpha-cholesta-8,24-dien-3beta-ol                                                                                      | p-Coumaroylagmatine                                                                                                                                                                         | 5(S),11(R)-DiHETE                                                                               |
| Dibenzepin                                                                                                                             | D-Tryptophan                                                                                                                                                                                | 1,4-Dihydroxy-2-naphthoate                                                                      |
| (3a,5b,7a)-23-Carboxy-7-hydroxy-24-norcholan-3-yl-b-D-Glucopyranosiduronic acid                                                        | Feruloylputrescine                                                                                                                                                                          | Ciclesonide                                                                                     |
| Periandrin V                                                                                                                           | Ciprofloxacin-7-ethylenediamine                                                                                                                                                             | Sarcodon scabrosus Depsipeptide                                                                 |
| Dodecanedioic acid                                                                                                                     | Taribavirin                                                                                                                                                                                 | PG(20:1(11Z)/PGE2)                                                                              |
| Cyclosquamosin A                                                                                                                       | n6-phenylisopropyladenosine                                                                                                                                                                 | Asiaticoside B                                                                                  |
| gamma-Chaconine                                                                                                                        | PE(TXB2/14:1(9Z))                                                                                                                                                                           | (+)-Lysergic acid                                                                               |
| Guanidine, N-((2S,3S,4R)-6-amino-2-(dimethoxymethyl)-3,4-dihydro-3-hydroxy-2-methyl-2H-1-benzopyran-4-yl)-N'-cyano-N''-(phenylmethyl)- | 1H-2-Benzopyran-6-carboxamide, 1-(2-(4-(4-((2R,3S,4S,6R,7S,8R)-4-Ethenyl-3-hydroxy-2,4,7,14-tetramethyl-9-oxo-6-tricyclo[5.4.3.0.1,8]tetradecanyl) 2-[2-(diethylamino)ethylsulfanyl]acetate | 2-(1,3-Benzodioxol-5-yl)-3,5,6,8-tetramethoxy-7-[(3-methyl-2-butenyl)oxy]-4H-1-benzopyran-4-one |
| Temsirolimus                                                                                                                           | Ureidoglycine                                                                                                                                                                               | 3-Hydroxypregn-4-en-20-one                                                                      |
| PI(PGF1alpha/20:3(5Z,8Z,11Z))                                                                                                          | alpha-Hydroxy-NDMA                                                                                                                                                                          | Glycohyocholate                                                                                 |
| PA(13:0/PGD1)                                                                                                                          | 5-Ribosylparomamine                                                                                                                                                                         | Cyclohexenyl                                                                                    |
| PE(14:0/PGJ2)                                                                                                                          | 2-Hydroxyethylphosphonate                                                                                                                                                                   | Tetralin                                                                                        |
| Hydroxyisonobilin                                                                                                                      | p-CHLOROPHENYLALANINE                                                                                                                                                                       | 1-Methyl-2-propylbenzene                                                                        |
| Sirolimus                                                                                                                              | Ergocornine                                                                                                                                                                                 | Edrophonium                                                                                     |
| Soyasaponin gamma-A                                                                                                                    | Didemethylcitalopram                                                                                                                                                                        | L-2-Amino-3-methylenehexanoic acid                                                              |
| PE(PGJ2/20:4(8Z,11Z,14Z,17Z))                                                                                                          | Dimethylnitramine                                                                                                                                                                           | 7,8-Diaminononanoate                                                                            |
| PG(a-25:0/20:4(6E,8Z,11Z,14Z))+=O(5))                                                                                                  | 6'-Oxo-G418                                                                                                                                                                                 | 4-Acetoxy-2-hexyltetrahydrofuran                                                                |
| PI(22:3(10Z,13Z,16Z)/PGE2)                                                                                                             | PC(16:0/0:0)[U] / PC(16:0/0:0)[rac]                                                                                                                                                         |                                                                                                 |



|                                                                                               |                                                                                        |                                             |
|-----------------------------------------------------------------------------------------------|----------------------------------------------------------------------------------------|---------------------------------------------|
| PS(PGE1/20:0)                                                                                 | Mabioside D                                                                            | 2,3-Dihydroxypropyl octanoate               |
| Prostaglandin D1                                                                              | Erythromycin                                                                           | 1-Deoxypentalenate                          |
| Deoxycholic acid glycine conjugate                                                            | Glutamyl-Gamma-glutamate                                                               | Histidyllysine                              |
| PC(20:0/PGD1)                                                                                 | CDP-DG(PGF1alpha/i-19:0)                                                               | Lotusine                                    |
| Sodium glycochenodeoxycholate                                                                 | Tsuzaic acid                                                                           | SM(d18:1/22:6(5Z,7Z,10Z,13Z,16Z,19Z)-OH(4)) |
| PS(PGF1alpha/22:2(13Z,16Z))                                                                   | Polyporusterone B                                                                      | Arg Asn Val Phe                             |
| Ethyl 2-furanacrylate                                                                         | Deoxycholyglutamic acid                                                                | Filipin II                                  |
| Glycyl-L-histidyl-L-lysine                                                                    | 24-Hydroxytetracosanoic acid                                                           | (6S)-Tetrahydro-L-biopterin                 |
| (2S,3R)-2-Amino-3-[(2S)-2-amino-3-hydroxypropanoyl]oxybutanoic acid                           | Ser Ser Asp                                                                            | (S)-Pterosin P                              |
| Absinthin                                                                                     | Everolimus                                                                             | 5-Nitroxystearic acid                       |
| Aab(1) avermectin                                                                             | Pro Gly His                                                                            | Salinomycin                                 |
| Streptomycin                                                                                  | PE(P-16:0/0:0)                                                                         | PC(24:0/PGF1alpha)                          |
| Momordicoside B                                                                               | 3-Methylcytidine                                                                       | Valnemulin                                  |
| Anomurine                                                                                     | Glycylglycylglycylglycine                                                              | Sphinganine 1-phosphate                     |
| 3b,8a-Dihydroxy-6b-angeloyloxy-7(11)-eremophilene-12,8-olide                                  | PC(O-16:1(11Z)/2:0)                                                                    | PG(18:0/PGF1alpha)                          |
| Lysergic acid                                                                                 | n-methyl-2-(4'-methylaminophenyl)-6-hydroxybenzothiazole                               | 4'-Apo-beta,psi-caroten-4'-al               |
| PC(20:5(5Z,8Z,11Z,14Z,17Z)/PGF1alpha)                                                         | 7-[(1R)-2-[(1E,3S)-3-Hydroxyoct-1-en-1-yl]-5-oxocyclopent-2-en-1-yl]heptanoylcarnitine | PS(22:0/20:4(5Z,8Z,11Z,14Z)-OH(20))         |
| 12-oxo-5E,8E,10Z-dodecatricenoic acid                                                         | Ecdysone                                                                               | L-Serine-phosphoethanolamine                |
| Didesmethylimipramine                                                                         | DG(PGJ2/2:0/0:0)                                                                       | Valylhydroxyproline                         |
| (E)-2-methyl-4-((3aS)-1-methyl-2,3,8,8a-tetrahydropyrrolo[2,3-b]indol-3a(1H)-yl)but-2-en-1-ol | LysoPC(22:4(7Z,10Z,13Z,16Z))                                                           | PE(20:4(5Z,8Z,11Z,14Z)/P-18:0)              |
| Ipomeamaranol                                                                                 | Gentamicin C2b                                                                         | DG(PGF1alpha/2:0/0:0)                       |
| Lilopristone                                                                                  | Pinolenic Acid                                                                         | Phenylactate                                |
| N-Myristoyl Glutamine                                                                         | 12,13-DHOME                                                                            | N-Hexadecanoylpyrrolidine                   |
| PI(22:5(7Z,10Z,13Z,16Z,19Z)/PGD1)                                                             | Gly Ile Gly His                                                                        | Icosenoic acid                              |
| Lysyl-aspartyl-glutamyl-leucine                                                               | LysoPC(17:0/0:0)                                                                       | Benzene                                     |
| L-Olivosyl-oleandolide                                                                        | Imazodan                                                                               | Vecuronium                                  |
| Hexadecyl Acetyl Glycerol                                                                     | 4-Hydroxypromazine                                                                     | DG(2:0/0:0/PGF1alpha)                       |
| Red chlorophyll catabolite                                                                    | Butanoyl (2S)-2-amino-5-(diaminomethylideneamino)pentanoate                            | N-Stearoyl Tryptophan                       |
| 1-(2-Furanyl)-1-pentanone                                                                     | Arginyl-Gamma-glutamate                                                                | L-Dihydroanticapsin                         |
| Geranyl-hydroxybenzoate                                                                       | Elarofiban                                                                             | 1-(2-Hydroxyethoxy)methyl-5-methyluracil    |
| Rescinnamine                                                                                  | TetraHCA                                                                               | Prolyl-Arginine                             |
| Oleandolide                                                                                   | 6-Carboxy-5,6,7,8-tetrahydropterin                                                     | Thymidine                                   |
| Glutaminylleucine                                                                             | PS(20:3(8Z,11Z,14Z)-2OH(5,6)/22:2(13Z,16Z))                                            | Carbamazepine N-Glucuronide                 |
| DG(2:0/PGE2/0:0)                                                                              | Stearoylglycine                                                                        | Pro Ile Val Asp                             |
| Alfacalcidol                                                                                  | PC(O-14:1(1E)/0:0)                                                                     | (Methyl-ONN-azoxy)methyl acetate            |
| alpha-Linolenic acid                                                                          | Gymnodimine                                                                            | PG(a-13:0/i-12:0)                           |
| Phytosphingosine                                                                              | 7-Deoxyloganic alcohol                                                                 | 15-Deoxyprostaglandin J2                    |
| Solutol HS 15                                                                                 | Halleridone                                                                            | PA(14:0/PGF1alpha)                          |

|                                                                             |                                                                                      |                                                                |
|-----------------------------------------------------------------------------|--------------------------------------------------------------------------------------|----------------------------------------------------------------|
| (+)-4,11-Eudesmadien-3-one                                                  | Collettiside I                                                                       | PE(P-18:0/PGJ2)                                                |
| Polidocanol                                                                 | Indinavir                                                                            | PS(P-20:0/22:6(4Z,7Z,10Z,13Z,16Z,19Z))                         |
| Pandaroside B                                                               | CP 47,497-C8-homolog C-8-hydroxy metabolite                                          | Farnesyl pyrophosphate                                         |
| Tryptophyl-Proline                                                          | Corosin                                                                              | Polyporusterone F                                              |
| His Tyr Phe                                                                 | Val-Tyr-Leu-Arg                                                                      | PA(10:0/18:1(12Z)-2OH(9,10))                                   |
| PG(PGF2alpha/22:6(4Z,7Z,10Z,13Z,16Z,19Z))                                   | N-Nitrosotomatidine                                                                  | Angiotensin II                                                 |
| N6-Ethanimidoyl-D-lysine                                                    | 3-Ketopetromyzonol sulfate                                                           | PS(16:0/16:1(9Z))                                              |
| Styrene                                                                     | Benzenediazonium                                                                     | 4alpha-carboxy-4beta-methyl-5alpha-cholesta-8,24-dien-3beta-ol |
| 3,7-Dihydroxytetradecanoylcarnitine                                         | 2-Methylindoline                                                                     | PG(16:0/18:2(9Z,12Z))                                          |
| Arginylhydroxyproline                                                       | Eticyclidine                                                                         | PS(18:0/18:3(10,12,15)-OH(9))                                  |
| Prodigiosin                                                                 | PE(P-18:0/PGF2alpha)                                                                 | Avermectin A1a                                                 |
| (-)-trans-Carveol glucoside                                                 | (13E)-11a-Hydroxy-9,15-dioxoprost-13-enoic acid                                      | DG(12:0/TXB2/0:0)                                              |
| 11,14,15-THETA                                                              | dehydroabietadienol                                                                  | Hydroxyspirilloxanthin                                         |
| N-Eicosapentaenoyl Phenylalanine                                            | Lithocholic acid                                                                     | 1-Deoxy-11-oxopentalenate                                      |
| Erythromycin C                                                              | PE(18:0/0:0)                                                                         | Alanylhydroxyproline                                           |
| 28-Glucosyloleanoic acid 3-[rhamnosyl-(1->2)-galactosyl-(1->3)-glucuronide] | PS(P-16:0/13:0)                                                                      | Astaxanthin                                                    |
| PE(20:4(8Z,11Z,14Z,17Z)/22:2(13Z,16Z))                                      | PGP(20:1(11Z)/20:3(6,8,11)-OH(5))                                                    | Ginsenoside Rb1                                                |
| Toluene                                                                     | 1-arachidonoyl-2-hydroxy-sn-glycero-3-phosphate                                      | Cer(d16:1/20:3(8Z,11Z,14Z)-O(5,6))                             |
| N(6)-Methyllysine                                                           | 20-HETE ethanolamide                                                                 | PC(16:0/PGD1)                                                  |
| N6-Acetyl-N6-hydroxy-L-lysine                                               | (1R,7S,13S,15S)-2,15-Dihydroxy-7-methyl-6-oxabicyclo[11.3.0]hexadeca-3,11-dien-5-one | Arbaprostil                                                    |
| cis-6-Nitro-p-mentha-1(7),2-diene                                           | Hypothiocyanite                                                                      | Bipindogulomethylsoid                                          |
| 3,4-Dihydrocadalene                                                         | Catharanthine                                                                        | Hexosylsphingosine                                             |
| (Z)-alpha-Bergamotenoic acid                                                | 5-(3-Methyl-1-triazeno)imidazole-4-carboxamide                                       | PIP(PGF2alpha/18:0)                                            |
| 3,4-Dimethyl-5-pentyl-2-furanpropanoic acid                                 | Triethylenemelamine                                                                  | 3'-Sialyllactosamine                                           |
| Phencyclidine                                                               | 28-Norcasterone                                                                      | Crocin 3                                                       |
| 12-Oxo-2,3-dinor-10,15-phytodienoic acid                                    | lasalocid                                                                            | milbemycin alpha5                                              |
| 12-OPDA                                                                     | Tragopogonsaponin A                                                                  | PS(20:3(8Z,11Z,14Z)/24:0)                                      |
| 9,10,13-Trihydroxystearic acid                                              | n-Pentyl                                                                             | Ganoderiol B                                                   |
| 17(18)-EpETE                                                                | Triethylene glycol monohexyl ether                                                   | 2-Pentenal                                                     |
| HT-2 Toxin                                                                  | Oleylethanolamide                                                                    | Carpasemine                                                    |
| Chenodeoxycholic Acid                                                       | MG(0:0/21:0/0:0)                                                                     | Muscomin                                                       |
| methyl 2-Pyrimidine Carboxylate                                             | Vinaginsenoside R4                                                                   | Penta-1,3-diene                                                |
| Oleoyl glycine                                                              | DG(6 keto-PGF1alpha/2:0/0:0)                                                         | Ethen-1,1-diyl                                                 |
| 14(15)-EET-d11                                                              | D-Glycerate                                                                          | 3-Hydroxyhept-4-enoylcarnitine                                 |
| Leu Phe Val                                                                 | Fluoronaphthiridone                                                                  | Pro Pro Gly His                                                |
| 2-Hydroxypropyl 2-isopropyl-5-methylcyclohexyl carbonate                    | 5-Carboxy-2-oxohept-3-enedioate                                                      | 4-Hydroxyretinoic acid glucuronide                             |
| Bornaprolol                                                                 | Isoleucyl-Glutamine                                                                  | Zygadenine                                                     |
| Midecamycin acetate                                                         | N-(1-Deoxy-1-fructosyl)alanine                                                       | Tryptophyl-Cysteine                                            |
| Lys Lys Thr Pro                                                             | Thienamycin                                                                          | N,N-dimethyl-Safingol                                          |
| Aethusin                                                                    | Bethanechol                                                                          | Phytal                                                         |
| Talaromycin A                                                               | (10S)-Juvenile hormone III diol phosphate                                            | Phosphocholine                                                 |

|                                                           |                                                                            |                                                                       |
|-----------------------------------------------------------|----------------------------------------------------------------------------|-----------------------------------------------------------------------|
| Polyethylene, oxidized                                    | Trandolaprilat                                                             | 4alpha-carboxy-ergosta-7,24(241)-dien-3beta-ol                        |
| 1,5,5,8-Tetramethyl-12-thiabicyclo[9.1.0]dodeca-3,7-diene | 3a,7b,12a-Trihydroxyoxocholanyl-Glycine                                    | LysoPC(15:0)                                                          |
| Gibberellin A4                                            | PC(14:1(9Z)/15:1(9Z))                                                      | Octanoic acid                                                         |
| 7-Sulfocholic acid                                        | 2-Butyl-5-[2-(4-hydroxy-3-methoxyphenyl)ethyl]furan                        | 1-(3-Hydroxy-2,2,6-trimethyl-3,4-dihydrochromen-4-yl)pyrrolidin-2-one |
| 3'-Prenylapigenin 7-[rhamnosyl-(1->6)-glucoside]          | hydroquinidine                                                             | O-Arachidonoyl Glycidol                                               |
| Sagittatoside B                                           | Cer(d17:1/PGF2alpha)                                                       | Lys Val Gln Gln                                                       |
| 4,4'-Methylene bis(2-methylaniline)                       | Chymostatin                                                                | Vulgarone A                                                           |
| piperidino                                                | Hydroxyspheroidenone                                                       | 2-(Octadecyloxy)ethanol                                               |
| Gentamicin C2                                             | 1-Isothiocyano-3-phenylpropane                                             | Choline                                                               |
| 9-Fluoro-16alpha-methylpregn-4-ene-3,11,20-trione         | Rocuronium                                                                 | Phosphorylcholine                                                     |
| Isopropyl beta-D-glucoside                                | Fasciculol F                                                               | Isotabtoxin                                                           |
| 6-hydroxymethyl-7,8-dihydropterin                         | N-Stearoyl Asparagine                                                      | 1-Linoleoylglycerophosphocholine                                      |
| Sphinganine                                               | Rumenic acid                                                               | LysoPC(20:4(5Z,8Z,11Z,14Z))                                           |
| 7-Mercaptoheptanoylthreonine                              | Narbomycin                                                                 | Clavaminc acid                                                        |
| Butyl butyryllactate                                      | Narbonolide                                                                | Cyclopropyl                                                           |
| 5,8,11-Heptadecatriynoic acid                             | PE(22:2(13Z,16Z)/PGJ2)                                                     | LysoPC(18:2(9Z,12Z)/0:0)                                              |
| 5-Phosphoxy-L-lysine                                      | L-2-Aminoethyl seryl phosphate                                             | Sameridine                                                            |
| gamma-Glutamylproline                                     | 22-Angeloyltheasapogenol A                                                 | 20alpha-Hydroxycholesterol                                            |
| 6-deoxoteasterone                                         | 3,6-Nonadienal                                                             | LysoPC(20:4(8Z,11Z,14Z,17Z)/0:0)                                      |
| Palmitoyl Ethanolamide                                    | (3xi,5Z)-1,5-Octadien-3-ol                                                 | Fluridone                                                             |
| QH(2)                                                     | D-(+)-dihydrocarvone                                                       | Palmitoyl-L-carnitine                                                 |
| Di(2-ethylhexyl) adipate                                  | N-Isobutyloctadeca-trans-2-trans-4-dienamide                               | Lefamulin                                                             |
| xi-3,5-Dimethyl-2(5H)-furanone                            | Tetramethylchromanol glucoside                                             | Biolimus A9                                                           |
| L-Thyronine                                               | DG(20:5(5Z,8Z,11Z,14Z,16E)-OH(18R)/15:0/0:0)                               | Choline phosphate                                                     |
| 2,3-Dimethyl-2-cyclohexen-1-one                           | Elatoside G                                                                | Pyro-L-glutaminy-L-glutamine                                          |
| Chavicol                                                  | Sulforaphane-cysteine                                                      | 3-Carboxy-2,3,4,9-tetrahydro-1H-pyrido[3,4-b]indole-1-propanoic acid  |
| 7,8-Dihydrobiopterin                                      | 4-Dedimethylamino sancycline                                               | Isoprene                                                              |
| 5'-N-Methylcarboxamidoadenosine                           | Prosaikogenin A                                                            | Verdamicin                                                            |
| Eplerenone                                                | Maltol                                                                     | Cucurbitacin IIa                                                      |
| Dubinidine                                                | Asparaginy-L-Tyrosine                                                      | PS(14:0/18:1(12Z)-2OH(9,10))                                          |
| Phenylalanyl-prolyl-arginine                              | Iodothyronine                                                              | Glycerophospho-N-Palmitoyl Ethanolamine                               |
| Doxepin N-oxide glucuronide                               | Hebevinoside V                                                             | 3-Oxo-3-ureidopropanoate                                              |
| 6"-O-Carbamoylkanamycin A                                 | PS(20:4(5Z,8Z,11Z,14Z)/6 keto-PGF1alpha)                                   | 3beta-hydroxy-4beta-methyl-5alpha-cholest-7-ene-4alpha-carboxylate    |
| Sphingosine-1-phosphate                                   | LysoPE(0:0/16:0)                                                           | Petasinine                                                            |
| Sphingosine                                               | Isoleucyl-Arginine                                                         | CDP-DG(22:5(7Z,10Z,13Z,16Z,19Z)/18:3(10,12,15)-OH(9))                 |
| 3-Fluoro-2-hydroxyquinoline                               | N-Lauroyl Glutamine                                                        | Isoartocarpesin                                                       |
| PS(14:0/18:2(9Z,12Z))                                     | Leucyl-Gamma-glutamate                                                     | Asp Phe Tyr His                                                       |
| Lauroyl diethanolamide                                    | (2S,3R,4R)-2-Amino-3,4-dihydroxy-2-(hydroxymethyl)-14-oxoicos-6-enoic acid | (S,E)-Zearalenone                                                     |
| Ethyl salicylate                                          | Metabolite B                                                               | Lewis y Tetrasaccharide                                               |

|                                                                                                                                                      |                                                                                                                                                                                      |                                                                                                                                                                                                                                                 |
|------------------------------------------------------------------------------------------------------------------------------------------------------|--------------------------------------------------------------------------------------------------------------------------------------------------------------------------------------|-------------------------------------------------------------------------------------------------------------------------------------------------------------------------------------------------------------------------------------------------|
| Adipate semialdehyde                                                                                                                                 | PC(18:0/20:4(5Z,8Z,11Z,14Z)-OH(20))                                                                                                                                                  | Mycinamicin III                                                                                                                                                                                                                                 |
| PC(14:0/0:0)                                                                                                                                         | Laccarin                                                                                                                                                                             | Capsoside A                                                                                                                                                                                                                                     |
| LysoPG(18:2(9Z,12Z)/0:0)                                                                                                                             | Glutaminyllsine                                                                                                                                                                      | (-)-erythro-Anethole glycol 2-glucoside                                                                                                                                                                                                         |
| Aminopropanol                                                                                                                                        | 4-Hydroxy-6-methyl-3-(1-oxobutyl)-2H-pyran-2-one                                                                                                                                     | PI(22:4(10Z,13Z,16Z,19Z)/20:4(6Z,8E,10E,14Z)-2OH(5S,12R))                                                                                                                                                                                       |
| 1,2,3,4,tetrahydro-1,5,7-trimethylnaphthalene                                                                                                        | PE(22:5(7Z,10Z,13Z,16Z,19Z)/P-16:0)                                                                                                                                                  | Cholyphenylalanine                                                                                                                                                                                                                              |
| [3-(2-Aminopropyl)-6-methylidencyclohexa-1,3-dien-1-yl]methanediol                                                                                   | DG(20:0/20:5(5Z,8Z,11Z,14Z,17Z)/0:0)                                                                                                                                                 | PC(P-18:0/18:1(12Z)-O(9S,10R))                                                                                                                                                                                                                  |
| alpha-Campholene acetate                                                                                                                             | Asp Arg Ser Trp                                                                                                                                                                      | (5Z,7E,9E,14Z,17Z)-Icosapentaenoate                                                                                                                                                                                                             |
| alpha-Irone                                                                                                                                          | Baccatin III                                                                                                                                                                         | (1S,2S,4S,5S)-2,4-Thujanediol                                                                                                                                                                                                                   |
| Germacrone                                                                                                                                           | PE(P-18:1(9Z)/18:3(10,12,15)-OH(9))                                                                                                                                                  | 4-O-beta-D-Glucopyranoside                                                                                                                                                                                                                      |
| ( $\alpha$ )12,13-DiHOME                                                                                                                             | 2-Phenylethanol                                                                                                                                                                      | N-Oleoyldopamine                                                                                                                                                                                                                                |
| isoamyl                                                                                                                                              | DL-Ornithino-L-alanine                                                                                                                                                               | Oxyphenonium                                                                                                                                                                                                                                    |
| Fusarin C                                                                                                                                            | Anisomycin                                                                                                                                                                           | 2,3-Dinor-TXB1                                                                                                                                                                                                                                  |
| 3-Hydroxyhexadecanoylcarnitine                                                                                                                       | D-Lysopine                                                                                                                                                                           | PA(17:0/PGF2alpha)                                                                                                                                                                                                                              |
| [3h]Thienylcyclohexylpiperidine                                                                                                                      | Fasciculic acid B                                                                                                                                                                    | 4b-Hydroxystanzolol                                                                                                                                                                                                                             |
| 3-[[3-Methoxy-5-(1H-pyrrol-2-yl)pyrrol-2-ylidene]methyl]-1,4-dimethyl-4,5,6,7-tetrahydro-2H-isoindole                                                | (1R,3S,5Z)-5-[(2E)-2-[(1R,3As,7aR)-1-[(2R)-3-ethoxy-7-ethyl-7-hydroxynon-4-yn-2-yl]-7a-methyl-2,3,3a,5,6,7-hexahydro-1H-inden-4-ylidene]ethylidene]-4-methylidencyclohexane-1,3-diol | Desogestrel                                                                                                                                                                                                                                     |
| (S)-N-((S)-1-Amino-3,3-dimethyl-1-oxobutan-2-yl)-2-((S)-2-mercapto-4-(3,4,4-trimethyl-2,5-dioxoimidazolidin-1-yl)butanamido)-N,4-dimethylpentanamide | (8S,9S,10S,11S,13S,14S,17R)-11,17-Dihydroxy-17-(2-hydroxyacetyl)-10,13-dimethyl-9-nonyl-1,2,6,7,8,11,12,14,15,16-decahydrocyclopenta[a]phenanthren-3-one                             | (1R,4E,5'R,6R,6'R,7S,8S,10S,11S,12R,14S,15R,16S,18E,20E,22S,25R,27S,29S)-22-Ethyl-7,11,14,15-tetrahydroxy-6'-(2-hydroxypropyl)-5',6,8,10,12,14,16,29-octamethylspiro[2,26-dioxabicyclo[23.3.1]nonacos-4,18,20-triene-27,2'-oxane]-3,9,13-trione |
| Norethindrone                                                                                                                                        |                                                                                                                                                                                      | 3H-Pyrido(1,2-c)pyrimidin-3-one,                                                                                                                                                                                                                |
| <b>Upregulated</b>                                                                                                                                   |                                                                                                                                                                                      | 4-(2-(bis(1-methylethyl)amino)ethyl)-4,4a,5,6,7,8-hexahydro-1-methyl-4-phenyl-, trans-(+)-                                                                                                                                                      |
| Eicosen-1-ol                                                                                                                                         | 12,15-Epoxy-13,14-dimethyleicosa-10,12,14-trienoic acid                                                                                                                              | Maraviroc                                                                                                                                                                                                                                       |
| S-Nitroso-L-cysteinylglycine                                                                                                                         | PE(18:3(9Z,12Z,15Z)/24:1(15Z))                                                                                                                                                       | Cholyhistidine                                                                                                                                                                                                                                  |
| (+)-Setoclavine                                                                                                                                      | Triterpenoid                                                                                                                                                                         | PE-NMe2(20:0/18:1(11Z))                                                                                                                                                                                                                         |
| (E)-2-Octen-1-ol                                                                                                                                     | PC(P-16:0/20:5(5Z,8Z,10E,14Z,17Z)-OH(12))                                                                                                                                            | PS(20:0/PGD1)                                                                                                                                                                                                                                   |
| PE(22:5(4Z,7Z,10Z,13Z,16Z)/P-18:0)                                                                                                                   |                                                                                                                                                                                      |                                                                                                                                                                                                                                                 |

Table S4 Correlation between plasma metabolites and gut microbiota

| bacteria                     | metabolites                        | r     | P     |
|------------------------------|------------------------------------|-------|-------|
| Campylobacterota             | L-Leucine                          | 0.847 | 0.001 |
| Proteobacteria_Colon         | Inosine                            | 0.855 | 0.001 |
| Erysipelotrichaceae          | Inosine                            | 0.864 | 0.001 |
| Ruminococcaceae              | Inosine                            | 0.855 | 0.001 |
| Prevotella_9                 | Inosine                            | 0.920 | 0.000 |
| Subdoligranulum              | Inosine                            | 0.864 | 0.001 |
| Turicibacter                 | Inosine                            | 0.818 | 0.002 |
| Alloprevotella               | Indole                             | 0.818 | 0.002 |
| Subdoligranulum              | Sebacic acid                       | 0.836 | 0.001 |
| Alloprevotella               | Sebacic acid                       | 0.827 | 0.002 |
| Ruminococcaceae              | heptanoate                         | 0.809 | 0.003 |
| Prevotella_9                 | heptanoate                         | 0.856 | 0.001 |
| Proteobacteria_Colon         | Cholic acid                        | 0.827 | 0.002 |
| Erysipelotrichaceae          | Cholic acid                        | 0.864 | 0.001 |
| Ruminococcaceae              | Cholic acid                        | 0.882 | 0.000 |
| Prevotella_9                 | Cholic acid                        | 0.911 | 0.000 |
| Subdoligranulum              | Cholic acid                        | 0.891 | 0.000 |
| Turicibacter                 | Cholic acid                        | 0.818 | 0.002 |
| Ruminococcaceae              | Hexadecanedioic acid               | 0.818 | 0.002 |
| Prevotella_9                 | Hexadecanedioic acid               | 0.834 | 0.001 |
| Subdoligranulum              | Hexadecanedioic acid               | 0.809 | 0.003 |
| Alloprevotella               | Hexadecanedioic acid               | 0.845 | 0.001 |
| Ruminococcaceae              | 9,10-Epoxyoctadecanoic acid        | 0.809 | 0.003 |
| Prevotella_9                 | 9,10-Epoxyoctadecanoic acid        | 0.852 | 0.001 |
| Alloprevotella               | 9,10-Epoxyoctadecanoic acid        | 0.818 | 0.002 |
| Ruminococcus                 | Glycochenodeoxycholate             | 0.809 | 0.003 |
| Anaerococcus                 | Glycochenodeoxycholate             | 0.838 | 0.001 |
| unclassified_Eggerthellaceae | Glycochenodeoxycholate             | 0.820 | 0.002 |
| Gemella                      | Glycocholic acid 3-sulfate         | 0.834 | 0.001 |
| Ruminococcaceae              | Hexadecanoic acid                  | 0.845 | 0.001 |
| Subdoligranulum              | Hexadecanoic acid                  | 0.836 | 0.001 |
| Alloprevotella               | Hexadecanoic acid                  | 0.809 | 0.003 |
| Prevotella_9                 | Succinate                          | 0.802 | 0.003 |
| Alloprevotella               | Succinate                          | 0.864 | 0.001 |
| Ruminococcaceae              | Tetrahydrofolate                   | 0.900 | 0.000 |
| Prevotella_9                 | Tetrahydrofolate                   | 0.884 | 0.000 |
| Subdoligranulum              | Tetrahydrofolate                   | 0.900 | 0.000 |
| Subdoligranulum              | Glycocholic Acid                   | 0.827 | 0.002 |
| Proteobacteria_Colon         | Deoxycholic acid glycine conjugate | 0.818 | 0.002 |
| Proteobacteria_Colon         | Sodium glycochenodeoxycholate      | 0.818 | 0.002 |
| Alloprevotella               | alpha-Linolenic acid               | 0.864 | 0.001 |

|                                  |                             |          |          |
|----------------------------------|-----------------------------|----------|----------|
| Alloprevotella                   | Chenodeoxycholic Acid       | 0.818    | 0.002    |
| Subdoligranulum                  | Sphingosine-1-phosphate     | 0.827    | 0.002    |
| Oscillospiraceae                 | Sphingosine                 | 0.827    | 0.002    |
| Rikenellaceae                    | Sphingosine                 | 0.836    | 0.001    |
| Rikenellaceae_RC9_gut_group      | Sphingosine                 | 0.818    | 0.002    |
| Anaerococcus                     | Sphingosine                 | 0.897    | 0.000    |
| Alloprevotella                   | L-Isoleucine                | 0.855    | 0.001    |
| Lachnospiraceae                  | Indole                      | -0.86364 | 0.000612 |
| Lachnospiraceae_AC2044_group     | Indole                      | -0.85649 | 0.000761 |
| Treponema                        | Indole                      | -0.84545 | 0.001045 |
| unclassified_Christensenellaceae | Indole                      | -0.88182 | 0.00033  |
| Ruminococcus                     | 9-Oxononanoic acid          | -0.90909 | 0.000106 |
| Campylobacterota                 | 9-Oxononanoic acid          | -0.84545 | 0.001045 |
| Lachnospiraceae                  | Sebacic acid                | -0.86364 | 0.000612 |
| unclassified_Christensenellaceae | Sebacic acid                | -0.81818 | 0.002083 |
| Ruminococcus                     | Sebacic acid                | -0.85455 | 0.000807 |
| Lachnospiraceae                  | heptanoate                  | -0.84545 | 0.001045 |
| Treponema                        | heptanoate                  | -0.82727 | 0.001677 |
| unclassified_Christensenellaceae | heptanoate                  | -0.84545 | 0.001045 |
| Ruminococcus                     | heptanoate                  | -0.84545 | 0.001045 |
| Lachnospiraceae                  | Hexadecanedioic acid        | -0.88182 | 0.00033  |
| Lachnospiraceae_AC2044_group     | Hexadecanedioic acid        | -0.80638 | 0.002715 |
| Treponema                        | Hexadecanedioic acid        | -0.88182 | 0.00033  |
| unclassified_Christensenellaceae | Hexadecanedioic acid        | -0.85455 | 0.000807 |
| Ruminococcus                     | Hexadecanedioic acid        | -0.80909 | 0.002559 |
| Lachnospiraceae                  | 9,10-Epoxyoctadecanoic acid | -0.84545 | 0.001045 |
| Treponema                        | 9,10-Epoxyoctadecanoic acid | -0.86364 | 0.000612 |
| unclassified_Christensenellaceae | 9,10-Epoxyoctadecanoic acid | -0.82727 | 0.001677 |
| Turicibacter                     | Glycochenodeoxycholate      | -0.80909 | 0.002559 |
| Lachnospiraceae                  | Hexadecanoic acid           | -0.84545 | 0.001045 |
| Lachnospiraceae_AC2044_group     | Hexadecanoic acid           | -0.88383 | 0.000307 |
| Treponema                        | Hexadecanoic acid           | -0.85455 | 0.000807 |
| unclassified_Christensenellaceae | Hexadecanoic acid           | -0.87273 | 0.000455 |
| Lachnospiraceae_AC2044_group     | Succinate                   | -0.82005 | 0.001994 |
| unclassified_Christensenellaceae | Succinate                   | -0.89091 | 0.000233 |
| Ruminococcus                     | Succinate                   | -0.87273 | 0.000455 |
| Lachnospiraceae                  | Tetrahydrofolate            | -0.81818 | 0.002083 |
| Lachnospiraceae_AC2044_group     | Tetrahydrofolate            | -0.82005 | 0.001994 |
| Treponema                        | Tetrahydrofolate            | -0.82727 | 0.001677 |
| unclassified_Christensenellaceae | Tetrahydrofolate            | -0.80909 | 0.002559 |
| Ruminococcus                     | Tetrahydrofolate            | -0.83636 | 0.001333 |
| Oscillospiraceae                 | Taurodeoxycholic acid       | -0.83636 | 0.001333 |
| Campylobacterota                 | Taurodeoxycholic acid       | -0.89091 | 0.000233 |
| unclassified_Enterobacteriaceae  | Taurodeoxycholic acid       | -0.90661 | 0.000119 |

|                                  |                                    |          |          |
|----------------------------------|------------------------------------|----------|----------|
| Campylobacterota                 | Glycocholic Acid                   | -0.88182 | 0.00033  |
| unclassified_Enterobacteriaceae  | Glycocholic Acid                   | -0.84738 | 0.000991 |
| Lachnospiraceae                  | Deoxycholic acid glycine conjugate | -0.81818 | 0.002083 |
| Campylobacterota                 | Deoxycholic acid glycine conjugate | -0.85455 | 0.000807 |
| unclassified_Enterobacteriaceae  | Deoxycholic acid glycine conjugate | -0.85649 | 0.000761 |
| Lachnospiraceae                  | Sodium glycochenodeoxycholate      | -0.85455 | 0.000807 |
| Oscillospiraceae                 | Sodium glycochenodeoxycholate      | -0.81818 | 0.002083 |
| Campylobacterota                 | Sodium glycochenodeoxycholate      | -0.83636 | 0.001333 |
| unclassified_Enterobacteriaceae  | Sodium glycochenodeoxycholate      | -0.91572 | 7.58E-05 |
| Lachnospiraceae                  | alpha-Linolenic acid               | -0.84545 | 0.001045 |
| Lachnospiraceae_AC2044_group     | alpha-Linolenic acid               | -0.80182 | 0.002993 |
| Treponema                        | alpha-Linolenic acid               | -0.84545 | 0.001045 |
| unclassified_Enterobacteriaceae  | alpha-Linolenic acid               | -0.8246  | 0.001789 |
| Lachnospiraceae                  | Chenodeoxycholic Acid              | -0.89091 | 0.000233 |
| Treponema                        | Chenodeoxycholic Acid              | -0.84545 | 0.001045 |
| Campylobacterota                 | Chenodeoxycholic Acid              | -0.80909 | 0.002559 |
| unclassified_Enterobacteriaceae  | Chenodeoxycholic Acid              | -0.83827 | 0.001268 |
| Campylobacterota                 | Sphingosine-1-phosphate            | -0.88182 | 0.00033  |
| unclassified_Enterobacteriaceae  | Sphingosine-1-phosphate            | -0.84738 | 0.000991 |
| Rikenellaceae                    | Octanoic acid                      | -0.81818 | 0.002083 |
| unclassified_Enterobacteriaceae  | Octanoic acid                      | -0.86105 | 0.000663 |
| Lachnospiraceae                  | L-Isoleucine                       | -0.89091 | 0.000233 |
| Treponema                        | L-Isoleucine                       | -0.9     | 0.00016  |
| unclassified_Christensenellaceae | L-Isoleucine                       | -0.80909 | 0.002559 |

---

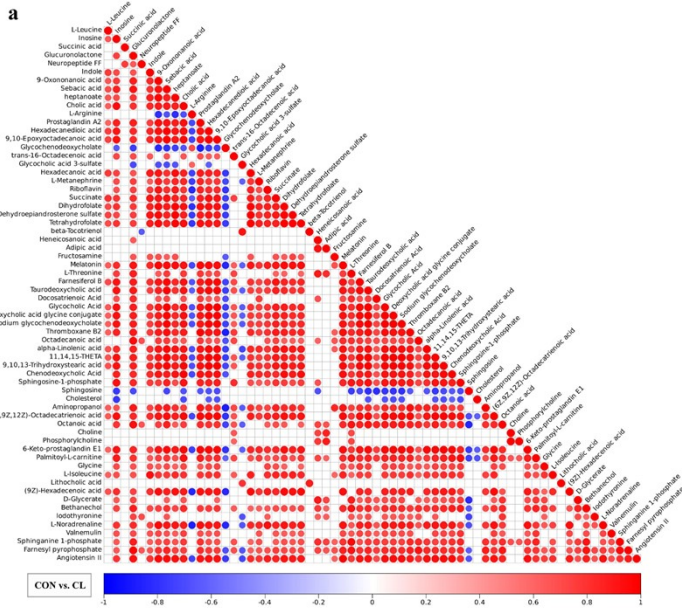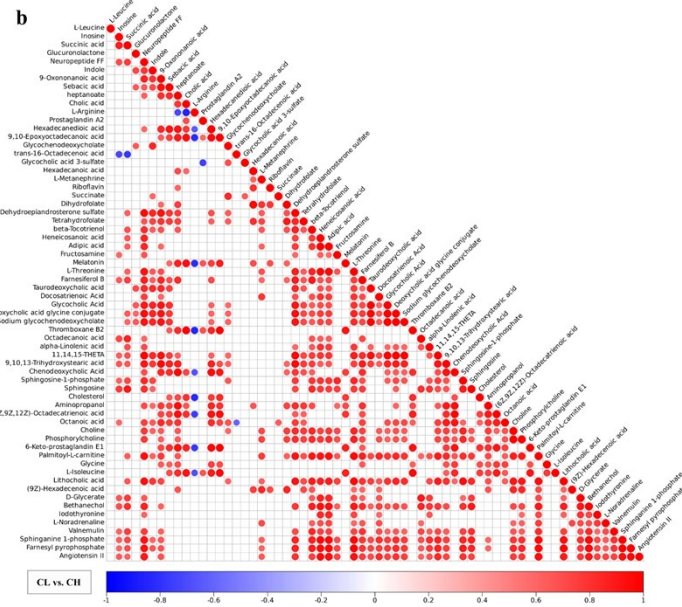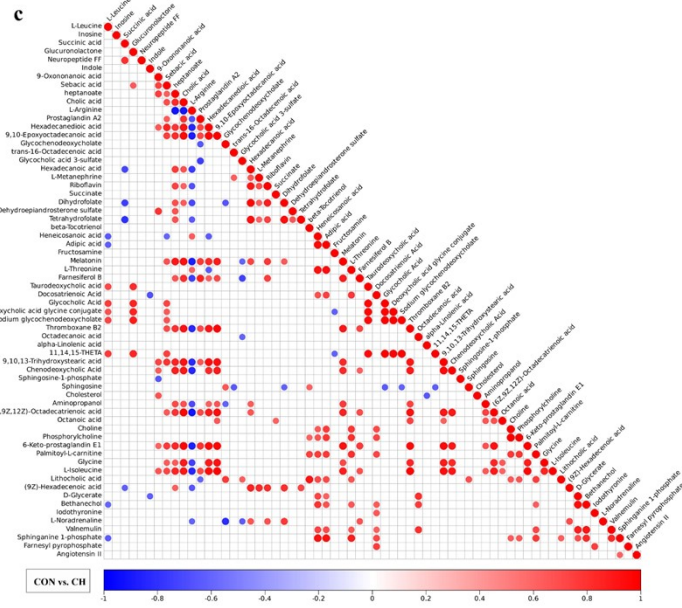



Fig S1: Correlation analysis of differential metabolites. (a) CON vs. CL. (b) CL vs. CH.  
(c) CON vs. CH. Red for positive correlations and blue for negative.
