# Supplementary figures and images for: Dietary-fat supplementation alleviates cold temperature-induced metabolic dysbiosis and barrier impairment by remodeling gut microbiota
Source: Royal Society of Chemistry journal article supplement (doi:10.1039/d3fo04916g), 2024-01-01

### Ileum

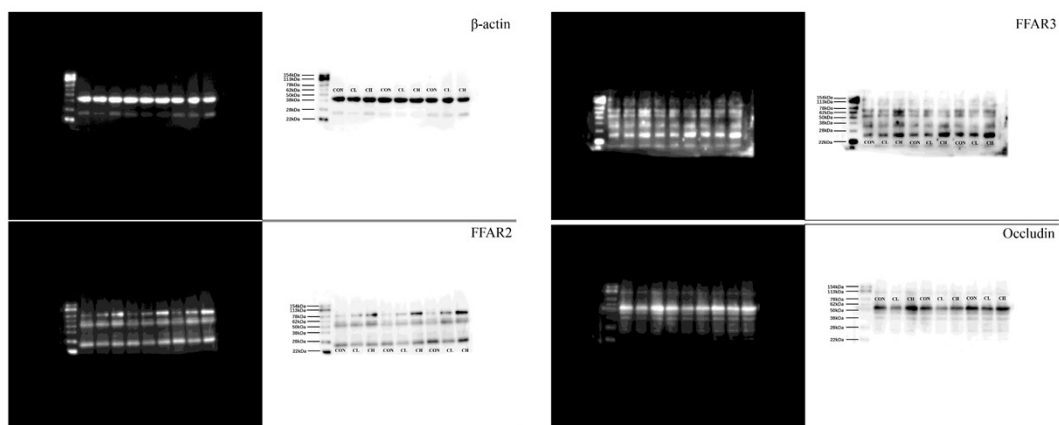

### colon

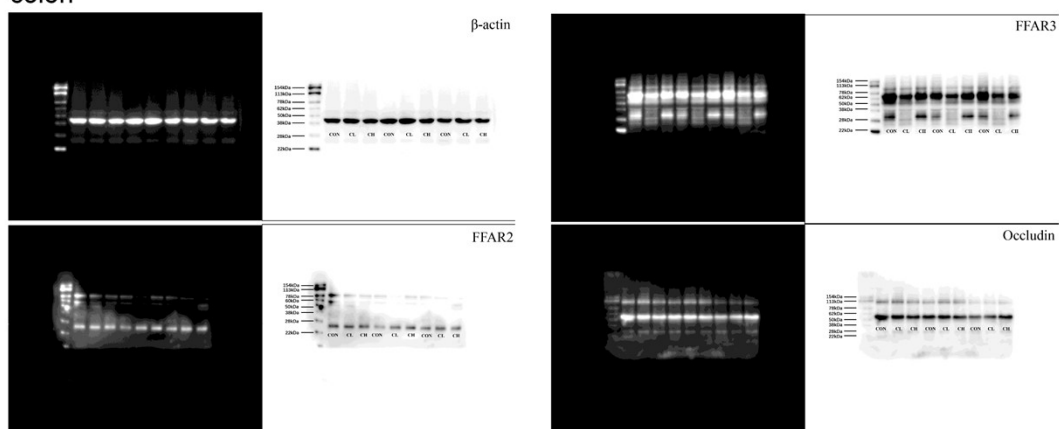

### Western blot

Supplement: d3fo04916g1.pdf [file d3fo04916g1.pdf]
